# Supplementary material for: Global DNA Hypomethylation in Epithelial Ovarian Cancer: Passive Demethylation and Association with Genomic Instability
Source: Cancers (Basel). 2020 Mar 24;12(3):764. doi: 10.3390/cancers12030764 (PMC7140107; doi:10.3390/cancers12030764)
Supplement: Supplementary file 1 [file cancers-12-00764-s001.zip]

Archive with 18 entries (18 files):
- FOXM1 Cancers uncropped Western blot.pptx
- Supplemental Figures.pdf
- Supplemental Figures.pptx
- Wa_ Supplementary Table 1 DEG #s Summary.xlsx
- Wa_ Supplementary Table 10 Histone Marks vs. hypo blocks.xlsx
- Wa_ Supplementary Table 11 RE expression vs. methylation.xlsx
- Wa_ Supplementary Table 12 REs vs. hypo blocks.xlsx
- Wa_ Supplementary Table 13 EOC Clinicopathological Info.xlsx
- Wa_ Supplementary Table 14 Genomic Analyses Sample List.xlsx
- Wa_ Supplementary Table 15 Primer Sequences.xlsx
- Wa_ Supplementary Table 2 DEG and disease matched DEG list.xlsx
- Wa_ Supplementary Table 3 IPA Pathways summary.xlsx
- Wa_ Supplementary Table 4 CG DEG Summary.xlsx
- Wa_ Supplementary Table 5 Epigenetic DEG Summary.xlsx
- Wa_ Supplementary Table 6 Histone DEG Summary.xlsx
- Wa_ Supplementary Table 7 Hypo block comparison GDHO(+) vs. GDHO(-) EOC.xlsx
- Wa_ Supplementary Table 8 MethylSeq Coverage Data.xlsx
- Wa_ Supplementary Table 9 TF binding sites vs. hypo blocks.xlsx
