# Supplementary material for: Global DNA Hypomethylation in Epithelial Ovarian Cancer: Passive Demethylation and Association with Genomic Instability
Source: Cancers (Basel). 2020 Mar 24;12(3):764. doi: 10.3390/cancers12030764 (PMC7140107; doi:10.3390/cancers12030764)
Supplement: Supplementary file 1 [file cancers-12-00764-s001.zip › Wa_ Supplementary Table 1 DEG #s Summary.xlsx]

## Sheet: Supplemental Table 1
Zhang et al. Supplementary Table 1. Differentially expressed genes (DEG) in NO, EOC, GDHO(+), and GDHO(−) EOC
				GDHO(+) EOC	GDHO(+) EOC
			EOC vs. NO	vs.	vs.
				GDHO(−) EOC	GDHO(−) EOC
Affymetrix HG 1.0ST Microarrays				All	Disease-matched
Sample Comparisons (N)			40 vs. 3	20 vs. 20	13 vs. 9
pval ≤ 0.01	ALL DEGs	Upregulated	1782	958	357
		DownRegulated	3121	738	395
		ALL	4903	1696	752
	Expression change ≥ 2 fold	Upregulated	866	75	69
		DownRegulated	920	109	80
		ALL	1786	184	149
FDR ≤ 0.05	ALL DEGs	Upregulated	1143	180	29
		DownRegulated	2291	59	18
		ALL	3434	239	47
	Expression change ≥ 2 fold	Upregulated	699	48	19
		DownRegulated	897	19	14
		ALL	1596	67	33
