# Supplementary material for: Global DNA Hypomethylation in Epithelial Ovarian Cancer: Passive Demethylation and Association with Genomic Instability
Source: Cancers (Basel). 2020 Mar 24;12(3):764. doi: 10.3390/cancers12030764 (PMC7140107; doi:10.3390/cancers12030764)
Supplement: Supplementary file 1 [file cancers-12-00764-s001.zip › Wa_ Supplementary Table 2 DEG and disease matched DEG list.xlsx]

## Sheet: DEGs of all EOCs
Zhang et al. Supplementary Table 2. Differentially expressed genes of all GDHO(+) EOC vs. GDHO(‒) EOC (P≤0.01)
Affymetrix HG 1.0ST Arrays
				All Samples
Probe_ID	Gene Symbol	Gene Title	chr	GDHO(+) vs. GDHO(−)
				Log2	p-value
8175353	CT45A2 /// CT45A4 /// CT45A6 /// CT45A1 /// CT45A3 /// CT45A5	cancer/testis antigen family 45, member A2 /// cancer/testis antigen family 45, member A4 /// cancer/testis antigen family 45, member A6 /// cancer/testis antigen family 45, member A1 /// cancer/testis antigen family 45, member A3 /// cancer/testis antigen family 45, member A5	chrX	3.81	1.98e-06
8170052	CT45A1 /// CT45A3 /// CT45A2 /// CT45A6 /// CT45A4 /// CT45A5	cancer/testis antigen family 45, member A1 /// cancer/testis antigen family 45, member A3 /// cancer/testis antigen family 45, member A2 /// cancer/testis antigen family 45, member A6 /// cancer/testis antigen family 45, member A4 /// cancer/testis antigen family 45, member A5	chrX	3.57	2.57e-06
8175336	CT45A2 /// CT45A3 /// CT45A4 /// CT45A1 /// CT45A6 /// CT45A5	cancer/testis antigen family 45, member A2 /// cancer/testis antigen family 45, member A3 /// cancer/testis antigen family 45, member A4 /// cancer/testis antigen family 45, member A1 /// cancer/testis antigen family 45, member A6 /// cancer/testis antigen family 45, member A5	chrX	3.5	2.6e-06
8170060	CT45A2 /// CT45A4 /// CT45A3 /// CT45A1 /// CT45A6 /// CT45A5	cancer/testis antigen family 45, member A2 /// cancer/testis antigen family 45, member A4 /// cancer/testis antigen family 45, member A3 /// cancer/testis antigen family 45, member A1 /// cancer/testis antigen family 45, member A6 /// cancer/testis antigen family 45, member A5	chrX	3.48	2.44e-06
8175344	CT45A2 /// CT45A4 /// CT45A5 /// CT45A3 /// CT45A6	cancer/testis antigen family 45, member A2 /// cancer/testis antigen family 45, member A4 /// cancer/testis antigen family 45, member A5 /// cancer/testis antigen family 45, member A3 /// cancer/testis antigen family 45, member A6	chrX	3.17	2.83e-06
8067208	CTCFL	CCCTC-binding factor (zinc finger protein)-like	chr20	3.11	1.67e-10
8170068	CT45A2 /// CT45A3 /// CT45A4 /// CT45A1 /// CT45A6 /// CT45A5	cancer/testis antigen family 45, member A2 /// cancer/testis antigen family 45, member A3 /// cancer/testis antigen family 45, member A4 /// cancer/testis antigen family 45, member A1 /// cancer/testis antigen family 45, member A6 /// cancer/testis antigen family 45, member A5	chrX	3.1	3.6e-06
8067305	SYCP2	synaptonemal complex protein 2	chr20	2.42	2.21e-07
7963817	GTSF1	gametocyte specific factor 1	chr12	2.37	0.000102
8167560	GAGE10 /// GAGE12D /// GAGE12H /// GAGE12E /// GAGE12C /// GAGE2D /// GAGE12J /// GAGE12G /// GAGE13 /// GAGE8 /// GAGE2E /// GAGE12B /// GAGE12B /// GAGE12F /// GAGE12I /// GAGE7 /// GAGE6 /// GAGE5 /// GAGE4 /// GAGE2A /// GAGE2C	G antigen 10 /// G antigen 12D /// G antigen 12H /// G antigen 12E /// G antigen 12C /// G antigen 2D /// G antigen 12J /// G antigen 12G /// G antigen 13 /// G antigen 8 /// G antigen 2E /// G antigen 12B /// G antigen 12B /// G antigen 12F /// G antigen 12I /// G antigen 7 /// G antigen 6 /// G antigen 5 /// G antigen 4 /// G antigen 2A /// G antigen 2C	chrX	2.24	0.01
8167482	GAGE2E /// GAGE2D /// GAGE5 /// GAGE2C /// GAGE4 /// GAGE12D /// GAGE12E /// GAGE12B /// GAGE12C /// GAGE12F /// GAGE12G /// GAGE12I /// GAGE7 /// GAGE6 /// GAGE12H /// GAGE2A	G antigen 2E /// G antigen 2D /// G antigen 5 /// G antigen 2C /// G antigen 4 /// G antigen 12D /// G antigen 12E /// G antigen 12B /// G antigen 12C /// G antigen 12F /// G antigen 12G /// G antigen 12I /// G antigen 7 /// G antigen 6 /// G antigen 12H /// G antigen 2A	chrX	2.14	0.00185
8167562	---	---	chrX	2.14	0.00185
8140650	SEMA3E	sema domain, immunoglobulin domain (Ig), short basic domain, secreted, (semaphorin) 3E	chr7	2.13	0.000164
8175562	MAGEC2	melanoma antigen family C, 2	chrX	2.11	0.00259
8167577	GAGE5 /// GAGE7 /// GAGE12I /// GAGE12G /// GAGE12F /// GAGE4 /// GAGE6 /// GAGE12D /// GAGE12E /// GAGE12B /// GAGE12C /// GAGE12H /// GAGE12J	G antigen 5 /// G antigen 7 /// G antigen 12I /// G antigen 12G /// G antigen 12F /// G antigen 4 /// G antigen 6 /// G antigen 12D /// G antigen 12E /// G antigen 12B /// G antigen 12C /// G antigen 12H /// G antigen 12J	chrX	2.09	0.00268
8167584	GAGE5 /// GAGE7 /// GAGE12I /// GAGE12G /// GAGE12F /// GAGE4 /// GAGE6 /// GAGE12D /// GAGE12E /// GAGE12B /// GAGE12C /// GAGE12H /// GAGE12J	G antigen 5 /// G antigen 7 /// G antigen 12I /// G antigen 12G /// G antigen 12F /// G antigen 4 /// G antigen 6 /// G antigen 12D /// G antigen 12E /// G antigen 12B /// G antigen 12C /// G antigen 12H /// G antigen 12J	chrX	2.09	0.00268
8167508	GAGE5 /// GAGE7 /// GAGE12I /// GAGE12G /// GAGE12F /// GAGE4 /// GAGE6 /// GAGE12D /// GAGE12E /// GAGE12B /// GAGE12C /// GAGE12H /// GAGE12J /// GAGE2D	G antigen 5 /// G antigen 7 /// G antigen 12I /// G antigen 12G /// G antigen 12F /// G antigen 4 /// G antigen 6 /// G antigen 12D /// G antigen 12E /// G antigen 12B /// G antigen 12C /// G antigen 12H /// G antigen 12J /// G antigen 2D	chrX	1.99	0.00251
8170834	TKTL1	transketolase-like 1	chrX	1.95	0.00299
8047910	PTH2R	parathyroid hormone 2 receptor	chr2	1.93	3.09e-09
8167526	GAGE1 /// GAGE2C /// GAGE12D /// GAGE12H /// GAGE12E /// GAGE12C /// GAGE2D /// GAGE12J /// GAGE12G /// GAGE2A /// GAGE8	G antigen 1 /// G antigen 2C /// G antigen 12D /// G antigen 12H /// G antigen 12E /// G antigen 12C /// G antigen 2D /// G antigen 12J /// G antigen 12G /// G antigen 2A /// G antigen 8	chrX	1.79	0.00327
8055153	POTEE /// POTEF /// POTEI /// POTEJ	POTE ankyrin domain family, member E /// POTE ankyrin domain family, member F /// POTE ankyrin domain family, member I /// POTE ankyrin domain family, member J	chr2	1.72	3.46e-09
8045257	POTEE /// POTEF	POTE ankyrin domain family, member E /// POTE ankyrin domain family, member F	chr2	1.71	5.65e-09
8092682	SST	somatostatin	chr3	1.69	0.000732
8055222	POTEF	POTE ankyrin domain family, member F	chr2	1.66	4.35e-09
7977456	POTEG /// POTEH /// POTEM	POTE ankyrin domain family, member G /// POTE ankyrin domain family, member H /// POTE ankyrin domain family, member M	chr14	1.62	2.79e-09
8067844	LOC100288966 /// POTEB /// POTEC /// POTED	POTE ankyrin domain family member D-like /// POTE ankyrin domain family, member B /// POTE ankyrin domain family, member C /// POTE ankyrin domain family, member D	chr21	1.61	3.51e-09
8136807	---	---	---	1.59	1.9e-05
7917276	LPAR3	lysophosphatidic acid receptor 3	chr1	1.57	0.000696
7986605	LOC100288966 /// POTEB /// POTEC /// POTED	POTE ankyrin domain family member D-like /// POTE ankyrin domain family, member B /// POTE ankyrin domain family, member C /// POTE ankyrin domain family, member D	chr15	1.55	1.14e-09
8167261	SSX4 /// SSX4B	synovial sarcoma, X breakpoint 4 /// synovial sarcoma, X breakpoint 4B	chrX	1.54	0.000653
8172415	SSX9	synovial sarcoma, X breakpoint 9	chrX	1.5	0.000724
8139776	---	---	chr7	1.5	0.00109
8136790	---	---	chr7	1.49	0.000343
8022428	LOC100288966 /// POTEB /// POTEC /// POTED	POTE ankyrin domain family member D-like /// POTE ankyrin domain family, member B /// POTE ankyrin domain family, member C /// POTE ankyrin domain family, member D	chr18	1.47	9.67e-10
8101126	CXCL10	chemokine (C-X-C motif) ligand 10	chr4	1.45	8.54e-06
8068570	DSCR8	Down syndrome critical region gene 8	chr21	1.44	0.000315
8074170	POTEG /// POTEH /// POTEM	POTE ankyrin domain family, member G /// POTE ankyrin domain family, member H /// POTE ankyrin domain family, member M	chr22	1.42	9.03e-09
8035304	BST2	bone marrow stromal cell antigen 2	chr19	1.39	4.48e-05
8121911	CENPW	centromere protein W	chr6	1.38	4.19e-06
8046020	SCN2A	sodium channel, voltage-gated, type II, alpha subunit	chr2	1.36	0.00196
8167575	GAGE12F /// GAGE12G /// GAGE12I /// GAGE7 /// GAGE6 /// GAGE5 /// GAGE4 /// GAGE2B /// GAGE2C /// GAGE12D /// GAGE12E /// GAGE12B /// GAGE12C /// GAGE12H /// GAGE2A	G antigen 12F /// G antigen 12G /// G antigen 12I /// G antigen 7 /// G antigen 6 /// G antigen 5 /// G antigen 4 /// G antigen 2B /// G antigen 2C /// G antigen 12D /// G antigen 12E /// G antigen 12B /// G antigen 12C /// G antigen 12H /// G antigen 2A	chrX	1.34	0.01
8045210	CYP4F43P /// LOC440905 /// CYP4F43P /// CYP4F30P	cytochrome P450, family 4, subfamily F, polypeptide 43, pseudogene /// uncharacterized LOC440905 /// cytochrome P450, family 4, subfamily F, polypeptide 43, pseudogene /// cytochrome P450, family 4, subfamily F, polypeptide 30, pseudogene	chr2	1.33	4.91e-08
7914127	IFI6	interferon, alpha-inducible protein 6	chr1	1.33	2.15e-05
8139792	---	---	chr7	1.33	0.00357
7972983	POTEG /// POTEM	POTE ankyrin domain family, member G /// POTE ankyrin domain family, member M	chr14	1.31	1.44e-08
8094778	UCHL1	ubiquitin carboxyl-terminal esterase L1 (ubiquitin thiolesterase)	chr4	1.3	0.00013
7961626	SLCO1A2	solute carrier organic anion transporter family, member 1A2	chr12	1.28	2.64e-05
8101131	CXCL11	chemokine (C-X-C motif) ligand 11	chr4	1.28	6.06e-05
8055214	CYP4F43P /// LOC440905 /// CYP4F43P /// CYP4F30P	cytochrome P450, family 4, subfamily F, polypeptide 43, pseudogene /// uncharacterized LOC440905 /// cytochrome P450, family 4, subfamily F, polypeptide 43, pseudogene /// cytochrome P450, family 4, subfamily F, polypeptide 30, pseudogene	chr2	1.27	4.22e-08
8124380	HIST1H1A	histone cluster 1, H1a	chr6	1.21	7.94e-06
8055143	LOC440905	uncharacterized LOC440905	chr2	1.2	7.78e-08
8088954	---	---	chr3	1.17	0.00125
8136801	PRSS3P2	protease, serine, 3 pseudogene 2	chr7	1.16	4.68e-05
7915592	RNU5D-1	RNA, U5D small nuclear 1	chr1	1.16	0.00519
8124531	HIST1H3I /// HIST1H3F /// HIST1H3B /// HIST1H3H /// HIST1H3J /// HIST1H3G /// HIST1H3E /// HIST1H3C /// HIST1H3D /// HIST1H3A	histone cluster 1, H3i /// histone cluster 1, H3f /// histone cluster 1, H3b /// histone cluster 1, H3h /// histone cluster 1, H3j /// histone cluster 1, H3g /// histone cluster 1, H3e /// histone cluster 1, H3c /// histone cluster 1, H3d /// histone cluster 1, H3a	chr6	1.12	3.6e-07
7929065	IFIT1	interferon-induced protein with tetratricopeptide repeats 1	chr10	1.12	0.000358
8092348	LAMP3	lysosomal-associated membrane protein 3	chr3	1.1	5.04e-05
7915612	PTCH2	patched 2	chr1	1.09	7.99e-05
8170531	MAGEA4	melanoma antigen family A, 4	chrX	1.09	0.000557
8136795	PRSS1	protease, serine, 1 (trypsin 1)	chr7	1.08	4.93e-05
7998898	CLDN6	claudin 6	chr16	1.08	0.000172
8105495	PART1	prostate androgen-regulated transcript 1 (non-protein coding)	chr5	1.08	0.000953
8170076	SAGE1	sarcoma antigen 1	chrX	1.08	0.00304
8046078	B3GALT1	UDP-Gal:betaGlcNAc beta 1,3-galactosyltransferase, polypeptide 1	chr2	1.08	0.00602
8061579	TPX2	TPX2, microtubule-associated, homolog (Xenopus laevis)	chr20	1.06	4.6e-08
8074606	USP18 /// USP41	ubiquitin specific peptidase 18 /// ubiquitin specific peptidase 41	chr22	1.06	2.06e-05
7990555	NRG4	neuregulin 4	chr15	1.06	0.00402
8002181	DPEP3	dipeptidase 3	chr16	1.04	0.00453
8151432	---	---	chr8	1.02	2.42e-06
8040080	RSAD2	radical S-adenosyl methionine domain containing 2	chr2	1.02	0.000106
8124388	HIST1H3B /// HIST1H3F /// HIST1H3H /// HIST1H3J /// HIST1H3G /// HIST1H3I /// HIST1H3E /// HIST1H3C /// HIST1H3D /// HIST1H3A	histone cluster 1, H3b /// histone cluster 1, H3f /// histone cluster 1, H3h /// histone cluster 1, H3j /// histone cluster 1, H3g /// histone cluster 1, H3i /// histone cluster 1, H3e /// histone cluster 1, H3c /// histone cluster 1, H3d /// histone cluster 1, H3a	chr6	1.01	2.18e-05
8157650	PTGS1	prostaglandin-endoperoxide synthase 1 (prostaglandin G/H synthase and cyclooxygenase)	chr9	1.01	3.43e-05
8062766	MYBL2	v-myb myeloblastosis viral oncogene homolog (avian)-like 2	chr20	1	3.59e-06
8095339	---	---	chr4	1	0.00139
8117594	HIST1H2BM	histone cluster 1, H2bm	chr6	1	0.0023
7973629	REC8	REC8 homolog (yeast)	chr14	0.99	1.17e-05
8058627	ERBB4	v-erb-a erythroblastic leukemia viral oncogene homolog 4 (avian)	chr2	0.99	0.000875
8151931	TSPYL5	TSPY-like 5	chr8	0.98	3.32e-05
7973002	---	---	chr14	0.97	3.72e-09
8129134	ROS1	c-ros oncogene 1 , receptor tyrosine kinase	chr6	0.97	0.00974
8083233	ZIC1	Zic family member 1	chr3	0.96	0.000459
8067167	AURKA	aurora kinase A	chr20	0.95	1.49e-05
8100464	NMU	neuromedin U	chr4	0.95	9.71e-05
7901256	CYP4B1	cytochrome P450, family 4, subfamily B, polypeptide 1	chr1	0.95	0.01
8120838	TTK	TTK protein kinase	chr6	0.94	1.84e-05
8139699	FLJ45974	uncharacterized LOC401337	chr7	0.94	5.05e-05
8027402	CCNE1	cyclin E1	chr19	0.94	8.25e-05
7976443	IFI27	interferon, alpha-inducible protein 27	chr14	0.94	0.00224
7950560	GDPD4	glycerophosphodiester phosphodiesterase domain containing 4	chr11	0.94	0.01
7901010	KIF2C	kinesin family member 2C	chr1	0.93	2.87e-07
8055314	LYPD1	LY6/PLAUR domain containing 1	chr2	0.93	0.00142
8034772	ASF1B	ASF1 anti-silencing function 1 homolog B (S. cerevisiae)	chr19	0.92	1.54e-05
8121850	HEY2	hairy/enhancer-of-split related with YRPW motif 2	chr6	0.92	0.00233
8106336	SV2C	synaptic vesicle glycoprotein 2C	chr5	0.92	0.00756
7929334	CEP55	centrosomal protein 55kDa	chr10	0.91	4.11e-06
8063043	UBE2C	ubiquitin-conjugating enzyme E2C	chr20	0.91	6.27e-06
7901497	ZYG11A	zyg-11 homolog A (C. elegans)	chr1	0.91	0.000122
8175710	CSAG3 /// CSAG2 /// CSAG3 /// CSAG2	CSAG family, member 3 /// CSAG family, member 2 /// CSAG family, member 3 /// CSAG family, member 2	chrX	0.91	0.01
7947363	WT1	Wilms tumor 1	chr11	0.89	0.00109
8170580	CSAG3 /// CSAG2 /// CSAG3 /// CSAG2	CSAG family, member 3 /// CSAG family, member 2 /// CSAG family, member 3 /// CSAG family, member 2	chrX	0.89	0.01
8079237	KIF15	kinesin family member 15	chr3	0.88	9.76e-06
8022711	DSC2	desmocollin 2	chr18	0.88	0.00604
7976402	COX8C	cytochrome c oxidase subunit VIIIC	chr14	0.88	0.0097
8094278	NCAPG	non-SMC condensin I complex, subunit G	chr4	0.87	0.000187
8048205	IGFBP2	insulin-like growth factor binding protein 2, 36kDa	chr2	0.87	0.0018
8017597	---	---	chr17	0.87	0.00564
8068697	MX2	myxovirus (influenza virus) resistance 2 (mouse)	chr21	0.86	1.35e-05
8058238	ALS2CR11	amyotrophic lateral sclerosis 2 (juvenile) chromosome region, candidate 11	chr2	0.86	2.27e-05
7905308	BNIPL	BCL2/adenovirus E1B 19kD interacting protein like	chr1	0.86	0.00199
8068713	MX1	myxovirus (influenza virus) resistance 1, interferon-inducible protein p78 (mouse)	chr21	0.86	0.0042
7950534	WNT11	wingless-type MMTV integration site family, member 11	chr11	0.85	0.00486
8121251	LIN28B	lin-28 homolog B (C. elegans)	chr6	0.85	0.00656
8149955	PBK	PDZ binding kinase	chr8	0.84	0.00238
8101118	CXCL9	chemokine (C-X-C motif) ligand 9	chr4	0.84	0.01
8022817	KLHL14	kelch-like 14 (Drosophila)	chr18	0.83	9.2e-05
8063458	DOK5	docking protein 5	chr20	0.83	0.000995
7933121	CCNYL2	cyclin Y-like 2	chr10	0.83	0.00481
8172395	---	---	chrX	0.82	0.00101
7926715	GPR158	G protein-coupled receptor 158	chr10	0.81	3.43e-07
8045275	---	---	chr2	0.81	0.00015
8124527	HIST1H1B	histone cluster 1, H1b	chr6	0.81	0.00102
7921099	CRABP2	cellular retinoic acid binding protein 2	chr1	0.81	0.00122
8162490	HIATL1	hippocampus abundant transcript-like 1	chr9	0.81	0.00208
8136248	MEST	mesoderm specific transcript homolog (mouse)	chr7	0.81	0.0022
7936734	FGFR2	fibroblast growth factor receptor 2	chr10	0.81	0.00271
8019857	---	---	chr18	0.8	7.94e-06
8102877	CLGN	calmegin	chr4	0.8	0.00101
8039340	TNNT1	troponin T type 1 (skeletal, slow)	chr19	0.79	0.000117
8028311	SPINT2	serine peptidase inhibitor, Kunitz type, 2	chr19	0.79	0.00114
7902553	IFI44	interferon-induced protein 44	chr1	0.79	0.00707
7982663	BUB1B	budding uninhibited by benzimidazoles 1 homolog beta (yeast)	chr15	0.78	5.65e-06
7918223	HENMT1	HEN1 methyltransferase homolog 1 (Arabidopsis)	chr1	0.78	1.06e-05
7956876	LLPH	LLP homolog, long-term synaptic facilitation (Aplysia)	chr12	0.78	2.43e-05
8083941	ECT2	epithelial cell transforming sequence 2 oncogene	chr3	0.78	8.09e-05
7953383	SCARNA10	small Cajal body-specific RNA 10	chr12	0.78	0.000195
8134339	PEG10	paternally expressed 10	chr7	0.78	0.00153
7994109	PLK1	polo-like kinase 1	chr16	0.77	5.21e-06
7979307	DLGAP5	discs, large (Drosophila) homolog-associated protein 5	chr14	0.77	0.000285
7900699	CDC20	cell division cycle 20 homolog (S. cerevisiae)	chr1	0.76	5.6e-05
7927710	CDK1	cyclin-dependent kinase 1	chr10	0.76	0.000363
8038670	KLK5	kallikrein-related peptidase 5	chr19	0.76	0.00409
8124166	MBOAT1	membrane bound O-acyltransferase domain containing 1	chr6	0.76	0.00502
7944834	OR8G2	olfactory receptor, family 8, subfamily G, member 2	chr11	0.76	0.0063
8074168	---	---	chr22	0.75	1.13e-07
7977452	---	---	chr14	0.75	1.72e-07
8089875	POLQ	polymerase (DNA directed), theta	chr3	0.75	1.09e-05
8085754	SGOL1	shugoshin-like 1 (S. pombe)	chr3	0.75	1.92e-05
8156905	TMEFF1 /// MSANTD3-TMEFF1	transmembrane protein with EGF-like and two follistatin-like domains 1 /// MSANTD3-TMEFF1 readthrough	chr9	0.75	0.000776
7939131	WT1-AS	WT1 antisense RNA (non-protein coding)	chr11	0.75	0.00115
8160441	CDKN2A	cyclin-dependent kinase inhibitor 2A	chr9	0.75	0.00141
8058660	---	---	chr2	0.75	0.00516
8043602	NCAPH	non-SMC condensin I complex, subunit H	chr2	0.74	5.86e-07
7951420	---	---	chr11	0.74	2.04e-05
8139788	---	---	chr7	0.74	2.16e-05
7984540	KIF23	kinesin family member 23	chr15	0.74	3.91e-05
8179564	KIFC1	kinesin family member C1	chr6	0.74	4.13e-05
7982358	ARHGAP11A	Rho GTPase activating protein 11A	chr15	0.74	0.000327
8071155	USP18	ubiquitin specific peptidase 18	chr22	0.73	4.61e-05
8056572	SPC25	SPC25, NDC80 kinetochore complex component, homolog (S. cerevisiae)	chr2	0.73	9.24e-05
7929258	KIF11	kinesin family member 11	chr10	0.73	0.000101
8028162	TBCB	tubulin folding cofactor B	chr19	0.73	0.000147
8121405	C6orf183 /// C6orf183	chromosome 6 open reading frame 183 /// chromosome 6 open reading frame 183	chr6	0.73	0.00184
8111017	---	---	chr5	0.73	0.00193
7927915	STOX1	storkhead box 1	chr10	0.73	0.00261
7957032	YEATS4	YEATS domain containing 4	chr12	0.73	0.00854
7906930	NUF2	NUF2, NDC80 kinetochore complex component, homolog (S. cerevisiae)	chr1	0.72	0.000242
8155214	MELK	maternal embryonic leucine zipper kinase	chr9	0.72	0.00162
7967028	RNU4-2	RNA, U4 small nuclear 2	chr12	0.72	0.00222
8053349	LRRTM1	leucine rich repeat transmembrane neuronal 1	chr2	0.72	0.01
7947165	SLC5A12	solute carrier family 5 (sodium/glucose cotransporter), member 12	chr11	0.71	1.22e-05
8124534	HIST1H4L /// HIST2H4B /// HIST4H4 /// HIST2H4A /// HIST1H4E /// HIST1H4B /// HIST1H4H /// HIST1H4C /// HIST1H4J /// HIST1H4K /// HIST1H4F /// HIST1H4D /// HIST1H4A /// HIST1H4I	histone cluster 1, H4l /// histone cluster 2, H4b /// histone cluster 4, H4 /// histone cluster 2, H4a /// histone cluster 1, H4e /// histone cluster 1, H4b /// histone cluster 1, H4h /// histone cluster 1, H4c /// histone cluster 1, H4j /// histone cluster 1, H4k /// histone cluster 1, H4f /// histone cluster 1, H4d /// histone cluster 1, H4a /// histone cluster 1, H4i	chr6	0.71	9.87e-05
8027345	ZNF492	zinc finger protein 492	chr19	0.71	0.000277
8062319	TGIF2	TGFB-induced factor homeobox 2	chr20	0.71	0.000403
8152812	FAM84B	family with sequence similarity 84, member B	chr8	0.71	0.00283
8124437	HIST1H3F /// HIST1H3B /// HIST1H3H /// HIST1H3J /// HIST1H3G /// HIST1H3I /// HIST1H3E /// HIST1H3C /// HIST1H3D /// HIST1H3A	histone cluster 1, H3f /// histone cluster 1, H3b /// histone cluster 1, H3h /// histone cluster 1, H3j /// histone cluster 1, H3g /// histone cluster 1, H3i /// histone cluster 1, H3e /// histone cluster 1, H3c /// histone cluster 1, H3d /// histone cluster 1, H3a	chr6	0.7	2.48e-05
8168794	CENPI	centromere protein I	chrX	0.7	9.15e-05
7896822	AGRN	agrin	chr1	0.7	9.73e-05
7947248	KIF18A	kinesin family member 18A	chr11	0.7	0.000144
7932765	MPP7	membrane protein, palmitoylated 7 (MAGUK p55 subfamily member 7)	chr10	0.7	0.00135
7956949	NUP107	nucleoporin 107kDa	chr12	0.7	0.00159
8044882	EPB41L5	erythrocyte membrane protein band 4.1 like 5	chr2	0.7	0.00168
8093451	---	---	chr4	0.7	0.00622
8063345	SNORD12C	small nucleolar RNA, C/D box 12C	chr20	0.7	0.01
8117583	---	---	chr6	0.69	4.07e-05
7991406	PRC1	protein regulator of cytokinesis 1	chr15	0.69	0.00021
8008784	PRR11	proline rich 11	chr17	0.69	0.00047
7919591	FAM72A /// FAM72B /// FAM72C /// FAM72D	family with sequence similarity 72, member A /// family with sequence similarity 72, member B /// family with sequence similarity 72, member C /// family with sequence similarity 72, member D	chr1	0.69	0.00121
7974404	CDKN3	cyclin-dependent kinase inhibitor 3	chr14	0.69	0.00183
8035249	NR2F6	nuclear receptor subfamily 2, group F, member 6	chr19	0.68	7.49e-05
7963313	GALNT6	UDP-N-acetyl-alpha-D-galactosamine:polypeptide N-acetylgalactosaminyltransferase 6 (GalNAc-T6)	chr12	0.68	0.000191
7914878	CLSPN	claspin	chr1	0.68	0.000267
8109639	PTTG1	pituitary tumor-transforming 1	chr5	0.68	0.000734
7983969	CCNB2	cyclin B2	chr15	0.68	0.0011
7945045	DDX25	DEAD (Asp-Glu-Ala-Asp) box helicase 25	chr11	0.68	0.0023
7955211	DNAJC22	DnaJ (Hsp40) homolog, subfamily C, member 22	chr12	0.68	0.00571
8160559	DDX58	DEAD (Asp-Glu-Ala-Asp) box polypeptide 58	chr9	0.68	0.00842
7913852	C1orf135	chromosome 1 open reading frame 135	chr1	0.67	1.22e-05
8104234	TRIP13	thyroid hormone receptor interactor 13	chr5	0.67	0.000119
8057744	STAT1	signal transducer and activator of transcription 1, 91kDa	chr2	0.67	0.000225
7958895	OAS3	2'-5'-oligoadenylate synthetase 3, 100kDa	chr12	0.67	0.00124
7958913	OAS2	2'-5'-oligoadenylate synthetase 2, 69/71kDa	chr12	0.67	0.0053
8083616	MLF1	myeloid leukemia factor 1	chr3	0.67	0.01
8118669	KIFC1	kinesin family member C1	chr6	0.66	4.28e-05
7955179	TUBA1C	tubulin, alpha 1c	chr12	0.66	6.09e-05
7937020	MKI67	antigen identified by monoclonal antibody Ki-67	chr10	0.66	0.000137
8112327	CKS1B	CDC28 protein kinase regulatory subunit 1B	chr5	0.66	0.000617
8117395	HIST1H2BF /// HIST1H2BC /// HIST1H2BI /// HIST1H2BE /// HIST1H2BG	histone cluster 1, H2bf /// histone cluster 1, H2bc /// histone cluster 1, H2bi /// histone cluster 1, H2be /// histone cluster 1, H2bg	chr6	0.66	0.000796
7907749	TDRD5	tudor domain containing 5	chr1	0.66	0.00159
8026875	SNORA68	small nucleolar RNA, H/ACA box 68	chr19	0.66	0.00193
8167866	PAGE2	P antigen family, member 2 (prostate associated)	chrX	0.66	0.00296
8180034	TAP2	transporter 2, ATP-binding cassette, sub-family B (MDR/TAP)	chr6	0.66	0.00308
8066260	SNORA71C	small nucleolar RNA, H/ACA box 71C	chr20	0.66	0.00372
8052399	BCL11A	B-cell CLL/lymphoma 11A (zinc finger protein)	chr2	0.66	0.00402
8098856	RNF212	ring finger protein 212	chr4	0.66	0.01
8065607	PLAGL2	pleiomorphic adenoma gene-like 2	chr20	0.65	3.25e-05
7923086	ASPM	asp (abnormal spindle) homolog, microcephaly associated (Drosophila)	chr1	0.65	0.000226
8016994	RNF43	ring finger protein 43	chr17	0.65	0.000389
7926896	CKS1B	CDC28 protein kinase regulatory subunit 1B	chr10	0.65	0.000693
8102560	MAD2L1	MAD2 mitotic arrest deficient-like 1 (yeast)	chr4	0.65	0.00227
8020779	DSG2	desmoglein 2	chr18	0.65	0.0083
7929052	IFIT3	interferon-induced protein with tetratricopeptide repeats 3	chr10	0.65	0.00991
8020702	TAF4B	TAF4b RNA polymerase II, TATA box binding protein (TBP)-associated factor, 105kDa	chr18	0.65	0.01
8012958	UBE2S	ubiquitin-conjugating enzyme E2S	chr17	0.64	6.74e-06
7949364	CDCA5	cell division cycle associated 5	chr11	0.64	1.13e-05
8124416	HIST1H3D /// HIST1H2AD /// HIST1H3F /// HIST1H3B /// HIST1H3H /// HIST1H3J /// HIST1H3G /// HIST1H3I /// HIST1H3E /// HIST1H3C /// HIST1H3A	histone cluster 1, H3d /// histone cluster 1, H2ad /// histone cluster 1, H3f /// histone cluster 1, H3b /// histone cluster 1, H3h /// histone cluster 1, H3j /// histone cluster 1, H3g /// histone cluster 1, H3i /// histone cluster 1, H3e /// histone cluster 1, H3c /// histone cluster 1, H3a	chr6	0.64	7.42e-05
8027416	URI1	URI1, prefoldin-like chaperone	chr19	0.64	0.00127
8117589	---	---	chr6	0.64	0.00129
8042830	MTHFD2	methylenetetrahydrofolate dehydrogenase (NADP+ dependent) 2, methenyltetrahydrofolate cyclohydrolase	chr2	0.64	0.00148
8029489	BCAM	basal cell adhesion molecule (Lutheran blood group)	chr19	0.64	0.00183
8178841	TAP2	transporter 2, ATP-binding cassette, sub-family B (MDR/TAP)	chr6	0.64	0.00343
8027793	LSR	lipolysis stimulated lipoprotein receptor	chr19	0.64	0.00415
7953351	NCAPD2	non-SMC condensin I complex, subunit D2	chr12	0.63	2.03e-05
7985873	C15orf42	chromosome 15 open reading frame 42	chr15	0.63	3.15e-05
8124391	HIST1H2AB /// HIST1H2AE	histone cluster 1, H2ab /// histone cluster 1, H2ae	chr6	0.63	3.17e-05
8089372	KIAA1524	KIAA1524	chr3	0.63	0.000316
8013660	ALDOC	aldolase C, fructose-bisphosphate	chr17	0.63	0.00189
7919642	HIST2H2AB	histone cluster 2, H2ab	chr1	0.63	0.00193
8097017	UGT8	UDP glycosyltransferase 8	chr4	0.63	0.00207
8125483	TAP2	transporter 2, ATP-binding cassette, sub-family B (MDR/TAP)	chr6	0.63	0.00401
7999909	GPRC5B	G protein-coupled receptor, family C, group 5, member B	chr16	0.63	0.01
8059838	HJURP	Holliday junction recognition protein	chr2	0.62	6.01e-05
7960340	FOXM1	forkhead box M1	chr12	0.62	8.82e-05
8073192	UQCRFS1	ubiquinol-cytochrome c reductase, Rieske iron-sulfur polypeptide 1	chr22	0.62	0.000244
7947110	E2F8	E2F transcription factor 8	chr11	0.62	0.000247
8060813	MCM8	minichromosome maintenance complex component 8	chr20	0.62	0.00117
7916898	DEPDC1	DEP domain containing 1	chr1	0.62	0.00253
8096361	HERC5	HECT and RLD domain containing E3 ubiquitin protein ligase 5	chr4	0.62	0.00298
8028186	ZNF146	zinc finger protein 146	chr19	0.62	0.00544
8047187	CCDC150	coiled-coil domain containing 150	chr2	0.61	5.09e-05
8026698	BABAM1	BRISC and BRCA1 A complex member 1	chr19	0.61	0.000127
7932118	BEND7	BEN domain containing 7	chr10	0.61	0.000205
8074856	PRAME	preferentially expressed antigen in melanoma	chr22	0.61	0.000223
7948274	UBE2L6	ubiquitin-conjugating enzyme E2L 6	chr11	0.61	0.000382
8167305	EBP	emopamil binding protein (sterol isomerase)	chrX	0.61	0.000421
8028563	MRPS12	mitochondrial ribosomal protein S12	chr19	0.61	0.000783
8077185	APOA1	apolipoprotein A-I	chr11	0.61	0.00199
8171561	SCML2	sex comb on midleg-like 2 (Drosophila)	chrX	0.61	0.0024
8102643	CCNA2	cyclin A2	chr4	0.61	0.00266
7967030	RNU4-1	RNA, U4 small nuclear 1	chr12	0.61	0.00358
7925904	AKR1E2	aldo-keto reductase family 1, member E2	chr10	0.61	0.00483
8022728	DSC1	desmocollin 1	chr18	0.61	0.00698
7963157	RACGAP1	Rac GTPase activating protein 1	chr12	0.6	5.66e-05
8035905	ANKRD27	ankyrin repeat domain 27 (VPS9 domain)	chr19	0.6	0.000225
7923189	KIF14	kinesin family member 14	chr1	0.6	0.000231
8054580	BUB1	budding uninhibited by benzimidazoles 1 homolog (yeast)	chr2	0.6	0.000472
8148276	ZNF572	zinc finger protein 572	chr8	0.6	0.000566
7956978	SLC35E3	solute carrier family 35, member E3	chr12	0.6	0.000623
7961652	---	---	chr12	0.6	0.00109
7904452	FAM72A /// FAM72B /// FAM72D	family with sequence similarity 72, member A /// family with sequence similarity 72, member B /// family with sequence similarity 72, member D	chr1	0.6	0.00168
8169365	TMEM164	transmembrane protein 164	chrX	0.6	0.00181
8108301	KIF20A	kinesin family member 20A	chr5	0.6	0.00195
8156290	CKS2	CDC28 protein kinase regulatory subunit 2	chr9	0.6	0.00218
7909146	FAM72B /// FAM72A /// FAM72D	family with sequence similarity 72, member B /// family with sequence similarity 72, member A /// family with sequence similarity 72, member D	chr1	0.6	0.0027
7915277	MYCL1	v-myc myelocytomatosis viral oncogene homolog 1, lung carcinoma derived (avian)	chr1	0.6	0.00273
7957052	CCT2	chaperonin containing TCP1, subunit 2 (beta)	chr12	0.6	0.00547
7992071	MSLN	mesothelin	chr16	0.6	0.00718
8028744	LGALS17A	Charcot-Leyden crystal protein pseudogene	chr19	0.6	0.01
8062571	FAM83D	family with sequence similarity 83, member D	chr20	0.59	0.000204
8133018	ZNF716	zinc finger protein 716	chr7	0.59	0.000264
8117368	HIST1H4C /// HIST2H4B /// HIST4H4 /// HIST2H4A /// HIST1H4L /// HIST1H4E /// HIST1H4B /// HIST1H4H /// HIST1H4J /// HIST1H4K /// HIST1H4F /// HIST1H4D /// HIST1H4A /// HIST1H4I	histone cluster 1, H4c /// histone cluster 2, H4b /// histone cluster 4, H4 /// histone cluster 2, H4a /// histone cluster 1, H4l /// histone cluster 1, H4e /// histone cluster 1, H4b /// histone cluster 1, H4h /// histone cluster 1, H4j /// histone cluster 1, H4k /// histone cluster 1, H4f /// histone cluster 1, H4d /// histone cluster 1, H4a /// histone cluster 1, H4i	chr6	0.59	0.000386
7913869	STMN1	stathmin 1	chr1	0.59	0.000641
8168146	KIF4A	kinesin family member 4A	chrX	0.59	0.000783
7976621	VRK1	vaccinia related kinase 1	chr14	0.59	0.00123
8053315	LRRTM4	leucine rich repeat transmembrane neuronal 4	chr2	0.59	0.0017
7973724	NYNRIN	NYN domain and retroviral integrase containing	chr14	0.59	0.00204
8027448	DPY19L3	dpy-19-like 3 (C. elegans)	chr19	0.59	0.00301
7915261	TRIT1	tRNA isopentenyltransferase 1	chr1	0.59	0.00426
8172787	SSX2 /// SSX2B	synovial sarcoma, X breakpoint 2 /// synovial sarcoma, X breakpoint 2B	chrX	0.59	0.00547
8063566	RAE1	RAE1 RNA export 1 homolog (S. pombe)	chr20	0.59	0.01
8003583	KIF22	kinesin family member 22	chr16	0.58	7.84e-06
8028851	SHKBP1	SH3KBP1 binding protein 1	chr19	0.58	0.00019
8026051	RNASEH2A	ribonuclease H2, subunit A	chr19	0.58	0.000307
7958031	PARPBP	PARP1 binding protein	chr12	0.58	0.000403
7929078	---	---	chr10	0.58	0.000749
7915926	STIL	SCL/TAL1 interrupting locus	chr1	0.58	0.000765
8039928	FAM72B /// FAM72A /// FAM72D	family with sequence similarity 72, member B /// family with sequence similarity 72, member A /// family with sequence similarity 72, member D	chr1	0.58	0.0024
7982889	NUSAP1	nucleolar and spindle associated protein 1	chr15	0.58	0.00412
8083854	PRKCI	protein kinase C, iota	chr3	0.58	0.0051
8089185	IMPG2	interphotoreceptor matrix proteoglycan 2	chr3	0.58	0.01
7994620	KIF22	kinesin family member 22	chr16	0.57	2.33e-05
8041763	PRKCE	protein kinase C, epsilon	chr2	0.57	7.98e-05
8040712	CENPA /// C2orf18	centromere protein A /// chromosome 2 open reading frame 18	chr2	0.57	8.76e-05
7899407	SMPDL3B	sphingomyelin phosphodiesterase, acid-like 3B	chr1	0.57	0.000166
7964347	TMEM194A	transmembrane protein 194A	chr12	0.57	0.000334
8152668	ATAD2	ATPase family, AAA domain containing 2	chr8	0.57	0.00043
8132318	ANLN	anillin, actin binding protein	chr7	0.57	0.000784
7982757	CASC5	cancer susceptibility candidate 5	chr15	0.57	0.00131
8117426	HIST1H2BH	histone cluster 1, H2bh	chr6	0.57	0.00149
8124413	HIST1H4D /// HIST2H4B /// HIST4H4 /// HIST2H4A /// HIST1H4L /// HIST1H4E /// HIST1H4B /// HIST1H4H /// HIST1H4C /// HIST1H4J /// HIST1H4K /// HIST1H4F /// HIST1H4A /// HIST1H4I	histone cluster 1, H4d /// histone cluster 2, H4b /// histone cluster 4, H4 /// histone cluster 2, H4a /// histone cluster 1, H4l /// histone cluster 1, H4e /// histone cluster 1, H4b /// histone cluster 1, H4h /// histone cluster 1, H4c /// histone cluster 1, H4j /// histone cluster 1, H4k /// histone cluster 1, H4f /// histone cluster 1, H4a /// histone cluster 1, H4i	chr6	0.57	0.00191
8146900	XKR9	XK, Kell blood group complex subunit-related family, member 9	chr8	0.57	0.00196
8067969	CHODL	chondrolectin	chr21	0.57	0.00359
7915590	RNU5F-1	RNA, U5F small nuclear 1	chr1	0.57	0.00446
8060134	KIF1A	kinesin family member 1A	chr2	0.57	0.00644
8028705	TIMM50	translocase of inner mitochondrial membrane 50 homolog (S. cerevisiae)	chr19	0.57	0.00684
7965226	RASSF9	Ras association (RalGDS/AF-6) domain family (N-terminal) member 9	chr12	0.57	0.00979
7915275	---	---	chr1	0.57	0.01
8092073	EIF5A2	eukaryotic translation initiation factor 5A2	chr3	0.57	0.01
8071049	LINC00328	long intergenic non-protein coding RNA 328	---	0.57	0.01
7955736	ESPL1	extra spindle pole bodies homolog 1 (S. cerevisiae)	chr12	0.56	1.74e-05
8063583	RBM38	RNA binding motif protein 38	chr20	0.56	6.11e-05
7948088	SLC25A33	solute carrier family 25 (pyrimidine nucleotide carrier), member 33	chr11	0.56	0.000205
8092654	RPL39L	ribosomal protein L39-like	chr3	0.56	0.000732
7909708	CENPF	centromere protein F, 350/400kDa (mitosin)	chr1	0.56	0.000888
7968484	BRCA2	breast cancer 2, early onset	chr13	0.56	0.00111
8146130	GINS4	GINS complex subunit 4 (Sld5 homolog)	chr8	0.56	0.00136
8124440	---	---	chr6	0.56	0.00191
7932214	ACBD7	acyl-CoA binding domain containing 7	chr10	0.56	0.00201
8014974	TOP2A	topoisomerase (DNA) II alpha 170kDa	chr17	0.56	0.00213
8066905	ZNFX1	zinc finger, NFX1-type containing 1	chr20	0.56	0.00312
7951865	APOA1	apolipoprotein A-I	chr11	0.56	0.0042
8148280	SQLE	squalene epoxidase	chr8	0.56	0.00474
8036436	ZNF607	zinc finger protein 607	chr19	0.56	0.01
7987636	OIP5	Opa interacting protein 5	chr15	0.55	3.43e-05
8129763	FAM54A	family with sequence similarity 54, member A	chr6	0.55	0.00077
8043835	C2orf15 /// MRPL30	chromosome 2 open reading frame 15 /// mitochondrial ribosomal protein L30	chr2	0.55	0.00099
8027642	PDCD2L	programmed cell death 2-like	chr19	0.55	0.00154
8027876	TMEM147	transmembrane protein 147	chr19	0.55	0.00178
8084064	MTHFD2	methylenetetrahydrofolate dehydrogenase (NADP+ dependent) 2, methenyltetrahydrofolate cyclohydrolase	chr3	0.55	0.00209
8053325	---	---	chr2	0.55	0.00219
7934026	DNA2	DNA replication helicase 2 homolog (yeast)	chr10	0.55	0.00265
8007071	CDC6	cell division cycle 6 homolog (S. cerevisiae)	chr17	0.55	0.00701
8062349	RPN2	ribophorin II	chr20	0.55	0.01
8027429	---	---	chr19	0.55	0.01
8039491	UBE2S	ubiquitin-conjugating enzyme E2S	chr19	0.54	3.13e-05
8040578	CENPO	centromere protein O	chr2	0.54	7.39e-05
7959025	RNFT2	ring finger protein, transmembrane 2	chr12	0.54	9.49e-05
8089820	GPR156	G protein-coupled receptor 156	chr3	0.54	0.000135
7919612	HIST2H3C /// HIST2H3A /// HIST2H3D	histone cluster 2, H3c /// histone cluster 2, H3a /// histone cluster 2, H3d	chr1	0.54	0.000274
8066697	SLC35C2	solute carrier family 35, member C2	chr20	0.54	0.000514
8125766	BAK1	BCL2-antagonist/killer 1	chr6	0.54	0.000598
8084423	PSMD2	proteasome (prosome, macropain) 26S subunit, non-ATPase, 2	chr3	0.54	0.000695
8117408	HIST1H2AB /// HIST1H2AE	histone cluster 1, H2ab /// histone cluster 1, H2ae	chr6	0.54	0.000738
7927294	ANTXRL /// ANTXRL	anthrax toxin receptor-like /// anthrax toxin receptor-like	chr10	0.54	0.00126
8097857	MND1	meiotic nuclear divisions 1 homolog (S. cerevisiae)	chr4	0.54	0.00198
8083876	SKIL	SKI-like oncogene	chr3	0.54	0.00225
8047288	SGOL2	shugoshin-like 2 (S. pombe)	chr2	0.54	0.00265
8063000	WFDC2	WAP four-disulfide core domain 2	chr20	0.54	0.00657
8027621	GPI	glucose-6-phosphate isomerase	chr19	0.54	0.0076
7950067	DHCR7	7-dehydrocholesterol reductase	chr11	0.54	0.00907
8091991	MECOM	MDS1 and EVI1 complex locus	chr3	0.54	0.00962
7995292	LOC653562 /// SLC6A10P /// SLC6A8	sodium- and chloride-dependent creatine transporter 1-like /// solute carrier family 6 (neurotransmitter transporter, creatine), member 10, pseudogene /// solute carrier family 6 (neurotransmitter transporter, creatine), member 8	chr16	0.54	0.01
8033767	ZNF560	zinc finger protein 560	chr19	0.54	0.01
7900167	CDCA8	cell division cycle associated 8	chr1	0.53	1.72e-05
8124518	HIST1H2AJ	histone cluster 1, H2aj	chr6	0.53	0.000917
8051670	SOS1	son of sevenless homolog 1 (Drosophila)	chr2	0.53	0.00109
8061471	GINS1	GINS complex subunit 1 (Psf1 homolog)	chr20	0.53	0.00157
7916316	TMEM48	transmembrane protein 48	chr1	0.53	0.00163
8111960	C5orf34	chromosome 5 open reading frame 34	chr5	0.53	0.00165
8152582	DSCC1	defective in sister chromatid cohesion 1 homolog (S. cerevisiae)	chr8	0.53	0.00284
8036557	---	---	chr19	0.53	0.00349
8063697	TH1L	TH1-like (Drosophila)	chr20	0.53	0.00564
7962516	SLC38A1	solute carrier family 38, member 1	chr12	0.53	0.00794
7930208	INA	internexin neuronal intermediate filament protein, alpha	chr10	0.53	0.00818
8150101	---	---	chr8	0.53	0.00975
8167656	MAGED1	melanoma antigen family D, 1	chrX	0.53	0.01
8019709	RNU2-1 /// RNU2-2 /// WDR74	RNA, U2 small nuclear 1 /// RNA, U2 small nuclear 2 /// WD repeat domain 74	---	0.53	0.01
8019631	RNU2-1 /// RNU2-2 /// WDR74	RNA, U2 small nuclear 1 /// RNA, U2 small nuclear 2 /// WD repeat domain 74	---	0.53	0.01
8019633	RNU2-1 /// RNU2-2 /// WDR74	RNA, U2 small nuclear 1 /// RNA, U2 small nuclear 2 /// WD repeat domain 74	---	0.53	0.01
8019635	RNU2-1 /// RNU2-2 /// WDR74	RNA, U2 small nuclear 1 /// RNA, U2 small nuclear 2 /// WD repeat domain 74	---	0.53	0.01
8019637	RNU2-1 /// RNU2-2 /// WDR74	RNA, U2 small nuclear 1 /// RNA, U2 small nuclear 2 /// WD repeat domain 74	---	0.53	0.01
8019639	RNU2-1 /// RNU2-2 /// WDR74	RNA, U2 small nuclear 1 /// RNA, U2 small nuclear 2 /// WD repeat domain 74	---	0.53	0.01
8019641	RNU2-1 /// RNU2-2 /// WDR74	RNA, U2 small nuclear 1 /// RNA, U2 small nuclear 2 /// WD repeat domain 74	---	0.53	0.01
8019703	RNU2-1 /// RNU2-2 /// WDR74	RNA, U2 small nuclear 1 /// RNA, U2 small nuclear 2 /// WD repeat domain 74	---	0.53	0.01
8019705	RNU2-1 /// RNU2-2 /// WDR74	RNA, U2 small nuclear 1 /// RNA, U2 small nuclear 2 /// WD repeat domain 74	---	0.53	0.01
8019707	RNU2-1 /// RNU2-2 /// WDR74	RNA, U2 small nuclear 1 /// RNA, U2 small nuclear 2 /// WD repeat domain 74	---	0.53	0.01
8135943	RN5S242	RNA, 5S ribosomal 242	chr7	0.53	0.01
7901192	RAD54L	RAD54-like (S. cerevisiae)	chr1	0.52	0.000107
8124537	HIST1H3F /// HIST1H3B /// HIST1H3H /// HIST1H3J /// HIST1H3G /// HIST1H3I /// HIST1H3E /// HIST1H3C /// HIST1H3D /// HIST1H3A	histone cluster 1, H3f /// histone cluster 1, H3b /// histone cluster 1, H3h /// histone cluster 1, H3j /// histone cluster 1, H3g /// histone cluster 1, H3i /// histone cluster 1, H3e /// histone cluster 1, H3c /// histone cluster 1, H3d /// histone cluster 1, H3a	chr6	0.52	0.000109
7963631	RARG	retinoic acid receptor, gamma	chr12	0.52	0.000146
7921492	IGSF9	immunoglobulin superfamily, member 9	chr1	0.52	0.000398
8062981	PIGT	phosphatidylinositol glycan anchor biosynthesis, class T	chr20	0.52	0.000825
8092457	ALG3	asparagine-linked glycosylation 3, alpha-1,3- mannosyltransferase homolog (S. cerevisiae)	chr3	0.52	0.00106
8098423	NEIL3	nei endonuclease VIII-like 3 (E. coli)	chr4	0.52	0.00152
7965686	ANKS1B	ankyrin repeat and sterile alpha motif domain containing 1B	chr12	0.52	0.00153
8013671	SPAG5	sperm associated antigen 5	chr17	0.52	0.0019
7942832	C11orf82	chromosome 11 open reading frame 82	chr11	0.52	0.00389
8083709	SMC4	structural maintenance of chromosomes 4	chr3	0.52	0.00417
8074192	---	---	chr22	0.52	0.00491
8016468	HOXB7	homeobox B7	chr17	0.52	0.00495
7900510	CTPS1	CTP synthase 1	chr1	0.52	0.00577
8167728	SSX2 /// SSX2B	synovial sarcoma, X breakpoint 2 /// synovial sarcoma, X breakpoint 2B	chrX	0.52	0.00964
8004201	ALOX12P2 /// ALOX12P2	arachidonate 12-lipoxygenase pseudogene 2 /// arachidonate 12-lipoxygenase pseudogene 2	chr17	0.52	0.01
8092265	MRPL47	mitochondrial ribosomal protein L47	chr3	0.52	0.01
8133042	ZNF679 /// ZNF735	zinc finger protein 679 /// zinc finger protein 735	chr7	0.51	6.67e-05
8027566	CEBPG	CCAAT/enhancer binding protein (C/EBP), gamma	chr19	0.51	0.000119
7955195	TROAP	trophinin associated protein (tastin)	chr12	0.51	0.000164
8138489	CDCA7L	cell division cycle associated 7-like	chr7	0.51	0.00075
8027439	ZNF507	zinc finger protein 507	chr19	0.51	0.000869
7983564	SLC12A1	solute carrier family 12 (sodium/potassium/chloride transporters), member 1	chr15	0.51	0.00119
8117422	HIST1H4F /// HIST2H4B /// HIST4H4 /// HIST2H4A /// HIST1H4L /// HIST1H4E /// HIST1H4B /// HIST1H4H /// HIST1H4C /// HIST1H4J /// HIST1H4K /// HIST1H4D /// HIST1H4A /// HIST1H4I	histone cluster 1, H4f /// histone cluster 2, H4b /// histone cluster 4, H4 /// histone cluster 2, H4a /// histone cluster 1, H4l /// histone cluster 1, H4e /// histone cluster 1, H4b /// histone cluster 1, H4h /// histone cluster 1, H4c /// histone cluster 1, H4j /// histone cluster 1, H4k /// histone cluster 1, H4d /// histone cluster 1, H4a /// histone cluster 1, H4i	chr6	0.51	0.00199
8148158	WDR67	WD repeat domain 67	chr8	0.51	0.0021
8105828	CCNB1	cyclin B1	chr5	0.51	0.00377
7917976	SASS6	spindle assembly 6 homolog (C. elegans)	chr1	0.51	0.00583
7942332	FOLR1	folate receptor 1 (adult)	chr11	0.51	0.00858
8019737	KPNA2	karyopherin alpha 2 (RAG cohort 1, importin alpha 1)	chr17	0.51	0.01
8040223	RRM2	ribonucleotide reductase M2	chr2	0.51	0.01
8143327	PARP12	poly (ADP-ribose) polymerase family, member 12	chr7	0.51	0.01
8156982	SMC2	structural maintenance of chromosomes 2	chr9	0.51	0.01
7915286	PPT1	palmitoyl-protein thioesterase 1	chr1	0.51	0.01
8116932	PHACTR1	phosphatase and actin regulator 1	chr6	0.5	0.00016
8065612	C20orf112	chromosome 20 open reading frame 112	chr20	0.5	0.000735
8045674	LYPD6	LY6/PLAUR domain containing 6	chr2	0.5	0.00114
8043718	COX5B	cytochrome c oxidase subunit Vb	chr2	0.5	0.00136
8027932	COX6B1	cytochrome c oxidase subunit VIb polypeptide 1 (ubiquitous)	chr19	0.5	0.00521
7957072	RAB3IP	RAB3A interacting protein (rabin3)	chr12	0.5	0.00524
8056999	TTC30A	tetratricopeptide repeat domain 30A	chr2	0.5	0.0056
7900216	AKIRIN1	akirin 1	chr1	0.5	0.00577
7974372	GPR137C	G protein-coupled receptor 137C	chr14	0.5	0.00623
8028674	SUPT5H	suppressor of Ty 5 homolog (S. cerevisiae)	chr19	0.5	0.0081
8021984	YES1	v-yes-1 Yamaguchi sarcoma viral oncogene homolog 1	chr18	0.5	0.00831
8009417	KPNA2	karyopherin alpha 2 (RAG cohort 1, importin alpha 1)	chr17	0.5	0.01
8100231	TEC	tec protein tyrosine kinase	chr4	0.5	0.01
8036309	ZFP82	zinc finger protein 82 homolog (mouse)	chr19	0.5	0.01
8063283	CSE1L	CSE1 chromosome segregation 1-like (yeast)	chr20	0.5	0.01
8036242	ALKBH6	alkB, alkylation repair homolog 6 (E. coli)	chr19	0.49	0.000305
8035868	---	---	chr19	0.49	0.000339
7914851	CLSPN	claspin	chr1	0.49	0.000532
7897460	SLC25A33	solute carrier family 25 (pyrimidine nucleotide carrier), member 33	chr1	0.49	0.000544
8084439	EIF4G1	eukaryotic translation initiation factor 4 gamma, 1	chr3	0.49	0.000561
7926259	MCM10	minichromosome maintenance complex component 10	chr10	0.49	0.00142
7970513	SKA3	spindle and kinetochore associated complex subunit 3	chr13	0.49	0.00181
8173506	ERCC6L	excision repair cross-complementing rodent repair deficiency, complementation group 6-like	chrX	0.49	0.00201
7905938	SLC50A1	solute carrier family 50 (sugar transporter), member 1	chr1	0.49	0.00255
8097356	PLK4	polo-like kinase 4	chr4	0.49	0.00293
7985829	FANCI	Fanconi anemia, complementation group I	chr15	0.49	0.003
8034122	SPC24	SPC24, NDC80 kinetochore complex component, homolog (S. cerevisiae)	chr19	0.49	0.00305
7982287	ARHGAP11B /// LOC100288637	Rho GTPase activating protein 11B /// OTU domain containing 7A pseudogene	chr15	0.49	0.00324
8038347	TEAD2	TEA domain family member 2	chr19	0.49	0.0036
8050240	ODC1	ornithine decarboxylase 1	chr2	0.49	0.00408
7968563	RFC3	replication factor C (activator 1) 3, 38kDa	chr13	0.49	0.00573
7899480	SNORA73A /// SNHG3	small nucleolar RNA, H/ACA box 73A /// small nucleolar RNA host gene 3 (non-protein coding)	chr1	0.49	0.00611
7901765	HOOK1	hook homolog 1 (Drosophila)	chr1	0.49	0.01
8042356	MEIS1	Meis homeobox 1	chr2	0.49	0.01
8027390	POP4	processing of precursor 4, ribonuclease P/MRP subunit (S. cerevisiae)	chr19	0.49	0.01
8053909	SNRNP200	small nuclear ribonucleoprotein 200kDa (U5)	chr2	0.48	0.000125
7967117	OASL	2'-5'-oligoadenylate synthetase-like	chr12	0.48	0.00052
8172531	PRAF2	PRA1 domain family, member 2	chrX	0.48	0.00116
7910997	EXO1	exonuclease 1	chr1	0.48	0.0017
7926821	MASTL	microtubule associated serine/threonine kinase-like	chr10	0.48	0.00201
8069933	MIS18A	MIS18 kinetochore protein homolog A (S. pombe)	chr21	0.48	0.00236
8124622	ZNF311	zinc finger protein 311	chr6	0.48	0.00247
8178275	ZNF311	zinc finger protein 311	chr6	0.48	0.00247
8145418	CDCA2	cell division cycle associated 2	chr8	0.48	0.00258
7956026	GDF11	growth differentiation factor 11	chr12	0.48	0.00259
7967386	MPHOSPH9	M-phase phosphoprotein 9	chr12	0.48	0.0032
8135688	NAA38	N(alpha)-acetyltransferase 38, NatC auxiliary subunit	chr7	0.48	0.00458
8092534	TMEM41A	transmembrane protein 41A	chr3	0.48	0.00656
8019831	CLUL1	clusterin-like 1 (retinal)	chr18	0.48	0.00969
7903565	GPSM2	G-protein signaling modulator 2	chr1	0.48	0.01
7902810	LMO4	LIM domain only 4	chr1	0.48	0.01
7947189	CCDC34	coiled-coil domain containing 34	chr11	0.47	0.000315
7919589	HIST2H3C /// HIST2H3A /// HIST2H3D	histone cluster 2, H3c /// histone cluster 2, H3a /// histone cluster 2, H3d	chr1	0.47	0.000672
7973727	NYNRIN	NYN domain and retroviral integrase containing	chr14	0.47	0.00124
8026679	USE1	unconventional SNARE in the ER 1 homolog (S. cerevisiae)	chr19	0.47	0.00198
7898833	KDM1A	lysine (K)-specific demethylase 1A	chr1	0.47	0.00313
7899821	KIAA1522	KIAA1522	chr1	0.47	0.00322
8093500	TACC3	transforming, acidic coiled-coil containing protein 3	chr4	0.47	0.00425
7907466	DARS2	aspartyl-tRNA synthetase 2, mitochondrial	chr1	0.47	0.00601
7947184	---	---	chr11	0.47	0.00605
7912198	ENO1	enolase 1, (alpha)	chr1	0.47	0.00702
8117377	HIST1H1E	histone cluster 1, H1e	chr6	0.47	0.00904
7982290	---	---	chr15	0.47	0.01
7969374	BORA	bora, aurora kinase A activator	chr13	0.47	0.01
8070286	DSCR4	Down syndrome critical region gene 4	chr21	0.47	0.01
8010260	BIRC5	baculoviral IAP repeat containing 5	chr17	0.46	8.07e-05
7964145	TIMELESS	timeless homolog (Drosophila)	chr12	0.46	0.000377
8022514	TMEM241	transmembrane protein 241	chr18	0.46	0.00073
8180255	---	---	---	0.46	0.00281
8180321	---	---	---	0.46	0.00281
7900792	PTPRF	protein tyrosine phosphatase, receptor type, F	chr1	0.46	0.00355
8084045	MFN1	mitofusin 1	chr3	0.46	0.00359
8028084	APLP1	amyloid beta (A4) precursor-like protein 1	chr19	0.46	0.00379
8045319	---	---	chr2	0.46	0.00559
8055234	---	---	chr2	0.46	0.00559
8175696	GABRA3	gamma-aminobutyric acid (GABA) A receptor, alpha 3	chrX	0.46	0.0061
8038213	HSD17B14	hydroxysteroid (17-beta) dehydrogenase 14	chr19	0.46	0.00692
8148270	NDUFB9	NADH dehydrogenase (ubiquinone) 1 beta subcomplex, 9, 22kDa	chr8	0.46	0.00861
8063509	C20orf43	chromosome 20 open reading frame 43	chr20	0.46	0.00932
7978123	PSME2	proteasome (prosome, macropain) activator subunit 2 (PA28 beta)	chr14	0.46	0.01
7975136	FUT8	fucosyltransferase 8 (alpha (1,6) fucosyltransferase)	chr14	0.46	0.01
8065963	CPNE1	copine I	chr20	0.46	0.01
8092905	LSG1	large subunit GTPase 1 homolog (S. cerevisiae)	chr3	0.46	0.01
8014755	SNORA21	small nucleolar RNA, H/ACA box 21	chr17	0.46	0.01
8031576	NLRP4	NLR family, pyrin domain containing 4	chr19	0.46	0.01
7905154	C1orf51	chromosome 1 open reading frame 51	chr1	0.46	0.01
8131890	STK31	serine/threonine kinase 31	chr7	0.45	0.00048
7966878	MIR1178 /// CIT	microRNA 1178 /// citron (rho-interacting, serine/threonine kinase 21)	chr12	0.45	0.000501
7905085	HIST2H3C /// HIST2H3A /// HIST2H3D	histone cluster 2, H3c /// histone cluster 2, H3a /// histone cluster 2, H3d	chr1	0.45	0.000927
7919614	HIST2H3C /// HIST2H3A /// HIST2H3D	histone cluster 2, H3c /// histone cluster 2, H3a /// histone cluster 2, H3d	chr1	0.45	0.000927
8040440	GEN1	Gen endonuclease homolog 1 (Drosophila)	chr2	0.45	0.00147
8034806	DDX39A	DEAD (Asp-Glu-Ala-Asp) box polypeptide 39A	chr19	0.45	0.00152
7924096	NEK2	NIMA (never in mitosis gene a)-related kinase 2	chr1	0.45	0.00285
7900030	EIF2C1	eukaryotic translation initiation factor 2C, 1	chr1	0.45	0.00516
8036689	FBXO27	F-box protein 27	chr19	0.45	0.00662
8084067	ACTL6A	actin-like 6A	chr3	0.45	0.00843
8027323	ZNF257	zinc finger protein 257	chr19	0.45	0.01
7900576	PPIH	peptidylprolyl isomerase H (cyclophilin H)	chr1	0.45	0.01
7905918	EFNA3	ephrin-A3	chr1	0.45	0.01
8101945	H2AFZ	H2A histone family, member Z	chr4	0.45	0.01
7982792	RAD51	RAD51 homolog (S. cerevisiae)	chr15	0.44	0.00028
7960702	CDCA3	cell division cycle associated 3	chr12	0.44	0.000891
7948397	---	---	chr11	0.44	0.00101
7949956	MTL5	metallothionein-like 5, testis-specific (tesmin)	chr11	0.44	0.00164
7900833	KDM4A	lysine (K)-specific demethylase 4A	chr1	0.44	0.00194
8168436	---	---	chrX	0.44	0.00197
8061685	TM9SF4	transmembrane 9 superfamily protein member 4	chr20	0.44	0.00203
8084360	ABCF3	ATP-binding cassette, sub-family F (GCN20), member 3	chr3	0.44	0.00218
8034920	ILVBL	ilvB (bacterial acetolactate synthase)-like	chr19	0.44	0.00251
8028286	SIPA1L3	signal-induced proliferation-associated 1 like 3	chr19	0.44	0.00532
7948904	SNORD28	small nucleolar RNA, C/D box 28	chr11	0.44	0.00556
8034974	EPHX3	epoxide hydrolase 3	chr19	0.44	0.00567
7947375	CCDC73	coiled-coil domain containing 73	chr11	0.44	0.00586
7957338	SYT1	synaptotagmin I	chr12	0.44	0.00601
8162850	TEX10	testis expressed 10	chr9	0.44	0.00823
8157671	OR1J4	olfactory receptor, family 1, subfamily J, member 4	chr9	0.44	0.00924
7971866	DIAPH3	diaphanous homolog 3 (Drosophila)	chr13	0.44	0.00996
7916432	DHCR24	24-dehydrocholesterol reductase	chr1	0.44	0.01
7933760	CCDC6	coiled-coil domain containing 6	chr10	0.44	0.01
8027996	PSENEN	presenilin enhancer 2 homolog (C. elegans)	chr19	0.44	0.01
8092552	IGF2BP2	insulin-like growth factor 2 mRNA binding protein 2	chr3	0.44	0.01
8167103	CDK16	cyclin-dependent kinase 16	chrX	0.44	0.01
7957043	FRS2	fibroblast growth factor receptor substrate 2	chr12	0.44	0.01
8157668	OR1J2	olfactory receptor, family 1, subfamily J, member 2	chr9	0.44	0.01
8084607	SENP2	SUMO1/sentrin/SMT3 specific peptidase 2	chr3	0.44	0.01
8063755	FAM217B	family with sequence similarity 217, member B	chr20	0.44	0.01
8071042	LOC100288884	uncharacterized LOC100288884	chr21	0.43	0.000345
7980338	IRF2BPL	interferon regulatory factor 2 binding protein-like	chr14	0.43	0.00106
8035236	HAUS8	HAUS augmin-like complex, subunit 8	chr19	0.43	0.00106
8083221	PBX2 /// PBX2P1	pre-B-cell leukemia homeobox 2 /// pre-B-cell leukemia homeobox 2 pseudogene 1	chr3	0.43	0.0012
7911359	NOC2L	nucleolar complex associated 2 homolog (S. cerevisiae)	chr1	0.43	0.0016
7944510	RNF26	ring finger protein 26	chr11	0.43	0.00175
7924712	LIN9	lin-9 homolog (C. elegans)	chr1	0.43	0.00228
8124521	HIST1H4J /// HIST2H4B /// HIST4H4 /// HIST2H4A /// HIST1H4L /// HIST1H4E /// HIST1H4B /// HIST1H4H /// HIST1H4C /// HIST1H4K /// HIST1H4F /// HIST1H4D /// HIST1H4A /// HIST1H4I	histone cluster 1, H4j /// histone cluster 2, H4b /// histone cluster 4, H4 /// histone cluster 2, H4a /// histone cluster 1, H4l /// histone cluster 1, H4e /// histone cluster 1, H4b /// histone cluster 1, H4h /// histone cluster 1, H4c /// histone cluster 1, H4k /// histone cluster 1, H4f /// histone cluster 1, H4d /// histone cluster 1, H4a /// histone cluster 1, H4i	chr6	0.43	0.00408
7923426	UBE2T	ubiquitin-conjugating enzyme E2T (putative)	chr1	0.43	0.00446
8034940	NOTCH3	notch 3	chr19	0.43	0.00452
8175193	---	---	chrX	0.43	0.00523
7942342	INPPL1	inositol polyphosphate phosphatase-like 1	chr11	0.43	0.00601
8068898	HIST1H2BK /// H2BFS	histone cluster 1, H2bk /// H2B histone family, member S (pseudogene)	chr21	0.43	0.00761
8154151	PPAPDC2	phosphatidic acid phosphatase type 2 domain containing 2	chr9	0.43	0.00764
7899455	PHACTR4	phosphatase and actin regulator 4	chr1	0.43	0.00789
8065738	AHCY	adenosylhomocysteinase	chr20	0.43	0.00816
8058256	---	---	chr2	0.43	0.00845
8045664	LYPD6B	LY6/PLAUR domain containing 6B	chr2	0.43	0.01
8122933	TIAM2 /// LOC100505519	T-cell lymphoma invasion and metastasis 2 /// uncharacterized LOC100505519	chr6	0.43	0.01
8046408	PDK1	pyruvate dehydrogenase kinase, isozyme 1	chr2	0.43	0.01
8121532	WISP3	WNT1 inducible signaling pathway protein 3	chr6	0.43	0.01
8150356	RNF5 /// RNF5P1	ring finger protein 5, E3 ubiquitin protein ligase /// ring finger protein 5, E3 ubiquitin protein ligase pseudogene 1	chr8	0.43	0.01
7953218	RAD51AP1	RAD51 associated protein 1	chr12	0.42	0.000304
7948267	TIMM10	translocase of inner mitochondrial membrane 10 homolog (yeast)	chr11	0.42	0.00041
7950492	KLHL35	kelch-like 35 (Drosophila)	chr11	0.42	0.000738
8035156	CHERP	calcium homeostasis endoplasmic reticulum protein	chr19	0.42	0.00117
8084232	YEATS2	YEATS domain containing 2	chr3	0.42	0.00139
8092763	RNU1-20P	RNA, U1 small nuclear 20, pseudogene	chr3	0.42	0.00212
7956524	PIP4K2C	phosphatidylinositol-5-phosphate 4-kinase, type II, gamma	chr12	0.42	0.00217
7986068	BLM	Bloom syndrome, RecQ helicase-like	chr15	0.42	0.00264
8053142	RTKN	rhotekin	chr2	0.42	0.00283
7959777	BRI3BP	BRI3 binding protein	chr12	0.42	0.00374
7907156	XCL1	chemokine (C motif) ligand 1	chr1	0.42	0.00418
8113385	SLCO6A1	solute carrier organic anion transporter family, member 6A1	chr5	0.42	0.00459
7904314	TTF2	transcription termination factor, RNA polymerase II	chr1	0.42	0.00537
8050102	CMPK2	cytidine monophosphate (UMP-CMP) kinase 2, mitochondrial	chr2	0.42	0.00545
8063315	DDX27	DEAD (Asp-Glu-Ala-Asp) box polypeptide 27	chr20	0.42	0.00682
8069135	C21orf90 /// C21orf90	chromosome 21 open reading frame 90 /// chromosome 21 open reading frame 90	chr21	0.42	0.00712
7900468	NFYC	nuclear transcription factor Y, gamma	chr1	0.42	0.00738
7957167	TMEM19	transmembrane protein 19	chr12	0.42	0.00746
8102076	CENPE	centromere protein E, 312kDa	chr4	0.42	0.00818
8020653	CABYR	calcium binding tyrosine-(Y)-phosphorylation regulated	chr18	0.42	0.00897
7915472	SLC2A1	solute carrier family 2 (facilitated glucose transporter), member 1	chr1	0.42	0.01
8062326	C20orf24	chromosome 20 open reading frame 24	chr20	0.42	0.01
7905079	HIST2H2AA3 /// HIST2H2AA4	histone cluster 2, H2aa3 /// histone cluster 2, H2aa4	chr1	0.42	0.01
7919619	HIST2H2AA3 /// HIST2H2AA4	histone cluster 2, H2aa3 /// histone cluster 2, H2aa4	chr1	0.42	0.01
8145603	PNOC	prepronociceptin	chr8	0.42	0.01
7922391	CENPL	centromere protein L	chr1	0.42	0.01
7953547	ATN1	atrophin 1	chr12	0.42	0.01
8047086	NAB1	NGFI-A binding protein 1 (EGR1 binding protein 1)	chr2	0.42	0.01
8135697	ANKRD7	ankyrin repeat domain 7	chr7	0.41	0.00203
8035880	UQCRFS1	ubiquinol-cytochrome c reductase, Rieske iron-sulfur polypeptide 1	chr19	0.41	0.00253
8086660	PRSS50	protease, serine, 50	chr3	0.41	0.00386
8121559	---	---	chr6	0.41	0.00463
8035177	SLC35E1	solute carrier family 35, member E1	chr19	0.41	0.00669
8069880	TIAM1	T-cell lymphoma invasion and metastasis 1	chr21	0.41	0.00769
8120239	TMEM14A	transmembrane protein 14A	chr6	0.41	0.00934
7984330	ZWILCH	Zwilch, kinetochore associated, homolog (Drosophila)	chr15	0.41	0.00959
7917283	MCOLN2	mucolipin 2	chr1	0.41	0.01
8093578	NAT8L	N-acetyltransferase 8-like (GCN5-related, putative)	chr4	0.41	0.01
8059878	IQCA1	IQ motif containing with AAA domain 1	chr2	0.41	0.01
8101622	TECR	trans-2,3-enoyl-CoA reductase	chr4	0.41	0.01
8132960	---	---	chr7	0.41	0.01
7915408	FOXJ3	forkhead box J3	chr1	0.41	0.01
8036938	ADCK4	aarF domain containing kinase 4	chr19	0.41	0.01
7980576	---	---	chr14	0.4	4.73e-05
8081079	---	---	chr3	0.4	5.51e-05
8027510	C19orf40	chromosome 19 open reading frame 40	chr19	0.4	0.000115
8036276	POLR2I	polymerase (RNA) II (DNA directed) polypeptide I, 14.5kDa	chr19	0.4	0.000966
8062206	ROMO1	reactive oxygen species modulator 1	chr20	0.4	0.0017
8084323	DVL3	dishevelled, dsh homolog 3 (Drosophila)	chr3	0.4	0.00347
7915543	SLC6A9	solute carrier family 6 (neurotransmitter transporter, glycine), member 9	chr1	0.4	0.00496
8180348	---	---	---	0.4	0.00536
8129943	---	---	chr6	0.4	0.00565
8179184	DDR1 /// MIR4640	discoidin domain receptor tyrosine kinase 1 /// microRNA 4640	chr6	0.4	0.00604
8117900	DDR1 /// MIR4640	discoidin domain receptor tyrosine kinase 1 /// microRNA 4640	chr6	0.4	0.00606
7912928	SDHB	succinate dehydrogenase complex, subunit B, iron sulfur (Ip)	chr1	0.4	0.00609
8160786	KIAA1161	KIAA1161	chr9	0.4	0.00648
7933855	RTKN2	rhotekin 2	chr10	0.4	0.00739
8177867	DDR1 /// MIR4640	discoidin domain receptor tyrosine kinase 1 /// microRNA 4640	chr6	0.4	0.00755
8070632	CBS	cystathionine-beta-synthase	chr21	0.4	0.00757
8144082	C7orf13 /// C7orf13	chromosome 7 open reading frame 13 /// chromosome 7 open reading frame 13	chr7	0.4	0.00802
8063835	LSM14B	LSM14B, SCD6 homolog B (S. cerevisiae)	chr20	0.4	0.00827
8148124	MTBP	Mdm2, transformed 3T3 cell double minute 2, p53 binding protein (mouse) binding protein, 104kDa	chr8	0.4	0.00873
8051030	SLC5A6	solute carrier family 5 (sodium-dependent vitamin transporter), member 6	chr2	0.4	0.01
8132580	YKT6	YKT6 v-SNARE homolog (S. cerevisiae)	chr7	0.4	0.01
8139482	SNORA5A	small nucleolar RNA, H/ACA box 5A	chr7	0.4	0.01
7959751	ZNF664	zinc finger protein 664	chr12	0.4	0.01
8084838	HRASLS	HRAS-like suppressor	chr3	0.4	0.01
8067288	SLMO2-ATP5E /// ATP5E	SLMO2-ATP5E readthrough /// ATP synthase, H+ transporting, mitochondrial F1 complex, epsilon subunit	chr20	0.4	0.01
7977294	ZBTB42	zinc finger and BTB domain containing 42	chr14	0.4	0.01
7981481	C14orf2	chromosome 14 open reading frame 2	chr14	0.4	0.01
7946113	OR56A5	olfactory receptor, family 56, subfamily A, member 5	chr11	0.4	0.01
8166723	XK	X-linked Kx blood group (McLeod syndrome)	chrX	0.4	0.01
8118535	RNF5 /// RNF5P1	ring finger protein 5, E3 ubiquitin protein ligase /// ring finger protein 5, E3 ubiquitin protein ligase pseudogene 1	chr6	0.4	0.01
8179472	RNF5 /// RNF5P1	ring finger protein 5, E3 ubiquitin protein ligase /// ring finger protein 5, E3 ubiquitin protein ligase pseudogene 1	chr6	0.4	0.01
8083282	HPS3	Hermansky-Pudlak syndrome 3	chr3	0.4	0.01
7938293	SNORA45	small nucleolar RNA, H/ACA box 45	chr11	0.39	0.000656
8012403	AURKB	aurora kinase B	chr17	0.39	0.00144
8175629	MAGEA11	melanoma antigen family A, 11	---	0.39	0.00299
8027908	RBM42	RNA binding motif protein 42	chr19	0.39	0.00304
8114425	CDC25C	cell division cycle 25 homolog C (S. pombe)	chr5	0.39	0.00361
8132387	POU6F2	POU class 6 homeobox 2	chr7	0.39	0.00377
8061919	CBFA2T2	core-binding factor, runt domain, alpha subunit 2; translocated to, 2	chr20	0.39	0.00382
8151434	---	---	chr8	0.39	0.00416
8036656	FBXO17 /// SARS2	F-box protein 17 /// seryl-tRNA synthetase 2, mitochondrial	chr19	0.39	0.00426
7899502	RNU11	RNA, U11 small nuclear	chr1	0.39	0.0043
8061706	POFUT1	protein O-fucosyltransferase 1	chr20	0.39	0.00474
8036143	U2AF1L4	U2 small nuclear RNA auxiliary factor 1-like 4	chr19	0.39	0.0048
7903632	CELSR2	cadherin, EGF LAG seven-pass G-type receptor 2 (flamingo homolog, Drosophila)	chr1	0.39	0.00536
8041900	---	---	chr2	0.39	0.00583
7899134	CEP85	centrosomal protein 85kDa	chr1	0.39	0.00584
8054740	PAX8	paired box 8	chr2	0.39	0.0093
8054702	CKAP2L	cytoskeleton associated protein 2-like	chr2	0.39	0.01
8026315	PKN1	protein kinase N1	chr19	0.39	0.01
8052882	ADD2	adducin 2 (beta)	chr2	0.39	0.01
8007454	RND2	Rho family GTPase 2	chr17	0.39	0.01
7905088	HIST2H2AC	histone cluster 2, H2ac	chr1	0.39	0.01
8170921	PLXNA3	plexin A3	chrX	0.39	0.01
8084035	ZNF639	zinc finger protein 639	chr3	0.39	0.01
7985213	CHRNA5	cholinergic receptor, nicotinic, alpha 5 (neuronal)	chr15	0.39	0.01
8124540	---	---	chr6	0.38	0.000853
7963741	SMUG1	single-strand-selective monofunctional uracil-DNA glycosylase 1	chr12	0.38	0.0013
8027332	ZNF729	zinc finger protein 729	chr19	0.38	0.00148
7977450	OR11H12 /// OR11H1 /// OR11H2	olfactory receptor, family 11, subfamily H, member 12 /// olfactory receptor, family 11, subfamily H, member 1 /// olfactory receptor, family 11, subfamily H, member 2	chr14	0.38	0.00181
8050894	KIF3C	kinesin family member 3C	chr2	0.38	0.00269
8125360	PBX2	pre-B-cell leukemia homeobox 2	chr6	0.38	0.003
8075785	FOXRED2	FAD-dependent oxidoreductase domain containing 2	chr22	0.38	0.00304
7953409	PTMS	parathymosin	chr12	0.38	0.00336
8117598	HIST2H4B /// HIST4H4 /// HIST2H4A /// HIST1H4L /// HIST1H4E /// HIST1H4B /// HIST1H4H /// HIST1H4C /// HIST1H4J /// HIST1H4K /// HIST1H4F /// HIST1H4D /// HIST1H4A /// HIST1H4I	histone cluster 2, H4b /// histone cluster 4, H4 /// histone cluster 2, H4a /// histone cluster 1, H4l /// histone cluster 1, H4e /// histone cluster 1, H4b /// histone cluster 1, H4h /// histone cluster 1, H4c /// histone cluster 1, H4j /// histone cluster 1, H4k /// histone cluster 1, H4f /// histone cluster 1, H4d /// histone cluster 1, H4a /// histone cluster 1, H4i	chr6	0.38	0.00352
7896817	ISG15	ISG15 ubiquitin-like modifier	chr1	0.38	0.00462
8117429	HIST1H2BI /// HIST1H2BC /// HIST1H2BE /// HIST1H2BF /// HIST1H2BG	histone cluster 1, H2bi /// histone cluster 1, H2bc /// histone cluster 1, H2be /// histone cluster 1, H2bf /// histone cluster 1, H2bg	chr6	0.38	0.00527
8043018	---	---	chr2	0.38	0.00573
7981013	PRIMA1	proline rich membrane anchor 1	chr14	0.38	0.00662
7913256	DDOST	dolichyl-diphosphooligosaccharide--protein glycosyltransferase	chr1	0.38	0.00665
8034783	LPHN1	latrophilin 1	chr19	0.38	0.00781
8126153	KCNK5	potassium channel, subfamily K, member 5	chr6	0.38	0.00808
8110803	CLPTM1L	CLPTM1-like	chr5	0.38	0.00854
8141395	MCM7	minichromosome maintenance complex component 7	chr7	0.38	0.00891
8026751	FAM125A	family with sequence similarity 125, member A	chr19	0.38	0.00944
8052250	MTIF2	mitochondrial translational initiation factor 2	chr2	0.38	0.01
8026341	TECR	trans-2,3-enoyl-CoA reductase	chr19	0.38	0.01
8029784	HIF3A	hypoxia inducible factor 3, alpha subunit	chr19	0.38	0.01
8107098	---	---	chr5	0.38	0.01
7914216	SNORA16A /// SNHG12	small nucleolar RNA, H/ACA box 16A /// small nucleolar RNA host gene 12 (non-protein coding)	chr1	0.38	0.01
7992594	CCNF	cyclin F	chr16	0.37	0.000561
7981911	MKRN3	makorin ring finger protein 3	chr15	0.37	0.00089
7961381	GPR19	G protein-coupled receptor 19	chr12	0.37	0.00112
7911854	TP73-AS1	TP73 antisense RNA 1 (non-protein coding)	chr1	0.37	0.00224
7977472	OR11H12 /// OR11H1 /// OR11H2	olfactory receptor, family 11, subfamily H, member 12 /// olfactory receptor, family 11, subfamily H, member 1 /// olfactory receptor, family 11, subfamily H, member 2	chr14	0.37	0.00224
7938788	LDHC	lactate dehydrogenase C	chr11	0.37	0.00232
8124430	HIST1H1D	histone cluster 1, H1d	chr6	0.37	0.00425
7897044	PRKCZ	protein kinase C, zeta	chr1	0.37	0.00518
7955019	ARID2	AT rich interactive domain 2 (ARID, RFX-like)	chr12	0.37	0.00629
7915045	C1orf109	chromosome 1 open reading frame 109	chr1	0.37	0.00662
7915485	EBNA1BP2	EBNA1 binding protein 2	chr1	0.37	0.00746
8075164	CHEK2	checkpoint kinase 2	chr22	0.37	0.00749
7934553	ZNF503	zinc finger protein 503	chr10	0.37	0.0075
7897561	KIF1B	kinesin family member 1B	chr1	0.37	0.00756
7980044	PNMA1	paraneoplastic Ma antigen 1	chr14	0.37	0.00829
8035836	ZNF99	zinc finger protein 99	chr19	0.37	0.00953
7969243	CKAP2	cytoskeleton associated protein 2	chr13	0.37	0.00999
8021187	SKA1	spindle and kinetochore associated complex subunit 1	chr18	0.37	0.01
8028645	MED29	mediator complex subunit 29	chr19	0.37	0.01
8062190	SPAG4	sperm associated antigen 4	chr20	0.37	0.01
8177120	LOC100233156 /// TEKT4P2 /// MAFIP	tektin 4 pseudogene /// tektin 4 pseudogene 2 /// MAFF interacting protein (pseudogene)	chrY	0.37	0.01
8134745	STAG3	stromal antigen 3	chr7	0.37	0.01
8139794	---	---	chr7	0.37	0.01
7938559	RASSF10	Ras association (RalGDS/AF-6) domain family (N-terminal) member 10	chr11	0.36	0.00185
7994813	ZNF48	zinc finger protein 48	chr16	0.36	0.00191
8137219	C7orf29	chromosome 7 open reading frame 29	chr7	0.36	0.00329
7956287	NAB2	NGFI-A binding protein 2 (EGR1 binding protein 2)	chr12	0.36	0.00353
7900911	DPH2	DPH2 homolog (S. cerevisiae)	chr1	0.36	0.00375
8157229	---	---	chr9	0.36	0.00392
7966938	GCN1L1	GCN1 general control of amino-acid synthesis 1-like 1 (yeast)	chr12	0.36	0.00402
7915718	TESK2	testis-specific kinase 2	chr1	0.36	0.00491
7955502	SCN8A	sodium channel, voltage gated, type VIII, alpha subunit	chr12	0.36	0.00618
8077731	FANCD2	Fanconi anemia, complementation group D2	chr3	0.36	0.00627
7938295	SNORA3 /// RPL27A	small nucleolar RNA, H/ACA box 3 /// ribosomal protein L27a	chr11	0.36	0.00648
8116658	FAM50B	family with sequence similarity 50, member B	chr6	0.36	0.0071
8074773	YDJC	YdjC homolog (bacterial)	chr22	0.36	0.00729
8044961	RNU4ATAC	RNA, U4atac small nuclear (U12-dependent splicing)	chr2	0.36	0.00819
7967412	CDK2AP1	cyclin-dependent kinase 2 associated protein 1	chr12	0.36	0.01
7918813	NRAS	neuroblastoma RAS viral (v-ras) oncogene homolog	chr1	0.36	0.01
7963935	DNAJC14	DnaJ (Hsp40) homolog, subfamily C, member 14	chr12	0.36	0.01
8092640	RFC4	replication factor C (activator 1) 4, 37kDa	chr3	0.36	0.01
7900438	ZNF643	zinc finger protein 643	chr1	0.36	0.01
7932211	---	---	chr10	0.36	0.01
8117995	TUBB	tubulin, beta class I	chr6	0.36	0.01
8177858	TUBB	tubulin, beta class I	chr6	0.36	0.01
8179174	TUBB	tubulin, beta class I	chr6	0.36	0.01
8084016	PIK3CA	phosphoinositide-3-kinase, catalytic, alpha polypeptide	chr3	0.36	0.01
7972981	OR11H12 /// OR11H1 /// OR11H2	olfactory receptor, family 11, subfamily H, member 12 /// olfactory receptor, family 11, subfamily H, member 1 /// olfactory receptor, family 11, subfamily H, member 2	chr14	0.35	0.00221
8074194	OR11H12 /// OR11H1 /// OR11H2	olfactory receptor, family 11, subfamily H, member 12 /// olfactory receptor, family 11, subfamily H, member 1 /// olfactory receptor, family 11, subfamily H, member 2	chr22	0.35	0.00221
7978114	EMC9	ER membrane protein complex subunit 9	chr14	0.35	0.00274
7941478	SART1	squamous cell carcinoma antigen recognized by T cells	chr11	0.35	0.00308
8175947	HCFC1	host cell factor C1 (VP16-accessory protein)	chrX	0.35	0.00338
8082350	MCM2	minichromosome maintenance complex component 2	chr3	0.35	0.00451
8180294	---	---	---	0.35	0.00535
8068350	FLJ46020	FLJ46020 protein	chr21	0.35	0.0055
8125172	EHMT2	euchromatic histone-lysine N-methyltransferase 2	chr6	0.35	0.00579
8179884	EHMT2	euchromatic histone-lysine N-methyltransferase 2	chr6	0.35	0.00579
7986627	---	---	chr15	0.35	0.00587
8116846	---	---	chr6	0.35	0.00886
7898957	RCAN3	RCAN family member 3	chr1	0.35	0.00945
7942453	PLEKHB1	pleckstrin homology domain containing, family B (evectins) member 1	chr11	0.35	0.01
7915468	CCDC23	coiled-coil domain containing 23	chr1	0.35	0.01
8066964	---	---	chr20	0.35	0.01
8026954	PIK3R2	phosphoinositide-3-kinase, regulatory subunit 2 (beta)	chr19	0.35	0.01
7916219	SELRC1	Sel1 repeat containing 1	chr1	0.35	0.01
8028583	PAK4	p21 protein (Cdc42/Rac)-activated kinase 4	chr19	0.35	0.01
8152628	DERL1	derlin 1	chr8	0.35	0.01
8073474	MEI1	meiosis inhibitor 1	chr22	0.35	0.01
8172905	HSD17B10	hydroxysteroid (17-beta) dehydrogenase 10	chrX	0.35	0.01
8025895	PRKCSH	protein kinase C substrate 80K-H	chr19	0.35	0.01
7958455	UNG	uracil-DNA glycosylase	chr12	0.35	0.01
8159734	CACNA1B	calcium channel, voltage-dependent, N type, alpha 1B subunit	chr9	0.34	0.00307
8109484	KIF4B	kinesin family member 4B	chr5	0.34	0.00409
7994637	MAZ	MYC-associated zinc finger protein (purine-binding transcription factor)	chr16	0.34	0.00496
8028119	WDR62	WD repeat domain 62	chr19	0.34	0.00579
7912956	RCC2	regulator of chromosome condensation 2	chr1	0.34	0.00611
7948910	SNORD25 /// SNHG1	small nucleolar RNA, C/D box 25 /// small nucleolar RNA host gene 1 (non-protein coding)	chr11	0.34	0.00675
8026579	TMEM38A	transmembrane protein 38A	chr19	0.34	0.00687
7896937	ATAD3C	ATPase family, AAA domain containing 3C	chr1	0.34	0.00694
8133345	WBSCR22	Williams Beuren syndrome chromosome region 22	chr7	0.34	0.00762
8063814	LSM14B	LSM14B, SCD6 homolog B (S. cerevisiae)	chr20	0.34	0.0082
8108447	CXXC5	CXXC finger protein 5	chr5	0.34	0.01
8104504	---	---	chr5	0.34	0.01
8027139	RFXANK	regulatory factor X-associated ankyrin-containing protein	chr19	0.34	0.01
8045208	POTEF /// POTEE	POTE ankyrin domain family, member F /// POTE ankyrin domain family, member E	chr2	0.34	0.01
8070689	HSF2BP	heat shock transcription factor 2 binding protein	chr21	0.34	0.01
8071044	LOC100233156 /// TEKT4P2 /// MAFIP	tektin 4 pseudogene /// tektin 4 pseudogene 2 /// MAFF interacting protein (pseudogene)	---	0.34	0.01
8040774	AGBL5	ATP/GTP binding protein-like 5	chr2	0.34	0.01
7980496	CEP128	centrosomal protein 128kDa	chr14	0.34	0.01
8050336	E2F6	E2F transcription factor 6	chr2	0.34	0.01
8175811	FAM58A /// FAM58BP	family with sequence similarity 58, member A /// family with sequence similarity 58, member B, pseudogene	chrX	0.34	0.01
7973545	DCAF11	DDB1 and CUL4 associated factor 11	chr14	0.34	0.01
8117330	HIST1H3A /// HIST1H3F /// HIST1H3B /// HIST1H3H /// HIST1H3J /// HIST1H3G /// HIST1H3I /// HIST1H3E /// HIST1H3C /// HIST1H3D	histone cluster 1, H3a /// histone cluster 1, H3f /// histone cluster 1, H3b /// histone cluster 1, H3h /// histone cluster 1, H3j /// histone cluster 1, H3g /// histone cluster 1, H3i /// histone cluster 1, H3e /// histone cluster 1, H3c /// histone cluster 1, H3d	chr6	0.34	0.01
8047372	NDUFB3	NADH dehydrogenase (ubiquinone) 1 beta subcomplex, 3, 12kDa	chr2	0.34	0.01
8133112	---	---	chr7	0.33	0.00307
8004416	CHRNB1	cholinergic receptor, nicotinic, beta 1 (muscle)	chr17	0.33	0.00366
7939613	MAPK8IP1 /// LOC644172	mitogen-activated protein kinase 8 interacting protein 1 /// mitogen-activated protein kinase 8 interacting protein 1 pseudogene	chr11	0.33	0.00431
8180315	---	---	---	0.33	0.00464
7941364	PCNXL3	pecanex-like 3 (Drosophila)	chr11	0.33	0.00517
8084982	LOC152217	uncharacterized LOC152217	chr3	0.33	0.00582
8157362	ZNF618	zinc finger protein 618	chr9	0.33	0.00615
8178561	ABHD16A	abhydrolase domain containing 16A	chr6	0.33	0.00914
7956443	MARS	methionyl-tRNA synthetase	chr12	0.33	0.01
8063893	ADRM1	adhesion regulating molecule 1	chr20	0.33	0.01
7956401	SHMT2	serine hydroxymethyltransferase 2 (mitochondrial)	chr12	0.33	0.01
8144153	NCAPG2	non-SMC condensin II complex, subunit G2	chr7	0.33	0.01
8172460	SLC35A2	solute carrier family 35 (UDP-galactose transporter), member A2	chrX	0.33	0.01
7965094	E2F7	E2F transcription factor 7	chr12	0.33	0.01
7964234	ATP5B	ATP synthase, H+ transporting, mitochondrial F1 complex, beta polypeptide	chr12	0.33	0.01
8053890	STARD7	StAR-related lipid transfer (START) domain containing 7	chr2	0.33	0.01
8043657	CNNM4	cyclin M4	chr2	0.33	0.01
8053158	MOGS	mannosyl-oligosaccharide glucosidase	chr2	0.33	0.01
8063097	PCIF1	PDX1 C-terminal inhibiting factor 1	chr20	0.33	0.01
8036207	NFKBID	nuclear factor of kappa light polypeptide gene enhancer in B-cells inhibitor, delta	chr19	0.33	0.01
8125017	ABHD16A	abhydrolase domain containing 16A	chr6	0.33	0.01
8027348	ZNF730	zinc finger protein 730	chr19	0.33	0.01
8133326	POM121C /// POM121B /// POM121	POM121 transmembrane nucleoporin C /// POM121 transmembrane nucleoporin B (pseudogene) /// POM121 transmembrane nucleoporin	chr7	0.33	0.01
8028552	NFKBIB	nuclear factor of kappa light polypeptide gene enhancer in B-cells inhibitor, beta	chr19	0.33	0.01
7897339	CAMTA1	calmodulin binding transcription activator 1	chr1	0.32	0.00126
7936809	FAM24B-CUZD1 /// FAM24B /// CUZD1	FAM24B-CUZD1 readthrough /// family with sequence similarity 24, member B /// CUB and zona pellucida-like domains 1	chr10	0.32	0.002
7981273	CCDC85C	coiled-coil domain containing 85C	chr14	0.32	0.00538
7911444	UBE2J2	ubiquitin-conjugating enzyme E2, J2	chr1	0.32	0.00552
7959786	AACS	acetoacetyl-CoA synthetase	chr12	0.32	0.00591
8039937	GLTPD1	glycolipid transfer protein domain containing 1	chr1	0.32	0.00656
7978132	IPO4	importin 4	chr14	0.32	0.00733
8061725	ASXL1	additional sex combs like 1 (Drosophila)	chr20	0.32	0.00778
8062890	PABPC1L	poly(A) binding protein, cytoplasmic 1-like	chr20	0.32	0.00797
8043393	THNSL2	threonine synthase-like 2 (S. cerevisiae)	chr2	0.32	0.00815
8180205	---	---	---	0.32	0.00865
8100310	---	---	chr4	0.32	0.01
8119444	FOXP4	forkhead box P4	chr6	0.32	0.01
8045804	---	---	chr2	0.32	0.01
8088893	---	---	chr3	0.32	0.01
7950142	CLPB	ClpB caseinolytic peptidase B homolog (E. coli)	chr11	0.32	0.01
8040843	CAD	carbamoyl-phosphate synthetase 2, aspartate transcarbamylase, and dihydroorotase	chr2	0.32	0.01
8162260	---	---	chr9	0.32	0.01
8035023	AKAP8L	A kinase (PRKA) anchor protein 8-like	chr19	0.32	0.01
7926807	PDSS1	prenyl (decaprenyl) diphosphate synthase, subunit 1	chr10	0.32	0.01
8128383	COQ3	coenzyme Q3 homolog, methyltransferase (S. cerevisiae)	chr6	0.32	0.01
8095262	REST	RE1-silencing transcription factor	chr4	0.32	0.01
7958275	POLR3B	polymerase (RNA) III (DNA directed) polypeptide B	chr12	0.32	0.01
8167347	SUV39H1	suppressor of variegation 3-9 homolog 1 (Drosophila)	chrX	0.32	0.01
8041225	EHD3	EH-domain containing 3	chr2	0.32	0.01
8180313	---	---	---	0.32	0.01
7898278	SPEN	spen homolog, transcriptional regulator (Drosophila)	chr1	0.32	0.01
7959282	RNF34	ring finger protein 34, E3 ubiquitin protein ligase	chr12	0.32	0.01
8054297	CHST10	carbohydrate sulfotransferase 10	chr2	0.32	0.01
8075493	PATZ1	POZ (BTB) and AT hook containing zinc finger 1	chr22	0.32	0.01
8036954	---	---	chr19	0.31	0.00164
7952179	H2AFX	H2A histone family, member X	chr11	0.31	0.00411
7927924	---	---	chr10	0.31	0.00613
7940561	FEN1	flap structure-specific endonuclease 1	chr11	0.31	0.00651
8078805	ACVR2B	activin A receptor, type IIB	chr3	0.31	0.00684
7955331	SMARCD1	SWI/SNF related, matrix associated, actin dependent regulator of chromatin, subfamily d, member 1	chr12	0.31	0.00765
7933707	ZWINT	ZW10 interactor	chr10	0.31	0.00899
7914141	RPA2	replication protein A2, 32kDa	chr1	0.31	0.00991
7994655	C16orf53	chromosome 16 open reading frame 53	chr16	0.31	0.01
8081779	ZDHHC23	zinc finger, DHHC-type containing 23	chr3	0.31	0.01
7921133	HDGF	hepatoma-derived growth factor	chr1	0.31	0.01
8172561	PRICKLE3	prickle homolog 3 (Drosophila)	chrX	0.31	0.01
7904211	VANGL1	vang-like 1 (van gogh, Drosophila)	chr1	0.31	0.01
7994756	PPP4C	protein phosphatase 4, catalytic subunit	chr16	0.31	0.01
8082663	NUDT16P1	nudix (nucleoside diphosphate linked moiety X)-type motif 16 pseudogene 1	chr3	0.31	0.01
8133477	GTF2IRD1	GTF2I repeat domain containing 1	chr7	0.31	0.01
7960689	MLF2	myeloid leukemia factor 2	chr12	0.31	0.01
8036525	MAP4K1	mitogen-activated protein kinase kinase kinase kinase 1	chr19	0.31	0.01
8026982	MPV17L2	MPV17 mitochondrial membrane protein-like 2	chr19	0.31	0.01
8036483	YIF1B	Yip1 interacting factor homolog B (S. cerevisiae)	chr19	0.31	0.01
7963235	CSRNP2	cysteine-serine-rich nuclear protein 2	chr12	0.31	0.01
8016033	FAM171A2	family with sequence similarity 171, member A2	chr17	0.31	0.01
7955606	C12orf44	chromosome 12 open reading frame 44	chr12	0.3	0.00599
8022642	---	---	chr18	0.3	0.00608
8087513	TRAIP	TRAF interacting protein	chr3	0.3	0.00711
8026250	DCAF15	DDB1 and CUL4 associated factor 15	chr19	0.3	0.00818
7941350	PCNXL3	pecanex-like 3 (Drosophila)	chr11	0.3	0.00844
8117543	HIST1H2AH	histone cluster 1, H2ah	chr6	0.3	0.00919
8036956	C19orf54	chromosome 19 open reading frame 54	chr19	0.3	0.00967
8144388	FAM90A7P	family with sequence similarity 90, member A7, pseudogene	chr8	0.3	0.01
7992722	PRSS21	protease, serine, 21 (testisin)	chr16	0.3	0.01
8050060	TSSC1	tumor suppressing subtransferable candidate 1	chr2	0.3	0.01
8018849	TK1	thymidine kinase 1, soluble	chr17	0.3	0.01
8137352	SLC4A2	solute carrier family 4, anion exchanger, member 2 (erythrocyte membrane protein band 3-like 1)	chr7	0.3	0.01
8003773	---	---	chr17	0.3	0.01
8036613	HNRNPL	heterogeneous nuclear ribonucleoprotein L	chr19	0.3	0.01
8065798	GGT7	gamma-glutamyltransferase 7	chr20	0.3	0.01
8034843	NDUFB7	NADH dehydrogenase (ubiquinone) 1 beta subcomplex, 7, 18kDa	chr19	0.3	0.01
8035958	CEP89	centrosomal protein 89kDa	chr19	0.3	0.01
8124086	---	---	chr6	0.29	0.00305
8051989	ATP6V1E2 /// FLJ41757	ATPase, H+ transporting, lysosomal 31kDa, V1 subunit E2 /// uncharacterized LOC440862	chr2	0.29	0.00511
7901087	HPDL	4-hydroxyphenylpyruvate dioxygenase-like	chr1	0.29	0.00527
8128087	GABRR1	gamma-aminobutyric acid (GABA) A receptor, rho 1	chr6	0.29	0.00573
7959408	KNTC1	kinetochore associated 1	chr12	0.29	0.00587
7918300	PSRC1	proline/serine-rich coiled-coil 1	chr1	0.29	0.00611
8117580	HIST1H2AI /// HIST1H2AH /// HIST1H2AG /// HIST1H2AM /// HIST1H2AL /// HIST1H2AK	histone cluster 1, H2ai /// histone cluster 1, H2ah /// histone cluster 1, H2ag /// histone cluster 1, H2am /// histone cluster 1, H2al /// histone cluster 1, H2ak	chr6	0.29	0.00686
7914994	---	---	chr1	0.29	0.00843
7898102	KAZN	kazrin, periplakin interacting protein	chr1	0.29	0.00885
7973584	RNF31	ring finger protein 31	chr14	0.29	0.00967
7896878	B3GALT6	UDP-Gal:betaGal beta 1,3-galactosyltransferase polypeptide 6	chr1	0.29	0.00999
7899392	SCARNA1	small Cajal body-specific RNA 1	chr1	0.29	0.01
7920707	FAM189B	family with sequence similarity 189, member B	chr1	0.29	0.01
7911337	---	---	chr1	0.29	0.01
7973871	---	---	chr14	0.29	0.01
8165696	---	---	chrM	0.29	0.01
8059139	ATG9A	autophagy related 9A	chr2	0.29	0.01
7964687	C12orf56	chromosome 12 open reading frame 56	chr12	0.29	0.01
7916425	TTC22	tetratricopeptide repeat domain 22	chr1	0.29	0.01
8026821	MAP1S	microtubule-associated protein 1S	chr19	0.29	0.01
8093230	KIAA0226	KIAA0226	chr3	0.29	0.01
8007497	---	---	chr17	0.29	0.01
7998886	PKMYT1	protein kinase, membrane associated tyrosine/threonine 1	chr16	0.28	0.00883
8151252	---	---	chr8	0.28	0.00967
8026155	NACC1	nucleus accumbens associated 1, BEN and BTB (POZ) domain containing	chr19	0.28	0.01
8140319	HIP1	huntingtin interacting protein 1	chr7	0.28	0.01
8010673	SLC25A10	solute carrier family 25 (mitochondrial carrier; dicarboxylate transporter), member 10	chr17	0.28	0.01
8117608	HIST1H2AL /// HIST1H2AH /// HIST1H2AG /// HIST1H2AM /// HIST1H2AK /// HIST1H2AI	histone cluster 1, H2al /// histone cluster 1, H2ah /// histone cluster 1, H2ag /// histone cluster 1, H2am /// histone cluster 1, H2ak /// histone cluster 1, H2ai	chr6	0.28	0.01
8012270	---	---	chr17	0.28	0.01
7953733	ZNF705A	zinc finger protein 705A	chr12	0.28	0.01
7949206	MEN1	multiple endocrine neoplasia I	chr11	0.28	0.01
8065200	---	---	chr20	0.28	0.01
8065693	NECAB3	N-terminal EF-hand calcium binding protein 3	chr20	0.28	0.01
7950420	LIPT2	lipoyl(octanoyl) transferase 2 (putative)	chr11	0.28	0.01
7896917	GLTPD1	glycolipid transfer protein domain containing 1	chr1	0.28	0.01
8026724	MRPL34	mitochondrial ribosomal protein L34	chr19	0.28	0.01
8139782	---	---	chr7	0.27	0.00358
7913644	E2F2	E2F transcription factor 2	chr1	0.27	0.00701
7949619	SLC29A2	solute carrier family 29 (nucleoside transporters), member 2	chr11	0.27	0.01
7900654	TMEM125	transmembrane protein 125	chr1	0.27	0.01
8161026	C9orf100	chromosome 9 open reading frame 100	chr9	0.27	0.01
7967588	DHX37	DEAH (Asp-Glu-Ala-His) box polypeptide 37	chr12	0.27	0.01
7962384	ADAMTS20	ADAM metallopeptidase with thrombospondin type 1 motif, 20	chr12	0.27	0.01
8139468	TBRG4 /// SNORA5B	transforming growth factor beta regulator 4 /// small nucleolar RNA, H/ACA box 5B	chr7	0.27	0.01
7900087	ADPRHL2	ADP-ribosylhydrolase like 2	chr1	0.27	0.01
7964300	ZBTB39	zinc finger and BTB domain containing 39	chr12	0.27	0.01
7932721	LRRC37A6P	leucine rich repeat containing 37, member A6, pseudogene	chr10	0.26	0.01
8028016	C19orf55	chromosome 19 open reading frame 55	chr19	0.26	0.01
8133089	ZNF92	zinc finger protein 92	chr7	0.26	0.01
8057817	---	---	chr2	0.26	0.01
7924863	C1orf145 /// C1orf145	chromosome 1 open reading frame 145 /// chromosome 1 open reading frame 145	chr1	0.26	0.01
8117389	HIST1H2BE /// HIST1H2BC /// HIST1H2BI /// HIST1H2BF /// HIST1H2BG	histone cluster 1, H2be /// histone cluster 1, H2bc /// histone cluster 1, H2bi /// histone cluster 1, H2bf /// histone cluster 1, H2bg	chr6	0.26	0.01
7899519	YTHDF2	YTH domain family, member 2	chr1	0.25	0.00975
7914003	C1orf172	chromosome 1 open reading frame 172	chr1	0.25	0.01
8030429	BCL2L12	BCL2-like 12 (proline rich)	chr19	0.25	0.01
8055948	---	---	chr2	0.24	0.00173
7919852	---	---	chr1	0.24	0.00204
7940600	INCENP	inner centromere protein antigens 135/155kDa	chr11	0.24	0.01
8072382	OSBP2	oxysterol binding protein 2	chr22	0.24	0.01
8081354	---	---	chr3	0.24	0.01
8138440	---	---	chr7	0.24	0.01
8167152	ZNF157	zinc finger protein 157	chrX	0.24	0.01
7998367	RPUSD1	RNA pseudouridylate synthase domain containing 1	chr16	0.23	0.01
8026013	WDR83	WD repeat domain 83	chr19	0.23	0.01
8124036	---	---	chr6	0.22	0.00139
8174045	---	---	chrX	0.22	0.00193
8146332	---	---	chr8	0.21	0.008
7903292	---	---	chr1	0.21	0.01
7952914	CCDC77	coiled-coil domain containing 77	chr12	0.21	0.01
8081456	---	---	chr3	0.19	0.00493
8165653	ND1	NADH dehydrogenase, subunit 1 (complex I)	chrM	0.19	0.01
8113427	---	---	chr5	0.19	0.01
8069608	---	---	chr21	0.18	0.00175
8084124	---	---	chr3	0.17	0.01
8046014	---	---	chr2	0.17	0.01
8067197	TRNAL42P	transfer RNA leucine 42 (anticodon UAA) pseudogene	chr20	0.16	0.01
7958844	---	---	chr12	0.15	0.00869
8066818	---	---	chr20	0.15	0.01
7926563	---	---	chr10	0.15	0.01
7935690	---	---	chr10	0.14	0.00841
7963201	---	---	chr12	0.13	0.01
8174373	---	---	chrX	-0.19	0.01
8124158	---	---	chr6	-0.23	0.01
8127177	KLHL31	kelch-like 31 (Drosophila)	chr6	-0.25	0.01
7904431	---	---	chr1	-0.25	0.01
8145244	TNFRSF10C	tumor necrosis factor receptor superfamily, member 10c, decoy without an intracellular domain	chr8	-0.25	0.01
8168387	FAM226B	family with sequence similarity 226, member B (non-protein coding)	chrX	-0.26	0.01
8138310	DGKB	diacylglycerol kinase, beta 90kDa	chr7	-0.26	0.01
7908730	---	---	chr1	-0.26	0.01
8077370	SETMAR	SET domain and mariner transposase fusion gene	chr3	-0.27	0.01
7996807	ZFP90	zinc finger protein 90 homolog (mouse)	chr16	-0.27	0.01
8029399	ZNF226	zinc finger protein 226	chr19	-0.27	0.01
8115978	UIMC1	ubiquitin interaction motif containing 1	chr5	-0.27	0.01
8149296	PINX1	PIN2/TERF1 interacting, telomerase inhibitor 1	chr8	-0.27	0.01
8076851	ALG12	asparagine-linked glycosylation 12, alpha-1,6-mannosyltransferase homolog (S. cerevisiae)	chr22	-0.27	0.01
8113733	CEP120	centrosomal protein 120kDa	chr5	-0.28	0.01
8086572	FYCO1	FYVE and coiled-coil domain containing 1	chr3	-0.28	0.01
7988286	SPG11	spastic paraplegia 11 (autosomal recessive)	chr15	-0.28	0.01
8130071	LOC729176 /// C15orf29	chromosome 15 open reading frame 29 pseudogene /// chromosome 15 open reading frame 29	chr6	-0.28	0.01
8165945	LOC100288814	uncharacterized LOC100288814	chrX	-0.28	0.01
8056983	LOC100130691	uncharacterized LOC100130691	chr2	-0.29	0.00941
8108238	SMAD5	SMAD family member 5	chr5	-0.29	0.01
8064900	---	---	chr20	-0.29	0.01
8042157	---	---	chr2	-0.29	0.01
8126184	KIF6	kinesin family member 6	chr6	-0.29	0.01
8046502	SCRN3	secernin 3	chr2	-0.29	0.01
8080685	SLMAP /// LOC100287789	sarcolemma associated protein /// uncharacterized LOC100287789	chr3	-0.3	0.00561
8110472	ZFP2	zinc finger protein 2 homolog (mouse)	chr5	-0.3	0.00991
7987981	UBR1	ubiquitin protein ligase E3 component n-recognin 1	chr15	-0.3	0.01
8029321	ZNF283	zinc finger protein 283	chr19	-0.3	0.01
8098101	---	---	chr4	-0.3	0.01
8157450	ORM2	orosomucoid 2	chr9	-0.3	0.01
7986675	NIPA1	non imprinted in Prader-Willi/Angelman syndrome 1	chr15	-0.31	0.00697
8070141	CRYZL1	crystallin, zeta (quinone reductase)-like 1	chr21	-0.31	0.00785
8155530	KGFLP2 /// KGFLP1	keratinocyte growth factor-like protein 2 /// fibroblast growth factor 7 pseudogene	chr9	-0.31	0.01
7911307	LOC100653267 /// LOC100653047 /// LOC100289034 /// LOC100287195 /// MGC2752	uncharacterized LOC100653267 /// 60S ribosomal protein L23a-like /// ribosomal protein L23a pseudogene /// 60S ribosomal protein L23a-like /// CENPB DNA-binding domains containing 1 pseudogene	chr1	-0.31	0.01
8156253	FAM75A1 /// FAM75A3 /// FAM75A4 /// FAM75A5 /// FAM75A6 /// FAM75A7 /// FAM75C1 /// FAM75C2 /// FAM75A2	family with sequence similarity 75, member A1 /// family with sequence similarity 75, member A3 /// family with sequence similarity 75, member A4 /// family with sequence similarity 75, member A5 /// family with sequence similarity 75, member A6 /// family with sequence similarity 75, member A7 /// family with sequence similarity 75, member C1 /// family with sequence similarity 75, member C2 ///…	chr9	-0.31	0.01
8032730	EEF2	eukaryotic translation elongation factor 2	chr19	-0.31	0.01
8055606	GTDC1	glycosyltransferase-like domain containing 1	chr2	-0.31	0.01
8041197	YPEL5	yippee-like 5 (Drosophila)	chr2	-0.31	0.01
8006112	NSRP1	nuclear speckle splicing regulatory protein 1	chr17	-0.31	0.01
7974816	SLC38A6	solute carrier family 38, member 6	chr14	-0.31	0.01
8148978	ERICH1	glutamate-rich 1	chr8	-0.32	0.00248
7970194	MCF2L	MCF.2 cell line derived transforming sequence-like	chr13	-0.32	0.00801
8075897	C1QTNF6	C1q and tumor necrosis factor related protein 6	chr22	-0.32	0.00887
7989013	RSL24D1	ribosomal L24 domain containing 1	chr15	-0.32	0.01
7979886	RPL7AP6	ribosomal protein L7a pseudogene 6	chr14	-0.32	0.01
8132013	CHN2	chimerin (chimaerin) 2	chr7	-0.32	0.01
8001477	AMFR	autocrine motility factor receptor, E3 ubiquitin protein ligase	chr16	-0.32	0.01
8039680	ZNF671	zinc finger protein 671	chr19	-0.32	0.01
8044793	STEAP3	STEAP family member 3, metalloreductase	chr2	-0.32	0.01
7995655	FTO	fat mass and obesity associated	chr16	-0.32	0.01
8029435	---	---	chr19	-0.32	0.01
8128683	SNX3	sorting nexin 3	chr6	-0.32	0.01
7990429	FAM219B	family with sequence similarity 219, member B	chr15	-0.32	0.01
8001876	NAE1	NEDD8 activating enzyme E1 subunit 1	chr16	-0.32	0.01
8023735	TMX3	thioredoxin-related transmembrane protein 3	chr18	-0.32	0.01
8155414	---	---	chr9	-0.32	0.01
8161384	---	---	chr9	-0.32	0.01
8048108	---	---	chr2	-0.32	0.01
8073875	TRMU	tRNA 5-methylaminomethyl-2-thiouridylate methyltransferase	chr22	-0.33	0.00732
8001423	RPGRIP1L	RPGRIP1-like	chr16	-0.33	0.00765
7911038	ZNF238	zinc finger protein 238	chr1	-0.33	0.00805
7967881	MPHOSPH8	M-phase phosphoprotein 8	chr13	-0.33	0.00892
8035896	TSHZ3	teashirt zinc finger homeobox 3	chr19	-0.33	0.01
7943051	NAALAD2	N-acetylated alpha-linked acidic dipeptidase 2	chr11	-0.33	0.01
8056977	NFE2L2	nuclear factor (erythroid-derived 2)-like 2	chr2	-0.33	0.01
8073799	ATXN10	ataxin 10	chr22	-0.33	0.01
7950864	ME3	malic enzyme 3, NADP(+)-dependent, mitochondrial	chr11	-0.33	0.01
7982002	SNORD116-27	small nucleolar RNA, C/D box 116-27	chr15	-0.33	0.01
8160531	C9orf72	chromosome 9 open reading frame 72	chr9	-0.33	0.01
8150165	FUT10	fucosyltransferase 10 (alpha (1,3) fucosyltransferase)	chr8	-0.33	0.01
8116227	CLK4	CDC-like kinase 4	chr5	-0.33	0.01
8002102	---	---	chr16	-0.33	0.01
7945182	APLP2	amyloid beta (A4) precursor-like protein 2	chr11	-0.33	0.01
8144315	ARHGEF10	Rho guanine nucleotide exchange factor (GEF) 10	chr8	-0.33	0.01
8093096	TCTEX1D2	Tctex1 domain containing 2	chr3	-0.33	0.01
8021374	RSL24D1P11	ribosomal L24 domain containing 1 pseudogene 11	chr18	-0.34	0.00183
7996860	TMCO7	transmembrane and coiled-coil domains 7	chr16	-0.34	0.00418
8154662	LOC100506422	putative deoxyuridine 5'-triphosphate nucleotidohydrolase-like protein FLJ16323	chr9	-0.34	0.00531
8120880	TPBG	trophoblast glycoprotein	chr6	-0.34	0.00689
8112033	ARL15	ADP-ribosylation factor-like 15	chr5	-0.34	0.00736
7942839	PCF11	PCF11, cleavage and polyadenylation factor subunit, homolog (S. cerevisiae)	chr11	-0.34	0.00737
8095360	GCOM2	GRINL1B complex locus 2, pseudogene	chr4	-0.34	0.0077
8119088	CDKN1A	cyclin-dependent kinase inhibitor 1A (p21, Cip1)	chr6	-0.34	0.00913
7924499	TLR5	toll-like receptor 5	chr1	-0.34	0.00993
8134318	CASD1	CAS1 domain containing 1	chr7	-0.34	0.00993
8023646	BCL2	B-cell CLL/lymphoma 2	chr18	-0.34	0.01
8157605	STOM	stomatin	chr9	-0.34	0.01
7943498	DYNC2H1	dynein, cytoplasmic 2, heavy chain 1	chr11	-0.34	0.01
7984155	SNX1	sorting nexin 1	chr15	-0.34	0.01
8003722	SRR	serine racemase	chr17	-0.34	0.01
8098637	CYP4V2	cytochrome P450, family 4, subfamily V, polypeptide 2	chr4	-0.34	0.01
8073068	APOBEC3C	apolipoprotein B mRNA editing enzyme, catalytic polypeptide-like 3C	chr22	-0.34	0.01
8078386	GPD1L	glycerol-3-phosphate dehydrogenase 1-like	chr3	-0.34	0.01
8078690	DLEC1	deleted in lung and esophageal cancer 1	chr3	-0.34	0.01
8144281	---	---	chr8	-0.34	0.01
8144557	MSRA	methionine sulfoxide reductase A	chr8	-0.35	0.00306
8110032	CREBRF	CREB3 regulatory factor	chr5	-0.35	0.00418
8109426	FLJ38109	uncharacterized LOC386627	chr5	-0.35	0.00621
7995583	CHD9	chromodomain helicase DNA binding protein 9	chr16	-0.35	0.00637
8170027	DDX26B	DEAD/H (Asp-Glu-Ala-Asp/His) box polypeptide 26B	chrX	-0.35	0.00723
8171373	GEMIN8	gem (nuclear organelle) associated protein 8	chrX	-0.35	0.00771
8133938	CROT	carnitine O-octanoyltransferase	chr7	-0.35	0.00778
8108753	PCDHB15	protocadherin beta 15	chr5	-0.35	0.01
8162276	NFIL3	nuclear factor, interleukin 3 regulated	chr9	-0.35	0.01
8096753	HADH	hydroxyacyl-CoA dehydrogenase	chr4	-0.35	0.01
7984213	---	---	chr15	-0.35	0.01
7970655	MTMR6	myotubularin related protein 6	chr13	-0.35	0.01
8003068	MPHOSPH6	M-phase phosphoprotein 6	chr16	-0.35	0.01
8105579	LRRC70	leucine rich repeat containing 70	chr5	-0.36	0.00293
8168438	UPRT	uracil phosphoribosyltransferase (FUR1) homolog (S. cerevisiae)	chrX	-0.36	0.00363
8037453	ZNF285 /// ZFP112	zinc finger protein 285 /// zinc finger protein 112 homolog (mouse)	chr19	-0.36	0.00388
7961875	IFLTD1	intermediate filament tail domain containing 1	chr12	-0.36	0.00466
8029392	ZNF234	zinc finger protein 234	chr19	-0.36	0.00513
8109093	ABLIM3	actin binding LIM protein family, member 3	chr5	-0.36	0.00649
7929919	SFXN3	sideroflexin 3	chr10	-0.36	0.00714
8086150	LRRFIP2	leucine rich repeat (in FLII) interacting protein 2	chr3	-0.36	0.00852
8089701	ZBTB20	zinc finger and BTB domain containing 20	chr3	-0.36	0.01
8168087	IGBP1	immunoglobulin (CD79A) binding protein 1	chrX	-0.36	0.01
8171229	PNPLA4	patatin-like phospholipase domain containing 4	chrX	-0.36	0.01
8112020	MOCS2	molybdenum cofactor synthesis 2	chr5	-0.36	0.01
7927786	REEP3	receptor accessory protein 3	chr10	-0.36	0.01
7951614	PPP2R1B	protein phosphatase 2, regulatory subunit A, beta	chr11	-0.36	0.01
7936856	CHST15	carbohydrate (N-acetylgalactosamine 4-sulfate 6-O) sulfotransferase 15	chr10	-0.36	0.01
7981824	CYFIP1	cytoplasmic FMR1 interacting protein 1	chr15	-0.36	0.01
7987048	MTMR10	myotubularin related protein 10	chr15	-0.36	0.01
7996947	CYB5B	cytochrome b5 type B (outer mitochondrial membrane)	chr16	-0.36	0.01
8164701	SETX	senataxin	chr9	-0.36	0.01
7972735	---	---	chr13	-0.36	0.01
8150988	---	---	chr8	-0.37	0.00309
7975167	GPHN	gephyrin	chr14	-0.37	0.00325
8087419	AMT	aminomethyltransferase	chr3	-0.37	0.00616
7987892	ZFP106	zinc finger protein 106 homolog (mouse)	chr15	-0.37	0.00623
7924107	LPGAT1	lysophosphatidylglycerol acyltransferase 1	chr1	-0.37	0.00632
8058127	CLK1	CDC-like kinase 1	chr2	-0.37	0.00723
8104068	---	---	chr4	-0.37	0.00894
8121212	---	---	chr6	-0.37	0.01
8166493	EIF2S3	eukaryotic translation initiation factor 2, subunit 3 gamma, 52kDa	chrX	-0.37	0.01
7996345	CES2	carboxylesterase 2	chr16	-0.37	0.01
8168691	DIAPH2	diaphanous homolog 2 (Drosophila)	chrX	-0.37	0.01
8010983	ABR	active BCR-related	chr17	-0.37	0.01
8168391	FAM226B	family with sequence similarity 226, member B (non-protein coding)	chrX	-0.38	0.00227
8105633	PPWD1	peptidylprolyl isomerase domain and WD repeat containing 1	chr5	-0.38	0.00305
7943442	DYNC2H1	dynein, cytoplasmic 2, heavy chain 1	chr11	-0.38	0.0053
7981798	TUBGCP5	tubulin, gamma complex associated protein 5	chr15	-0.38	0.00705
8113097	KIAA0825	KIAA0825	chr5	-0.38	0.00717
7901299	CMPK1	cytidine monophosphate (UMP-CMP) kinase 1, cytosolic	chr1	-0.38	0.00872
7983143	STARD9	StAR-related lipid transfer (START) domain containing 9	chr15	-0.38	0.01
7991120	UBE2Q2P1	ubiquitin-conjugating enzyme E2Q family member 2 pseudogene 1	chr15	-0.38	0.01
8120378	KIAA1586	KIAA1586	chr6	-0.38	0.01
8180394	---	---	---	-0.38	0.01
7989883	---	---	chr15	-0.38	0.01
8094789	LIMCH1	LIM and calponin homology domains 1	chr4	-0.38	0.01
8001818	TK2	thymidine kinase 2, mitochondrial	chr16	-0.38	0.01
7999079	ADCY9	adenylate cyclase 9	chr16	-0.38	0.01
7922523	PTP4A1P7	protein tyrosine phosphatase type IVA, member 1 pseudogene 7	chr1	-0.38	0.01
7908125	RGL1	ral guanine nucleotide dissociation stimulator-like 1	chr1	-0.38	0.01
8107532	HSD17B4	hydroxysteroid (17-beta) dehydrogenase 4	chr5	-0.38	0.01
8141363	TRIM4	tripartite motif containing 4	chr7	-0.39	0.00101
8173673	ATRX	alpha thalassemia/mental retardation syndrome X-linked	chrX	-0.39	0.00164
7930837	SLC18A2	solute carrier family 18 (vesicular monoamine), member 2	chr10	-0.39	0.00533
7991562	---	---	chr15	-0.39	0.00775
7983890	GCOM1 /// MYZAP	GRINL1A complex locus 1 /// myocardial zonula adherens protein	chr15	-0.39	0.00831
8129937	CITED2	Cbp/p300-interacting transactivator, with Glu/Asp-rich carboxy-terminal domain, 2	chr6	-0.39	0.01
8180395	---	---	---	-0.39	0.01
8002969	MAF	v-maf musculoaponeurotic fibrosarcoma oncogene homolog (avian)	chr16	-0.39	0.01
8154692	TEK	TEK tyrosine kinase, endothelial	chr9	-0.39	0.01
8090715	NPHP3 /// NPHP3-ACAD11 /// ACAD11	nephronophthisis 3 (adolescent) /// NPHP3-ACAD11 readthrough /// acyl-CoA dehydrogenase family, member 11	chr3	-0.39	0.01
7965436	EEA1	early endosome antigen 1	chr12	-0.39	0.01
7989849	DENND4A	DENN/MADD domain containing 4A	chr15	-0.4	0.00124
7943803	DIXDC1	DIX domain containing 1	chr11	-0.4	0.00165
8029377	ZNF224	zinc finger protein 224	chr19	-0.4	0.00216
7989159	ZNF280D	zinc finger protein 280D	chr15	-0.4	0.00313
8015037	SMARCE1	SWI/SNF related, matrix associated, actin dependent regulator of chromatin, subfamily e, member 1	chr17	-0.4	0.00651
8149877	PNMA2	paraneoplastic Ma antigen 2	chr8	-0.4	0.00718
8103755	FBXO8	F-box protein 8	chr4	-0.4	0.00724
8176193	F8	coagulation factor VIII, procoagulant component	chrX	-0.4	0.00799
8155591	ANKRD20A8P	ankyrin repeat domain 20 family, member A8, pseudogene	chr9	-0.4	0.00873
8049752	SNED1	sushi, nidogen and EGF-like domains 1	chr2	-0.4	0.00898
8173647	ZDHHC15	zinc finger, DHHC-type containing 15	chrX	-0.4	0.01
7993825	SNX29P1 /// SNX29P2 /// SNX29P1 /// SNX29P2	sorting nexin 29 pseudogene 1 /// sorting nexin 29 pseudogene 2 /// sorting nexin 29 pseudogene 1 /// sorting nexin 29 pseudogene 2	chr16	-0.4	0.01
7975113	CHURC1	churchill domain containing 1	chr14	-0.4	0.01
7988605	COPS2	COP9 constitutive photomorphogenic homolog subunit 2 (Arabidopsis)	chr15	-0.4	0.01
7971161	---	---	chr13	-0.4	0.01
8098379	WDR17	WD repeat domain 17	chr4	-0.4	0.01
7928695	FAM213A	family with sequence similarity 213, member A	chr10	-0.4	0.01
8120602	OGFRL1	opioid growth factor receptor-like 1	chr6	-0.4	0.01
7943919	TTC12	tetratricopeptide repeat domain 12	chr11	-0.4	0.01
7970924	STARD13	StAR-related lipid transfer (START) domain containing 13	chr13	-0.41	0.000541
7909390	CR1L	complement component (3b/4b) receptor 1-like	chr1	-0.41	0.00196
8111201	RN5S180	RNA, 5S ribosomal 180	chr5	-0.41	0.0026
8029331	ZNF221	zinc finger protein 221	chr19	-0.41	0.00283
8108475	IGIP	IgA-inducing protein homolog (Bos taurus)	chr5	-0.41	0.00365
8161362	KGFLP2 /// KGFLP1	keratinocyte growth factor-like protein 2 /// fibroblast growth factor 7 pseudogene	chr9	-0.41	0.00485
7988970	FAM214A	family with sequence similarity 214, member A	chr15	-0.41	0.00633
8033362	INSR	insulin receptor	chr19	-0.41	0.00823
7950983	CHORDC1	cysteine and histidine-rich domain (CHORD) containing 1	chr11	-0.41	0.00953
7931914	IL2RA	interleukin 2 receptor, alpha	chr10	-0.41	0.01
8068583	KCNJ15	potassium inwardly-rectifying channel, subfamily J, member 15	chr21	-0.41	0.01
7992917	CLUAP1	clusterin associated protein 1	chr16	-0.41	0.01
7974835	PRKCH	protein kinase C, eta	chr14	-0.41	0.01
8128939	TRAF3IP2	TRAF3 interacting protein 2	chr6	-0.41	0.01
8168412	JPX	JPX transcript, XIST activator (non-protein coding)	chrX	-0.41	0.01
8168291	ITGB1BP2	integrin beta 1 binding protein (melusin) 2	chrX	-0.41	0.01
7911017	SDCCAG8	serologically defined colon cancer antigen 8	chr1	-0.42	0.00052
8088397	ACOX2	acyl-CoA oxidase 2, branched chain	chr3	-0.42	0.000593
8098556	CCDC111	coiled-coil domain containing 111	chr4	-0.42	0.00155
7981951	SNORD116-2	small nucleolar RNA, C/D box 116-2	chr15	-0.42	0.00524
7970999	SPG20	spastic paraplegia 20 (Troyer syndrome)	chr13	-0.42	0.00818
8110971	CMBL	carboxymethylenebutenolidase homolog (Pseudomonas)	chr5	-0.42	0.01
8043363	LINC00152 /// LOC541471	long intergenic non-protein coding RNA 152 /// uncharacterized LOC541471	chr2	-0.42	0.01
7994576	SNX29P1 /// SNX29P2 /// SNX29 /// SNX29P1 /// SNX29P2	sorting nexin 29 pseudogene 1 /// sorting nexin 29 pseudogene 2 /// sorting nexin 29 /// sorting nexin 29 pseudogene 1 /// sorting nexin 29 pseudogene 2	chr16	-0.42	0.01
7951535	KDELC2	KDEL (Lys-Asp-Glu-Leu) containing 2	chr11	-0.42	0.01
7933008	---	---	chr10	-0.42	0.01
8008113	CALCOCO2	calcium binding and coiled-coil domain 2	chr17	-0.43	0.00107
7905339	GABPB2	GA binding protein transcription factor, beta subunit 2	chr1	-0.43	0.00124
8150076	DUSP4	dual specificity phosphatase 4	chr8	-0.43	0.0042
8104066	SORBS2	sorbin and SH3 domain containing 2	chr4	-0.43	0.00614
8180393	---	---	---	-0.43	0.00616
7922707	RNASEL	ribonuclease L (2',5'-oligoisoadenylate synthetase-dependent)	chr1	-0.43	0.00627
8144894	INTS10	integrator complex subunit 10	chr8	-0.43	0.00633
8127425	LMBRD1	LMBR1 domain containing 1	chr6	-0.43	0.00798
8054611	LINC00152 /// LOC541471	long intergenic non-protein coding RNA 152 /// uncharacterized LOC541471	chr2	-0.43	0.01
8149590	---	---	chr8	-0.43	0.01
8180403	---	---	---	-0.43	0.01
7936871	OAT	ornithine aminotransferase	chr10	-0.43	0.01
8021685	CCDC102B	coiled-coil domain containing 102B	chr18	-0.43	0.01
7970973	TRNAQ50P	transfer RNA glutamine 50 (anticodon UUG) pseudogene	chr13	-0.43	0.01
8144931	ATP6V1B2	ATPase, H+ transporting, lysosomal 56/58kDa, V1 subunit B2	chr8	-0.43	0.01
8058091	SATB2	SATB homeobox 2	chr2	-0.43	0.01
7910706	LGALS8	lectin, galactoside-binding, soluble, 8	chr1	-0.43	0.01
8112439	CCDC125	coiled-coil domain containing 125	chr5	-0.44	0.00231
7983321	CASC4	cancer susceptibility candidate 4	chr15	-0.44	0.00246
8161415	---	---	chr9	-0.44	0.00271
8025301	CD209	CD209 molecule	chr19	-0.44	0.0032
7938563	ARNTL	aryl hydrocarbon receptor nuclear translocator-like	chr11	-0.44	0.00617
8109938	RANBP17	RAN binding protein 17	chr5	-0.44	0.00661
8102065	BDH2	3-hydroxybutyrate dehydrogenase, type 2	chr4	-0.44	0.01
8147461	SDC2	syndecan 2	chr8	-0.44	0.01
7982878	CHP1	calcineurin-like EF hand protein 1	chr15	-0.44	0.01
7981984	SNORD116-18	small nucleolar RNA, C/D box 116-18	chr15	-0.44	0.01
8047401	CFLAR	CASP8 and FADD-like apoptosis regulator	chr2	-0.45	0.000485
8021275	POLI	polymerase (DNA directed) iota	chr18	-0.45	0.00113
8078270	RPL15	ribosomal protein L15	chr3	-0.45	0.00202
7981970	SNORD116-11	small nucleolar RNA, C/D box 116-11	chr15	-0.45	0.00227
7944751	C11orf63	chromosome 11 open reading frame 63	chr11	-0.45	0.00325
8104601	BASP1	brain abundant, membrane attached signal protein 1	chr5	-0.45	0.0041
8107613	SNX2	sorting nexin 2	chr5	-0.45	0.00516
7965343	POC1B	POC1 centriolar protein homolog B (Chlamydomonas)	chr12	-0.45	0.00579
8106448	PDE8B	phosphodiesterase 8B	chr5	-0.45	0.00596
8128698	SESN1	sestrin 1	chr6	-0.45	0.00746
7965322	KITLG	KIT ligand	chr12	-0.45	0.00891
8133961	RUNDC3B	RUN domain containing 3B	chr7	-0.45	0.01
8102050	SLC9B2	solute carrier family 9, subfamily B (NHA2, cation proton antiporter 2), member 2	chr4	-0.45	0.01
8042168	KIAA1841	KIAA1841	chr2	-0.45	0.01
7983828	TEX9	testis expressed 9	chr15	-0.45	0.01
8144712	KIAA1456	KIAA1456	chr8	-0.46	0.000446
7953878	CLEC2D	C-type lectin domain family 2, member D	chr12	-0.46	0.00129
8106303	POLK	polymerase (DNA directed) kappa	chr5	-0.46	0.00323
7950764	DLG2	discs, large homolog 2 (Drosophila)	chr11	-0.46	0.00478
8141146	---	---	chr7	-0.46	0.00491
7929012	STAMBPL1	STAM binding protein-like 1	chr10	-0.46	0.00512
7905571	S100A9	S100 calcium binding protein A9	chr1	-0.46	0.00637
7986329	NR2F2	nuclear receptor subfamily 2, group F, member 2	chr15	-0.46	0.00736
8065359	CD93	CD93 molecule	chr20	-0.46	0.00972
8046461	ZAK	sterile alpha motif and leucine zipper containing kinase AZK	chr2	-0.46	0.01
8177628	CCDC125	coiled-coil domain containing 125	chr5	-0.47	0.00102
7910387	RHOU	ras homolog family member U	chr1	-0.47	0.00258
8152962	LRRC6	leucine rich repeat containing 6	chr8	-0.47	0.00401
7989885	LOC646358 /// DNAJB14	DnaJ (Hsp40) homolog, subfamily B, member 14 pseudogene /// DnaJ (Hsp40) homolog, subfamily B, member 14	chr15	-0.47	0.00474
8108737	PCDHB13	protocadherin beta 13	chr5	-0.47	0.00629
8076612	EFCAB6	EF-hand calcium binding domain 6	chr22	-0.47	0.00808
8127201	COL21A1	collagen, type XXI, alpha 1	chr6	-0.47	0.00862
8149733	TNFRSF10B	tumor necrosis factor receptor superfamily, member 10b	chr8	-0.47	0.00902
7978586	CFL2	cofilin 2 (muscle)	chr14	-0.47	0.01
8021470	PMAIP1	phorbol-12-myristate-13-acetate-induced protein 1	chr18	-0.47	0.01
8104012	---	---	chr4	-0.47	0.01
7990818	BCL2A1	BCL2-related protein A1	chr15	-0.47	0.01
8090433	MGLL	monoglyceride lipase	chr3	-0.47	0.01
7983512	SQRDL	sulfide quinone reductase-like (yeast)	chr15	-0.47	0.01
7924636	TMEM63A	transmembrane protein 63A	chr1	-0.47	0.01
8080804	KCTD6	potassium channel tetramerisation domain containing 6	chr3	-0.47	0.01
8089606	WDR52	WD repeat domain 52	chr3	-0.47	0.01
7989193	---	---	chr15	-0.48	0.00037
7989387	VPS13C	vacuolar protein sorting 13 homolog C (S. cerevisiae)	chr15	-0.48	0.00298
7981972	SNORD116-12	small nucleolar RNA, C/D box 116-12	chr15	-0.48	0.00359
8038967	ZNF83	zinc finger protein 83	chr19	-0.48	0.00369
7989365	RORA	RAR-related orphan receptor A	chr15	-0.48	0.00467
7978391	NOVA1	neuro-oncological ventral antigen 1	chr14	-0.48	0.00588
8089596	WDR52	WD repeat domain 52	chr3	-0.48	0.0067
7991602	PCSK6 /// LOC100507472	proprotein convertase subtilisin/kexin type 6 /// uncharacterized LOC100507472	chr15	-0.48	0.00751
8109697	CCNG1	cyclin G1	chr5	-0.48	0.01
7918902	CD58	CD58 molecule	chr1	-0.48	0.01
8098084	ETFDH	electron-transferring-flavoprotein dehydrogenase	chr4	-0.49	0.00127
7931977	ITIH5	inter-alpha-trypsin inhibitor heavy chain family, member 5	chr10	-0.49	0.00231
7995382	PHKB	phosphorylase kinase, beta	chr16	-0.49	0.00342
8157214	---	---	chr9	-0.49	0.00363
8098470	CLDN22 /// WWC2	claudin 22 /// WW and C2 domain containing 2	chr4	-0.49	0.00641
8146788	RN5S268	RNA, 5S ribosomal 268	chr8	-0.49	0.01
7970763	FLT1	fms-related tyrosine kinase 1 (vascular endothelial growth factor/vascular permeability factor receptor)	chr13	-0.49	0.01
7999468	LITAF	lipopolysaccharide-induced TNF factor	chr16	-0.49	0.01
8063923	SLCO4A1	solute carrier organic anion transporter family, member 4A1	chr20	-0.49	0.01
8173299	EDA2R	ectodysplasin A2 receptor	chrX	-0.5	0.000894
8020164	GNAL	guanine nucleotide binding protein (G protein), alpha activating activity polypeptide, olfactory type	chr18	-0.5	0.000967
8145281	SLC25A37	solute carrier family 25 (mitochondrial iron transporter), member 37	chr8	-0.5	0.00105
8144812	PCM1	pericentriolar material 1	chr8	-0.5	0.00117
8106626	FAM151B	family with sequence similarity 151, member B	chr5	-0.5	0.00124
8121794	SMPDL3A	sphingomyelin phosphodiesterase, acid-like 3A	chr6	-0.5	0.00207
7926506	CACNB2	calcium channel, voltage-dependent, beta 2 subunit	chr10	-0.5	0.00235
8047677	CD28	CD28 molecule	chr2	-0.5	0.00518
7969166	KCNRG	potassium channel regulator	chr13	-0.5	0.00587
7924977	PGBD5	piggyBac transposable element derived 5	chr1	-0.5	0.0062
8103998	UFSP2	UFM1-specific peptidase 2	chr4	-0.5	0.00784
8002470	HYDIN /// HYDIN2	HYDIN, axonemal central pair apparatus protein /// HYDIN2, axonemal central pair apparatus protein (pseudogene)	chr16	-0.5	0.01
8166140	MOSPD2	motile sperm domain containing 2	chrX	-0.5	0.01
7943263	AMOTL1	angiomotin like 1	chr11	-0.51	6.87e-05
8169419	ALG13	asparagine-linked glycosylation 13 homolog (S. cerevisiae)	chrX	-0.51	0.00135
8017867	FAM20A	family with sequence similarity 20, member A	chr17	-0.51	0.00141
7974851	HIF1A	hypoxia inducible factor 1, alpha subunit (basic helix-loop-helix transcription factor)	chr14	-0.51	0.00245
7961546	EPS8	epidermal growth factor receptor pathway substrate 8	chr12	-0.51	0.00353
8018038	ABCA5	ATP-binding cassette, sub-family A (ABC1), member 5	chr17	-0.51	0.00374
7925257	LYST	lysosomal trafficking regulator	chr1	-0.51	0.00414
7990657	TBC1D2B	TBC1 domain family, member 2B	chr15	-0.51	0.00588
8084880	HES1	hairy and enhancer of split 1, (Drosophila)	chr3	-0.51	0.0059
7942569	SLCO2B1	solute carrier organic anion transporter family, member 2B1	chr11	-0.51	0.01
7922889	IVNS1ABP	influenza virus NS1A binding protein	chr1	-0.51	0.01
8136662	MGAM	maltase-glucoamylase (alpha-glucosidase)	chr7	-0.51	0.01
7927799	REEP3	receptor accessory protein 3	chr10	-0.52	0.00151
7985224	TBC1D2B /// LOC646938	TBC1 domain family, member 2B /// TBC1 domain family, member 2B pseudogene	chr15	-0.52	0.00195
8168976	GPRASP2 /// ARMCX5-GPRASP2	G protein-coupled receptor associated sorting protein 2 /// ARMCX5-GPRASP2 readthrough	chrX	-0.52	0.00311
7999476	---	---	chr16	-0.52	0.00481
7996917	---	---	chr16	-0.52	0.00826
8108724	PCDHB10 /// PCDHB9	protocadherin beta 10 /// protocadherin beta 9	chr5	-0.52	0.01
8162147	ZCCHC6	zinc finger, CCHC domain containing 6	chr9	-0.52	0.01
8108744	PCDHB14	protocadherin beta 14	chr5	-0.53	0.000718
8041179	CLIP4	CAP-GLY domain containing linker protein family, member 4	chr2	-0.53	0.00116
7924307	---	---	chr1	-0.53	0.00126
8113103	KIAA0825	KIAA0825	chr5	-0.53	0.00248
7943715	ZC3H12C	zinc finger CCCH-type containing 12C	chr11	-0.53	0.00318
8088680	EOGT	EGF domain-specific O-linked N-acetylglucosamine (GlcNAc) transferase	chr3	-0.53	0.00466
8124498	ZNF204P	zinc finger protein 204, pseudogene	chr6	-0.53	0.00489
7911155	SCCPDH	saccharopine dehydrogenase (putative)	chr1	-0.53	0.0049
8002481	HYDIN /// HYDIN2	HYDIN, axonemal central pair apparatus protein /// HYDIN2, axonemal central pair apparatus protein (pseudogene)	chr16	-0.53	0.00582
7967685	STX2	syntaxin 2	chr12	-0.53	0.00771
8023043	PSTPIP2	proline-serine-threonine phosphatase interacting protein 2	chr18	-0.53	0.00898
8097717	ARHGAP10	Rho GTPase activating protein 10	chr4	-0.53	0.00968
7954196	MGST1	microsomal glutathione S-transferase 1	chr12	-0.53	0.01
8145470	DPYSL2	dihydropyrimidinase-like 2	chr8	-0.53	0.01
8132092	INMT	indolethylamine N-methyltransferase	chr7	-0.53	0.01
8168557	SH3BGRL	SH3 domain binding glutamic acid-rich protein like	chrX	-0.54	0.00085
7950810	SYTL2	synaptotagmin-like 2	chr11	-0.54	0.00104
8157487	PAPPA	pregnancy-associated plasma protein A, pappalysin 1	chr9	-0.54	0.00344
8102720	ANKRD50	ankyrin repeat domain 50	chr4	-0.54	0.00565
8046124	DHRS9	dehydrogenase/reductase (SDR family) member 9	chr2	-0.54	0.00568
8129458	ARHGAP18	Rho GTPase activating protein 18	chr6	-0.54	0.00671
8138602	DFNA5	deafness, autosomal dominant 5	chr7	-0.54	0.00801
7994280	IL4R	interleukin 4 receptor	chr16	-0.55	0.00074
7932326	CUBN	cubilin (intrinsic factor-cobalamin receptor)	chr10	-0.55	0.00166
8101780	HPGDS	hematopoietic prostaglandin D synthase	chr4	-0.55	0.0025
8111864	C6	complement component 6	chr5	-0.55	0.00256
8089714	LSAMP	limbic system-associated membrane protein	chr3	-0.55	0.00283
7932160	FAM107B	family with sequence similarity 107, member B	chr10	-0.55	0.00357
8043909	NPAS2	neuronal PAS domain protein 2	chr2	-0.55	0.00507
7989277	MYO1E	myosin IE	chr15	-0.55	0.00538
8115261	CCDC69	coiled-coil domain containing 69	chr5	-0.55	0.00576
8174654	KLHL13	kelch-like 13 (Drosophila)	chrX	-0.55	0.00804
7981990	SNORD116-21 /// SNORD116@	small nucleolar RNA, C/D box 116-21 /// small nucleolar RNA, C/D box 116 cluster	chr15	-0.55	0.00806
7989493	RPS27L	ribosomal protein S27-like	chr15	-0.55	0.01
8150225	RAB11FIP1	RAB11 family interacting protein 1 (class I)	chr8	-0.55	0.01
7952341	CLMP	CXADR-like membrane protein	chr11	-0.55	0.01
8048432	CYP27A1	cytochrome P450, family 27, subfamily A, polypeptide 1	chr2	-0.55	0.01
8120431	PTP4A1	protein tyrosine phosphatase type IVA, member 1	chr6	-0.56	0.00101
7989069	PYGO1	pygopus homolog 1 (Drosophila)	chr15	-0.56	0.00149
7902512	DNAJB4	DnaJ (Hsp40) homolog, subfamily B, member 4	chr1	-0.56	0.00157
8045499	HNMT	histamine N-methyltransferase	chr2	-0.56	0.00446
8040473	RHOB	ras homolog family member B	chr2	-0.56	0.00631
7960771	CD163L1	CD163 molecule-like 1	chr12	-0.56	0.00902
8147019	ZC2HC1A	zinc finger, C2HC-type containing 1A	chr8	-0.56	0.00917
8110123	FAM153B	family with sequence similarity 153, member B	chr5	-0.56	0.01
7975676	C14orf45	chromosome 14 open reading frame 45	chr14	-0.57	0.00066
8151447	IL7	interleukin 7	chr8	-0.57	0.000854
8149534	ASAH1	N-acylsphingosine amidohydrolase (acid ceramidase) 1	chr8	-0.57	0.00091
8174119	ZMAT1	zinc finger, matrin-type 1	chrX	-0.57	0.0023
7989037	DYX1C1-CCPG1 /// CCPG1	DYX1C1-CCPG1 readthrough (non-protein coding) /// cell cycle progression 1	chr15	-0.57	0.00294
7940259	---	---	chr11	-0.57	0.00392
8149264	PPP1R3B	protein phosphatase 1, regulatory subunit 3B	chr8	-0.57	0.00443
8146839	C8orf34	chromosome 8 open reading frame 34	chr8	-0.57	0.00528
8040365	TRIB2	tribbles homolog 2 (Drosophila)	chr2	-0.57	0.00855
7952408	SIAE	sialic acid acetylesterase	chr11	-0.57	0.00957
8054254	AFF3	AF4/FMR2 family, member 3	chr2	-0.57	0.01
8017619	---	---	---	-0.57	0.01
8146115	C8orf4	chromosome 8 open reading frame 4	chr8	-0.57	0.01
7902227	GADD45A	growth arrest and DNA-damage-inducible, alpha	chr1	-0.57	0.01
8023727	DSEL	dermatan sulfate epimerase-like	chr18	-0.58	0.000968
7982004	LOC100506948 /// SNORD116-28 /// SNORD115-26 /// SNORD115-13 /// SNORD115-7 /// SNORD107	uncharacterized LOC100506948 /// small nucleolar RNA, C/D box 116-28 /// small nucleolar RNA, C/D box 115-26 /// small nucleolar RNA, C/D box 115-13 /// small nucleolar RNA, C/D box 115-7 /// small nucleolar RNA, C/D box 107	chr15	-0.58	0.0021
8097282	SPRY1	sprouty homolog 1, antagonist of FGF signaling (Drosophila)	chr4	-0.58	0.00432
8148966	RPL23AP53	ribosomal protein L23a pseudogene 53	chr8	-0.58	0.00771
8110932	SEMA5A	sema domain, seven thrombospondin repeats (type 1 and type 1-like), transmembrane domain (TM) and short cytoplasmic domain, (semaphorin) 5A	chr5	-0.58	0.00996
7942123	CCND1	cyclin D1	chr11	-0.58	0.01
7896744	OR4F3 /// OR4F16 /// OR4F29 /// OR4F21	olfactory receptor, family 4, subfamily F, member 3 /// olfactory receptor, family 4, subfamily F, member 16 /// olfactory receptor, family 4, subfamily F, member 29 /// olfactory receptor, family 4, subfamily F, member 21	chr1	-0.58	0.01
7911345	OR4F3 /// OR4F16 /// OR4F29 /// OR4F21	olfactory receptor, family 4, subfamily F, member 3 /// olfactory receptor, family 4, subfamily F, member 16 /// olfactory receptor, family 4, subfamily F, member 29 /// olfactory receptor, family 4, subfamily F, member 21	chr1	-0.58	0.01
8110672	OR4F3 /// OR4F16 /// OR4F29 /// OR4F21	olfactory receptor, family 4, subfamily F, member 3 /// olfactory receptor, family 4, subfamily F, member 16 /// olfactory receptor, family 4, subfamily F, member 29 /// olfactory receptor, family 4, subfamily F, member 21	chr5	-0.58	0.01
7933733	FAM13C	family with sequence similarity 13, member C	chr10	-0.59	0.000413
7909967	CAPN2	calpain 2, (m/II) large subunit	chr1	-0.59	0.00074
8010139	SEC14L1	SEC14-like 1 (S. cerevisiae)	chr17	-0.59	0.00202
7988644	ATP8B4	ATPase, class I, type 8B, member 4	chr15	-0.59	0.00451
8113039	MEF2C	myocyte enhancer factor 2C	chr5	-0.59	0.01
8157524	TLR4	toll-like receptor 4	chr9	-0.59	0.01
7909841	MARK1	MAP/microtubule affinity-regulating kinase 1	chr1	-0.59	0.01
8174103	GK /// GK3P	glycerol kinase /// glycerol kinase 3 pseudogene	chrX	-0.59	0.01
7989073	PRTG	protogenin	chr15	-0.6	0.00012
7981998	SNORD116-25	small nucleolar RNA, C/D box 116-25	chr15	-0.6	0.000183
7989023	RAB27A	RAB27A, member RAS oncogene family	chr15	-0.6	0.000286
8085774	ZNF385D	zinc finger protein 385D	chr3	-0.6	0.000776
8161174	GNE	glucosamine (UDP-N-acetyl)-2-epimerase/N-acetylmannosamine kinase	chr9	-0.6	0.00177
7903227	PALMD	palmdelphin	chr1	-0.6	0.00291
7970793	SLC46A3	solute carrier family 46, member 3	chr13	-0.6	0.00516
8135587	CAV2	caveolin 2	chr7	-0.6	0.00551
7965040	PHLDA1	pleckstrin homology-like domain, family A, member 1	chr12	-0.6	0.00562
7960794	CD163	CD163 molecule	chr12	-0.6	0.01
8168968	GPRASP1	G protein-coupled receptor associated sorting protein 1	chrX	-0.61	0.00087
8111993	FGF10	fibroblast growth factor 10	chr5	-0.61	0.00273
8114354	NME5	NME/NM23 family member 5	chr5	-0.61	0.00417
8006531	SLFN5	schlafen family member 5	chr17	-0.61	0.00644
7931097	HTRA1	HtrA serine peptidase 1	chr10	-0.61	0.01
7971486	PPP1R2P4 /// KIAA0226L	protein phosphatase 1, regulatory (inhibitor) subunit 2 pseudogene 4 /// KIAA0226-like	chr13	-0.61	0.01
7997593	ATP2C2	ATPase, Ca++ transporting, type 2C, member 2	chr16	-0.61	0.01
8165866	STS	steroid sulfatase (microsomal), isozyme S	chrX	-0.62	0.00132
7943349	ARHGAP42	Rho GTPase activating protein 42	chr11	-0.62	0.00319
7909441	G0S2	G0/G1switch 2	chr1	-0.62	0.00443
8108720	PCDHB9	protocadherin beta 9	chr5	-0.62	0.0058
8115543	EBF1	early B-cell factor 1	chr5	-0.62	0.00923
8150691	EFCAB1	EF-hand calcium binding domain 1	chr8	-0.62	0.01
7982052	SNORD115-23 /// PAR4	small nucleolar RNA, C/D box 115-23 /// Prader-Willi/Angelman region gene 4	chr15	-0.62	0.01
8094988	CWH43	cell wall biogenesis 43 C-terminal homolog (S. cerevisiae)	chr4	-0.62	0.01
8166632	---	---	chrX	-0.62	0.01
8080781	PXK	PX domain containing serine/threonine kinase	chr3	-0.63	0.000116
8004957	DNAH9	dynein, axonemal, heavy chain 9	chr17	-0.63	0.00346
8078350	TGFBR2	transforming growth factor, beta receptor II (70/80kDa)	chr3	-0.63	0.00474
8108716	PCDHB16	protocadherin beta 16	chr5	-0.63	0.01
7996819	CDH3	cadherin 3, type 1, P-cadherin (placental)	chr16	-0.63	0.01
8080938	MITF	microphthalmia-associated transcription factor	chr3	-0.64	0.000691
8096116	AGPAT9	1-acylglycerol-3-phosphate O-acyltransferase 9	chr4	-0.64	0.00196
8064904	FERMT1	fermitin family member 1	chr20	-0.64	0.00198
7983940	FAM63B	family with sequence similarity 63, member B	chr15	-0.64	0.00235
7917912	DPYD	dihydropyrimidine dehydrogenase	chr1	-0.64	0.00277
8055624	ZEB2	zinc finger E-box binding homeobox 2	chr2	-0.64	0.01
8173825	RPS6KA6	ribosomal protein S6 kinase, 90kDa, polypeptide 6	chrX	-0.64	0.01
8133983	ADAM22	ADAM metallopeptidase domain 22	chr7	-0.64	0.01
8144742	EFHA2	EF-hand domain family, member A2	chr8	-0.65	3.7e-05
7974214	KLHDC1	kelch domain containing 1	chr14	-0.65	0.000224
7970455	CRYL1	crystallin, lambda 1	chr13	-0.65	0.000635
7926368	VIM	vimentin	chr10	-0.65	0.00147
8149413	DLC1	deleted in liver cancer 1	chr8	-0.65	0.00341
8111915	SEPP1	selenoprotein P, plasma, 1	chr5	-0.65	0.00403
7937135	TTC40	tetratricopeptide repeat domain 40	chr10	-0.65	0.00804
7929032	FAS	Fas (TNF receptor superfamily, member 6)	chr10	-0.66	0.00315
7963187	LIMA1	LIM domain and actin binding 1	chr12	-0.66	0.0084
8103226	TMEM154	transmembrane protein 154	chr4	-0.66	0.00959
8078619	ITGA9	integrin, alpha 9	chr3	-0.66	0.00976
7917182	ELTD1	EGF, latrophilin and seven transmembrane domain containing 1	chr1	-0.66	0.01
8136658	TRNAQ48P	transfer RNA glutamine 48 (anticodon UUG) pseudogene	chr7	-0.66	0.01
8107673	GRAMD3	GRAM domain containing 3	chr5	-0.67	0.000266
8056151	PLA2R1	phospholipase A2 receptor 1, 180kDa	chr2	-0.67	0.000399
7982068	SNORD115-31	small nucleolar RNA, C/D box 115-31	chr15	-0.67	0.00266
8138553	FAM126A	family with sequence similarity 126, member A	chr7	-0.67	0.00305
7990757	CTSH	cathepsin H	chr15	-0.67	0.00332
8102848	SETD7	SET domain containing (lysine methyltransferase) 7	chr4	-0.67	0.00868
8022118	EPB41L3	erythrocyte membrane protein band 4.1-like 3	chr18	-0.67	0.01
7974920	SYNE2	spectrin repeat containing, nuclear envelope 2	chr14	-0.67	0.01
7981960	SNORD116-6	small nucleolar RNA, C/D box 116-6	chr15	-0.68	0.000798
8002492	HYDIN	HYDIN, axonemal central pair apparatus protein	chr16	-0.68	0.00187
7916986	NEGR1	neuronal growth regulator 1	chr1	-0.68	0.00443
8122222	PDE7B	phosphodiesterase 7B	chr6	-0.68	0.00644
8102532	PDE5A	phosphodiesterase 5A, cGMP-specific	chr4	-0.68	0.01
8030860	FPR2	formyl peptide receptor 2	chr19	-0.68	0.01
8021946	COLEC12	collectin sub-family member 12	chr18	-0.68	0.01
8143643	TPK1	thiamin pyrophosphokinase 1	chr7	-0.68	0.01
7993807	TMEM159	transmembrane protein 159	chr16	-0.69	2.58e-05
7981955	LOC100506948 /// SNORD116-28 /// SNORD115-26 /// SNORD115-13 /// SNORD115-7 /// SNORD107 /// SNORD116-4 /// SNRPN	uncharacterized LOC100506948 /// small nucleolar RNA, C/D box 116-28 /// small nucleolar RNA, C/D box 115-26 /// small nucleolar RNA, C/D box 115-13 /// small nucleolar RNA, C/D box 115-7 /// small nucleolar RNA, C/D box 107 /// small nucleolar RNA, C/D box 116-4 /// small nuclear ribonucleoprotein polypeptide N	chr15	-0.69	0.000862
8023855	CYB5A	cytochrome b5 type A (microsomal)	chr18	-0.69	0.00376
8100994	CXCL2	chemokine (C-X-C motif) ligand 2	chr4	-0.69	0.00415
8150036	KIF13B	kinesin family member 13B	chr8	-0.69	0.00617
8054377	FHL2	four and a half LIM domains 2	chr2	-0.69	0.00991
7954899	CNTN1	contactin 1	chr12	-0.69	0.01
8169473	PLS3	plastin 3	chrX	-0.69	0.01
7926786	APBB1IP	amyloid beta (A4) precursor protein-binding, family B, member 1 interacting protein	chr10	-0.69	0.01
8100541	IGFBP7	insulin-like growth factor binding protein 7	chr4	-0.69	0.01
7982006	SNORD116-29	small nucleolar RNA, C/D box 116-29	chr15	-0.7	0.000917
7981978	SNORD116-15	small nucleolar RNA, C/D box 116-15	chr15	-0.7	0.0012
8161839	NMRK1	nicotinamide riboside kinase 1	chr9	-0.7	0.00138
8145954	TACC1	transforming, acidic coiled-coil containing protein 1	chr8	-0.7	0.00158
7932985	NRP1	neuropilin 1	chr10	-0.7	0.00247
8086540	SLC6A20	solute carrier family 6 (proline IMINO transporter), member 20	chr3	-0.7	0.00556
8156783	COL15A1	collagen, type XV, alpha 1	chr9	-0.7	0.00575
7925062	SIPA1L2	signal-induced proliferation-associated 1 like 2	chr1	-0.7	0.00744
8043981	IL1R2	interleukin 1 receptor, type II	chr2	-0.7	0.00975
7934936	SLC16A12	solute carrier family 16, member 12 (monocarboxylic acid transporter 12)	chr10	-0.7	0.01
7909954	DISP1	dispatched homolog 1 (Drosophila)	chr1	-0.7	0.01
7981974	SNORD116-13	small nucleolar RNA, C/D box 116-13	chr15	-0.71	0.000151
7916789	WDR78	WD repeat domain 78	chr1	-0.71	0.000319
8002446	HYDIN	HYDIN, axonemal central pair apparatus protein	chr16	-0.71	0.0014
8166906	GPR34	G protein-coupled receptor 34	chrX	-0.71	0.00219
8175393	ARHGEF6	Rac/Cdc42 guanine nucleotide exchange factor (GEF) 6	chrX	-0.71	0.00384
8108733	PCDHB12	protocadherin beta 12	chr5	-0.71	0.00416
7962579	AMIGO2	adhesion molecule with Ig-like domain 2	chr12	-0.71	0.00525
8145291	SLC25A37	solute carrier family 25 (mitochondrial iron transporter), member 37	chr8	-0.72	4.69e-05
8112139	IL6ST	interleukin 6 signal transducer (gp130, oncostatin M receptor)	chr5	-0.72	0.000798
8033445	CD209	CD209 molecule	chr19	-0.72	0.00083
7954065	GPRC5A	G protein-coupled receptor, family C, group 5, member A	chr12	-0.73	0.00114
7981953	SNORD116-3 /// SNORD116-9	small nucleolar RNA, C/D box 116-3 /// small nucleolar RNA, C/D box 116-9	chr15	-0.73	0.00151
7981966	SNORD116-3 /// SNORD116-9	small nucleolar RNA, C/D box 116-3 /// small nucleolar RNA, C/D box 116-9	chr15	-0.73	0.00151
7933204	C10orf10	chromosome 10 open reading frame 10	chr10	-0.73	0.00669
8102587	NDNF	neuron-derived neurotrophic factor	chr4	-0.73	0.01
8007100	IGFBP4	insulin-like growth factor binding protein 4	chr17	-0.73	0.01
8027002	GDF15	growth differentiation factor 15	chr19	-0.73	0.01
7939341	CD44	CD44 molecule (Indian blood group)	chr11	-0.74	0.000129
7989094	NEDD4	neural precursor cell expressed, developmentally down-regulated 4, E3 ubiquitin protein ligase	chr15	-0.74	0.00111
8078155	GALNTL2	UDP-N-acetyl-alpha-D-galactosamine:polypeptide N-acetylgalactosaminyltransferase-like 2	chr3	-0.74	0.00761
7945262	JAM3	junctional adhesion molecule 3	chr11	-0.74	0.00833
8163002	KLF4	Kruppel-like factor 4 (gut)	chr9	-0.74	0.00868
7981982	SNORD116-17 /// SNORD116-19 /// SNORD116@ /// SNRPN	small nucleolar RNA, C/D box 116-17 /// small nucleolar RNA, C/D box 116-19 /// small nucleolar RNA, C/D box 116 cluster /// small nuclear ribonucleoprotein polypeptide N	chr15	-0.75	0.000869
7981986	SNORD116-17 /// SNORD116-19 /// SNORD116@ /// SNRPN	small nucleolar RNA, C/D box 116-17 /// small nucleolar RNA, C/D box 116-19 /// small nucleolar RNA, C/D box 116 cluster /// small nuclear ribonucleoprotein polypeptide N	chr15	-0.75	0.000869
8152976	TMEM71	transmembrane protein 71	chr8	-0.75	0.00136
7981958	SNORD116-5 /// SNORD116-7	small nucleolar RNA, C/D box 116-5 /// small nucleolar RNA, C/D box 116-7	chr15	-0.75	0.00147
7981962	SNORD116-5 /// SNORD116-7	small nucleolar RNA, C/D box 116-5 /// small nucleolar RNA, C/D box 116-7	chr15	-0.75	0.00147
7954810	LRRK2	leucine-rich repeat kinase 2	chr12	-0.75	0.00238
8145293	ADAM28	ADAM metallopeptidase domain 28	chr8	-0.75	0.00321
8115831	DUSP1	dual specificity phosphatase 1	chr5	-0.75	0.01
8057463	CERKL	ceramide kinase-like	chr2	-0.75	0.01
7981994	SNORD116-23	small nucleolar RNA, C/D box 116-23	chr15	-0.76	0.000163
7969613	GPC6	glypican 6	chr13	-0.76	0.000577
7935228	---	---	chr10	-0.76	0.00491
7982020	LOC100506948 /// SNORD116-28 /// SNORD115-26 /// SNORD115-13 /// SNORD115-7 /// SNORD107 /// SNRPN	uncharacterized LOC100506948 /// small nucleolar RNA, C/D box 116-28 /// small nucleolar RNA, C/D box 115-26 /// small nucleolar RNA, C/D box 115-13 /// small nucleolar RNA, C/D box 115-7 /// small nucleolar RNA, C/D box 107 /// small nuclear ribonucleoprotein polypeptide N	chr15	-0.76	0.00606
7917019	C1orf173	chromosome 1 open reading frame 173	chr1	-0.76	0.00671
7976073	LOC100506718 /// FLRT2	uncharacterized LOC100506718 /// fibronectin leucine rich transmembrane protein 2	chr14	-0.76	0.01
8058591	ACADL	acyl-CoA dehydrogenase, long chain	chr2	-0.77	1.61e-05
8046099	NOSTRIN	nitric oxide synthase trafficker	chr2	-0.77	0.000119
7981919	SNRPN /// SNURF /// PAR-SN /// SNORD107	small nuclear ribonucleoprotein polypeptide N /// SNRPN upstream reading frame /// paternally expressed transcript PAR-SN /// small nucleolar RNA, C/D box 107	chr15	-0.77	0.000479
8174474	ACSL4	acyl-CoA synthetase long-chain family member 4	chrX	-0.77	0.000704
8104079	FAT1	FAT tumor suppressor homolog 1 (Drosophila)	chr4	-0.77	0.00155
8066822	SULF2	sulfatase 2	chr20	-0.77	0.00626
8162404	ECM2	extracellular matrix protein 2, female organ and adipocyte specific	chr9	-0.77	0.01
8113666	SEMA6A	sema domain, transmembrane domain (TM), and cytoplasmic domain, (semaphorin) 6A	chr5	-0.77	0.01
7921916	RGS5	regulator of G-protein signaling 5	chr1	-0.77	0.01
7981964	SNORD116-8	small nucleolar RNA, C/D box 116-8	chr15	-0.78	0.000546
8144786	SLC7A2	solute carrier family 7 (cationic amino acid transporter, y+ system), member 2	chr8	-0.78	0.000896
8149551	PSD3	pleckstrin and Sec7 domain containing 3	chr8	-0.78	0.002
7981947	SNORD109B /// SNORD109A	small nucleolar RNA, C/D box 109B /// small nucleolar RNA, C/D box 109A	chr15	-0.79	0.000363
7982098	SNORD109B /// SNORD109A	small nucleolar RNA, C/D box 109B /// small nucleolar RNA, C/D box 109A	chr15	-0.79	0.000363
7943369	TMEM133	transmembrane protein 133	chr11	-0.79	0.000385
7942372	FOLR2	folate receptor 2 (fetal)	chr11	-0.79	0.00125
8140556	HGF	hepatocyte growth factor (hepapoietin A; scatter factor)	chr7	-0.8	0.00117
8166469	SAT1	spermidine/spermine N1-acetyltransferase 1	chrX	-0.8	0.00187
7960464	VWF	von Willebrand factor	chr12	-0.8	0.00232
8095110	KIT	v-kit Hardy-Zuckerman 4 feline sarcoma viral oncogene homolog	chr4	-0.8	0.00422
7909866	2013-03-02	mitochondrial amidoxime reducing component 2	chr1	-0.81	0.000398
7956658	SLC16A7	solute carrier family 16, member 7 (monocarboxylic acid transporter 2)	chr12	-0.81	0.000501
8120335	FAM83B	family with sequence similarity 83, member B	chr6	-0.81	0.000726
8162388	OMD	osteomodulin	chr9	-0.81	0.0017
8145669	RBPMS	RNA binding protein with multiple splicing	chr8	-0.81	0.00483
8104035	SORBS2	sorbin and SH3 domain containing 2	chr4	-0.82	0.000111
7981988	SNORD116-20 /// SNORD116@	small nucleolar RNA, C/D box 116-20 /// small nucleolar RNA, C/D box 116 cluster	chr15	-0.82	0.000318
8129804	MAP3K5	mitogen-activated protein kinase kinase kinase 5	chr6	-0.82	0.000526
7981976	SNORD116-14	small nucleolar RNA, C/D box 116-14	chr15	-0.82	0.000527
8169389	PAK3	p21 protein (Cdc42/Rac)-activated kinase 3	chrX	-0.82	0.00263
7922846	FAM129A	family with sequence similarity 129, member A	chr1	-0.82	0.0041
8089015	PROS1	protein S (alpha)	chr3	-0.83	0.000811
7981996	SNORD116-24	small nucleolar RNA, C/D box 116-24	chr15	-0.83	0.0021
8023696	SERPINB3	serpin peptidase inhibitor, clade B (ovalbumin), member 3	chr18	-0.83	0.0021
8149500	MTUS1	microtubule associated tumor suppressor 1	chr8	-0.84	2.49e-05
7981943	SNORD64 /// PAR5	small nucleolar RNA, C/D box 64 /// Prader-Willi/Angelman syndrome-5	chr15	-0.84	0.000695
7928944	PAPSS2	3'-phosphoadenosine 5'-phosphosulfate synthase 2	chr10	-0.84	0.00172
8142194	LAMB1	laminin, beta 1	chr7	-0.84	0.00495
7931281	FANK1	fibronectin type III and ankyrin repeat domains 1	chr10	-0.85	0.000353
7960947	A2M	alpha-2-macroglobulin	chr12	-0.85	0.00155
8155898	PCSK5	proprotein convertase subtilisin/kexin type 5	chr9	-0.85	0.00479
8127234	LOC100652766 /// DST	dystonin-like /// dystonin	chr6	-0.85	0.00908
7918694	BCL2L15	BCL2-like 15	chr1	-0.85	0.01
8107798	SLC27A6	solute carrier family 27 (fatty acid transporter), member 6	chr5	-0.85	0.01
8123598	SERPINB1	serpin peptidase inhibitor, clade B (ovalbumin), member 1	chr6	-0.86	0.000112
8161288	CNTNAP3B /// CNTNAP3	contactin associated protein-like 3B /// contactin associated protein-like 3	chr9	-0.86	0.000163
8105121	GHR	growth hormone receptor	chr5	-0.86	0.00034
8127498	MIR30C2	microRNA 30c-2	chr6	-0.86	0.00204
8078330	RBMS3	RNA binding motif, single stranded interacting protein 3	chr3	-0.86	0.00272
7925929	---	---	chr10	-0.86	0.00523
8152512	TNFRSF11B	tumor necrosis factor receptor superfamily, member 11b	chr8	-0.86	0.01
8111019	DNAH5	dynein, axonemal, heavy chain 5	chr5	-0.86	0.01
8089011	PROS1	protein S (alpha)	chr3	-0.87	0.00083
8102950	INPP4B	inositol polyphosphate-4-phosphatase, type II, 105kDa	chr4	-0.87	0.00144
8152522	ENPP2	ectonucleotide pyrophosphatase/phosphodiesterase 2	chr8	-0.87	0.0039
8113483	TMEM232	transmembrane protein 232	chr5	-0.87	0.0042
7907286	FMO1	flavin containing monooxygenase 1	chr1	-0.87	0.00488
8095697	CXCL1	chemokine (C-X-C motif) ligand 1 (melanoma growth stimulating activity, alpha)	chr4	-0.87	0.00525
7916506	C1orf168	chromosome 1 open reading frame 168	chr1	-0.87	0.00556
8171205	NLGN4X	neuroligin 4, X-linked	chrX	-0.87	0.00671
8111772	DAB2	disabled homolog 2, mitogen-responsive phosphoprotein (Drosophila)	chr5	-0.88	0.000861
8041644	PLEKHH2	pleckstrin homology domain containing, family H (with MyTH4 domain) member 2	chr2	-0.88	0.00233
8104607	---	---	chr5	-0.89	4.84e-05
8171921	DMD	dystrophin	chrX	-0.89	0.000615
7974902	RHOJ	ras homolog family member J	chr14	-0.89	0.00202
7970954	DCLK1	doublecortin-like kinase 1	chr13	-0.89	0.00665
8145365	DOCK5	dedicator of cytokinesis 5	chr8	-0.9	0.000144
8128991	LAMA4	laminin, alpha 4	chr6	-0.9	0.01
8097628	HHIP	hedgehog interacting protein	chr4	-0.91	0.00187
8073775	FBLN1	fibulin 1	chr22	-0.91	0.00219
8096415	MMRN1	multimerin 1	chr4	-0.91	0.00792
8152119	NCALD	neurocalcin delta	chr8	-0.91	0.01
8155460	CNTNAP3B /// CNTNAP3	contactin associated protein-like 3B /// contactin associated protein-like 3	chr9	-0.92	0.000179
7981992	LOC100506948 /// SNORD116-28 /// SNORD115-26 /// SNORD115-13 /// SNORD115-7 /// SNORD107 /// SNORD116-22	uncharacterized LOC100506948 /// small nucleolar RNA, C/D box 116-28 /// small nucleolar RNA, C/D box 115-26 /// small nucleolar RNA, C/D box 115-13 /// small nucleolar RNA, C/D box 115-7 /// small nucleolar RNA, C/D box 107 /// small nucleolar RNA, C/D box 116-22	chr15	-0.93	4.06e-05
7981945	LOC100506965	uncharacterized LOC100506965	chr15	-0.94	7.62e-05
7981949	SNORD116-1	small nucleolar RNA, C/D box 116-1	chr15	-0.94	0.000133
7959102	HSPB8	heat shock 22kDa protein 8	chr12	-0.94	0.000176
8135734	CPED1	cadherin-like and PC-esterase domain containing 1	chr7	-0.94	0.00829
7923043	KCNT2	potassium channel, subfamily T, member 2	chr1	-0.95	0.00422
7944803	VWA5A	von Willebrand factor A domain containing 5A	chr11	-0.96	1.19e-06
8149555	PSD3	pleckstrin and Sec7 domain containing 3	chr8	-0.96	0.000573
7972217	SPRY2	sprouty homolog 2 (Drosophila)	chr13	-0.96	0.00102
8077899	PPARG	peroxisome proliferator-activated receptor gamma	chr3	-0.96	0.00468
7986350	ARRDC4	arrestin domain containing 4	chr15	-0.97	0.000242
7926410	MRC1	mannose receptor, C type 1	chr10	-0.97	0.00115
7926451	MRC1	mannose receptor, C type 1	chr10	-0.97	0.00115
7982066	SNORD115-6 /// SNORD115-30 /// SNORD115-42	small nucleolar RNA, C/D box 115-6 /// small nucleolar RNA, C/D box 115-30 /// small nucleolar RNA, C/D box 115-42	chr15	-0.97	0.00219
8147796	---	---	chr8	-0.98	0.00054
7962250	CPNE8	copine VIII	chr12	-0.98	0.000578
7925320	NID1	nidogen 1	chr1	-0.98	0.00939
8126853	PTCHD4	patched domain containing 4	chr6	-0.99	0.000478
8003814	ASPA	aspartoacylase	chr17	-0.99	0.000913
8101260	ANTXR2	anthrax toxin receptor 2	chr4	-0.99	0.00332
8094520	PCDH7	protocadherin 7	chr4	-1.01	0.000533
8056184	ITGB6	integrin, beta 6	chr2	-1.01	0.01
8059680	HTR2B	5-hydroxytryptamine (serotonin) receptor 2B, G protein-coupled	chr2	-1.01	0.01
8091715	LXN	latexin	chr3	-1.01	0.01
7971565	LPAR6	lysophosphatidic acid receptor 6	chr13	-1.02	9.14e-05
8101587	MAPK10	mitogen-activated protein kinase 10	chr4	-1.02	0.00171
7940237	MS4A4A	membrane-spanning 4-domains, subfamily A, member 4A	chr11	-1.02	0.00695
7917875	F3	coagulation factor III (thromboplastin, tissue factor)	chr1	-1.03	0.000863
8151816	GEM	GTP binding protein overexpressed in skeletal muscle	chr8	-1.03	0.00396
8103951	ACSL1	acyl-CoA synthetase long-chain family member 1	chr4	-1.03	0.00407
8131550	SCIN	scinderin	chr7	-1.03	0.00647
8131803	IL6	interleukin 6 (interferon, beta 2)	chr7	-1.03	0.01
8057394	SESTD1	SEC14 and spectrin domains 1	chr2	-1.04	6.7e-05
8145685	---	---	chr8	-1.04	0.00521
8101659	SPARCL1	SPARC-like 1 (hevin)	chr4	-1.04	0.00842
7951437	GUCY1A2	guanylate cyclase 1, soluble, alpha 2	chr11	-1.06	0.000642
8149097	DEFB1	defensin, beta 1	chr8	-1.06	0.01
8099504	---	---	chr4	-1.06	0.01
7982070	SNORD115-32	small nucleolar RNA, C/D box 115-32	chr15	-1.07	0.00125
8102792	PCDH18	protocadherin 18	chr4	-1.07	0.00468
7935188	SORBS1	sorbin and SH3 domain containing 1	chr10	-1.07	0.00906
7982056	SNORD115-25	small nucleolar RNA, C/D box 115-25	chr15	-1.07	0.01
8161892	GNA14	guanine nucleotide binding protein (G protein), alpha 14	chr9	-1.07	0.01
7927681	BICC1	bicaudal C homolog 1 (Drosophila)	chr10	-1.09	0.000423
8149574	CSGALNACT1	chondroitin sulfate N-acetylgalactosaminyltransferase 1	chr8	-1.09	0.00356
8155849	ANXA1	annexin A1	chr9	-1.1	0.000952
7979133	NID2	nidogen 2 (osteonidogen)	chr14	-1.11	0.00384
8108693	---	---	chr5	-1.12	0.00128
7951662	CRYAB	crystallin, alpha B	chr11	-1.12	0.00435
8121949	LAMA2	laminin, alpha 2	chr6	-1.13	0.000832
8155487	KGFLP1 /// FGF7	fibroblast growth factor 7 pseudogene /// fibroblast growth factor 7	chr9	-1.13	0.00458
8161423	KGFLP1 /// FGF7	fibroblast growth factor 7 pseudogene /// fibroblast growth factor 7	chr9	-1.13	0.00458
8161455	KGFLP1 /// FGF7	fibroblast growth factor 7 pseudogene /// fibroblast growth factor 7	chr9	-1.13	0.00458
8105267	ITGA2	integrin, alpha 2 (CD49B, alpha 2 subunit of VLA-2 receptor)	chr5	-1.14	0.000126
8047300	AOX1	aldehyde oxidase 1	chr2	-1.14	0.00194
8120967	NT5E	5'-nucleotidase, ecto (CD73)	chr6	-1.14	0.00402
7983630	FGF7	fibroblast growth factor 7	chr15	-1.14	0.01
8095021	SPATA18	spermatogenesis associated 18	chr4	-1.15	1.75e-05
7957688	C12orf63	chromosome 12 open reading frame 63	chr12	-1.15	0.01
7908351	PLA2G4A	phospholipase A2, group IVA (cytosolic, calcium-dependent)	chr1	-1.15	0.01
7909371	CR1	complement component (3b/4b) receptor 1 (Knops blood group)	chr1	-1.16	0.000244
8127502	LINC00472	long intergenic non-protein coding RNA 472	chr6	-1.16	0.000824
8141094	PDK4	pyruvate dehydrogenase kinase, isozyme 4	chr7	-1.16	0.00109
8067839	---	---	chr21	-1.16	0.00584
7982046	SNORD115-5 /// SNORD115-12 /// SNORD115-9 /// SNORD115-43 /// SNORD115-36 /// SNORD115-29 /// SNORD115-11 /// SNORD115-19 /// SNORD115-18 /// SNORD115-17 /// SNORD115-20	small nucleolar RNA, C/D box 115-5 /// small nucleolar RNA, C/D box 115-12 /// small nucleolar RNA, C/D box 115-9 /// small nucleolar RNA, C/D box 115-43 /// small nucleolar RNA, C/D box 115-36 /// small nucleolar RNA, C/D box 115-29 /// small nucleolar RNA, C/D box 115-11 /// small nucleolar RNA, C/D box 115-19 /// small nucleolar RNA, C/D box 115-18 /// small nucleolar RNA, C/D box 115-17 /// s…	chr15	-1.16	0.01
7983910	AQP9	aquaporin 9	chr15	-1.17	0.00505
8155359	CNTNAP3B /// CNTNAP3	contactin associated protein-like 3B /// contactin associated protein-like 3	chr9	-1.21	2.4e-05
8015133	KRT23	keratin 23 (histone deacetylase inducible)	chr17	-1.21	0.0033
8046906	GULP1	GULP, engulfment adaptor PTB domain containing 1	chr2	-1.23	2.35e-05
8102831	MGARP	mitochondria-localized glutamic acid-rich protein	chr4	-1.24	0.01
8007931	ITGB3	integrin, beta 3 (platelet glycoprotein IIIa, antigen CD61)	chr17	-1.25	0.00232
8172043	SRPX	sushi-repeat containing protein, X-linked	chrX	-1.27	0.0045
7970392	---	---	chr13	-1.28	0.01
8155540	CNTNAP3B /// CNTNAP3	contactin associated protein-like 3B /// contactin associated protein-like 3	chr9	-1.29	2.11e-05
8161460	CNTNAP3B /// CNTNAP3	contactin associated protein-like 3B /// contactin associated protein-like 3	chr9	-1.29	2.11e-05
8091867	BCHE	butyrylcholinesterase	chr3	-1.3	0.00351
8006594	CCL18	chemokine (C-C motif) ligand 18 (pulmonary and activation-regulated)	chr17	-1.3	0.00361
8140840	STEAP4	STEAP family member 4	chr7	-1.3	0.01
8007420	AOC3	amine oxidase, copper containing 3 (vascular adhesion protein 1)	chr17	-1.33	0.00424
8098441	ODZ3	odz, odd Oz/ten-m homolog 3 (Drosophila)	chr4	-1.36	0.00212
8099476	PROM1	prominin 1	chr4	-1.36	0.01
8005603	SLC47A1	solute carrier family 47, member 1	chr17	-1.36	0.01
7976496	SERPINA3	serpin peptidase inhibitor, clade A (alpha-1 antiproteinase, antitrypsin), member 3	chr14	-1.37	0.00634
8057599	TFPI	tissue factor pathway inhibitor (lipoprotein-associated coagulation inhibitor)	chr2	-1.38	0.000583
7989750	CILP	cartilage intermediate layer protein, nucleotide pyrophosphohydrolase	chr15	-1.4	0.00038
8017927	ABCA9	ATP-binding cassette, sub-family A (ABC1), member 9	chr17	-1.45	0.00291
8083260	CPA3	carboxypeptidase A3 (mast cell)	chr3	-1.46	0.00119
8009493	KCNJ16	potassium inwardly-rectifying channel, subfamily J, member 16	chr17	-1.46	0.00795
7925531	AKT3	v-akt murine thymoma viral oncogene homolog 3 (protein kinase B, gamma)	chr1	-1.47	8.6e-05
8052355	EFEMP1	EGF containing fibulin-like extracellular matrix protein 1	chr2	-1.49	0.000779
7913216	PLA2G2A	phospholipase A2, group IIA (platelets, synovial fluid)	chr1	-1.52	0.00503
7981068	SERPINA1	serpin peptidase inhibitor, clade A (alpha-1 antiproteinase, antitrypsin), member 1	chr14	-1.53	0.000339
8123744	F13A1	coagulation factor XIII, A1 polypeptide	chr6	-1.56	0.000253
7930714	ATRNL1	attractin-like 1	chr10	-1.56	0.0083
7961514	MGP	matrix Gla protein	chr12	-1.58	0.00295
8113130	MCTP1	multiple C2 domains, transmembrane 1	chr5	-1.58	0.01
8018006	ABCA10	ATP-binding cassette, sub-family A (ABC1), member 10	chr17	-1.59	1.17e-05
8109194	SLC26A2	solute carrier family 26 (sulfate transporter), member 2	chr5	-1.59	0.000685
8154295	IL33	interleukin 33	chr9	-1.61	1.34e-05
7982016	SNORD115-5 /// SNORD115-9 /// SNORD115-11 /// SNORD115-12 /// SNORD115-29 /// SNORD115-36 /// SNORD115-43	small nucleolar RNA, C/D box 115-5 /// small nucleolar RNA, C/D box 115-9 /// small nucleolar RNA, C/D box 115-11 /// small nucleolar RNA, C/D box 115-12 /// small nucleolar RNA, C/D box 115-29 /// small nucleolar RNA, C/D box 115-36 /// small nucleolar RNA, C/D box 115-43	chr15	-1.67	0.00395
7982024	SNORD115-5 /// SNORD115-12 /// SNORD115-9 /// SNORD115-43 /// SNORD115-36 /// SNORD115-29 /// SNORD115-11 /// SNORD115-20	small nucleolar RNA, C/D box 115-5 /// small nucleolar RNA, C/D box 115-12 /// small nucleolar RNA, C/D box 115-9 /// small nucleolar RNA, C/D box 115-43 /// small nucleolar RNA, C/D box 115-36 /// small nucleolar RNA, C/D box 115-29 /// small nucleolar RNA, C/D box 115-11 /// small nucleolar RNA, C/D box 115-20	chr15	-1.67	0.00395
7982030	SNORD115-5 /// SNORD115-12 /// SNORD115-9 /// SNORD115-43 /// SNORD115-36 /// SNORD115-29 /// SNORD115-11 /// SNORD115-20	small nucleolar RNA, C/D box 115-5 /// small nucleolar RNA, C/D box 115-12 /// small nucleolar RNA, C/D box 115-9 /// small nucleolar RNA, C/D box 115-43 /// small nucleolar RNA, C/D box 115-36 /// small nucleolar RNA, C/D box 115-29 /// small nucleolar RNA, C/D box 115-11 /// small nucleolar RNA, C/D box 115-20	chr15	-1.67	0.00395
7982050	LOC100506948 /// SNORD116-28 /// SNORD115-26 /// SNORD115-13 /// SNORD115-7 /// SNORD107 /// SNORD115-9 /// SNORD115-11 /// SNORD115-12 /// SNORD115-22 /// SNORD115-29 /// SNORD115-36 /// SNORD115-43	uncharacterized LOC100506948 /// small nucleolar RNA, C/D box 116-28 /// small nucleolar RNA, C/D box 115-26 /// small nucleolar RNA, C/D box 115-13 /// small nucleolar RNA, C/D box 115-7 /// small nucleolar RNA, C/D box 107 /// small nucleolar RNA, C/D box 115-9 /// small nucleolar RNA, C/D box 115-11 /// small nucleolar RNA, C/D box 115-12 /// small nucleolar RNA, C/D box 115-22 /// small nucle…	chr15	-1.67	0.00456
8162373	OGN	osteoglycin	chr9	-1.69	0.00224
7982018	SNORD115-6 /// SNORD115-42	small nucleolar RNA, C/D box 115-6 /// small nucleolar RNA, C/D box 115-42	chr15	-1.7	0.00147
8017964	ABCA6	ATP-binding cassette, sub-family A (ABC1), member 6	chr17	-1.71	0.000965
7982090	SNORD115-4 /// SNORD115-6 /// SNORD115-42	small nucleolar RNA, C/D box 115-4 /// small nucleolar RNA, C/D box 115-6 /// small nucleolar RNA, C/D box 115-42	chr15	-1.71	0.00145
7982028	LOC100506948 /// SNORD116-28 /// SNORD115-26 /// SNORD115-13 /// SNORD115-7 /// SNORD107 /// SNORD115-9 /// SNORD115-11 /// SNORD115-12 /// SNORD115-29 /// SNORD115-36 /// SNORD115-43	uncharacterized LOC100506948 /// small nucleolar RNA, C/D box 116-28 /// small nucleolar RNA, C/D box 115-26 /// small nucleolar RNA, C/D box 115-13 /// small nucleolar RNA, C/D box 115-7 /// small nucleolar RNA, C/D box 107 /// small nucleolar RNA, C/D box 115-9 /// small nucleolar RNA, C/D box 115-11 /// small nucleolar RNA, C/D box 115-12 /// small nucleolar RNA, C/D box 115-29 /// small nucle…	chr15	-1.71	0.00377
7982064	LOC100506948 /// SNORD116-28 /// SNORD115-26 /// SNORD115-13 /// SNORD115-7 /// SNORD107 /// SNORD115-9 /// SNORD115-11 /// SNORD115-12 /// SNORD115-29 /// SNORD115-36 /// SNORD115-43	uncharacterized LOC100506948 /// small nucleolar RNA, C/D box 116-28 /// small nucleolar RNA, C/D box 115-26 /// small nucleolar RNA, C/D box 115-13 /// small nucleolar RNA, C/D box 115-7 /// small nucleolar RNA, C/D box 107 /// small nucleolar RNA, C/D box 115-9 /// small nucleolar RNA, C/D box 115-11 /// small nucleolar RNA, C/D box 115-12 /// small nucleolar RNA, C/D box 115-29 /// small nucle…	chr15	-1.71	0.00377
7982078	LOC100506948 /// SNORD116-28 /// SNORD115-26 /// SNORD115-13 /// SNORD115-7 /// SNORD107 /// SNORD115-9 /// SNORD115-11 /// SNORD115-12 /// SNORD115-29 /// SNORD115-36 /// SNORD115-43	uncharacterized LOC100506948 /// small nucleolar RNA, C/D box 116-28 /// small nucleolar RNA, C/D box 115-26 /// small nucleolar RNA, C/D box 115-13 /// small nucleolar RNA, C/D box 115-7 /// small nucleolar RNA, C/D box 107 /// small nucleolar RNA, C/D box 115-9 /// small nucleolar RNA, C/D box 115-11 /// small nucleolar RNA, C/D box 115-12 /// small nucleolar RNA, C/D box 115-29 /// small nucle…	chr15	-1.71	0.00377
7982092	LOC100506948 /// SNORD116-28 /// SNORD115-26 /// SNORD115-13 /// SNORD115-7 /// SNORD107 /// SNORD115-9 /// SNORD115-11 /// SNORD115-12 /// SNORD115-29 /// SNORD115-36 /// SNORD115-43	uncharacterized LOC100506948 /// small nucleolar RNA, C/D box 116-28 /// small nucleolar RNA, C/D box 115-26 /// small nucleolar RNA, C/D box 115-13 /// small nucleolar RNA, C/D box 115-7 /// small nucleolar RNA, C/D box 107 /// small nucleolar RNA, C/D box 115-9 /// small nucleolar RNA, C/D box 115-11 /// small nucleolar RNA, C/D box 115-12 /// small nucleolar RNA, C/D box 115-29 /// small nucle…	chr15	-1.71	0.00377
7982058	LOC100506948 /// SNORD116-28 /// SNORD115-26 /// SNORD115-13 /// SNORD115-7 /// SNORD107 /// SNORD115-5 /// SNORD115-9 /// SNORD115-11 /// SNORD115-12 /// SNORD115-29 /// SNORD115-36 /// SNORD115-43 /// SNRPN	uncharacterized LOC100506948 /// small nucleolar RNA, C/D box 116-28 /// small nucleolar RNA, C/D box 115-26 /// small nucleolar RNA, C/D box 115-13 /// small nucleolar RNA, C/D box 115-7 /// small nucleolar RNA, C/D box 107 /// small nucleolar RNA, C/D box 115-5 /// small nucleolar RNA, C/D box 115-9 /// small nucleolar RNA, C/D box 115-11 /// small nucleolar RNA, C/D box 115-12 /// small nucleo…	chr15	-1.71	0.00392
7982008	LOC100506948 /// SNORD116-28 /// SNORD115-26 /// SNORD115-13 /// SNORD115-7 /// SNORD107 /// SNORD115-1 /// SNORD115-16 /// SNRPN	uncharacterized LOC100506948 /// small nucleolar RNA, C/D box 116-28 /// small nucleolar RNA, C/D box 115-26 /// small nucleolar RNA, C/D box 115-13 /// small nucleolar RNA, C/D box 115-7 /// small nucleolar RNA, C/D box 107 /// small nucleolar RNA, C/D box 115-1 /// small nucleolar RNA, C/D box 115-16 /// small nuclear ribonucleoprotein polypeptide N	chr15	-1.74	0.000861
7982032	LOC100506948 /// SNORD116-28 /// SNORD115-26 /// SNORD115-13 /// SNORD115-7 /// SNORD107 /// SNORD115-1 /// SNORD115-16 /// SNRPN	uncharacterized LOC100506948 /// small nucleolar RNA, C/D box 116-28 /// small nucleolar RNA, C/D box 115-26 /// small nucleolar RNA, C/D box 115-13 /// small nucleolar RNA, C/D box 115-7 /// small nucleolar RNA, C/D box 107 /// small nucleolar RNA, C/D box 115-1 /// small nucleolar RNA, C/D box 115-16 /// small nuclear ribonucleoprotein polypeptide N	chr15	-1.74	0.000861
7982038	LOC100506948 /// SNORD116-28 /// SNORD115-26 /// SNORD115-13 /// SNORD115-7 /// SNORD107 /// SNORD115-1 /// SNORD115-16 /// SNRPN	uncharacterized LOC100506948 /// small nucleolar RNA, C/D box 116-28 /// small nucleolar RNA, C/D box 115-26 /// small nucleolar RNA, C/D box 115-13 /// small nucleolar RNA, C/D box 115-7 /// small nucleolar RNA, C/D box 107 /// small nucleolar RNA, C/D box 115-1 /// small nucleolar RNA, C/D box 115-16 /// small nuclear ribonucleoprotein polypeptide N	chr15	-1.74	0.000861
8144917	LPL	lipoprotein lipase	chr8	-1.79	0.00274
8162394	ASPN	asporin	chr9	-1.8	0.01
7922976	PTGS2	prostaglandin-endoperoxide synthase 2 (prostaglandin G/H synthase and cyclooxygenase)	chr1	-1.81	6.95e-05
8092970	APOD	apolipoprotein D	chr3	-1.86	0.0079
7946579	LYVE1	lymphatic vessel endothelial hyaluronan receptor 1	chr11	-1.87	0.000161
7982084	LOC100506948 /// SNORD116-28 /// SNORD115-26 /// SNORD115-13 /// SNORD115-7 /// SNORD107 /// SNORD115-9 /// SNORD115-11 /// SNORD115-12 /// SNORD115-29 /// SNORD115-36 /// SNORD115-39 /// SNORD115-43	uncharacterized LOC100506948 /// small nucleolar RNA, C/D box 116-28 /// small nucleolar RNA, C/D box 115-26 /// small nucleolar RNA, C/D box 115-13 /// small nucleolar RNA, C/D box 115-7 /// small nucleolar RNA, C/D box 107 /// small nucleolar RNA, C/D box 115-9 /// small nucleolar RNA, C/D box 115-11 /// small nucleolar RNA, C/D box 115-12 /// small nucleolar RNA, C/D box 115-29 /// small nucle…	chr15	-1.89	0.00223
8138392	AGR3	anterior gradient 3 homolog (Xenopus laevis)	chr7	-1.89	0.01
7999674	MYH11	myosin, heavy chain 11, smooth muscle	chr16	-1.96	0.01
8091799	SPTSSB	serine palmitoyltransferase, small subunit B	chr3	-2	0.01
8017885	ABCA8	ATP-binding cassette, sub-family A (ABC1), member 8	chr17	-2.01	0.000121
7909494	SYT14	synaptotagmin XIV	chr1	-2.01	0.01
8155802	GDA	guanine deaminase	chr9	-2.04	0.01
8098060	RXFP1	relaxin/insulin-like family peptide receptor 1	chr4	-2.43	0.00148
8126905	CRISP3	cysteine-rich secretory protein 3	chr6	-3.03	0.01

## Sheet: DEGs of disease matched EOCs
Zhang et al. Supplementary Table 2. Differentially expressed genes of all GDHO(+) EOC vs. GDHO(‒) EOC (P≤0.01)
Affymetrix HG 1.0ST Arrays
				Disease-Matched
Probe_ID	Gene Symbol	Gene Title	chr	GDHO(+) vs. GDHO(−)
				Log2	p-value
8175353	CT45A2 /// CT45A4 /// CT45A6 /// CT45A1 /// CT45A3 /// CT45A5	cancer/testis antigen family 45, member A2 /// cancer/testis antigen family 45, member A4 /// cancer/testis antigen family 45, member A6 /// cancer/testis antigen family 45, member A1 /// cancer/testis antigen family 45, member A3 /// cancer/testis antigen family 45, member A5	chrX	4.31	0.000143748
8170052	CT45A1 /// CT45A3 /// CT45A2 /// CT45A6 /// CT45A4 /// CT45A5	cancer/testis antigen family 45, member A1 /// cancer/testis antigen family 45, member A3 /// cancer/testis antigen family 45, member A2 /// cancer/testis antigen family 45, member A6 /// cancer/testis antigen family 45, member A4 /// cancer/testis antigen family 45, member A5	chrX	3.93	0.000195257
8175336	CT45A2 /// CT45A3 /// CT45A4 /// CT45A1 /// CT45A6 /// CT45A5	cancer/testis antigen family 45, member A2 /// cancer/testis antigen family 45, member A3 /// cancer/testis antigen family 45, member A4 /// cancer/testis antigen family 45, member A1 /// cancer/testis antigen family 45, member A6 /// cancer/testis antigen family 45, member A5	chrX	3.85	0.000254912
8170060	CT45A2 /// CT45A4 /// CT45A3 /// CT45A1 /// CT45A6 /// CT45A5	cancer/testis antigen family 45, member A2 /// cancer/testis antigen family 45, member A4 /// cancer/testis antigen family 45, member A3 /// cancer/testis antigen family 45, member A1 /// cancer/testis antigen family 45, member A6 /// cancer/testis antigen family 45, member A5	chrX	3.77	0.000280424
8067208	CTCFL	CCCTC-binding factor (zinc finger protein)-like	chr20	3.55	8.63e-07
8170068	CT45A2 /// CT45A3 /// CT45A4 /// CT45A1 /// CT45A6 /// CT45A5	cancer/testis antigen family 45, member A2 /// cancer/testis antigen family 45, member A3 /// cancer/testis antigen family 45, member A4 /// cancer/testis antigen family 45, member A1 /// cancer/testis antigen family 45, member A6 /// cancer/testis antigen family 45, member A5	chrX	3.47	0.000221879
8175344	CT45A2 /// CT45A4 /// CT45A5 /// CT45A3 /// CT45A6	cancer/testis antigen family 45, member A2 /// cancer/testis antigen family 45, member A4 /// cancer/testis antigen family 45, member A5 /// cancer/testis antigen family 45, member A3 /// cancer/testis antigen family 45, member A6	chrX	3.46	0.000261611
7963817	GTSF1	gametocyte specific factor 1	chr12	2.85	0.000218009
8067305	SYCP2	synaptonemal complex protein 2	chr20	2.5	0.000560515
8167560	GAGE10 /// GAGE12D /// GAGE12H /// GAGE12E /// GAGE12C /// GAGE2D /// GAGE12J /// GAGE12G /// GAGE13 /// GAGE8 /// GAGE2E /// GAGE12B /// GAGE12B /// GAGE12F /// GAGE12I /// GAGE7 /// GAGE6 /// GAGE5 /// GAGE4 /// GAGE2A /// GAGE2C	G antigen 10 /// G antigen 12D /// G antigen 12H /// G antigen 12E /// G antigen 12C /// G antigen 2D /// G antigen 12J /// G antigen 12G /// G antigen 13 /// G antigen 8 /// G antigen 2E /// G antigen 12B /// G antigen 12B /// G antigen 12F /// G antigen 12I /// G antigen 7 /// G antigen 6 /// G antigen 5 /// G antigen 4 /// G antigen 2A /// G antigen 2C	chrX	2.32	0.01
8055153	POTEE /// POTEF /// POTEI /// POTEJ	POTE ankyrin domain family, member E /// POTE ankyrin domain family, member F /// POTE ankyrin domain family, member I /// POTE ankyrin domain family, member J	chr2	2.03	9.78e-09
8045257	POTEE /// POTEF	POTE ankyrin domain family, member E /// POTE ankyrin domain family, member F	chr2	1.98	1.2e-08
8167482	GAGE2E /// GAGE2D /// GAGE5 /// GAGE2C /// GAGE4 /// GAGE12D /// GAGE12E /// GAGE12B /// GAGE12C /// GAGE12F /// GAGE12G /// GAGE12I /// GAGE7 /// GAGE6 /// GAGE12H /// GAGE2A	G antigen 2E /// G antigen 2D /// G antigen 5 /// G antigen 2C /// G antigen 4 /// G antigen 12D /// G antigen 12E /// G antigen 12B /// G antigen 12C /// G antigen 12F /// G antigen 12G /// G antigen 12I /// G antigen 7 /// G antigen 6 /// G antigen 12H /// G antigen 2A	chrX	1.94	0.01
8167562	---	---	chrX	1.94	0.01
8167577	GAGE5 /// GAGE7 /// GAGE12I /// GAGE12G /// GAGE12F /// GAGE4 /// GAGE6 /// GAGE12D /// GAGE12E /// GAGE12B /// GAGE12C /// GAGE12H /// GAGE12J	G antigen 5 /// G antigen 7 /// G antigen 12I /// G antigen 12G /// G antigen 12F /// G antigen 4 /// G antigen 6 /// G antigen 12D /// G antigen 12E /// G antigen 12B /// G antigen 12C /// G antigen 12H /// G antigen 12J	chrX	1.91	0.01
8167584	GAGE5 /// GAGE7 /// GAGE12I /// GAGE12G /// GAGE12F /// GAGE4 /// GAGE6 /// GAGE12D /// GAGE12E /// GAGE12B /// GAGE12C /// GAGE12H /// GAGE12J	G antigen 5 /// G antigen 7 /// G antigen 12I /// G antigen 12G /// G antigen 12F /// G antigen 4 /// G antigen 6 /// G antigen 12D /// G antigen 12E /// G antigen 12B /// G antigen 12C /// G antigen 12H /// G antigen 12J	chrX	1.91	0.01
8136807	---	---	---	1.89	6.27e-05
8055222	POTEF	POTE ankyrin domain family, member F	chr2	1.88	1.61e-08
8167508	GAGE5 /// GAGE7 /// GAGE12I /// GAGE12G /// GAGE12F /// GAGE4 /// GAGE6 /// GAGE12D /// GAGE12E /// GAGE12B /// GAGE12C /// GAGE12H /// GAGE12J /// GAGE2D	G antigen 5 /// G antigen 7 /// G antigen 12I /// G antigen 12G /// G antigen 12F /// G antigen 4 /// G antigen 6 /// G antigen 12D /// G antigen 12E /// G antigen 12B /// G antigen 12C /// G antigen 12H /// G antigen 12J /// G antigen 2D	chrX	1.85	0.01
8136790	---	---	chr7	1.73	0.00172221
8167526	GAGE1 /// GAGE2C /// GAGE12D /// GAGE12H /// GAGE12E /// GAGE12C /// GAGE2D /// GAGE12J /// GAGE12G /// GAGE2A /// GAGE8	G antigen 1 /// G antigen 2C /// G antigen 12D /// G antigen 12H /// G antigen 12E /// G antigen 12C /// G antigen 2D /// G antigen 12J /// G antigen 12G /// G antigen 2A /// G antigen 8	chrX	1.73	0.01
8167261	SSX4 /// SSX4B	synovial sarcoma, X breakpoint 4 /// synovial sarcoma, X breakpoint 4B	chrX	1.7	0.00246993
7977456	POTEG /// POTEH /// POTEM	POTE ankyrin domain family, member G /// POTE ankyrin domain family, member H /// POTE ankyrin domain family, member M	chr14	1.69	5.16e-08
7917276	LPAR3	lysophosphatidic acid receptor 3	chr1	1.66	0.00113856
8172415	SSX9	synovial sarcoma, X breakpoint 9	chrX	1.66	0.00286256
8046020	SCN2A	sodium channel, voltage-gated, type II, alpha subunit	chr2	1.66	0.00293596
7961626	SLCO1A2	solute carrier organic anion transporter family, member 1A2	chr12	1.62	0.000175123
8045210	CYP4F43P /// LOC440905 /// CYP4F43P /// CYP4F30P	cytochrome P450, family 4, subfamily F, polypeptide 43, pseudogene /// uncharacterized LOC440905 /// cytochrome P450, family 4, subfamily F, polypeptide 43, pseudogene /// cytochrome P450, family 4, subfamily F, polypeptide 30, pseudogene	chr2	1.56	1.26e-07
8140650	SEMA3E	sema domain, immunoglobulin domain (Ig), short basic domain, secreted, (semaphorin) 3E	chr7	1.55	0.00106936
8055214	CYP4F43P /// LOC440905 /// CYP4F43P /// CYP4F30P	cytochrome P450, family 4, subfamily F, polypeptide 43, pseudogene /// uncharacterized LOC440905 /// cytochrome P450, family 4, subfamily F, polypeptide 43, pseudogene /// cytochrome P450, family 4, subfamily F, polypeptide 30, pseudogene	chr2	1.49	2.98e-07
8048205	IGFBP2	insulin-like growth factor binding protein 2, 36kDa	chr2	1.49	2e-06
8027402	CCNE1	cyclin E1	chr19	1.48	8.45e-05
8047910	PTH2R	parathyroid hormone 2 receptor	chr2	1.45	4.32e-06
8136801	PRSS3P2	protease, serine, 3 pseudogene 2	chr7	1.44	0.000384983
8055143	LOC440905	uncharacterized LOC440905	chr2	1.43	1.41e-07
8074170	POTEG /// POTEH /// POTEM	POTE ankyrin domain family, member G /// POTE ankyrin domain family, member H /// POTE ankyrin domain family, member M	chr22	1.43	3.92e-07
8046078	B3GALT1	UDP-Gal:betaGlcNAc beta 1,3-galactosyltransferase, polypeptide 1	chr2	1.4	0.00456918
8067844	LOC100288966 /// POTEB /// POTEC /// POTED	POTE ankyrin domain family member D-like /// POTE ankyrin domain family, member B /// POTE ankyrin domain family, member C /// POTE ankyrin domain family, member D	chr21	1.38	5.28e-07
8139776	---	---	chr7	1.38	0.00876794
7972983	POTEG /// POTEM	POTE ankyrin domain family, member G /// POTE ankyrin domain family, member M	chr14	1.37	3.39e-07
8083233	ZIC1	Zic family member 1	chr3	1.37	0.000324782
8092682	SST	somatostatin	chr3	1.36	0.00809757
8170531	MAGEA4	melanoma antigen family A, 4	chrX	1.35	0.01
8022428	LOC100288966 /// POTEB /// POTEC /// POTED	POTE ankyrin domain family member D-like /// POTE ankyrin domain family, member B /// POTE ankyrin domain family, member C /// POTE ankyrin domain family, member D	chr18	1.33	1.82e-07
8162490	HIATL1	hippocampus abundant transcript-like 1	chr9	1.33	0.000631108
7957458	NTS	neurotensin	chr12	1.33	0.00968459
7986605	LOC100288966 /// POTEB /// POTEC /// POTED	POTE ankyrin domain family member D-like /// POTE ankyrin domain family, member B /// POTE ankyrin domain family, member C /// POTE ankyrin domain family, member D	chr15	1.31	4e-07
8121850	HEY2	hairy/enhancer-of-split related with YRPW motif 2	chr6	1.31	0.000919168
8124380	HIST1H1A	histone cluster 1, H1a	chr6	1.3	0.000348417
8150978	CA8	carbonic anhydrase VIII	chr8	1.3	0.000668638
8061579	TPX2	TPX2, microtubule-associated, homolog (Xenopus laevis)	chr20	1.27	6.79e-07
8105495	PART1	prostate androgen-regulated transcript 1 (non-protein coding)	chr5	1.27	0.00122447
7905308	BNIPL	BCL2/adenovirus E1B 19kD interacting protein like	chr1	1.26	5.12e-05
8134339	PEG10	paternally expressed 10	chr7	1.22	0.00087149
8136795	PRSS1	protease, serine, 1 (trypsin 1)	chr7	1.19	0.00390688
8124388	HIST1H3B /// HIST1H3F /// HIST1H3H /// HIST1H3J /// HIST1H3G /// HIST1H3I /// HIST1H3E /// HIST1H3C /// HIST1H3D /// HIST1H3A	histone cluster 1, H3b /// histone cluster 1, H3f /// histone cluster 1, H3h /// histone cluster 1, H3j /// histone cluster 1, H3g /// histone cluster 1, H3i /// histone cluster 1, H3e /// histone cluster 1, H3c /// histone cluster 1, H3d /// histone cluster 1, H3a	chr6	1.18	0.000573317
8017597	---	---	chr17	1.15	0.00116018
7953383	SCARNA10	small Cajal body-specific RNA 10	chr12	1.14	0.000347606
7998898	CLDN6	claudin 6	chr16	1.14	0.0025352
7929334	CEP55	centrosomal protein 55kDa	chr10	1.13	0.000100221
7971731	ATP7B	ATPase, Cu++ transporting, beta polypeptide	chr13	1.12	0.01
7944834	OR8G2	olfactory receptor, family 8, subfamily G, member 2	chr11	1.11	0.0011272
7968637	CCNA1	cyclin A1	chr13	1.11	0.00288349
8035304	BST2	bone marrow stromal cell antigen 2	chr19	1.1	0.00873122
8088954	---	---	chr3	1.1	0.01
8068570	DSCR8	Down syndrome critical region gene 8	chr21	1.09	0.01
8151432	---	---	chr8	1.07	0.000667663
7915612	PTCH2	patched 2	chr1	1.06	6.23e-05
7953532	ENO2	enolase 2 (gamma, neuronal)	chr12	1.06	0.000639886
8028311	SPINT2	serine peptidase inhibitor, Kunitz type, 2	chr19	1.06	0.00150627
8152812	FAM84B	family with sequence similarity 84, member B	chr8	1.06	0.01
8027348	ZNF730	zinc finger protein 730	chr19	1.03	0.000183695
7973629	REC8	REC8 homolog (yeast)	chr14	1.03	0.000336704
8124531	HIST1H3I /// HIST1H3F /// HIST1H3B /// HIST1H3H /// HIST1H3J /// HIST1H3G /// HIST1H3E /// HIST1H3C /// HIST1H3D /// HIST1H3A	histone cluster 1, H3i /// histone cluster 1, H3f /// histone cluster 1, H3b /// histone cluster 1, H3h /// histone cluster 1, H3j /// histone cluster 1, H3g /// histone cluster 1, H3e /// histone cluster 1, H3c /// histone cluster 1, H3d /// histone cluster 1, H3a	chr6	1.02	0.000567624
7985159	CRABP1	cellular retinoic acid binding protein 1	chr15	1.02	0.00422339
8065412	CST1	cystatin SN	chr20	1.01	0.000169721
7930208	INA	internexin neuronal intermediate filament protein, alpha	chr10	1.01	0.000533095
8124527	HIST1H1B	histone cluster 1, H1b	chr6	1.01	0.000536906
7943892	NCAM1	neural cell adhesion molecule 1	chr11	1.01	0.00126961
8044882	EPB41L5	erythrocyte membrane protein band 4.1 like 5	chr2	1.01	0.00269222
8121911	CENPW	centromere protein W	chr6	1.01	0.00880294
8124440	---	---	chr6	0.99	1.29e-05
7951420	---	---	chr11	0.98	4.14e-05
8027345	ZNF492	zinc finger protein 492	chr19	0.98	0.000387254
7956876	LLPH	LLP homolog, long-term synaptic facilitation (Aplysia)	chr12	0.97	0.000243889
8100464	NMU	neuromedin U	chr4	0.96	0.0076723
7925436	TRNAL45P	transfer RNA leucine 45 (anticodon UAA) pseudogene	chr1	0.94	8.65e-06
7982663	BUB1B	budding uninhibited by benzimidazoles 1 homolog beta (yeast)	chr15	0.94	1.49e-05
8074856	PRAME	preferentially expressed antigen in melanoma	chr22	0.94	4.53e-05
8035249	NR2F6	nuclear receptor subfamily 2, group F, member 6	chr19	0.94	0.000132321
8074606	USP18 /// USP41	ubiquitin specific peptidase 18 /// ubiquitin specific peptidase 41	chr22	0.94	0.00138066
8120838	TTK	TTK protein kinase	chr6	0.94	0.00153452
7967028	RNU4-2	RNA, U4 small nuclear 2	chr12	0.94	0.0025214
8067167	AURKA	aurora kinase A	chr20	0.94	0.00274704
7903592	KIAA1324	KIAA1324	chr1	0.94	0.01
8062766	MYBL2	v-myb myeloblastosis viral oncogene homolog (avian)-like 2	chr20	0.93	0.000176368
7907749	TDRD5	tudor domain containing 5	chr1	0.93	0.00150645
7973002	---	---	chr14	0.92	5.69e-06
8022711	DSC2	desmocollin 2	chr18	0.92	0.00926445
7960340	FOXM1	forkhead box M1	chr12	0.91	6.62e-05
8121405	C6orf183 /// C6orf183	chromosome 6 open reading frame 183 /// chromosome 6 open reading frame 183	chr6	0.91	0.00832022
8145611	FZD3	frizzled family receptor 3	chr8	0.91	0.00936931
8028194	ZNF382	zinc finger protein 382	chr19	0.9	0.00217438
7906930	NUF2	NUF2, NDC80 kinetochore complex component, homolog (S. cerevisiae)	chr1	0.9	0.00516898
7947248	KIF18A	kinesin family member 18A	chr11	0.88	0.000225507
8079237	KIF15	kinesin family member 15	chr3	0.88	0.00115317
7976350	UNC79	unc-79 homolog (C. elegans)	chr14	0.88	0.00142362
7953351	NCAPD2	non-SMC condensin I complex, subunit D2	chr12	0.87	0.000189229
8162652	CTSL2	cathepsin L2	chr9	0.87	0.0017617
8058238	ALS2CR11	amyotrophic lateral sclerosis 2 (juvenile) chromosome region, candidate 11	chr2	0.87	0.00294291
8100310	---	---	chr4	0.87	0.00725183
7914127	IFI6	interferon, alpha-inducible protein 6	chr1	0.87	0.00824965
8028872	LTBP4	latent transforming growth factor beta binding protein 4	chr19	0.87	0.00855527
8016994	RNF43	ring finger protein 43	chr17	0.86	0.000294296
8063043	UBE2C	ubiquitin-conjugating enzyme E2C	chr20	0.86	0.000439017
8014974	TOP2A	topoisomerase (DNA) II alpha 170kDa	chr17	0.85	0.00103764
8117368	HIST1H4C /// HIST2H4B /// HIST4H4 /// HIST2H4A /// HIST1H4L /// HIST1H4E /// HIST1H4B /// HIST1H4H /// HIST1H4J /// HIST1H4K /// HIST1H4F /// HIST1H4D /// HIST1H4A /// HIST1H4I	histone cluster 1, H4c /// histone cluster 2, H4b /// histone cluster 4, H4 /// histone cluster 2, H4a /// histone cluster 1, H4l /// histone cluster 1, H4e /// histone cluster 1, H4b /// histone cluster 1, H4h /// histone cluster 1, H4j /// histone cluster 1, H4k /// histone cluster 1, H4f /// histone cluster 1, H4d /// histone cluster 1, H4a /// histone cluster 1, H4i	chr6	0.85	0.00129732
7953218	RAD51AP1	RAD51 associated protein 1	chr12	0.84	0.00014067
8065607	PLAGL2	pleiomorphic adenoma gene-like 2	chr20	0.84	0.000141263
7984540	KIF23	kinesin family member 23	chr15	0.84	0.000369144
8121814	NKAIN2	Na+/K+ transporting ATPase interacting 2	chr6	0.84	0.00400353
7929258	KIF11	kinesin family member 11	chr10	0.83	0.000949521
8044212	SULT1C2	sulfotransferase family, cytosolic, 1C, member 2	chr2	0.83	0.00115525
7983969	CCNB2	cyclin B2	chr15	0.83	0.00242514
8043602	NCAPH	non-SMC condensin I complex, subunit H	chr2	0.82	8.24e-05
8157650	PTGS1	prostaglandin-endoperoxide synthase 1 (prostaglandin G/H synthase and cyclooxygenase)	chr9	0.82	0.000484168
7991406	PRC1	protein regulator of cytokinesis 1	chr15	0.82	0.0018209
7995292	LOC653562 /// SLC6A10P /// SLC6A8	sodium- and chloride-dependent creatine transporter 1-like /// solute carrier family 6 (neurotransmitter transporter, creatine), member 10, pseudogene /// solute carrier family 6 (neurotransmitter transporter, creatine), member 8	chr16	0.82	0.00319001
8172787	SSX2 /// SSX2B	synovial sarcoma, X breakpoint 2 /// synovial sarcoma, X breakpoint 2B	chrX	0.82	0.00495125
8034772	ASF1B	ASF1 anti-silencing function 1 homolog B (S. cerevisiae)	chr19	0.81	0.000278933
8147516	LOC100506558 /// MATN2	uncharacterized LOC100506558 /// matrilin 2	chr8	0.81	0.00889439
7927998	HKDC1	hexokinase domain containing 1	chr10	0.81	0.01
7982757	CASC5	cancer susceptibility candidate 5	chr15	0.8	0.000294479
7979307	DLGAP5	discs, large (Drosophila) homolog-associated protein 5	chr14	0.8	0.00417413
8007071	CDC6	cell division cycle 6 homolog (S. cerevisiae)	chr17	0.8	0.00622865
8047563	---	---	chr2	0.8	0.01
8116952	RNU1-11P	RNA, U1 small nuclear 11, pseudogene	chr6	0.8	0.01
7913852	C1orf135	chromosome 1 open reading frame 135	chr1	0.79	0.000588957
8124534	HIST1H4L /// HIST2H4B /// HIST4H4 /// HIST2H4A /// HIST1H4E /// HIST1H4B /// HIST1H4H /// HIST1H4C /// HIST1H4J /// HIST1H4K /// HIST1H4F /// HIST1H4D /// HIST1H4A /// HIST1H4I	histone cluster 1, H4l /// histone cluster 2, H4b /// histone cluster 4, H4 /// histone cluster 2, H4a /// histone cluster 1, H4e /// histone cluster 1, H4b /// histone cluster 1, H4h /// histone cluster 1, H4c /// histone cluster 1, H4j /// histone cluster 1, H4k /// histone cluster 1, H4f /// histone cluster 1, H4d /// histone cluster 1, H4a /// histone cluster 1, H4i	chr6	0.79	0.00094498
7923086	ASPM	asp (abnormal spindle) homolog, microcephaly associated (Drosophila)	chr1	0.79	0.00111899
8077185	APOA1	apolipoprotein A-I	chr11	0.79	0.00366081
7967030	RNU4-1	RNA, U4 small nuclear 1	chr12	0.79	0.00381578
8071049	LINC00328	long intergenic non-protein coding RNA 328	---	0.79	0.01
8056572	SPC25	SPC25, NDC80 kinetochore complex component, homolog (S. cerevisiae)	chr2	0.78	0.000653772
8124437	HIST1H3F /// HIST1H3B /// HIST1H3H /// HIST1H3J /// HIST1H3G /// HIST1H3I /// HIST1H3E /// HIST1H3C /// HIST1H3D /// HIST1H3A	histone cluster 1, H3f /// histone cluster 1, H3b /// histone cluster 1, H3h /// histone cluster 1, H3j /// histone cluster 1, H3g /// histone cluster 1, H3i /// histone cluster 1, H3e /// histone cluster 1, H3c /// histone cluster 1, H3d /// histone cluster 1, H3a	chr6	0.78	0.000712952
8001082	SLC6A8 /// LOC653562 /// SLC6A10P	solute carrier family 6 (neurotransmitter transporter, creatine), member 8 /// sodium- and chloride-dependent creatine transporter 1-like /// solute carrier family 6 (neurotransmitter transporter, creatine), member 10, pseudogene	chr16	0.78	0.00331967
8124413	HIST1H4D /// HIST2H4B /// HIST4H4 /// HIST2H4A /// HIST1H4L /// HIST1H4E /// HIST1H4B /// HIST1H4H /// HIST1H4C /// HIST1H4J /// HIST1H4K /// HIST1H4F /// HIST1H4A /// HIST1H4I	histone cluster 1, H4d /// histone cluster 2, H4b /// histone cluster 4, H4 /// histone cluster 2, H4a /// histone cluster 1, H4l /// histone cluster 1, H4e /// histone cluster 1, H4b /// histone cluster 1, H4h /// histone cluster 1, H4c /// histone cluster 1, H4j /// histone cluster 1, H4k /// histone cluster 1, H4f /// histone cluster 1, H4a /// histone cluster 1, H4i	chr6	0.78	0.00616197
8035465	ISYNA1	inositol-3-phosphate synthase 1	chr19	0.77	0.00029597
8124391	HIST1H2AB /// HIST1H2AE	histone cluster 1, H2ab /// histone cluster 1, H2ae	chr6	0.77	0.000508543
7961652	---	---	chr12	0.77	0.00764117
7982358	ARHGAP11A	Rho GTPase activating protein 11A	chr15	0.77	0.00932515
7927710	CDK1	cyclin-dependent kinase 1	chr10	0.77	0.01
8089875	POLQ	polymerase (DNA directed), theta	chr3	0.76	0.000126281
8028162	TBCB	tubulin folding cofactor B	chr19	0.76	0.00957839
8117395	HIST1H2BF /// HIST1H2BC /// HIST1H2BI /// HIST1H2BE /// HIST1H2BG	histone cluster 1, H2bf /// histone cluster 1, H2bc /// histone cluster 1, H2bi /// histone cluster 1, H2be /// histone cluster 1, H2bg	chr6	0.76	0.01
7956026	GDF11	growth differentiation factor 11	chr12	0.75	0.000314343
8045275	---	---	chr2	0.75	0.00108325
8117583	---	---	chr6	0.75	0.00339271
7982889	NUSAP1	nucleolar and spindle associated protein 1	chr15	0.75	0.00402685
7942832	C11orf82	chromosome 11 open reading frame 82	chr11	0.75	0.00489661
8174029	TAF7L	TAF7-like RNA polymerase II, TATA box binding protein (TBP)-associated factor, 50kDa	chrX	0.75	0.01
8058857	IGFBP5	insulin-like growth factor binding protein 5	chr2	0.74	0.000983297
8112260	DEPDC1B	DEP domain containing 1B	chr5	0.74	0.00128616
7947165	SLC5A12	solute carrier family 5 (sodium/glucose cotransporter), member 12	chr11	0.74	0.00229892
8062319	TGIF2	TGFB-induced factor homeobox 2	chr20	0.74	0.00367872
7910915	CHRM3	cholinergic receptor, muscarinic 3	chr1	0.74	0.00393004
8028705	TIMM50	translocase of inner mitochondrial membrane 50 homolog (S. cerevisiae)	chr19	0.74	0.01
8019631	RNU2-1 /// RNU2-2 /// WDR74	RNA, U2 small nuclear 1 /// RNA, U2 small nuclear 2 /// WD repeat domain 74	---	0.74	0.01
8019633	RNU2-1 /// RNU2-2 /// WDR74	RNA, U2 small nuclear 1 /// RNA, U2 small nuclear 2 /// WD repeat domain 74	---	0.74	0.01
8019635	RNU2-1 /// RNU2-2 /// WDR74	RNA, U2 small nuclear 1 /// RNA, U2 small nuclear 2 /// WD repeat domain 74	---	0.74	0.01
8019637	RNU2-1 /// RNU2-2 /// WDR74	RNA, U2 small nuclear 1 /// RNA, U2 small nuclear 2 /// WD repeat domain 74	---	0.74	0.01
8019639	RNU2-1 /// RNU2-2 /// WDR74	RNA, U2 small nuclear 1 /// RNA, U2 small nuclear 2 /// WD repeat domain 74	---	0.74	0.01
8019641	RNU2-1 /// RNU2-2 /// WDR74	RNA, U2 small nuclear 1 /// RNA, U2 small nuclear 2 /// WD repeat domain 74	---	0.74	0.01
8019703	RNU2-1 /// RNU2-2 /// WDR74	RNA, U2 small nuclear 1 /// RNA, U2 small nuclear 2 /// WD repeat domain 74	---	0.74	0.01
8019705	RNU2-1 /// RNU2-2 /// WDR74	RNA, U2 small nuclear 1 /// RNA, U2 small nuclear 2 /// WD repeat domain 74	---	0.74	0.01
8019707	RNU2-1 /// RNU2-2 /// WDR74	RNA, U2 small nuclear 1 /// RNA, U2 small nuclear 2 /// WD repeat domain 74	---	0.74	0.01
7977452	---	---	chr14	0.73	6.9e-05
7901010	KIF2C	kinesin family member 2C	chr1	0.73	0.000679696
8028656	PLEKHG2	pleckstrin homology domain containing, family G (with RhoGef domain) member 2	chr19	0.73	0.00144368
8058498	FZD5	frizzled family receptor 5	chr2	0.73	0.00190148
7898693	ALPL	alkaline phosphatase, liver/bone/kidney	chr1	0.73	0.00252449
8013660	ALDOC	aldolase C, fructose-bisphosphate	chr17	0.73	0.00421112
8083941	ECT2	epithelial cell transforming sequence 2 oncogene	chr3	0.73	0.0056249
7934026	DNA2	DNA replication helicase 2 homolog (yeast)	chr10	0.73	0.00607419
8156905	TMEFF1 /// MSANTD3-TMEFF1	transmembrane protein with EGF-like and two follistatin-like domains 1 /// MSANTD3-TMEFF1 readthrough	chr9	0.73	0.00836208
8027793	LSR	lipolysis stimulated lipoprotein receptor	chr19	0.73	0.01
8019802	---	---	---	0.73	0.01
7987636	OIP5	Opa interacting protein 5	chr15	0.72	4.28e-05
8146900	XKR9	XK, Kell blood group complex subunit-related family, member 9	chr8	0.72	0.00136406
7937020	MKI67	antigen identified by monoclonal antibody Ki-67	chr10	0.72	0.00141727
8124518	HIST1H2AJ	histone cluster 1, H2aj	chr6	0.72	0.00299045
7950534	WNT11	wingless-type MMTV integration site family, member 11	chr11	0.72	0.00426758
8167728	SSX2 /// SSX2B	synovial sarcoma, X breakpoint 2 /// synovial sarcoma, X breakpoint 2B	chrX	0.72	0.01
8074168	---	---	chr22	0.71	7.19e-05
7963313	GALNT6	UDP-N-acetyl-alpha-D-galactosamine:polypeptide N-acetylgalactosaminyltransferase 6 (GalNAc-T6)	chr12	0.71	0.000185029
8150101	---	---	chr8	0.71	0.00202507
7951865	APOA1	apolipoprotein A-I	chr11	0.71	0.00675497
8026875	SNORA68	small nucleolar RNA, H/ACA box 68	chr19	0.71	0.00728996
8172395	---	---	chrX	0.71	0.01
7915472	SLC2A1	solute carrier family 2 (facilitated glucose transporter), member 1	chr1	0.71	0.01
8161444	---	---	chr9	0.71	0.01
7994109	PLK1	polo-like kinase 1	chr16	0.7	0.00040535
7896822	AGRN	agrin	chr1	0.7	0.000671662
8085754	SGOL1	shugoshin-like 1 (S. pombe)	chr3	0.7	0.00248775
7927294	ANTXRL /// ANTXRL	anthrax toxin receptor-like /// anthrax toxin receptor-like	chr10	0.7	0.00286518
8112327	CKS1B	CDC28 protein kinase regulatory subunit 1B	chr5	0.7	0.01
8096361	HERC5	HECT and RLD domain containing E3 ubiquitin protein ligase 5	chr4	0.7	0.01
7925904	AKR1E2	aldo-keto reductase family 1, member E2	chr10	0.7	0.01
7900216	AKIRIN1	akirin 1	chr1	0.7	0.01
8019709	RNU2-1 /// RNU2-2 /// WDR74	RNA, U2 small nuclear 1 /// RNA, U2 small nuclear 2 /// WD repeat domain 74	---	0.7	0.01
8180360	---	---	---	0.7	0.01
7949364	CDCA5	cell division cycle associated 5	chr11	0.69	0.000342071
7926715	GPR158	G protein-coupled receptor 158	chr10	0.69	0.0006429
8028851	SHKBP1	SH3KBP1 binding protein 1	chr19	0.69	0.00199991
8053315	LRRTM4	leucine rich repeat transmembrane neuronal 4	chr2	0.69	0.00373492
7926896	CKS1B	CDC28 protein kinase regulatory subunit 1B	chr10	0.69	0.01
8117589	---	---	chr6	0.69	0.01
8179564	KIFC1	kinesin family member C1	chr6	0.68	0.00225348
8124416	HIST1H3D /// HIST1H2AD /// HIST1H3F /// HIST1H3B /// HIST1H3H /// HIST1H3J /// HIST1H3G /// HIST1H3I /// HIST1H3E /// HIST1H3C /// HIST1H3A	histone cluster 1, H3d /// histone cluster 1, H2ad /// histone cluster 1, H3f /// histone cluster 1, H3b /// histone cluster 1, H3h /// histone cluster 1, H3j /// histone cluster 1, H3g /// histone cluster 1, H3i /// histone cluster 1, H3e /// histone cluster 1, H3c /// histone cluster 1, H3a	chr6	0.68	0.00379727
7900699	CDC20	cell division cycle 20 homolog (S. cerevisiae)	chr1	0.68	0.00467369
8039340	TNNT1	troponin T type 1 (skeletal, slow)	chr19	0.68	0.0062776
8034122	SPC24	SPC24, NDC80 kinetochore complex component, homolog (S. cerevisiae)	chr19	0.67	0.00213918
8026698	BABAM1	BRISC and BRCA1 A complex member 1	chr19	0.67	0.00266478
7921099	CRABP2	cellular retinoic acid binding protein 2	chr1	0.67	0.00374441
8111017	---	---	chr5	0.67	0.00441255
8054580	BUB1	budding uninhibited by benzimidazoles 1 homolog (yeast)	chr2	0.67	0.00494603
7939665	MDK	midkine (neurite growth-promoting factor 2)	chr11	0.67	0.00530039
7958031	PARPBP	PARP1 binding protein	chr12	0.67	0.00782229
7900510	CTPS1	CTP synthase 1	chr1	0.67	0.01
8028674	SUPT5H	suppressor of Ty 5 homolog (S. cerevisiae)	chr19	0.67	0.01
7960529	SCNN1A	sodium channel, non-voltage-gated 1 alpha subunit	chr12	0.67	0.01
8084213	---	---	chr3	0.67	0.01
8034974	EPHX3	epoxide hydrolase 3	chr19	0.66	0.00126256
7927915	STOX1	storkhead box 1	chr10	0.66	0.00349409
8117408	HIST1H2AB /// HIST1H2AE	histone cluster 1, H2ab /// histone cluster 1, H2ae	chr6	0.66	0.00484317
8106120	---	---	chr5	0.66	0.00644578
7901497	ZYG11A	zyg-11 homolog A (C. elegans)	chr1	0.66	0.00782049
8028563	MRPS12	mitochondrial ribosomal protein S12	chr19	0.66	0.01
8074192	---	---	chr22	0.66	0.01
8112649	FAM169A	family with sequence similarity 169, member A	chr5	0.66	0.01
8117402	HIST2H4B /// HIST4H4 /// HIST2H4A /// HIST1H4L /// HIST1H4E /// HIST1H4B /// HIST1H4H /// HIST1H4C /// HIST1H4J /// HIST1H4K /// HIST1H4F /// HIST1H4D /// HIST1H4A /// HIST1H4I	histone cluster 2, H4b /// histone cluster 4, H4 /// histone cluster 2, H4a /// histone cluster 1, H4l /// histone cluster 1, H4e /// histone cluster 1, H4b /// histone cluster 1, H4h /// histone cluster 1, H4c /// histone cluster 1, H4j /// histone cluster 1, H4k /// histone cluster 1, H4f /// histone cluster 1, H4d /// histone cluster 1, H4a /// histone cluster 1, H4i	chr6	0.65	0.00302242
8027642	PDCD2L	programmed cell death 2-like	chr19	0.65	0.00801664
8151931	TSPYL5	TSPY-like 5	chr8	0.65	0.00989189
7932765	MPP7	membrane protein, palmitoylated 7 (MAGUK p55 subfamily member 7)	chr10	0.65	0.01
8045319	---	---	chr2	0.65	0.01
8055234	---	---	chr2	0.65	0.01
8141066	PON3	paraoxonase 3	chr7	0.65	0.01
8058342	---	---	chr2	0.64	0.000594499
7946113	OR56A5	olfactory receptor, family 56, subfamily A, member 5	chr11	0.64	0.00403396
7947375	CCDC73	coiled-coil domain containing 73	chr11	0.64	0.00819661
7919269	RNU1-3 /// RNU1-2 /// RNU1-6 /// RNU1-7 /// RNU1-8 /// RNU1-9 /// RNU1-4 /// RNU1-1 /// GSTM2	RNA, U1 small nuclear 3 /// RNA, U1 small nuclear 2 /// RNA, U1 small nuclear 6 /// RNA, U1 small nuclear 7 /// RNA, U1 small nuclear 8 /// RNA, U1 small nuclear 9 /// RNA, U1 small nuclear 4 /// RNA, U1 small nuclear 1 /// glutathione S-transferase mu 2 (muscle)	chr1	0.64	0.01
7919349	RNU1-3 /// RNU1-2 /// RNU1-6 /// RNU1-7 /// RNU1-8 /// RNU1-9 /// RNU1-4 /// RNU1-1 /// GSTM2	RNA, U1 small nuclear 3 /// RNA, U1 small nuclear 2 /// RNA, U1 small nuclear 6 /// RNA, U1 small nuclear 7 /// RNA, U1 small nuclear 8 /// RNA, U1 small nuclear 9 /// RNA, U1 small nuclear 4 /// RNA, U1 small nuclear 1 /// glutathione S-transferase mu 2 (muscle)	chr1	0.64	0.01
7940565	FADS2	fatty acid desaturase 2	chr11	0.64	0.01
7965565	USP44	ubiquitin specific peptidase 44	chr12	0.64	0.01
8117330	HIST1H3A /// HIST1H3F /// HIST1H3B /// HIST1H3H /// HIST1H3J /// HIST1H3G /// HIST1H3I /// HIST1H3E /// HIST1H3C /// HIST1H3D	histone cluster 1, H3a /// histone cluster 1, H3f /// histone cluster 1, H3b /// histone cluster 1, H3h /// histone cluster 1, H3j /// histone cluster 1, H3g /// histone cluster 1, H3i /// histone cluster 1, H3e /// histone cluster 1, H3c /// histone cluster 1, H3d	chr6	0.63	0.00162751
7914807	---	---	chr1	0.63	0.00250515
7982290	---	---	chr15	0.63	0.00655557
7898375	RNU1-5 /// RNU1-3 /// RNU1-2 /// RNU1-7 /// RNU1-8 /// RNU1-4 /// RNU1-1 /// GSTM2	RNA, U1 small nuclear 5 /// RNA, U1 small nuclear 3 /// RNA, U1 small nuclear 2 /// RNA, U1 small nuclear 7 /// RNA, U1 small nuclear 8 /// RNA, U1 small nuclear 4 /// RNA, U1 small nuclear 1 /// glutathione S-transferase mu 2 (muscle)	chr1	0.63	0.00773679
7898411	RNU1-5 /// RNU1-3 /// RNU1-2 /// RNU1-7 /// RNU1-8 /// RNU1-4 /// RNU1-1 /// GSTM2	RNA, U1 small nuclear 5 /// RNA, U1 small nuclear 3 /// RNA, U1 small nuclear 2 /// RNA, U1 small nuclear 7 /// RNA, U1 small nuclear 8 /// RNA, U1 small nuclear 4 /// RNA, U1 small nuclear 1 /// glutathione S-transferase mu 2 (muscle)	chr1	0.63	0.00773679
7912800	RNU1-5 /// RNU1-3 /// RNU1-2 /// RNU1-7 /// RNU1-8 /// RNU1-4 /// RNU1-1 /// GSTM2	RNA, U1 small nuclear 5 /// RNA, U1 small nuclear 3 /// RNA, U1 small nuclear 2 /// RNA, U1 small nuclear 7 /// RNA, U1 small nuclear 8 /// RNA, U1 small nuclear 4 /// RNA, U1 small nuclear 1 /// glutathione S-transferase mu 2 (muscle)	chr1	0.63	0.00773679
7912850	RNU1-5 /// RNU1-3 /// RNU1-2 /// RNU1-7 /// RNU1-8 /// RNU1-4 /// RNU1-1 /// GSTM2	RNA, U1 small nuclear 5 /// RNA, U1 small nuclear 3 /// RNA, U1 small nuclear 2 /// RNA, U1 small nuclear 7 /// RNA, U1 small nuclear 8 /// RNA, U1 small nuclear 4 /// RNA, U1 small nuclear 1 /// glutathione S-transferase mu 2 (muscle)	chr1	0.63	0.00773679
7919576	RNU1-5 /// RNU1-3 /// RNU1-2 /// RNU1-7 /// RNU1-8 /// RNU1-4 /// RNU1-1 /// GSTM2	RNA, U1 small nuclear 5 /// RNA, U1 small nuclear 3 /// RNA, U1 small nuclear 2 /// RNA, U1 small nuclear 7 /// RNA, U1 small nuclear 8 /// RNA, U1 small nuclear 4 /// RNA, U1 small nuclear 1 /// glutathione S-transferase mu 2 (muscle)	chr1	0.63	0.00773679
8167305	EBP	emopamil binding protein (sterol isomerase)	chrX	0.63	0.01
8058256	---	---	chr2	0.63	0.01
7972175	RNY3P3	RNA, Ro-associated Y3 pseudogene 3	chr13	0.63	0.01
8027837	CD22	CD22 molecule	chr19	0.63	0.01
7966878	MIR1178 /// CIT	microRNA 1178 /// citron (rho-interacting, serine/threonine kinase 21)	chr12	0.62	0.000443068
8012958	UBE2S	ubiquitin-conjugating enzyme E2S	chr17	0.62	0.000536087
7923189	KIF14	kinesin family member 14	chr1	0.62	0.00165236
8118669	KIFC1	kinesin family member C1	chr6	0.62	0.0023551
7919612	HIST2H3C /// HIST2H3A /// HIST2H3D	histone cluster 2, H3c /// histone cluster 2, H3a /// histone cluster 2, H3d	chr1	0.62	0.00290246
8063583	RBM38	RNA binding motif protein 38	chr20	0.62	0.003258
7974372	GPR137C	G protein-coupled receptor 137C	chr14	0.62	0.00343492
8035445	JUND	jun D proto-oncogene	chr19	0.62	0.00376738
8047187	CCDC150	coiled-coil domain containing 150	chr2	0.62	0.00406656
8067969	CHODL	chondrolectin	chr21	0.62	0.00592108
7913869	STMN1	stathmin 1	chr1	0.62	0.00664964
8089372	KIAA1524	KIAA1524	chr3	0.62	0.00755232
8102800	SLC7A11	solute carrier family 7 (anionic amino acid transporter light chain, xc- system), member 11	chr4	0.62	0.00778443
8095005	---	---	chr4	0.62	0.00791032
8139699	FLJ45974	uncharacterized LOC401337	chr7	0.62	0.01
7929078	---	---	chr10	0.62	0.01
7985873	C15orf42	chromosome 15 open reading frame 42	chr15	0.61	0.000309609
8124537	HIST1H3F /// HIST1H3B /// HIST1H3H /// HIST1H3J /// HIST1H3G /// HIST1H3I /// HIST1H3E /// HIST1H3C /// HIST1H3D /// HIST1H3A	histone cluster 1, H3f /// histone cluster 1, H3b /// histone cluster 1, H3h /// histone cluster 1, H3j /// histone cluster 1, H3g /// histone cluster 1, H3i /// histone cluster 1, H3e /// histone cluster 1, H3c /// histone cluster 1, H3d /// histone cluster 1, H3a	chr6	0.61	0.000784843
7909708	CENPF	centromere protein F, 350/400kDa (mitosin)	chr1	0.61	0.0050543
8094278	NCAPG	non-SMC condensin I complex, subunit G	chr4	0.61	0.00536614
7970513	SKA3	spindle and kinetochore associated complex subunit 3	chr13	0.61	0.0055212
7973896	RNU1-5 /// RNU1-3 /// RNU1-2 /// RNU1-7 /// RNU1-8 /// RNU1-4 /// RNU1-1 /// GSTM2	RNA, U1 small nuclear 5 /// RNA, U1 small nuclear 3 /// RNA, U1 small nuclear 2 /// RNA, U1 small nuclear 7 /// RNA, U1 small nuclear 8 /// RNA, U1 small nuclear 4 /// RNA, U1 small nuclear 1 /// glutathione S-transferase mu 2 (muscle)	chr14	0.61	0.00947939
7978568	RNU1-5 /// RNU1-3 /// RNU1-2 /// RNU1-7 /// RNU1-8 /// RNU1-4 /// RNU1-1 /// GSTM2	RNA, U1 small nuclear 5 /// RNA, U1 small nuclear 3 /// RNA, U1 small nuclear 2 /// RNA, U1 small nuclear 7 /// RNA, U1 small nuclear 8 /// RNA, U1 small nuclear 4 /// RNA, U1 small nuclear 1 /// glutathione S-transferase mu 2 (muscle)	chr14	0.61	0.00947939
8102787	---	---	chr4	0.61	0.00960559
8168794	CENPI	centromere protein I	chrX	0.61	0.01
8109639	PTTG1	pituitary tumor-transforming 1	chr5	0.61	0.01
7976621	VRK1	vaccinia related kinase 1	chr14	0.61	0.01
8018264	C17orf28	chromosome 17 open reading frame 28	chr17	0.61	0.01
7982792	RAD51	RAD51 homolog (S. cerevisiae)	chr15	0.6	0.000532086
8019857	---	---	chr18	0.6	0.00139179
7955179	TUBA1C	tubulin, alpha 1c	chr12	0.6	0.00591596
7932214	ACBD7	acyl-CoA binding domain containing 7	chr10	0.6	0.00634264
8124385	HIST1H4B /// HIST2H4B /// HIST4H4 /// HIST2H4A /// HIST1H4L /// HIST1H4E /// HIST1H4H /// HIST1H4C /// HIST1H4J /// HIST1H4K /// HIST1H4F /// HIST1H4D /// HIST1H4A /// HIST1H4I	histone cluster 1, H4b /// histone cluster 2, H4b /// histone cluster 4, H4 /// histone cluster 2, H4a /// histone cluster 1, H4l /// histone cluster 1, H4e /// histone cluster 1, H4h /// histone cluster 1, H4c /// histone cluster 1, H4j /// histone cluster 1, H4k /// histone cluster 1, H4f /// histone cluster 1, H4d /// histone cluster 1, H4a /// histone cluster 1, H4i	chr6	0.6	0.00686211
7985829	FANCI	Fanconi anemia, complementation group I	chr15	0.6	0.00913991
8076757	CELSR1	cadherin, EGF LAG seven-pass G-type receptor 1 (flamingo homolog, Drosophila)	chr22	0.6	0.00953893
7942489	DNAJB13	DnaJ (Hsp40) homolog, subfamily B, member 13	chr11	0.6	0.00971753
8073192	UQCRFS1	ubiquinol-cytochrome c reductase, Rieske iron-sulfur polypeptide 1	chr22	0.6	0.01
8173506	ERCC6L	excision repair cross-complementing rodent repair deficiency, complementation group 6-like	chrX	0.6	0.01
8036557	---	---	chr19	0.6	0.01
7955736	ESPL1	extra spindle pole bodies homolog 1 (S. cerevisiae)	chr12	0.59	0.000345322
8034940	NOTCH3	notch 3	chr19	0.59	0.000888178
8168436	---	---	chrX	0.59	0.01
8121532	WISP3	WNT1 inducible signaling pathway protein 3	chr6	0.59	0.01
8036341	ZNF461	zinc finger protein 461	chr19	0.59	0.01
8116780	DSP	desmoplakin	chr6	0.59	0.01
8116932	PHACTR1	phosphatase and actin regulator 1	chr6	0.58	0.000431619
8157229	---	---	chr9	0.58	0.00128643
8065612	C20orf112	chromosome 20 open reading frame 112	chr20	0.58	0.00289735
8028286	SIPA1L3	signal-induced proliferation-associated 1 like 3	chr19	0.58	0.00323789
8139788	---	---	chr7	0.58	0.00409002
7946119	OR56A1	olfactory receptor, family 56, subfamily A, member 1	chr11	0.58	0.00512648
8013015	CENPV	centromere protein V	chr17	0.58	0.00661351
7925918	AKR1C1	aldo-keto reductase family 1, member C1 (dihydrodiol dehydrogenase 1; 20-alpha (3-alpha)-hydroxysteroid dehydrogenase)	chr10	0.58	0.00905423
8124521	HIST1H4J /// HIST2H4B /// HIST4H4 /// HIST2H4A /// HIST1H4L /// HIST1H4E /// HIST1H4B /// HIST1H4H /// HIST1H4C /// HIST1H4K /// HIST1H4F /// HIST1H4D /// HIST1H4A /// HIST1H4I	histone cluster 1, H4j /// histone cluster 2, H4b /// histone cluster 4, H4 /// histone cluster 2, H4a /// histone cluster 1, H4l /// histone cluster 1, H4e /// histone cluster 1, H4b /// histone cluster 1, H4h /// histone cluster 1, H4c /// histone cluster 1, H4k /// histone cluster 1, H4f /// histone cluster 1, H4d /// histone cluster 1, H4a /// histone cluster 1, H4i	chr6	0.58	0.01
8167013	PHF16	PHD finger protein 16	chrX	0.58	0.01
7971690	RN5S29	RNA, 5S ribosomal 29	chr13	0.58	0.01
8007043	RAPGEFL1	Rap guanine nucleotide exchange factor (GEF)-like 1	chr17	0.57	0.00065365
8035868	---	---	chr19	0.57	0.000907542
8075785	FOXRED2	FAD-dependent oxidoreductase domain containing 2	chr22	0.57	0.00133887
8003583	KIF22	kinesin family member 22	chr16	0.57	0.00138227
7923762	KLHDC8A	kelch domain containing 8A	chr1	0.57	0.0016931
7994620	KIF22	kinesin family member 22	chr16	0.57	0.00267426
7918223	HENMT1	HEN1 methyltransferase homolog 1 (Arabidopsis)	chr1	0.57	0.00354019
7899407	SMPDL3B	sphingomyelin phosphodiesterase, acid-like 3B	chr1	0.57	0.00458877
7925662	ZNF695	zinc finger protein 695	chr1	0.57	0.00522788
8062571	FAM83D	family with sequence similarity 83, member D	chr20	0.57	0.00887622
8035905	ANKRD27	ankyrin repeat domain 27 (VPS9 domain)	chr19	0.57	0.00976711
8036309	ZFP82	zinc finger protein 82 homolog (mouse)	chr19	0.57	0.01
8036908	SERTAD3	SERTA domain containing 3	chr19	0.57	0.01
7913896	SLC30A2	solute carrier family 30 (zinc transporter), member 2	chr1	0.57	0.01
8131890	STK31	serine/threonine kinase 31	chr7	0.56	0.00065315
8036351	ZNF850	zinc finger protein 850	chr19	0.56	0.00231024
7960702	CDCA3	cell division cycle associated 3	chr12	0.56	0.00264258
8013671	SPAG5	sperm associated antigen 5	chr17	0.56	0.00270681
8036656	FBXO17 /// SARS2	F-box protein 17 /// seryl-tRNA synthetase 2, mitochondrial	chr19	0.56	0.00303931
7926259	MCM10	minichromosome maintenance complex component 10	chr10	0.56	0.00635044
8008784	PRR11	proline rich 11	chr17	0.56	0.00703632
7932118	BEND7	BEN domain containing 7	chr10	0.56	0.01
8097857	MND1	meiotic nuclear divisions 1 homolog (S. cerevisiae)	chr4	0.56	0.01
7941148	TM7SF2	transmembrane 7 superfamily member 2	chr11	0.56	0.01
7952950	---	---	chr12	0.56	0.01
7980576	---	---	chr14	0.55	0.000625276
8059838	HJURP	Holliday junction recognition protein	chr2	0.55	0.00252831
7955211	DNAJC22	DnaJ (Hsp40) homolog, subfamily C, member 22	chr12	0.55	0.00330635
8121559	---	---	chr6	0.55	0.00421265
7952914	CCDC77	coiled-coil domain containing 77	chr12	0.55	0.00500157
8038347	TEAD2	TEA domain family member 2	chr19	0.55	0.0071269
8071155	USP18	ubiquitin specific peptidase 18	chr22	0.55	0.0074945
7944838	OR8G5	olfactory receptor, family 8, subfamily G, member 5	chr11	0.55	0.00946555
8036436	ZNF607	zinc finger protein 607	chr19	0.55	0.01
7902435	---	---	chr1	0.55	0.01
7961798	SOX5	SRY (sex determining region Y)-box 5	chr12	0.55	0.01
8089729	IGSF11	immunoglobulin superfamily, member 11	chr3	0.55	0.01
7964687	C12orf56	chromosome 12 open reading frame 56	chr12	0.54	0.00138361
8039491	UBE2S	ubiquitin-conjugating enzyme E2S	chr19	0.54	0.00149433
7968484	BRCA2	breast cancer 2, early onset	chr13	0.54	0.00185564
8035236	HAUS8	HAUS augmin-like complex, subunit 8	chr19	0.54	0.00217919
7959025	RNFT2	ring finger protein, transmembrane 2	chr12	0.54	0.00338195
7940530	C11orf9	chromosome 11 open reading frame 9	chr11	0.54	0.00348793
8040712	CENPA /// C2orf18	centromere protein A /// chromosome 2 open reading frame 18	chr2	0.54	0.00531494
7905085	HIST2H3C /// HIST2H3A /// HIST2H3D	histone cluster 2, H3c /// histone cluster 2, H3a /// histone cluster 2, H3d	chr1	0.54	0.00576142
7919614	HIST2H3C /// HIST2H3A /// HIST2H3D	histone cluster 2, H3c /// histone cluster 2, H3a /// histone cluster 2, H3d	chr1	0.54	0.00576142
8053842	GPAT2	glycerol-3-phosphate acyltransferase 2, mitochondrial	chr2	0.54	0.00588873
8168146	KIF4A	kinesin family member 4A	chrX	0.54	0.01
8028084	APLP1	amyloid beta (A4) precursor-like protein 1	chr19	0.54	0.01
8093500	TACC3	transforming, acidic coiled-coil containing protein 3	chr4	0.54	0.01
8027139	RFXANK	regulatory factor X-associated ankyrin-containing protein	chr19	0.54	0.01
8146391	---	---	chr8	0.54	0.01
7980574	---	---	chr14	0.54	0.01
7948088	SLC25A33	solute carrier family 25 (pyrimidine nucleotide carrier), member 33	chr11	0.53	0.00602387
7899502	RNU11	RNA, U11 small nuclear	chr1	0.53	0.00678727
7916403	SSBP3	single stranded DNA binding protein 3	chr1	0.53	0.00682112
8028583	PAK4	p21 protein (Cdc42/Rac)-activated kinase 4	chr19	0.53	0.0086935
7982287	ARHGAP11B /// LOC100288637	Rho GTPase activating protein 11B /// OTU domain containing 7A pseudogene	chr15	0.53	0.00881213
7973724	NYNRIN	NYN domain and retroviral integrase containing	chr14	0.53	0.01
8015412	JUP	junction plakoglobin	chr17	0.53	0.01
8071042	LOC100288884	uncharacterized LOC100288884	chr21	0.52	0.00143863
7964145	TIMELESS	timeless homolog (Drosophila)	chr12	0.52	0.00158531
7897561	KIF1B	kinesin family member 1B	chr1	0.52	0.00868319
7914878	CLSPN	claspin	chr1	0.52	0.00982921
8051275	CAPN13	calpain 13	chr2	0.52	0.01
7957338	SYT1	synaptotagmin I	chr12	0.51	0.00147174
7947189	CCDC34	coiled-coil domain containing 34	chr11	0.51	0.00189029
8117598	HIST2H4B /// HIST4H4 /// HIST2H4A /// HIST1H4L /// HIST1H4E /// HIST1H4B /// HIST1H4H /// HIST1H4C /// HIST1H4J /// HIST1H4K /// HIST1H4F /// HIST1H4D /// HIST1H4A /// HIST1H4I	histone cluster 2, H4b /// histone cluster 4, H4 /// histone cluster 2, H4a /// histone cluster 1, H4l /// histone cluster 1, H4e /// histone cluster 1, H4b /// histone cluster 1, H4h /// histone cluster 1, H4c /// histone cluster 1, H4j /// histone cluster 1, H4k /// histone cluster 1, H4f /// histone cluster 1, H4d /// histone cluster 1, H4a /// histone cluster 1, H4i	chr6	0.51	0.00520327
7904211	VANGL1	vang-like 1 (van gogh, Drosophila)	chr1	0.51	0.00543119
8119444	FOXP4	forkhead box P4	chr6	0.51	0.00549656
7919589	HIST2H3C /// HIST2H3A /// HIST2H3D	histone cluster 2, H3c /// histone cluster 2, H3a /// histone cluster 2, H3d	chr1	0.51	0.00667312
7986068	BLM	Bloom syndrome, RecQ helicase-like	chr15	0.51	0.00793098
8026712	ANKLE1	ankyrin repeat and LEM domain containing 1	chr19	0.51	0.00819035
8129943	---	---	chr6	0.51	0.01
7900365	MFSD2A	major facilitator superfamily domain containing 2A	chr1	0.51	0.01
7961026	LOC728715	ovostatin homolog 2-like	chr12	0.51	0.01
7981911	MKRN3	makorin ring finger protein 3	chr15	0.5	0.00143729
7953409	PTMS	parathymosin	chr12	0.5	0.00887078
8116846	---	---	chr6	0.5	0.00918166
8035156	CHERP	calcium homeostasis endoplasmic reticulum protein	chr19	0.5	0.01
7980044	PNMA1	paraneoplastic Ma antigen 1	chr14	0.5	0.01
7942453	PLEKHB1	pleckstrin homology domain containing, family B (evectins) member 1	chr11	0.5	0.01
7911854	TP73-AS1	TP73 antisense RNA 1 (non-protein coding)	chr1	0.49	0.00123565
8016033	FAM171A2	family with sequence similarity 171, member A2	chr17	0.49	0.00361255
7955195	TROAP	trophinin associated protein (tastin)	chr12	0.49	0.0036963
7946695	RN5S331	RNA, 5S ribosomal 331	chr11	0.49	0.00642499
7896937	ATAD3C	ATPase family, AAA domain containing 3C	chr1	0.49	0.00724784
8012403	AURKB	aurora kinase B	chr17	0.49	0.00730746
7948397	---	---	chr11	0.49	0.00750865
8079422	TDGF1	teratocarcinoma-derived growth factor 1	chr3	0.49	0.0091653
8027439	ZNF507	zinc finger protein 507	chr19	0.49	0.01
7898833	KDM1A	lysine (K)-specific demethylase 1A	chr1	0.49	0.01
7912198	ENO1	enolase 1, (alpha)	chr1	0.49	0.01
8062821	---	---	chr20	0.48	0.00584432
7963157	RACGAP1	Rac GTPase activating protein 1	chr12	0.48	0.00716428
8104504	---	---	chr5	0.48	0.0092251
7900461	ZNF684	zinc finger protein 684	chr1	0.48	0.00948255
7928558	ZMIZ1	zinc finger, MIZ-type containing 1	chr10	0.48	0.00991912
8036242	ALKBH6	alkB, alkylation repair homolog 6 (E. coli)	chr19	0.48	0.01
8026051	RNASEH2A	ribonuclease H2, subunit A	chr19	0.48	0.01
8166723	XK	X-linked Kx blood group (McLeod syndrome)	chrX	0.48	0.01
8167625	CCNB3	cyclin B3	chrX	0.48	0.01
8046560	HOXD3	homeobox D3	chr2	0.48	0.01
8080578	CACNA2D3	calcium channel, voltage-dependent, alpha 2/delta subunit 3	chr3	0.48	0.01
8036689	FBXO27	F-box protein 27	chr19	0.47	0.00562506
7900167	CDCA8	cell division cycle associated 8	chr1	0.47	0.00589192
7897044	PRKCZ	protein kinase C, zeta	chr1	0.47	0.00598223
8117622	OR2B6	olfactory receptor, family 2, subfamily B, member 6	chr6	0.47	0.00662652
8117429	HIST1H2BI /// HIST1H2BC /// HIST1H2BE /// HIST1H2BF /// HIST1H2BG	histone cluster 1, H2bi /// histone cluster 1, H2bc /// histone cluster 1, H2be /// histone cluster 1, H2bf /// histone cluster 1, H2bg	chr6	0.47	0.00814389
7924096	NEK2	NIMA (never in mitosis gene a)-related kinase 2	chr1	0.47	0.00848139
8098423	NEIL3	nei endonuclease VIII-like 3 (E. coli)	chr4	0.47	0.00883935
7921492	IGSF9	immunoglobulin superfamily, member 9	chr1	0.47	0.01
7982712	C15orf23	chromosome 15 open reading frame 23	chr15	0.47	0.01
8005399	ALKBH5 /// LOC100653189 /// LOC100652858	alkB, alkylation repair homolog 5 (E. coli) /// uncharacterized LOC100653189 /// uncharacterized LOC100652858	chr17	0.47	0.01
8163614	---	---	chr9	0.47	0.01
8055171	---	---	chr2	0.47	0.01
7954589	REP15	RAB15 effector protein	chr12	0.47	0.01
8036954	---	---	chr19	0.46	0.00383841
8100476	RN5S361	RNA, 5S ribosomal 361	chr4	0.46	0.0060958
7977450	OR11H12 /// OR11H1 /// OR11H2	olfactory receptor, family 11, subfamily H, member 12 /// olfactory receptor, family 11, subfamily H, member 1 /// olfactory receptor, family 11, subfamily H, member 2	chr14	0.46	0.00760438
7947110	E2F8	E2F transcription factor 8	chr11	0.46	0.00860967
7910997	EXO1	exonuclease 1	chr1	0.46	0.01
8062190	SPAG4	sperm associated antigen 4	chr20	0.46	0.01
7981460	PPP1R13B	protein phosphatase 1, regulatory subunit 13B	chr14	0.46	0.01
8172088	BCOR	BCL6 corepressor	chrX	0.46	0.01
7897339	CAMTA1	calmodulin binding transcription activator 1	chr1	0.45	0.00116048
7983564	SLC12A1	solute carrier family 12 (sodium/potassium/chloride transporters), member 1	chr15	0.45	0.00399547
7963631	RARG	retinoic acid receptor, gamma	chr12	0.45	0.00616891
7973727	NYNRIN	NYN domain and retroviral integrase containing	chr14	0.45	0.00636552
8092654	RPL39L	ribosomal protein L39-like	chr3	0.45	0.00740797
8036483	YIF1B	Yip1 interacting factor homolog B (S. cerevisiae)	chr19	0.45	0.00745395
8135697	ANKRD7	ankyrin repeat domain 7	chr7	0.45	0.00876268
7980338	IRF2BPL	interferon regulatory factor 2 binding protein-like	chr14	0.45	0.01
8083221	PBX2 /// PBX2P1	pre-B-cell leukemia homeobox 2 /// pre-B-cell leukemia homeobox 2 pseudogene 1	chr3	0.45	0.01
8083876	SKIL	SKI-like oncogene	chr3	0.45	0.01
7913385	RAP1GAP	RAP1 GTPase activating protein	chr1	0.45	0.01
8109001	SPINK5	serine peptidase inhibitor, Kazal type 5	chr5	0.44	0.00416406
8159734	CACNA1B	calcium channel, voltage-dependent, N type, alpha 1B subunit	chr9	0.44	0.0048485
7978114	EMC9	ER membrane protein complex subunit 9	chr14	0.44	0.00706625
8040578	CENPO	centromere protein O	chr2	0.44	0.01
8036276	POLR2I	polymerase (RNA) II (DNA directed) polypeptide I, 14.5kDa	chr19	0.44	0.01
7949956	MTL5	metallothionein-like 5, testis-specific (tesmin)	chr11	0.44	0.01
8172453	TIMM17B	translocase of inner mitochondrial membrane 17 homolog B (yeast)	chrX	0.44	0.01
7932492	C10orf113	chromosome 10 open reading frame 113	chr10	0.44	0.01
7955142	CACNB3	calcium channel, voltage-dependent, beta 3 subunit	chr12	0.44	0.01
8043393	THNSL2	threonine synthase-like 2 (S. cerevisiae)	chr2	0.43	0.0076671
7977761	SALL2	sal-like 2 (Drosophila)	chr14	0.43	0.00873804
8027728	HPN	hepsin	chr19	0.43	0.00908143
8015955	ATXN7L3	ataxin 7-like 3	chr17	0.43	0.00912391
7903632	CELSR2	cadherin, EGF LAG seven-pass G-type receptor 2 (flamingo homolog, Drosophila)	chr1	0.43	0.01
8117580	HIST1H2AI /// HIST1H2AH /// HIST1H2AG /// HIST1H2AM /// HIST1H2AL /// HIST1H2AK	histone cluster 1, H2ai /// histone cluster 1, H2ah /// histone cluster 1, H2ag /// histone cluster 1, H2am /// histone cluster 1, H2al /// histone cluster 1, H2ak	chr6	0.43	0.01
8133018	ZNF716	zinc finger protein 716	chr7	0.42	0.0047388
7963235	CSRNP2	cysteine-serine-rich nuclear protein 2	chr12	0.42	0.00909176
8180294	---	---	---	0.42	0.0094944
7897460	SLC25A33	solute carrier family 25 (pyrimidine nucleotide carrier), member 33	chr1	0.42	0.01
8125172	EHMT2	euchromatic histone-lysine N-methyltransferase 2	chr6	0.42	0.01
8179884	EHMT2	euchromatic histone-lysine N-methyltransferase 2	chr6	0.42	0.01
7934553	ZNF503	zinc finger protein 503	chr10	0.42	0.01
8123961	TBC1D7	TBC1 domain family, member 7	chr6	0.42	0.01
7899220	ARID1A	AT rich interactive domain 1A (SWI-like)	chr1	0.42	0.01
7994813	ZNF48	zinc finger protein 48	chr16	0.41	0.00897688
7977472	OR11H12 /// OR11H1 /// OR11H2	olfactory receptor, family 11, subfamily H, member 12 /// olfactory receptor, family 11, subfamily H, member 1 /// olfactory receptor, family 11, subfamily H, member 2	chr14	0.41	0.01
8028119	WDR62	WD repeat domain 62	chr19	0.41	0.01
8117900	DDR1 /// MIR4640	discoidin domain receptor tyrosine kinase 1 /// microRNA 4640	chr6	0.41	0.01
8045208	POTEF /// POTEE	POTE ankyrin domain family, member F /// POTE ankyrin domain family, member E	chr2	0.41	0.01
8027956	MLL4	myeloid/lymphoid or mixed-lineage leukemia 4	chr19	0.41	0.01
8119926	TMEM63B	transmembrane protein 63B	chr6	0.41	0.01
8090341	---	---	chr3	0.41	0.01
7954995	RN5S361	RNA, 5S ribosomal 361	chr12	0.41	0.01
7989157	---	---	chr15	0.41	0.01
8081079	---	---	chr3	0.4	0.00170066
8036033	SCGB2B2	secretoglobin, family 2B, member 2	chr19	0.4	0.00374402
8027510	C19orf40	chromosome 19 open reading frame 40	chr19	0.4	0.00446397
8010260	BIRC5	baculoviral IAP repeat containing 5	chr17	0.4	0.00589711
8169928	FAM45B	family with sequence similarity 45, member B (pseudogene)	chrX	0.4	0.00798711
8133042	ZNF679 /// ZNF735	zinc finger protein 679 /// zinc finger protein 735	chr7	0.4	0.01
7914851	CLSPN	claspin	chr1	0.4	0.01
8061919	CBFA2T2	core-binding factor, runt domain, alpha subunit 2; translocated to, 2	chr20	0.4	0.01
7955606	C12orf44	chromosome 12 open reading frame 44	chr12	0.4	0.01
8179184	DDR1 /// MIR4640	discoidin domain receptor tyrosine kinase 1 /// microRNA 4640	chr6	0.4	0.01
8177867	DDR1 /// MIR4640	discoidin domain receptor tyrosine kinase 1 /// microRNA 4640	chr6	0.4	0.01
8117543	HIST1H2AH	histone cluster 1, H2ah	chr6	0.4	0.01
8133477	GTF2IRD1	GTF2I repeat domain containing 1	chr7	0.4	0.01
8175690	MAGEA10	melanoma antigen family A, 10	chrX	0.4	0.01
7913249	PINK1-AS	PINK1 antisense RNA (non-protein coding)	chr1	0.4	0.01
7917739	---	---	chr1	0.4	0.01
8136457	---	---	chr7	0.39	0.00482154
8089820	GPR156	G protein-coupled receptor 156	chr3	0.39	0.01
7967117	OASL	2'-5'-oligoadenylate synthetase-like	chr12	0.39	0.01
8125360	PBX2	pre-B-cell leukemia homeobox 2	chr6	0.39	0.01
8059139	ATG9A	autophagy related 9A	chr2	0.39	0.01
8117389	HIST1H2BE /// HIST1H2BC /// HIST1H2BI /// HIST1H2BF /// HIST1H2BG	histone cluster 1, H2be /// histone cluster 1, H2bc /// histone cluster 1, H2bi /// histone cluster 1, H2bf /// histone cluster 1, H2bg	chr6	0.39	0.01
7997032	CLEC18B /// CLEC18A /// CLEC18C	C-type lectin domain family 18, member B /// C-type lectin domain family 18, member A /// C-type lectin domain family 18, member C	chr16	0.39	0.01
8002713	CLEC18B /// CLEC18A /// CLEC18C	C-type lectin domain family 18, member B /// C-type lectin domain family 18, member A /// C-type lectin domain family 18, member C	chr16	0.39	0.01
8084002	KCNMB2	potassium large conductance calcium-activated channel, subfamily M, beta member 2	chr3	0.39	0.01
7896878	B3GALT6	UDP-Gal:betaGal beta 1,3-galactosyltransferase polypeptide 6	chr1	0.38	0.0075679
8134589	BUD31	BUD31 homolog (S. cerevisiae)	chr7	0.38	0.0077723
7938559	RASSF10	Ras association (RalGDS/AF-6) domain family (N-terminal) member 10	chr11	0.38	0.01
8050894	KIF3C	kinesin family member 3C	chr2	0.38	0.01
8018849	TK1	thymidine kinase 1, soluble	chr17	0.38	0.01
8036763	DYRK1B	dual-specificity tyrosine-(Y)-phosphorylation regulated kinase 1B	chr19	0.38	0.01
8126382	C6orf132	chromosome 6 open reading frame 132	chr6	0.38	0.01
8125887	TEAD3	TEA domain family member 3	chr6	0.38	0.01
8084217	---	---	chr3	0.38	0.01
7994824	---	---	chr16	0.37	0.00899846
7901192	RAD54L	RAD54-like (S. cerevisiae)	chr1	0.37	0.01
7972981	OR11H12 /// OR11H1 /// OR11H2	olfactory receptor, family 11, subfamily H, member 12 /// olfactory receptor, family 11, subfamily H, member 1 /// olfactory receptor, family 11, subfamily H, member 2	chr14	0.37	0.01
8074194	OR11H12 /// OR11H1 /// OR11H2	olfactory receptor, family 11, subfamily H, member 12 /// olfactory receptor, family 11, subfamily H, member 1 /// olfactory receptor, family 11, subfamily H, member 2	chr22	0.37	0.01
8028016	C19orf55	chromosome 19 open reading frame 55	chr19	0.37	0.01
8051989	ATP6V1E2 /// FLJ41757	ATPase, H+ transporting, lysosomal 31kDa, V1 subunit E2 /// uncharacterized LOC440862	chr2	0.36	0.01
8128087	GABRR1	gamma-aminobutyric acid (GABA) A receptor, rho 1	chr6	0.36	0.01
7909102	---	---	chr1	0.36	0.01
7906602	VANGL2	vang-like 2 (van gogh, Drosophila)	chr1	0.36	0.01
7949954	---	---	chr11	0.36	0.01
8043429	---	---	chr2	0.36	0.01
8053720	---	---	chr2	0.36	0.01
8122240	RN5S219	RNA, 5S ribosomal 219	chr6	0.36	0.01
8143749	ZNF467	zinc finger protein 467	chr7	0.35	0.00953076
7940561	FEN1	flap structure-specific endonuclease 1	chr11	0.34	0.01
8158993	---	---	chr9	0.34	0.01
7911720	PEX10	peroxisomal biogenesis factor 10	chr1	0.34	0.01
8117032	---	---	chr6	0.34	0.01
8060835	---	---	chr20	0.33	0.01
8141317	CYP3A4	cytochrome P450, family 3, subfamily A, polypeptide 4	chr7	0.33	0.01
7912343	CASZ1	castor zinc finger 1	chr1	0.32	0.01
7985317	KIAA1199	KIAA1199	chr15	0.32	0.01
7896817	ISG15	ISG15 ubiquitin-like modifier	chr1	0.31	0.01
7954102	---	---	chr12	0.29	0.01
8013525	---	---	chr17	0.28	0.01
8066818	---	---	chr20	0.26	0.00327374
8113427	---	---	chr5	0.26	0.01
8069608	---	---	chr21	0.25	0.00266947
8124036	---	---	chr6	0.25	0.01
8044878	---	---	chr2	0.25	0.01
8165653	ND1	NADH dehydrogenase, subunit 1 (complex I)	chrM	0.24	0.01
7934095	---	---	chr10	0.24	0.01
8097949	---	---	chr4	0.24	0.01
8067197	TRNAL42P	transfer RNA leucine 42 (anticodon UAA) pseudogene	chr20	0.22	0.01
8162996	RN5S292	RNA, 5S ribosomal 292	chr9	0.21	0.00582978
7958844	---	---	chr12	0.21	0.00851269
8070755	---	---	chr21	0.21	0.01
7934093	---	---	chr10	0.2	0.0082105
8170294	---	---	chrX	0.2	0.0095413
7936282	RNU5B-6P	RNA, U5B small nuclear 6, pseudogene	chr10	0.19	0.01
8035901	---	---	chr19	0.16	0.01
7946678	---	---	chr11	-0.32	0.01
8097670	MMAA	methylmalonic aciduria (cobalamin deficiency) cblA type	chr4	-0.32	0.01
7982004	LOC100506948 /// SNORD116-28 /// SNORD115-26 /// SNORD115-13 /// SNORD115-7 /// SNORD107	uncharacterized LOC100506948 /// small nucleolar RNA, C/D box 116-28 /// small nucleolar RNA, C/D box 115-26 /// small nucleolar RNA, C/D box 115-13 /// small nucleolar RNA, C/D box 115-7 /// small nucleolar RNA, C/D box 107	chr15	-0.33	0.01
8109821	RPL10 /// SNORA70	ribosomal protein L10 /// small nucleolar RNA, H/ACA box 70	chr5	-0.35	0.00762865
8115978	UIMC1	ubiquitin interaction motif containing 1	chr5	-0.36	0.01
8169049	TCEAL1	transcription elongation factor A (SII)-like 1	chrX	-0.36	0.01
8180216	---	---	---	-0.36	0.01
8098150	TMA16	translation machinery associated 16 homolog (S. cerevisiae)	chr4	-0.36	0.01
7980742	LOC283588	uncharacterized LOC283588	chr14	-0.36	0.01
8070141	CRYZL1	crystallin, zeta (quinone reductase)-like 1	chr21	-0.37	0.01
8073068	APOBEC3C	apolipoprotein B mRNA editing enzyme, catalytic polypeptide-like 3C	chr22	-0.37	0.01
8068460	MORC3	MORC family CW-type zinc finger 3	chr21	-0.37	0.01
8173892	CHM	choroideremia (Rab escort protein 1)	chrX	-0.37	0.01
8100347	SCFD2	sec1 family domain containing 2	chr4	-0.37	0.01
7986675	NIPA1	non imprinted in Prader-Willi/Angelman syndrome 1	chr15	-0.38	0.01
7996341	PDP2	pyruvate dehyrogenase phosphatase catalytic subunit 2	chr16	-0.38	0.01
8083094	RASA2	RAS p21 protein activator 2	chr3	-0.38	0.01
8180230	---	---	---	-0.38	0.01
8088397	ACOX2	acyl-CoA oxidase 2, branched chain	chr3	-0.39	0.01
7989849	DENND4A	DENN/MADD domain containing 4A	chr15	-0.39	0.01
7911038	ZNF238	zinc finger protein 238	chr1	-0.39	0.01
8173812	HMGN5	high mobility group nucleosome binding domain 5	chrX	-0.39	0.01
8044049	IL18RAP	interleukin 18 receptor accessory protein	chr2	-0.39	0.01
7952522	PUS3	pseudouridylate synthase 3	chr11	-0.39	0.01
8105633	PPWD1	peptidylprolyl isomerase domain and WD repeat containing 1	chr5	-0.4	0.01
7996860	TMCO7	transmembrane and coiled-coil domains 7	chr16	-0.4	0.01
7943442	DYNC2H1	dynein, cytoplasmic 2, heavy chain 1	chr11	-0.4	0.01
8102655	BBS7	Bardet-Biedl syndrome 7	chr4	-0.4	0.01
7908376	RGS18	regulator of G-protein signaling 18	chr1	-0.4	0.01
7997048	DDX19B	DEAD (Asp-Glu-Ala-Asp) box polypeptide 19B	chr16	-0.4	0.01
8044021	IL1RL1	interleukin 1 receptor-like 1	chr2	-0.4	0.01
8175492	ATP11C	ATPase, class VI, type 11C	chrX	-0.4	0.01
8069448	---	---	chr21	-0.4	0.01
7969488	CLN5	ceroid-lipofuscinosis, neuronal 5	chr13	-0.41	0.00972431
8038949	ZNF841	zinc finger protein 841	chr19	-0.41	0.01
8096919	ALPK1	alpha-kinase 1	chr4	-0.41	0.01
8174253	MORF4L2	mortality factor 4 like 2	chrX	-0.41	0.01
8094408	ANAPC4	anaphase promoting complex subunit 4	chr4	-0.42	0.00779439
7943803	DIXDC1	DIX domain containing 1	chr11	-0.42	0.00845166
8168855	ARMCX4	armadillo repeat containing, X-linked 4	chrX	-0.42	0.00857309
8161415	---	---	chr9	-0.42	0.01
7929919	SFXN3	sideroflexin 3	chr10	-0.42	0.01
8134318	CASD1	CAS1 domain containing 1	chr7	-0.42	0.01
8089701	ZBTB20	zinc finger and BTB domain containing 20	chr3	-0.42	0.01
8111533	LMBRD2	LMBR1 domain containing 2	chr5	-0.42	0.01
8094190	CC2D2A	coiled-coil and C2 domain containing 2A	chr4	-0.42	0.01
8106534	PAPD4	PAP associated domain containing 4	chr5	-0.42	0.01
8085665	RFTN1	raftlin, lipid raft linker 1	chr3	-0.42	0.01
8097116	---	---	chr4	-0.42	0.01
8115606	SLU7	SLU7 splicing factor homolog (S. cerevisiae)	chr5	-0.42	0.01
8098463	---	---	chr4	-0.42	0.01
8145702	WRN	Werner syndrome, RecQ helicase-like	chr8	-0.42	0.01
8163775	MEGF9	multiple EGF-like-domains 9	chr9	-0.42	0.01
8173629	ABCB7	ATP-binding cassette, sub-family B (MDR/TAP), member 7	chrX	-0.42	0.01
8150266	LSM1	LSM1 homolog, U6 small nuclear RNA associated (S. cerevisiae)	chr8	-0.42	0.01
8050176	ITGB1BP1	integrin beta 1 binding protein 1	chr2	-0.42	0.01
7996807	ZFP90	zinc finger protein 90 homolog (mouse)	chr16	-0.43	0.00203082
8110032	CREBRF	CREB3 regulatory factor	chr5	-0.43	0.00665763
8150225	RAB11FIP1	RAB11 family interacting protein 1 (class I)	chr8	-0.43	0.00758626
8173615	RLIM	ring finger protein, LIM domain interacting	chrX	-0.43	0.00779728
7968976	LRCH1	leucine-rich repeats and calponin homology (CH) domain containing 1	chr13	-0.43	0.00820564
7970455	CRYL1	crystallin, lambda 1	chr13	-0.43	0.00956855
7981970	SNORD116-11	small nucleolar RNA, C/D box 116-11	chr15	-0.43	0.00994994
8023646	BCL2	B-cell CLL/lymphoma 2	chr18	-0.43	0.01
8145977	PLEKHA2	pleckstrin homology domain containing, family A (phosphoinositide binding specific) member 2	chr8	-0.43	0.01
7981947	SNORD109B /// SNORD109A	small nucleolar RNA, C/D box 109B /// small nucleolar RNA, C/D box 109A	chr15	-0.44	0.00553974
7982098	SNORD109B /// SNORD109A	small nucleolar RNA, C/D box 109B /// small nucleolar RNA, C/D box 109A	chr15	-0.44	0.00553974
8115375	FAM114A2	family with sequence similarity 114, member A2	chr5	-0.44	0.00694924
8120431	PTP4A1	protein tyrosine phosphatase type IVA, member 1	chr6	-0.44	0.01
8161174	GNE	glucosamine (UDP-N-acetyl)-2-epimerase/N-acetylmannosamine kinase	chr9	-0.44	0.01
8161362	KGFLP2 /// KGFLP1	keratinocyte growth factor-like protein 2 /// fibroblast growth factor 7 pseudogene	chr9	-0.44	0.01
8176276	ATRX	alpha thalassemia/mental retardation syndrome X-linked	chrX	-0.44	0.01
7911333	MGC2752 /// LOC100653267 /// LOC100653047 /// LOC100289034 /// LOC100287195 /// RPL23AP4 /// LOC100508047	CENPB DNA-binding domains containing 1 pseudogene /// uncharacterized LOC100653267 /// 60S ribosomal protein L23a-like /// ribosomal protein L23a pseudogene /// 60S ribosomal protein L23a-like /// ribosomal protein L23a pseudogene 4 /// uncharacterized LOC100508047	chr1	-0.44	0.01
8069470	MGC2752 /// LOC100653267 /// LOC100653047 /// LOC100289034 /// LOC100287195 /// RPL23AP4 /// LOC100508047	CENPB DNA-binding domains containing 1 pseudogene /// uncharacterized LOC100653267 /// 60S ribosomal protein L23a-like /// ribosomal protein L23a pseudogene /// 60S ribosomal protein L23a-like /// ribosomal protein L23a pseudogene 4 /// uncharacterized LOC100508047	chr21	-0.44	0.01
7951479	SLN	sarcolipin	chr11	-0.44	0.01
7996393	CBFB	core-binding factor, beta subunit	chr16	-0.44	0.01
8169158	CXorf57	chromosome X open reading frame 57	chrX	-0.44	0.01
8138401	SNX13	sorting nexin 13	chr7	-0.44	0.01
8168472	ATP7A	ATPase, Cu++ transporting, alpha polypeptide	chrX	-0.44	0.01
8150165	FUT10	fucosyltransferase 10 (alpha (1,3) fucosyltransferase)	chr8	-0.45	0.00730597
7950864	ME3	malic enzyme 3, NADP(+)-dependent, mitochondrial	chr11	-0.45	0.00830646
8152666	---	---	chr8	-0.45	0.00937378
8003068	MPHOSPH6	M-phase phosphoprotein 6	chr16	-0.45	0.01
8174322	MORC4	MORC family CW-type zinc finger 4	chrX	-0.45	0.01
8176174	MPP1	membrane protein, palmitoylated 1, 55kDa	chrX	-0.45	0.01
8127396	EYS	eyes shut homolog (Drosophila)	chr6	-0.45	0.01
8102567	PRDM5	PR domain containing 5	chr4	-0.45	0.01
8079153	ABHD5	abhydrolase domain containing 5	chr3	-0.46	0.00342004
8169412	ALG13	asparagine-linked glycosylation 13 homolog (S. cerevisiae)	chrX	-0.46	0.00383105
8168976	GPRASP2 /// ARMCX5-GPRASP2	G protein-coupled receptor associated sorting protein 2 /// ARMCX5-GPRASP2 readthrough	chrX	-0.46	0.00519355
7970892	N4BP2L1	NEDD4 binding protein 2-like 1	chr13	-0.46	0.00533643
7994280	IL4R	interleukin 4 receptor	chr16	-0.46	0.01
8040365	TRIB2	tribbles homolog 2 (Drosophila)	chr2	-0.46	0.01
8112020	MOCS2	molybdenum cofactor synthesis 2	chr5	-0.46	0.01
8056343	COBLL1	COBL-like 1	chr2	-0.46	0.01
8155696	FAM122A	family with sequence similarity 122A	chr9	-0.46	0.01
8035829	---	---	chr19	-0.46	0.01
7902308	FPGT	fucose-1-phosphate guanylyltransferase	chr1	-0.46	0.01
8097792	SNORD73A /// RPS3A	small nucleolar RNA, C/D box 73A /// ribosomal protein S3A	chr4	-0.46	0.01
8094226	FAM200B	family with sequence similarity 200, member B	chr4	-0.46	0.01
8112439	CCDC125	coiled-coil domain containing 125	chr5	-0.47	0.00332961
8144557	MSRA	methionine sulfoxide reductase A	chr8	-0.47	0.00509653
8157214	---	---	chr9	-0.47	0.00537323
8022488	ABHD3	abhydrolase domain containing 3	chr18	-0.47	0.00648829
8168968	GPRASP1	G protein-coupled receptor associated sorting protein 1	chrX	-0.47	0.00674833
8104066	SORBS2	sorbin and SH3 domain containing 2	chr4	-0.47	0.00718163
8130580	SNORA29 /// TCP1	small nucleolar RNA, H/ACA box 29 /// t-complex 1	chr6	-0.47	0.00797166
8104068	---	---	chr4	-0.47	0.01
8059680	HTR2B	5-hydroxytryptamine (serotonin) receptor 2B, G protein-coupled	chr2	-0.47	0.01
8144281	---	---	chr8	-0.47	0.01
8083592	---	---	chr3	-0.47	0.01
8112388	TRIM23	tripartite motif containing 23	chr5	-0.47	0.01
7920123	S100A10	S100 calcium binding protein A10	chr1	-0.47	0.01
8129097	TSPYL1	TSPY-like 1	chr6	-0.47	0.01
8025498	SNORA70 /// RPL10	small nucleolar RNA, H/ACA box 70 /// ribosomal protein L10	chr19	-0.47	0.01
7923516	CYB5R1	cytochrome b5 reductase 1	chr1	-0.47	0.01
8122279	KIAA1244	KIAA1244	chr6	-0.47	0.01
7989073	PRTG	protogenin	chr15	-0.48	0.00263309
7911017	SDCCAG8	serologically defined colon cancer antigen 8	chr1	-0.48	0.00450592
7989365	RORA	RAR-related orphan receptor A	chr15	-0.48	0.00514869
8150988	---	---	chr8	-0.48	0.00744859
8029435	---	---	chr19	-0.48	0.00816821
8001876	NAE1	NEDD8 activating enzyme E1 subunit 1	chr16	-0.48	0.00958405
7905339	GABPB2	GA binding protein transcription factor, beta subunit 2	chr1	-0.48	0.01
8145660	DCTN6	dynactin 6	chr8	-0.48	0.01
8145942	LETM2	leucine zipper-EF-hand containing transmembrane protein 2	chr8	-0.48	0.01
7918474	DRAM2	DNA-damage regulated autophagy modulator 2	chr1	-0.48	0.01
8094556	PGM2	phosphoglucomutase 2	chr4	-0.48	0.01
8105918	GTF2H2D /// GTF2H2 /// GTF2H2B /// GTF2H2C	general transcription factor IIH, polypeptide 2D /// general transcription factor IIH, polypeptide 2, 44kDa /// general transcription factor IIH, polypeptide 2B (pseudogene) /// general transcription factor IIH, polypeptide 2C	chr5	-0.48	0.01
8174767	FAM70A	family with sequence similarity 70, member A	chrX	-0.48	0.01
8112033	ARL15	ADP-ribosylation factor-like 15	chr5	-0.49	0.00505216
8150287	WHSC1L1	Wolf-Hirschhorn syndrome candidate 1-like 1	chr8	-0.49	0.00844048
7911307	LOC100653267 /// LOC100653047 /// LOC100289034 /// LOC100287195 /// MGC2752	uncharacterized LOC100653267 /// 60S ribosomal protein L23a-like /// ribosomal protein L23a pseudogene /// 60S ribosomal protein L23a-like /// CENPB DNA-binding domains containing 1 pseudogene	chr1	-0.49	0.0086305
8094533	DTHD1	death domain containing 1	chr4	-0.49	0.00900753
8091503	GPR171	G protein-coupled receptor 171	chr3	-0.49	0.00975607
8171747	EIF1AX	eukaryotic translation initiation factor 1A, X-linked	chrX	-0.49	0.01
7917530	GBP2	guanylate binding protein 2, interferon-inducible	chr1	-0.49	0.01
8112538	GTF2H2C /// GTF2H2B /// GTF2H2 /// GTF2H2D	general transcription factor IIH, polypeptide 2C /// general transcription factor IIH, polypeptide 2B (pseudogene) /// general transcription factor IIH, polypeptide 2, 44kDa /// general transcription factor IIH, polypeptide 2D	chr5	-0.49	0.01
8177507	GTF2H2C /// GTF2H2B /// GTF2H2 /// GTF2H2D	general transcription factor IIH, polypeptide 2C /// general transcription factor IIH, polypeptide 2B (pseudogene) /// general transcription factor IIH, polypeptide 2, 44kDa /// general transcription factor IIH, polypeptide 2D	chr5	-0.49	0.01
8131927	MPP6	membrane protein, palmitoylated 6 (MAGUK p55 subfamily member 6)	chr7	-0.49	0.01
7909545	TRAF5	TNF receptor-associated factor 5	chr1	-0.5	0.00244214
8176193	F8	coagulation factor VIII, procoagulant component	chrX	-0.5	0.00333496
8177628	CCDC125	coiled-coil domain containing 125	chr5	-0.5	0.00403294
8135211	FAM185A	family with sequence similarity 185, member A	chr7	-0.5	0.00684997
7924499	TLR5	toll-like receptor 5	chr1	-0.5	0.00878813
8154951	GLULP4	glutamate-ammonia ligase (glutamine synthetase) pseudogene 4	chr9	-0.5	0.00880823
8103998	UFSP2	UFM1-specific peptidase 2	chr4	-0.5	0.01
8107532	HSD17B4	hydroxysteroid (17-beta) dehydrogenase 4	chr5	-0.5	0.01
7995994	RSPRY1	ring finger and SPRY domain containing 1	chr16	-0.5	0.01
8170863	SNORA70 /// RPL10	small nucleolar RNA, H/ACA box 70 /// ribosomal protein L10	chrX	-0.5	0.01
8144712	KIAA1456	KIAA1456	chr8	-0.51	0.00019827
8173673	ATRX	alpha thalassemia/mental retardation syndrome X-linked	chrX	-0.51	0.00201747
8106303	POLK	polymerase (DNA directed) kappa	chr5	-0.51	0.00349896
8141363	TRIM4	tripartite motif containing 4	chr7	-0.51	0.00451969
8126770	CYP39A1	cytochrome P450, family 39, subfamily A, polypeptide 1	chr6	-0.51	0.00455047
7981951	SNORD116-2	small nucleolar RNA, C/D box 116-2	chr15	-0.51	0.00682259
8149877	PNMA2	paraneoplastic Ma antigen 2	chr8	-0.51	0.00900471
8155673	PIP5K1B	phosphatidylinositol-4-phosphate 5-kinase, type I, beta	chr9	-0.51	0.00916889
7924450	DUSP10	dual specificity phosphatase 10	chr1	-0.51	0.00974971
7916789	WDR78	WD repeat domain 78	chr1	-0.51	0.01
8173299	EDA2R	ectodysplasin A2 receptor	chrX	-0.51	0.01
7932311	RSU1	Ras suppressor protein 1	chr10	-0.51	0.01
7999553	CPPED1	calcineurin-like phosphoesterase domain containing 1	chr16	-0.51	0.01
8057771	STAT4	signal transducer and activator of transcription 4	chr2	-0.51	0.01
8138361	RPL36A /// RPL36A-HNRNPH2	ribosomal protein L36a /// RPL36A-HNRNPH2 readthrough	chr7	-0.51	0.01
8105970	GTF2H2D /// GTF2H2C /// GTF2H2	general transcription factor IIH, polypeptide 2D /// general transcription factor IIH, polypeptide 2C /// general transcription factor IIH, polypeptide 2, 44kDa	chr5	-0.51	0.01
7908777	---	---	chr1	-0.51	0.01
7996891	CIRH1A	cirrhosis, autosomal recessive 1A (cirhin)	chr16	-0.51	0.01
7942964	TMEM135	transmembrane protein 135	chr11	-0.52	0.00202899
8102050	SLC9B2	solute carrier family 9, subfamily B (NHA2, cation proton antiporter 2), member 2	chr4	-0.52	0.00274888
8074237	CECR1	cat eye syndrome chromosome region, candidate 1	chr22	-0.52	0.00304505
7927649	CISD1	CDGSH iron sulfur domain 1	chr10	-0.52	0.00334889
7945146	KCNJ5	potassium inwardly-rectifying channel, subfamily J, member 5	chr11	-0.52	0.00382715
8111993	FGF10	fibroblast growth factor 10	chr5	-0.52	0.00790145
7971513	ESD	esterase D	chr13	-0.52	0.00919041
7996947	CYB5B	cytochrome b5 type B (outer mitochondrial membrane)	chr16	-0.52	0.00997739
7927658	UBE2D1	ubiquitin-conjugating enzyme E2D 1	chr10	-0.52	0.01
8138789	JAZF1	JAZF zinc finger 1	chr7	-0.52	0.01
8109344	GM2A	GM2 ganglioside activator	chr5	-0.52	0.01
8104570	FAM105A	family with sequence similarity 105, member A	chr5	-0.52	0.01
7970924	STARD13	StAR-related lipid transfer (START) domain containing 13	chr13	-0.53	0.000702415
7978586	CFL2	cofilin 2 (muscle)	chr14	-0.53	0.00530757
8102065	BDH2	3-hydroxybutyrate dehydrogenase, type 2	chr4	-0.53	0.00717873
7951535	KDELC2	KDEL (Lys-Asp-Glu-Leu) containing 2	chr11	-0.53	0.01
8040639	HADHB	hydroxyacyl-CoA dehydrogenase/3-ketoacyl-CoA thiolase/enoyl-CoA hydratase (trifunctional protein), beta subunit	chr2	-0.53	0.01
8154178	JAK2	Janus kinase 2	chr9	-0.53	0.01
8116372	RNF130	ring finger protein 130	chr5	-0.53	0.01
7948332	LPXN	leupaxin	chr11	-0.53	0.01
8046099	NOSTRIN	nitric oxide synthase trafficker	chr2	-0.54	0.000856019
7989193	---	---	chr15	-0.54	0.00128635
7981998	SNORD116-25	small nucleolar RNA, C/D box 116-25	chr15	-0.54	0.00233621
8132013	CHN2	chimerin (chimaerin) 2	chr7	-0.54	0.00240843
8121794	SMPDL3A	sphingomyelin phosphodiesterase, acid-like 3A	chr6	-0.54	0.00362668
8044035	IL18R1	interleukin 18 receptor 1	chr2	-0.54	0.00402712
8145281	SLC25A37	solute carrier family 25 (mitochondrial iron transporter), member 37	chr8	-0.54	0.00444337
8114193	SAR1B	SAR1 homolog B (S. cerevisiae)	chr5	-0.54	0.00616656
8154059	SMARCA2	SWI/SNF related, matrix associated, actin dependent regulator of chromatin, subfamily a, member 2	chr9	-0.54	0.00699143
7988970	FAM214A	family with sequence similarity 214, member A	chr15	-0.54	0.01
8174654	KLHL13	kelch-like 13 (Drosophila)	chrX	-0.54	0.01
8121212	---	---	chr6	-0.54	0.01
8173647	ZDHHC15	zinc finger, DHHC-type containing 15	chrX	-0.54	0.01
7988605	COPS2	COP9 constitutive photomorphogenic homolog subunit 2 (Arabidopsis)	chr15	-0.54	0.01
8020321	---	---	chr18	-0.54	0.01
8149762	TNFRSF10A	tumor necrosis factor receptor superfamily, member 10a	chr8	-0.54	0.01
8168316	OGT	O-linked N-acetylglucosamine (GlcNAc) transferase	chrX	-0.54	0.01
8102440	ARSJ	arylsulfatase family, member J	chr4	-0.54	0.01
8129410	THEMIS	thymocyte selection associated	chr6	-0.54	0.01
8166278	SCML1	sex comb on midleg-like 1 (Drosophila)	chrX	-0.55	0.00116387
8096753	HADH	hydroxyacyl-CoA dehydrogenase	chr4	-0.55	0.00148334
7996954	NFAT5	nuclear factor of activated T-cells 5, tonicity-responsive	chr16	-0.55	0.00194105
8077993	TMEM43	transmembrane protein 43	chr3	-0.55	0.00397697
8008113	CALCOCO2	calcium binding and coiled-coil domain 2	chr17	-0.55	0.00519354
8101648	HSD17B11	hydroxysteroid (17-beta) dehydrogenase 11	chr4	-0.55	0.00655799
8088664	SUCLG2	succinate-CoA ligase, GDP-forming, beta subunit	chr3	-0.55	0.00687701
7910398	RAB4A /// SPHAR	RAB4A, member RAS oncogene family /// S-phase response (cyclin related)	chr1	-0.55	0.00734485
8168087	IGBP1	immunoglobulin (CD79A) binding protein 1	chrX	-0.55	0.0097701
8089714	LSAMP	limbic system-associated membrane protein	chr3	-0.55	0.01
7999476	---	---	chr16	-0.55	0.01
8006531	SLFN5	schlafen family member 5	chr17	-0.55	0.01
8069541	SAMSN1	SAM domain, SH3 domain and nuclear localization signals 1	chr21	-0.55	0.01
8118594	HLA-DPB1	major histocompatibility complex, class II, DP beta 1	chr6	-0.55	0.01
8063444	TSHZ2	teashirt zinc finger homeobox 2	chr20	-0.55	0.01
7957386	ACSS3	acyl-CoA synthetase short-chain family member 3	chr12	-0.55	0.01
7908388	RGS1	regulator of G-protein signaling 1	chr1	-0.55	0.01
8170859	SNORA70 /// RPL10	small nucleolar RNA, H/ACA box 70 /// ribosomal protein L10	chrX	-0.55	0.01
8092177	NCEH1	neutral cholesterol ester hydrolase 1	chr3	-0.55	0.01
7995583	CHD9	chromodomain helicase DNA binding protein 9	chr16	-0.56	0.00333765
8050427	FAM49A	family with sequence similarity 49, member A	chr2	-0.56	0.00378245
7974816	SLC38A6	solute carrier family 38, member 6	chr14	-0.56	0.00535697
7948987	PLA2G16	phospholipase A2, group XVI	chr11	-0.56	0.0069944
7989387	VPS13C	vacuolar protein sorting 13 homolog C (S. cerevisiae)	chr15	-0.56	0.01
8129590	STX7	syntaxin 7	chr6	-0.56	0.01
8060758	PRNP	prion protein	chr20	-0.56	0.01
8168691	DIAPH2	diaphanous homolog 2 (Drosophila)	chrX	-0.57	0.00134091
8096744	CYP2U1	cytochrome P450, family 2, subfamily U, polypeptide 1	chr4	-0.57	0.00194774
7901299	CMPK1	cytidine monophosphate (UMP-CMP) kinase 1, cytosolic	chr1	-0.57	0.00195831
8098611	TLR3	toll-like receptor 3	chr4	-0.57	0.0027393
8108475	IGIP	IgA-inducing protein homolog (Bos taurus)	chr5	-0.57	0.0027807
8060418	SIRPA	signal-regulatory protein alpha	chr20	-0.57	0.00304549
7928471	ADK	adenosine kinase	chr10	-0.57	0.00468298
7989885	LOC646358 /// DNAJB14	DnaJ (Hsp40) homolog, subfamily B, member 14 pseudogene /// DnaJ (Hsp40) homolog, subfamily B, member 14	chr15	-0.57	0.00630373
7959023	MAP1LC3B2 /// MAP1LC3B	microtubule-associated protein 1 light chain 3 beta 2 /// microtubule-associated protein 1 light chain 3 beta	chr12	-0.57	0.00641995
8041179	CLIP4	CAP-GLY domain containing linker protein family, member 4	chr2	-0.57	0.00762523
8144758	ZDHHC2	zinc finger, DHHC-type containing 2	chr8	-0.57	0.00856895
7943349	ARHGAP42	Rho GTPase activating protein 42	chr11	-0.57	0.01
7902594	PRKACB	protein kinase, cAMP-dependent, catalytic, beta	chr1	-0.57	0.01
7957735	MIR135A2	microRNA 135a-2	chr12	-0.57	0.01
8088415	LOC100506924 /// FAM107A	uncharacterized LOC100506924 /// family with sequence similarity 107, member A	chr3	-0.57	0.01
8179519	HLA-DPB1	major histocompatibility complex, class II, DP beta 1	chr6	-0.57	0.01
8142332	IMMP2L	IMP2 inner mitochondrial membrane peptidase-like (S. cerevisiae)	chr7	-0.58	0.000845689
7983734	TMOD2	tropomodulin 2 (neuronal)	chr15	-0.58	0.00208643
8047401	CFLAR	CASP8 and FADD-like apoptosis regulator	chr2	-0.58	0.00314422
7995382	PHKB	phosphorylase kinase, beta	chr16	-0.58	0.00410107
7981943	SNORD64 /// PAR5	small nucleolar RNA, C/D box 64 /// Prader-Willi/Angelman syndrome-5	chr15	-0.58	0.00427667
8171762	RPS6KA3	ribosomal protein S6 kinase, 90kDa, polypeptide 3	chrX	-0.58	0.00437039
8108737	PCDHB13	protocadherin beta 13	chr5	-0.58	0.00645781
8144894	INTS10	integrator complex subunit 10	chr8	-0.58	0.00760852
7943369	TMEM133	transmembrane protein 133	chr11	-0.58	0.00787345
7951372	CASP4	caspase 4, apoptosis-related cysteine peptidase	chr11	-0.58	0.00846436
7951545	EXPH5	exophilin 5	chr11	-0.58	0.01
7918857	TSPAN2	tetraspanin 2	chr1	-0.58	0.01
7921637	CD84	CD84 molecule	chr1	-0.58	0.01
7995806	MT1A	metallothionein 1A	chr16	-0.58	0.01
7929012	STAMBPL1	STAM binding protein-like 1	chr10	-0.59	0.000892497
8105267	ITGA2	integrin, alpha 2 (CD49B, alpha 2 subunit of VLA-2 receptor)	chr5	-0.59	0.00095288
7983922	---	---	chr15	-0.59	0.00753517
8109843	DOCK2	dedicator of cytokinesis 2	chr5	-0.59	0.01
8151952	NIPAL2	NIPA-like domain containing 2	chr8	-0.59	0.01
8118548	HLA-DRA	major histocompatibility complex, class II, DR alpha	chr6	-0.59	0.01
7917304	MCOLN3	mucolipin 3	chr1	-0.59	0.01
8179481	HLA-DRA	major histocompatibility complex, class II, DR alpha	chr6	-0.59	0.01
8178193	HLA-DRA	major histocompatibility complex, class II, DR alpha	chr6	-0.59	0.01
8098637	CYP4V2	cytochrome P450, family 4, subfamily V, polypeptide 2	chr4	-0.6	0.00156047
7982006	SNORD116-29	small nucleolar RNA, C/D box 116-29	chr15	-0.6	0.00198013
8116227	CLK4	CDC-like kinase 4	chr5	-0.6	0.00299357
7938563	ARNTL	aryl hydrocarbon receptor nuclear translocator-like	chr11	-0.6	0.00321779
8162940	ABCA1	ATP-binding cassette, sub-family A (ABC1), member 1	chr9	-0.6	0.00499716
8078270	RPL15	ribosomal protein L15	chr3	-0.6	0.00581079
8083656	MFSD1	major facilitator superfamily domain containing 1	chr3	-0.6	0.00737669
8097903	TLR2	toll-like receptor 2	chr4	-0.6	0.00921194
8096314	PKD2	polycystic kidney disease 2 (autosomal dominant)	chr4	-0.6	0.00930067
8038967	ZNF83	zinc finger protein 83	chr19	-0.6	0.01
8046124	DHRS9	dehydrogenase/reductase (SDR family) member 9	chr2	-0.6	0.01
8067233	PMEPA1	prostate transmembrane protein, androgen induced 1	chr20	-0.6	0.01
8042468	ANXA4	annexin A4	chr2	-0.6	0.01
8166065	TLR8	toll-like receptor 8	chrX	-0.6	0.01
8125556	HLA-DPA1	major histocompatibility complex, class II, DP alpha 1	chr6	-0.6	0.01
8178891	HLA-DPA1	major histocompatibility complex, class II, DP alpha 1	chr6	-0.6	0.01
8149281	---	---	chr8	-0.61	0.000668423
8113010	CCNH	cyclin H	chr5	-0.61	0.000985135
7924107	LPGAT1	lysophosphatidylglycerol acyltransferase 1	chr1	-0.61	0.00221681
8003060	SDR42E1	short chain dehydrogenase/reductase family 42E, member 1	chr16	-0.61	0.00310669
8174474	ACSL4	acyl-CoA synthetase long-chain family member 4	chrX	-0.61	0.0050187
8096160	ARHGAP24	Rho GTPase activating protein 24	chr4	-0.61	0.006049
8012951	CDRT1	CMT1A duplicated region transcript 1	chr17	-0.61	0.00942511
7917532	GBP2	guanylate binding protein 2, interferon-inducible	chr1	-0.61	0.00977029
7947512	PAMR1	peptidase domain containing associated with muscle regeneration 1	chr11	-0.61	0.01
7952601	ETS1	v-ets erythroblastosis virus E26 oncogene homolog 1 (avian)	chr11	-0.61	0.01
7916984	MIR186	microRNA 186	chr1	-0.61	0.01
7961120	CLEC7A	C-type lectin domain family 7, member A	chr12	-0.61	0.01
7981974	SNORD116-13	small nucleolar RNA, C/D box 116-13	chr15	-0.62	0.00120006
8105077	CARD6	caspase recruitment domain family, member 6	chr5	-0.62	0.00135216
7909954	DISP1	dispatched homolog 1 (Drosophila)	chr1	-0.62	0.00139634
8098084	ETFDH	electron-transferring-flavoprotein dehydrogenase	chr4	-0.62	0.00167657
8165866	STS	steroid sulfatase (microsomal), isozyme S	chrX	-0.62	0.00218847
8128698	SESN1	sestrin 1	chr6	-0.62	0.00378006
8110971	CMBL	carboxymethylenebutenolidase homolog (Pseudomonas)	chr5	-0.62	0.0059723
7988644	ATP8B4	ATPase, class I, type 8B, member 4	chr15	-0.62	0.0091795
7990657	TBC1D2B	TBC1 domain family, member 2B	chr15	-0.62	0.00934942
8142120	NAMPTL /// NAMPT	nicotinamide phosphoribosyltransferase-like /// nicotinamide phosphoribosyltransferase	chr7	-0.62	0.00984912
8140556	HGF	hepatocyte growth factor (hepapoietin A; scatter factor)	chr7	-0.62	0.01
7933084	NAMPTL /// NAMPT	nicotinamide phosphoribosyltransferase-like /// nicotinamide phosphoribosyltransferase	chr10	-0.62	0.01
8180100	HLA-DPA1	major histocompatibility complex, class II, DP alpha 1	chr6	-0.62	0.01
8133938	CROT	carnitine O-octanoyltransferase	chr7	-0.63	0.0010764
7902512	DNAJB4	DnaJ (Hsp40) homolog, subfamily B, member 4	chr1	-0.63	0.00246836
8120602	OGFRL1	opioid growth factor receptor-like 1	chr6	-0.63	0.00284451
7916843	GNG12	guanine nucleotide binding protein (G protein), gamma 12	chr1	-0.63	0.0033981
7925257	LYST	lysosomal trafficking regulator	chr1	-0.63	0.0034079
7951397	CASP1	caspase 1, apoptosis-related cysteine peptidase	chr11	-0.63	0.00453289
8149534	ASAH1	N-acylsphingosine amidohydrolase (acid ceramidase) 1	chr8	-0.63	0.01
8174103	GK /// GK3P	glycerol kinase /// glycerol kinase 3 pseudogene	chrX	-0.63	0.01
7906777	FCGR2B	Fc fragment of IgG, low affinity IIb, receptor (CD32)	chr1	-0.63	0.01
8140468	PION	pigeon homolog (Drosophila)	chr7	-0.64	0.00129935
7996345	CES2	carboxylesterase 2	chr16	-0.64	0.00292966
8113483	TMEM232	transmembrane protein 232	chr5	-0.64	0.00403363
8056151	PLA2R1	phospholipase A2 receptor 1, 180kDa	chr2	-0.64	0.00543441
8014066	EVI2A	ecotropic viral integration site 2A	chr17	-0.64	0.00768808
7924307	---	---	chr1	-0.64	0.0098085
8111739	FYB	FYN binding protein	chr5	-0.64	0.01
8169186	TBC1D8B	TBC1 domain family, member 8B (with GRAM domain)	chrX	-0.65	0.000617711
8100003	---	---	chr4	-0.65	0.00145709
8140478	PION	pigeon homolog (Drosophila)	chr7	-0.65	0.00200796
7990757	CTSH	cathepsin H	chr15	-0.65	0.0068017
8109697	CCNG1	cyclin G1	chr5	-0.65	0.00774845
8105348	GPX8	glutathione peroxidase 8 (putative)	chr5	-0.65	0.00815222
8143127	FAM180A	family with sequence similarity 180, member A	chr7	-0.65	0.00936899
7989037	DYX1C1-CCPG1 /// CCPG1	DYX1C1-CCPG1 readthrough (non-protein coding) /// cell cycle progression 1	chr15	-0.65	0.00990468
8091260	SLC9A9	solute carrier family 9, subfamily A (NHE9, cation proton antiporter 9), member 9	chr3	-0.65	0.01
8146000	ADAM9	ADAM metallopeptidase domain 9	chr8	-0.65	0.01
7927964	SRGN	serglycin	chr10	-0.65	0.01
8055639	---	---	chr2	-0.65	0.01
7953428	CD4	CD4 molecule	chr12	-0.65	0.01
8142975	MIR29A	microRNA 29a	chr7	-0.65	0.01
7921625	SLAMF6	SLAM family member 6	chr1	-0.65	0.01
7904726	TXNIP	thioredoxin interacting protein	chr1	-0.66	0.000152957
7947425	CD59	CD59 molecule, complement regulatory protein	chr11	-0.66	0.00226592
8023855	CYB5A	cytochrome b5 type A (microsomal)	chr18	-0.66	0.00250542
8145922	DDHD2	DDHD domain containing 2	chr8	-0.66	0.00749395
8112139	IL6ST	interleukin 6 signal transducer (gp130, oncostatin M receptor)	chr5	-0.66	0.0084406
8120335	FAM83B	family with sequence similarity 83, member B	chr6	-0.66	0.01
8033445	CD209	CD209 molecule	chr19	-0.66	0.01
8045499	HNMT	histamine N-methyltransferase	chr2	-0.66	0.01
7952408	SIAE	sialic acid acetylesterase	chr11	-0.66	0.01
8110932	SEMA5A	sema domain, seven thrombospondin repeats (type 1 and type 1-like), transmembrane domain (TM) and short cytoplasmic domain, (semaphorin) 5A	chr5	-0.66	0.01
8045539	KYNU	kynureninase	chr2	-0.66	0.01
8039257	LAIR1	leukocyte-associated immunoglobulin-like receptor 1	chr19	-0.66	0.01
8096808	CCDC109B	coiled-coil domain containing 109B	chr4	-0.66	0.01
8125537	HLA-DMA	major histocompatibility complex, class II, DM alpha	chr6	-0.67	0.0016577
8149500	MTUS1	microtubule associated tumor suppressor 1	chr8	-0.67	0.00336588
7939341	CD44	CD44 molecule (Indian blood group)	chr11	-0.67	0.00499994
8147019	ZC2HC1A	zinc finger, C2HC-type containing 1A	chr8	-0.67	0.0066788
8084206	LOC100505668 /// B3GNT5	uncharacterized LOC100505668 /// UDP-GlcNAc:betaGal beta-1,3-N-acetylglucosaminyltransferase 5	chr3	-0.67	0.0073828
8138602	DFNA5	deafness, autosomal dominant 5	chr7	-0.67	0.01
7981994	SNORD116-23	small nucleolar RNA, C/D box 116-23	chr15	-0.68	0.00128256
7907249	FMO3	flavin containing monooxygenase 3	chr1	-0.68	0.00155903
8178884	HLA-DMA	major histocompatibility complex, class II, DM alpha	chr6	-0.68	0.00258091
8180086	HLA-DMA	major histocompatibility complex, class II, DM alpha	chr6	-0.68	0.00258091
7902074	---	---	chr1	-0.68	0.00265887
8023727	DSEL	dermatan sulfate epimerase-like	chr18	-0.68	0.00367784
8101780	HPGDS	hematopoietic prostaglandin D synthase	chr4	-0.68	0.00425918
7940259	---	---	chr11	-0.68	0.0045735
7970793	SLC46A3	solute carrier family 46, member 3	chr13	-0.68	0.01
8091523	P2RY13	purinergic receptor P2Y, G-protein coupled, 13	chr3	-0.68	0.01
8125436	HLA-DRB5	major histocompatibility complex, class II, DR beta 5	chr6	-0.68	0.01
8168438	UPRT	uracil phosphoribosyltransferase (FUR1) homolog (S. cerevisiae)	chrX	-0.69	7.36e-05
7958784	ALDH2	aldehyde dehydrogenase 2 family (mitochondrial)	chr12	-0.69	0.00257418
8152976	TMEM71	transmembrane protein 71	chr8	-0.69	0.00299465
8000184	IGSF6	immunoglobulin superfamily, member 6	chr16	-0.69	0.00323966
8092230	ZMAT3	zinc finger, matrin-type 3	chr3	-0.69	0.00561262
8144931	ATP6V1B2	ATPase, H+ transporting, lysosomal 56/58kDa, V1 subunit B2	chr8	-0.69	0.00679323
8002381	COG4	component of oligomeric golgi complex 4	chr16	-0.69	0.00779868
7989094	NEDD4	neural precursor cell expressed, developmentally down-regulated 4, E3 ubiquitin protein ligase	chr15	-0.69	0.01
7979473	DHRS7	dehydrogenase/reductase (SDR family) member 7	chr14	-0.69	0.01
7905060	FCGR1A /// FCGR1C /// FCGR1B	Fc fragment of IgG, high affinity Ia, receptor (CD64) /// Fc fragment of IgG, high affinity Ic, receptor (CD64), pseudogene /// Fc fragment of IgG, high affinity Ib, receptor (CD64)	chr1	-0.69	0.01
8173745	CYSLTR1	cysteinyl leukotriene receptor 1	chrX	-0.69	0.01
7919778	---	---	chr1	-0.69	0.01
7938035	TRIM22	tripartite motif containing 22	chr11	-0.69	0.01
7961151	KLRC4-KLRK1 /// KLRK1	KLRC4-KLRK1 readthrough /// killer cell lectin-like receptor subfamily K, member 1	chr12	-0.69	0.01
8058591	ACADL	acyl-CoA dehydrogenase, long chain	chr2	-0.7	0.000372582
8080781	PXK	PX domain containing serine/threonine kinase	chr3	-0.7	0.000456418
7926127	CELF2	CUGBP, Elav-like family member 2	chr10	-0.7	0.00076439
7906400	IFI16	interferon, gamma-inducible protein 16	chr1	-0.7	0.00106946
8130556	SOD2 /// LOC100129518	superoxide dismutase 2, mitochondrial /// uncharacterized LOC100129518	chr6	-0.7	0.0013159
8134098	CDK14	cyclin-dependent kinase 14	chr7	-0.7	0.00181113
7910706	LGALS8	lectin, galactoside-binding, soluble, 8	chr1	-0.7	0.00239844
7988921	MYO5A	myosin VA (heavy chain 12, myoxin)	chr15	-0.7	0.00312909
8033257	C3	complement component 3	chr19	-0.7	0.00519789
8171921	DMD	dystrophin	chrX	-0.7	0.00811726
8094520	PCDH7	protocadherin 7	chr4	-0.7	0.00821741
8149413	DLC1	deleted in liver cancer 1	chr8	-0.7	0.01
7921916	RGS5	regulator of G-protein signaling 5	chr1	-0.7	0.01
8121181	FHL5	four and a half LIM domains 5	chr6	-0.7	0.01
8083166	TRPC1	transient receptor potential cation channel, subfamily C, member 1	chr3	-0.7	0.01
7927215	ALOX5	arachidonate 5-lipoxygenase	chr10	-0.7	0.01
8144742	EFHA2	EF-hand domain family, member A2	chr8	-0.71	0.000200543
8107673	GRAMD3	GRAM domain containing 3	chr5	-0.71	0.00127169
8098379	WDR17	WD repeat domain 17	chr4	-0.71	0.00146386
7965322	KITLG	KIT ligand	chr12	-0.71	0.00221035
7983512	SQRDL	sulfide quinone reductase-like (yeast)	chr15	-0.71	0.00267593
8166632	---	---	chrX	-0.71	0.00309211
8081537	TRAT1	T cell receptor associated transmembrane adaptor 1	chr3	-0.71	0.00547473
7903893	CD53	CD53 molecule	chr1	-0.71	0.01
7985493	TM6SF1	transmembrane 6 superfamily member 1	chr15	-0.71	0.01
8057394	SESTD1	SEC14 and spectrin domains 1	chr2	-0.72	0.00291378
7996934	NIP7	nuclear import 7 homolog (S. cerevisiae)	chr16	-0.72	0.00307593
8145470	DPYSL2	dihydropyrimidinase-like 2	chr8	-0.72	0.00319702
8127498	MIR30C2	microRNA 30c-2	chr6	-0.72	0.00324709
7932985	NRP1	neuropilin 1	chr10	-0.72	0.00843338
8089011	PROS1	protein S (alpha)	chr3	-0.72	0.01
8126784	PLA2G7	phospholipase A2, group VII (platelet-activating factor acetylhydrolase, plasma)	chr6	-0.72	0.01
7955348	GPD1	glycerol-3-phosphate dehydrogenase 1 (soluble)	chr12	-0.72	0.01
8096116	AGPAT9	1-acylglycerol-3-phosphate O-acyltransferase 9	chr4	-0.73	0.00114716
7981960	SNORD116-6	small nucleolar RNA, C/D box 116-6	chr15	-0.73	0.00148843
8161839	NMRK1	nicotinamide riboside kinase 1	chr9	-0.73	0.00241842
7972557	GPR183	G protein-coupled receptor 183	chr13	-0.73	0.00386945
8166730	CYBB	cytochrome b-245, beta polypeptide	chrX	-0.73	0.01
8139832	ZNF117	zinc finger protein 117	chr7	-0.73	0.01
7902441	ST6GALNAC5	ST6 (alpha-N-acetyl-neuraminyl-2,3-beta-galactosyl-1,3)-N-acetylgalactosaminide alpha-2,6-sialyltransferase 5	chr1	-0.73	0.01
8055980	CYTIP	cytohesin 1 interacting protein	chr2	-0.73	0.01
8029536	APOC1	apolipoprotein C-I	chr19	-0.73	0.01
8091411	TM4SF1	transmembrane 4 L six family member 1	chr3	-0.73	0.01
8168557	SH3BGRL	SH3 domain binding glutamic acid-rich protein like	chrX	-0.74	0.000639518
8163896	STOM	stomatin	chr9	-0.74	0.00453325
8070826	ITGB2	integrin, beta 2 (complement component 3 receptor 3 and 4 subunit)	chr21	-0.74	0.00884965
8098441	ODZ3	odz, odd Oz/ten-m homolog 3 (Drosophila)	chr4	-0.74	0.01
7972601	NALCN	sodium leak channel, non-selective	chr13	-0.74	0.01
7955908	NCKAP1L	NCK-associated protein 1-like	chr12	-0.74	0.01
7909214	RASSF5	Ras association (RalGDS/AF-6) domain family member 5	chr1	-0.75	0.000414758
8145291	SLC25A37	solute carrier family 25 (mitochondrial iron transporter), member 37	chr8	-0.75	0.000663719
7930498	ACSL5	acyl-CoA synthetase long-chain family member 5	chr10	-0.75	0.000848185
7981945	LOC100506965	uncharacterized LOC100506965	chr15	-0.75	0.00119516
8111892	OXCT1	3-oxoacid CoA transferase 1	chr5	-0.75	0.00169276
8095697	CXCL1	chemokine (C-X-C motif) ligand 1 (melanoma growth stimulating activity, alpha)	chr4	-0.75	0.00318615
7954436	LRMP	lymphoid-restricted membrane protein	chr12	-0.75	0.0042673
7981958	SNORD116-5 /// SNORD116-7	small nucleolar RNA, C/D box 116-5 /// small nucleolar RNA, C/D box 116-7	chr15	-0.75	0.00456437
7981962	SNORD116-5 /// SNORD116-7	small nucleolar RNA, C/D box 116-5 /// small nucleolar RNA, C/D box 116-7	chr15	-0.75	0.00456437
8102415	CAMK2D	calcium/calmodulin-dependent protein kinase II delta	chr4	-0.75	0.00605098
8136662	MGAM	maltase-glucoamylase (alpha-glucosidase)	chr7	-0.75	0.0061921
8106141	FCHO2	FCH domain only 2	chr5	-0.75	0.00764522
8097335	HSPA4L	heat shock 70kDa protein 4-like	chr4	-0.75	0.00818113
7954810	LRRK2	leucine-rich repeat kinase 2	chr12	-0.75	0.00942129
7981068	SERPINA1	serpin peptidase inhibitor, clade A (alpha-1 antiproteinase, antitrypsin), member 1	chr14	-0.75	0.01
8145685	---	---	chr8	-0.75	0.01
8080938	MITF	microphthalmia-associated transcription factor	chr3	-0.76	0.000171453
8145669	RBPMS	RNA binding protein with multiple splicing	chr8	-0.76	0.00189463
8149733	TNFRSF10B	tumor necrosis factor receptor superfamily, member 10b	chr8	-0.76	0.00262471
7981953	SNORD116-3 /// SNORD116-9	small nucleolar RNA, C/D box 116-3 /// small nucleolar RNA, C/D box 116-9	chr15	-0.76	0.00324388
7981966	SNORD116-3 /// SNORD116-9	small nucleolar RNA, C/D box 116-3 /// small nucleolar RNA, C/D box 116-9	chr15	-0.76	0.00324388
8127234	LOC100652766 /// DST	dystonin-like /// dystonin	chr6	-0.76	0.01
7942569	SLCO2B1	solute carrier organic anion transporter family, member 2B1	chr11	-0.76	0.01
7959102	HSPB8	heat shock 22kDa protein 8	chr12	-0.77	0.000248017
8145365	DOCK5	dedicator of cytokinesis 5	chr8	-0.77	0.000626344
7908003	NPL	N-acetylneuraminate pyruvate lyase (dihydrodipicolinate synthase)	chr1	-0.77	0.00629947
8080926	ARL6IP5	ADP-ribosylation-like factor 6 interacting protein 5	chr3	-0.77	0.00808806
8125461	HLA-DQB1	major histocompatibility complex, class II, DQ beta 1	chr6	-0.77	0.0089191
7909441	G0S2	G0/G1switch 2	chr1	-0.77	0.01
8161755	ALDH1A1	aldehyde dehydrogenase 1 family, member A1	chr9	-0.77	0.01
8123598	SERPINB1	serpin peptidase inhibitor, clade B (ovalbumin), member 1	chr6	-0.78	0.000304389
7981964	SNORD116-8	small nucleolar RNA, C/D box 116-8	chr15	-0.78	0.00194862
7989493	RPS27L	ribosomal protein S27-like	chr15	-0.78	0.00572891
8096415	MMRN1	multimerin 1	chr4	-0.78	0.00680738
8014233	SLFN11	schlafen family member 11	chr17	-0.78	0.01
7993807	TMEM159	transmembrane protein 159	chr16	-0.79	0.000126704
8137485	DPP6	dipeptidyl-peptidase 6	chr7	-0.79	0.00353542
8138805	---	---	chr7	-0.79	0.00374051
8089015	PROS1	protein S (alpha)	chr3	-0.79	0.00492685
7934920	LOC100507575 /// LIPA	uncharacterized LOC100507575 /// lipase A, lysosomal acid, cholesterol esterase	chr10	-0.79	0.00741033
8113130	MCTP1	multiple C2 domains, transmembrane 1	chr5	-0.79	0.00829234
8135587	CAV2	caveolin 2	chr7	-0.79	0.0097783
8151756	TMEM55A	transmembrane protein 55A	chr8	-0.8	0.000501681
7903227	PALMD	palmdelphin	chr1	-0.8	0.00198095
7916986	NEGR1	neuronal growth regulator 1	chr1	-0.8	0.0024505
8104607	---	---	chr5	-0.8	0.00245392
7960794	CD163	CD163 molecule	chr12	-0.8	0.00994938
8048432	CYP27A1	cytochrome P450, family 27, subfamily A, polypeptide 1	chr2	-0.8	0.01
8099834	TLR1	toll-like receptor 1	chr4	-0.8	0.01
7922846	FAM129A	family with sequence similarity 129, member A	chr1	-0.81	0.000390724
8095110	KIT	v-kit Hardy-Zuckerman 4 feline sarcoma viral oncogene homolog	chr4	-0.81	0.00303008
7917912	DPYD	dihydropyrimidine dehydrogenase	chr1	-0.81	0.00312008
8089145	ABI3BP	ABI family, member 3 (NESH) binding protein	chr3	-0.81	0.00797672
7942372	FOLR2	folate receptor 2 (fetal)	chr11	-0.81	0.01
7952022	AMICA1	adhesion molecule, interacts with CXADR antigen 1	chr11	-0.81	0.01
8180266	---	---	---	-0.81	0.01
7989023	RAB27A	RAB27A, member RAS oncogene family	chr15	-0.82	0.000541785
7948455	MS4A6A	membrane-spanning 4-domains, subfamily A, member 6A	chr11	-0.82	0.00558961
8014063	EVI2B	ecotropic viral integration site 2B	chr17	-0.82	0.00858679
8146934	LY96	lymphocyte antigen 96	chr8	-0.83	0.01
8151447	IL7	interleukin 7	chr8	-0.84	1.96e-05
8046906	GULP1	GULP, engulfment adaptor PTB domain containing 1	chr2	-0.84	0.000250521
7973101	RNASE6	ribonuclease, RNase A family, k6	chr14	-0.84	0.00124781
7906757	FCGR2A	Fc fragment of IgG, low affinity IIa, receptor (CD32)	chr1	-0.84	0.00211568
8045563	ARHGAP15	Rho GTPase activating protein 15	chr2	-0.84	0.0026975
8157524	TLR4	toll-like receptor 4	chr9	-0.84	0.0074133
7961532	ARHGDIB	Rho GDP dissociation inhibitor (GDI) beta	chr12	-0.84	0.01
8104035	SORBS2	sorbin and SH3 domain containing 2	chr4	-0.85	0.000148082
8172425	SLC38A5	solute carrier family 38, member 5	chrX	-0.85	0.00679797
8174119	ZMAT1	zinc finger, matrin-type 1	chrX	-0.85	0.0089362
8125447	---	---	chr6	-0.85	0.01
8104930	SLC1A3	solute carrier family 1 (glial high affinity glutamate transporter), member 3	chr5	-0.86	0.00032028
7909967	CAPN2	calpain 2, (m/II) large subunit	chr1	-0.86	0.000731077
8131844	GPNMB	glycoprotein (transmembrane) nmb	chr7	-0.86	0.0033954
8096176	PTPN13	protein tyrosine phosphatase, non-receptor type 13 (APO-1/CD95 (Fas)-associated phosphatase)	chr4	-0.86	0.00711148
8056222	DPP4	dipeptidyl-peptidase 4	chr2	-0.86	0.01
7971461	LCP1	lymphocyte cytosolic protein 1 (L-plastin)	chr13	-0.86	0.01
7943715	ZC3H12C	zinc finger CCCH-type containing 12C	chr11	-0.87	7.53e-06
7981919	SNRPN /// SNURF /// PAR-SN /// SNORD107	small nuclear ribonucleoprotein polypeptide N /// SNRPN upstream reading frame /// paternally expressed transcript PAR-SN /// small nucleolar RNA, C/D box 107	chr15	-0.87	3.67e-05
7981992	LOC100506948 /// SNORD116-28 /// SNORD115-26 /// SNORD115-13 /// SNORD115-7 /// SNORD107 /// SNORD116-22	uncharacterized LOC100506948 /// small nucleolar RNA, C/D box 116-28 /// small nucleolar RNA, C/D box 115-26 /// small nucleolar RNA, C/D box 115-13 /// small nucleolar RNA, C/D box 115-7 /// small nucleolar RNA, C/D box 107 /// small nucleolar RNA, C/D box 116-22	chr15	-0.87	0.00086395
8096733	SGMS2	sphingomyelin synthase 2	chr4	-0.87	0.00114831
8021946	COLEC12	collectin sub-family member 12	chr18	-0.87	0.00523909
7960874	C3AR1	complement component 3a receptor 1	chr12	-0.87	0.00779722
7922773	NCF2	neutrophil cytosolic factor 2	chr1	-0.87	0.01
7976080	GPR65	G protein-coupled receptor 65	chr14	-0.87	0.01
8138553	FAM126A	family with sequence similarity 126, member A	chr7	-0.88	0.00337625
8009243	MILR1	mast cell immunoglobulin-like receptor 1	chr17	-0.88	0.00500486
7909371	CR1	complement component (3b/4b) receptor 1 (Knops blood group)	chr1	-0.88	0.00594691
7958019	DRAM1	DNA-damage regulated autophagy modulator 1	chr12	-0.88	0.01
8101957	EMCN	endomucin	chr4	-0.88	0.01
7909503	SERTAD4	SERTA domain containing 4	chr1	-0.89	0.00058102
8163839	C5	complement component 5	chr9	-0.89	0.000881272
8091306	PLSCR4	phospholipid scramblase 4	chr3	-0.89	0.00098924
7981949	SNORD116-1	small nucleolar RNA, C/D box 116-1	chr15	-0.89	0.00129653
7929032	FAS	Fas (TNF receptor superfamily, member 6)	chr10	-0.89	0.00299821
8078155	GALNTL2	UDP-N-acetyl-alpha-D-galactosamine:polypeptide N-acetylgalactosaminyltransferase-like 2	chr3	-0.89	0.00855135
7917182	ELTD1	EGF, latrophilin and seven transmembrane domain containing 1	chr1	-0.89	0.01
7943413	BIRC3	baculoviral IAP repeat containing 3	chr11	-0.9	0.000841502
8057599	TFPI	tissue factor pathway inhibitor (lipoprotein-associated coagulation inhibitor)	chr2	-0.9	0.01
8149448	MSR1	macrophage scavenger receptor 1	chr8	-0.9	0.01
8057677	SLC40A1	solute carrier family 40 (iron-regulated transporter), member 1	chr2	-0.9	0.01
8022612	ZNF521	zinc finger protein 521	chr18	-0.91	0.000450474
7935228	---	---	chr10	-0.91	0.00215234
7908553	PTPRC	protein tyrosine phosphatase, receptor type, C	chr1	-0.91	0.00647316
7981990	SNORD116-21 /// SNORD116@	small nucleolar RNA, C/D box 116-21 /// small nucleolar RNA, C/D box 116 cluster	chr15	-0.91	0.01
8022118	EPB41L3	erythrocyte membrane protein band 4.1-like 3	chr18	-0.92	0.00124712
8095021	SPATA18	spermatogenesis associated 18	chr4	-0.92	0.00140451
7981978	SNORD116-15	small nucleolar RNA, C/D box 116-15	chr15	-0.93	0.000663914
8127502	LINC00472	long intergenic non-protein coding RNA 472	chr6	-0.93	0.00122774
8114900	PPP2R2B	protein phosphatase 2, regulatory subunit B, beta	chr5	-0.93	0.00192122
8162388	OMD	osteomodulin	chr9	-0.93	0.00386396
8077899	PPARG	peroxisome proliferator-activated receptor gamma	chr3	-0.93	0.00701662
8108733	PCDHB12	protocadherin beta 12	chr5	-0.93	0.00739941
7938629	PDE3B	phosphodiesterase 3B, cGMP-inhibited	chr11	-0.93	0.00753815
8111772	DAB2	disabled homolog 2, mitogen-responsive phosphoprotein (Drosophila)	chr5	-0.93	0.01
7981984	SNORD116-18	small nucleolar RNA, C/D box 116-18	chr15	-0.94	0.00122587
8092726	CLDN1	claudin 1	chr3	-0.94	0.01
8145954	TACC1	transforming, acidic coiled-coil containing protein 1	chr8	-0.95	0.00012869
8180366	---	---	---	-0.95	0.000764292
8180367	---	---	---	-0.95	0.000764292
8068024	JAM2	junctional adhesion molecule 2	chr21	-0.95	0.00166658
8017619	---	---	---	-0.95	0.00269254
8145293	ADAM28	ADAM metallopeptidase domain 28	chr8	-0.95	0.00454695
8016094	GJC1	gap junction protein, gamma 1, 45kDa	chr17	-0.95	0.01
7944803	VWA5A	von Willebrand factor A domain containing 5A	chr11	-0.96	1.17e-05
7935188	SORBS1	sorbin and SH3 domain containing 1	chr10	-0.96	0.00335861
8137483	FLJ16734	uncharacterized LOC641928	chr7	-0.96	0.00739014
7956658	SLC16A7	solute carrier family 16, member 7 (monocarboxylic acid transporter 2)	chr12	-0.97	0.00106859
8169389	PAK3	p21 protein (Cdc42/Rac)-activated kinase 3	chrX	-0.97	0.00257926
7927681	BICC1	bicaudal C homolog 1 (Drosophila)	chr10	-0.97	0.00748783
8112107	PPAP2A	phosphatidic acid phosphatase type 2A	chr5	-0.97	0.01
8176234	CLIC2	chloride intracellular channel 2	chrX	-0.99	0.00064728
8105121	GHR	growth hormone receptor	chr5	-0.99	0.00257978
8047300	AOX1	aldehyde oxidase 1	chr2	-0.99	0.00351236
7986350	ARRDC4	arrestin domain containing 4	chr15	-0.99	0.00402293
8173287	VSIG4	V-set and immunoglobulin domain containing 4	chrX	-0.99	0.00657287
7946328	---	---	chr11	-0.99	0.01
8104079	FAT1	FAT tumor suppressor homolog 1 (Drosophila)	chr4	-1	0.000240937
8078330	RBMS3	RNA binding motif, single stranded interacting protein 3	chr3	-1	0.00202255
7960947	A2M	alpha-2-macroglobulin	chr12	-1	0.00379071
8163002	KLF4	Kruppel-like factor 4 (gut)	chr9	-1.01	0.00589736
7954196	MGST1	microsomal glutathione S-transferase 1	chr12	-1.03	0.000154508
7919800	CTSS	cathepsin S	chr1	-1.03	0.000257173
8175393	ARHGEF6	Rac/Cdc42 guanine nucleotide exchange factor (GEF) 6	chrX	-1.03	0.00120274
8105331	GZMK	granzyme K (granzyme 3; tryptase II)	chr5	-1.03	0.00891593
7981988	SNORD116-20 /// SNORD116@	small nucleolar RNA, C/D box 116-20 /// small nucleolar RNA, C/D box 116 cluster	chr15	-1.04	0.000299461
8129573	MOXD1	monooxygenase, DBH-like 1	chr6	-1.05	0.00913341
7906377	MNDA	myeloid cell nuclear differentiation antigen	chr1	-1.06	0.00729308
8155849	ANXA1	annexin A1	chr9	-1.07	0.000171202
7981996	SNORD116-24	small nucleolar RNA, C/D box 116-24	chr15	-1.08	0.000205243
8135594	CAV1	caveolin 1, caveolae protein, 22kDa	chr7	-1.09	0.00062457
7946321	---	---	chr11	-1.09	0.00957628
8064904	FERMT1	fermitin family member 1	chr20	-1.1	1.77e-05
8102950	INPP4B	inositol polyphosphate-4-phosphatase, type II, 105kDa	chr4	-1.1	0.000280703
8083260	CPA3	carboxypeptidase A3 (mast cell)	chr3	-1.1	0.000413286
8091715	LXN	latexin	chr3	-1.1	0.00188518
8166906	GPR34	G protein-coupled receptor 34	chrX	-1.11	0.000213792
7981982	SNORD116-17 /// SNORD116-19 /// SNORD116@ /// SNRPN	small nucleolar RNA, C/D box 116-17 /// small nucleolar RNA, C/D box 116-19 /// small nucleolar RNA, C/D box 116 cluster /// small nuclear ribonucleoprotein polypeptide N	chr15	-1.11	0.000494252
7981986	SNORD116-17 /// SNORD116-19 /// SNORD116@ /// SNRPN	small nucleolar RNA, C/D box 116-17 /// small nucleolar RNA, C/D box 116-19 /// small nucleolar RNA, C/D box 116 cluster /// small nuclear ribonucleoprotein polypeptide N	chr15	-1.11	0.000494252
8151816	GEM	GTP binding protein overexpressed in skeletal muscle	chr8	-1.11	0.00549098
8003814	ASPA	aspartoacylase	chr17	-1.12	0.000421631
7961710	ABCC9	ATP-binding cassette, sub-family C (CFTR/MRP), member 9	chr12	-1.12	0.01
8161288	CNTNAP3B /// CNTNAP3	contactin associated protein-like 3B /// contactin associated protein-like 3	chr9	-1.13	4.21e-06
7936494	GFRA1	GDNF family receptor alpha 1	chr10	-1.15	0.00883185
8112731	F2RL2	coagulation factor II (thrombin) receptor-like 2	chr5	-1.16	0.0015287
8138466	MACC1	metastasis associated in colon cancer 1	chr7	-1.16	0.00597438
8112007	EMB	embigin	chr5	-1.17	9.42e-06
7923043	KCNT2	potassium channel, subfamily T, member 2	chr1	-1.17	0.00493321
7991313	PLIN1	perilipin 1	chr15	-1.18	0.01
8155460	CNTNAP3B /// CNTNAP3	contactin associated protein-like 3B /// contactin associated protein-like 3	chr9	-1.19	2.47e-06
7951662	CRYAB	crystallin, alpha B	chr11	-1.19	0.000550216
7981976	SNORD116-14	small nucleolar RNA, C/D box 116-14	chr15	-1.21	0.000142447
8084757	LOC100505861 /// TPRG1	uncharacterized LOC100505861 /// tumor protein p63 regulated 1	chr3	-1.21	0.00546145
8091867	BCHE	butyrylcholinesterase	chr3	-1.24	2.74e-05
8180303	---	---	---	-1.25	0.00686277
7926410	MRC1	mannose receptor, C type 1	chr10	-1.26	0.00232603
7926451	MRC1	mannose receptor, C type 1	chr10	-1.26	0.00232603
8109194	SLC26A2	solute carrier family 26 (sulfate transporter), member 2	chr5	-1.27	0.00508341
8102792	PCDH18	protocadherin 18	chr4	-1.27	0.00536424
7971565	LPAR6	lysophosphatidic acid receptor 6	chr13	-1.3	6.97e-05
7940237	MS4A4A	membrane-spanning 4-domains, subfamily A, member 4A	chr11	-1.3	0.00344657
8122365	GPR126	G protein-coupled receptor 126	chr6	-1.32	0.000499714
8174513	CHRDL1	chordin-like 1	chrX	-1.32	0.00111014
8135601	MET	met proto-oncogene (hepatocyte growth factor receptor)	chr7	-1.32	0.00168316
8126853	PTCHD4	patched domain containing 4	chr6	-1.32	0.00425399
7983910	AQP9	aquaporin 9	chr15	-1.34	0.000607529
7957023	LYZ	lysozyme	chr12	-1.34	0.00681269
7907271	FMO2	flavin containing monooxygenase 2 (non-functional)	chr1	-1.35	0.00896585
8052355	EFEMP1	EGF containing fibulin-like extracellular matrix protein 1	chr2	-1.36	0.0010695
8154295	IL33	interleukin 33	chr9	-1.36	0.00181079
8120967	NT5E	5'-nucleotidase, ecto (CD73)	chr6	-1.36	0.00935565
8152522	ENPP2	ectonucleotide pyrophosphatase/phosphodiesterase 2	chr8	-1.39	3.55e-07
7951437	GUCY1A2	guanylate cyclase 1, soluble, alpha 2	chr11	-1.39	0.000700699
7965873	IGF1	insulin-like growth factor 1 (somatomedin C)	chr12	-1.39	0.00298872
8103769	HPGD	hydroxyprostaglandin dehydrogenase 15-(NAD)	chr4	-1.41	0.000469084
8122334	CCRL1	chemokine (C-C motif) receptor-like 1	chr6	-1.43	0.01
8162373	OGN	osteoglycin	chr9	-1.45	0.01
8103951	ACSL1	acyl-CoA synthetase long-chain family member 1	chr4	-1.48	0.00143861
8141094	PDK4	pyruvate dehydrogenase kinase, isozyme 4	chr7	-1.48	0.0031932
8059538	SLC19A3	solute carrier family 19, member 3	chr2	-1.51	2.49e-05
7938758	SAA1	serum amyloid A1	chr11	-1.51	0.00820636
7951686	IL18	interleukin 18 (interferon-gamma-inducing factor)	chr11	-1.52	0.00037899
8140840	STEAP4	STEAP family member 4	chr7	-1.52	0.0024728
7961514	MGP	matrix Gla protein	chr12	-1.54	0.00424761
8123744	F13A1	coagulation factor XIII, A1 polypeptide	chr6	-1.58	0.01
8108693	---	---	chr5	-1.59	5.23e-05
8155359	CNTNAP3B /// CNTNAP3	contactin associated protein-like 3B /// contactin associated protein-like 3	chr9	-1.62	1.75e-08
8108688	PCDHB3	protocadherin beta 3	chr5	-1.64	0.000171661
7923562	CHIT1	chitinase 1 (chitotriosidase)	chr1	-1.71	0.01
8112202	PLK2	polo-like kinase 2	chr5	-1.73	0.00484952
8155540	CNTNAP3B /// CNTNAP3	contactin associated protein-like 3B /// contactin associated protein-like 3	chr9	-1.76	3.4e-09
8161460	CNTNAP3B /// CNTNAP3	contactin associated protein-like 3B /// contactin associated protein-like 3	chr9	-1.76	3.4e-09
8084710	ADIPOQ	adiponectin, C1Q and collagen domain containing	chr3	-1.76	0.01
7989750	CILP	cartilage intermediate layer protein, nucleotide pyrophosphohydrolase	chr15	-1.79	0.00463609
7946306	OVCH2	ovochymase 2 (gene/pseudogene)	chr11	-1.79	0.00732549
7925531	AKT3	v-akt murine thymoma viral oncogene homolog 3 (protein kinase B, gamma)	chr1	-1.81	5.25e-05
7946323	OR5P2	olfactory receptor, family 5, subfamily P, member 2	chr11	-1.92	0.01
8006594	CCL18	chemokine (C-C motif) ligand 18 (pulmonary and activation-regulated)	chr17	-2.03	0.00192302
8162394	ASPN	asporin	chr9	-2.05	0.00400267
8144917	LPL	lipoprotein lipase	chr8	-2.16	1.38e-05
7934979	ANKRD1	ankyrin repeat domain 1 (cardiac muscle)	chr10	-2.42	0.01
