# Supplementary material for: Global DNA Hypomethylation in Epithelial Ovarian Cancer: Passive Demethylation and Association with Genomic Instability
Source: Cancers (Basel). 2020 Mar 24;12(3):764. doi: 10.3390/cancers12030764 (PMC7140107; doi:10.3390/cancers12030764)
Supplement: Supplementary file 1 [file cancers-12-00764-s001.zip › Wa_ Supplementary Table 3 IPA Pathways summary.xlsx]

## Sheet: Pathway analysis (IPA)
Zhang et al. Supplementary Table 3. Differentially expressed pathway of all DEGs (Ingenuity Pathway Analysis)
Top Networks
Associated Network Functions		Score
DNA Replication, Recombination, and Repair, Cell Cycle, Cellular Assembly and Organization		41
Cell Cycle, Cellular Movement, Cellular Assembly and Organization		39
Cellular Compromise, Cellular Assembly and Organization, Cellular Function and Maintenance		38
Post-Translational Modification, Endocrine System Development and Function, Lipid Metabolism		38
Carbohydrate Metabolism, Cellular Development, Cellular Growth and Proliferation		36
Top Biological Functions
Diseases and Disorders
Name	p-value	# Molecules
Cancer	8.98E-36 - 1.49E-03	785
Reproductive System Disease	3.43E-25 - 1.49E-03	290
Respiratory Disease	8.82E-18 - 8.74E-09	128
Gastrointestinal Disease	7.31E-16 - 9.61E-04	437
Endocrine System Disorders	2.43E-11 - 1.11E-03	115
Molecular and Cellular Functions
Name	p-value	# Molecules
Cell Cycle	3.74E-22 - 1.41E-03	244
Cellular Assembly and Organization	3.74E-22 - 1.42E-03	227
DNA Replication, Recombination, and Repair	3.74E-22 - 1.49E-03	190
Cell Death and Survival	3.10E-13 - 1.54E-03	408
Cellular Growth and Proliferation	7.51E-12 - 1.41E-03	397
Physiological System Development and Function
Name	p-value	# Molecules
Organismal Survival	4.52E-10 - 1.12E-06	295
Tissue Development	1.88E-07 - 1.34E-03	265
Organismal Development	1.68E-06 - 1.34E-03	226
Embryonic Development	1.87E-06 - 1.34E-03	202
Organ Development	1.87E-06 - 1.34E-03	162
Top Canonical Pathways
Name	p-value	Ratio
Cell Cycle: G2/M DNA Damage Checkpoint Regulation	4.12e-07	14/49 (0.286)
Role of BRCA1 in DNA Damage Response	4.83e-06	15/71 (0.211)
Molecular Mechanisms of Cancer	1.08e-05	44/387 (0.114)
Mitotic Roles of Polo-Like Kinase	2.04e-05	15/74 (0.203)
Hereditary Breast Cancer Signaling	5.57e-05	20/134 (0.149)
Top Molecules
Log Ratio up-regulated
Molecules		Exp. Value
CTCFL		3.11
SYCP2		2.42
GAGE1 (includes others)*		2.14
SEMA3E		2.13
MAGEC2		2.11
TKTL1		1.95
PTH2R		1.93
POTEE/POTEF*		1.72
SST		1.69
POTEM (includes others)*		1.62
Log Ratio down-regulated
Molecules		Exp. Value
CRISP3		-3.03
RXFP1		-2.43
GDA		-2.04
SYT14		-2.01
ABCA8		-2.01
MYH11		-1.96
AGR3		-1.89
LYVE1		-1.87
APOD		-1.86
PTGS2		-1.81
Top Upstream Regulators
Upstream Regulator	p-value of overlap	Predicted Activation State
CDKN1A	5.86e-26	Inhibited
E2F4	4.93e-25
dextran sulfate	1.14e-23
TP53	1.22e-21	Inhibited
HGF	7.25e-21
Top Tox Lists
Name	p-value	Ratio
Cell Cycle: G2/M DNA Damage Checkpoint Regulation	1.35e-06	14/48 (0.292)
Liver Proliferation	0.000437	27/207 (0.13)
Renal Necrosis/Cell Death	0.0011	48/466 (0.103)
p53 Signaling	0.00118	15/95 (0.158)
Increases Liver Hyperplasia/Hyperproliferation	0.00261	11/64 (0.172)
