# Supplementary material for: Global DNA Hypomethylation in Epithelial Ovarian Cancer: Passive Demethylation and Association with Genomic Instability
Source: Cancers (Basel). 2020 Mar 24;12(3):764. doi: 10.3390/cancers12030764 (PMC7140107; doi:10.3390/cancers12030764)
Supplement: Supplementary file 1 [file cancers-12-00764-s001.zip › Wa_ Supplementary Table 4 CG DEG Summary.xlsx]

## Sheet: CG-DEGs
Zhang et al. Supplementary Table 4. Differentially expressed CG antigen genes.
Probe Set ID	Targeted genes	Gene Title	chr	strand	GDHO(+) vs. GDHO (-)						EOC vs. NO			DAC treatement
					All 40 samples			disease matched			All 40 samples			IOSE121			OVCAR3
					log2(FC)	pVal	FDR	log2(FC)	pVal	FDR	log2(FC)	pVal	FDR	log2(FC)	pVal	FDR	log2(FC)	pVal	FDR
8170531	MAGEA4	melanoma antigen family A, 4	chrX	+	1.09	0.000557	0.06	1.35	0.01	0.4	0.83	0.13	0.39	3.09	3.95e-13	1.1e-09	1.49	4.39e-06	0.00129
8175629	MAGEA11	melanoma antigen family A, 11	chrX	+	0.39	0.00299	0.14	0.35	0.08	0.75	0.34	0.2	0.49	0.36	0.11	0.87	0.12	0.53	0.99
8167526	GAGE1	G antigen 1	chrX	+	1.79	0.00327	0.15	1.73	0.01	0.44	-0.06	0.25	0.54	0.79	0.00149	0.08	3.93	5.55e-15	9.24e-11
	GAGE2C	G antigen 2C
	GAGE12D	G antigen 12D
	GAGE12H	G antigen 12H
	GAGE12E	G antigen 12E
	GAGE12C	G antigen 12C
	GAGE2D	G antigen 2D
	GAGE12J	G antigen 12J
	GAGE12G	G antigen 12G
	GAGE2A	G antigen 2A
	GAGE8	G antigen 8
8167482	GAGE2E	G antigen 2E	chrX	+	2.14	0.00185	0.11	1.94	0.01	0.46	-0.09	0.21	0.5	1.01	0.000146	0.01	4.35	6.79e-14	3.23e-10
	GAGE2D	G antigen 2D
	GAGE5	G antigen 5
	GAGE2C	G antigen 2C
	GAGE4	G antigen 4
	GAGE12D	G antigen 12D
	GAGE12E	G antigen 12E
	GAGE12B	G antigen 12B
	GAGE12C	G antigen 12C
	GAGE12F	G antigen 12F
	GAGE12G	G antigen 12G
	GAGE12I	G antigen 12I
	GAGE7	G antigen 7
	GAGE6	G antigen 6
	GAGE12H	G antigen 12H
	GAGE2A	G antigen 2A
8167577	GAGE5	G antigen 5	chrX	+	2.09	0.00268	0.13	1.91	0.01	0.45	-0.05	0.23	0.52	0.91	0.000166	0.01	4.37	3.16e-14	2.11e-10
	GAGE7	G antigen 7
	GAGE12I	G antigen 12I
	GAGE12G	G antigen 12G
	GAGE12F	G antigen 12F
	GAGE4	G antigen 4
	GAGE6	G antigen 6
	GAGE12D	G antigen 12D
	GAGE12E	G antigen 12E
	GAGE12B	G antigen 12B
	GAGE12C	G antigen 12C
	GAGE12H	G antigen 12H
	GAGE12J	G antigen 12J
8167584	GAGE5	G antigen 5	chrX	+	2.09	0.00268	0.13	1.91	0.01	0.45	-0.05	0.23	0.52	0.91	0.000166	0.01	4.37	3.16e-14	2.11e-10
	GAGE7	G antigen 7
	GAGE12I	G antigen 12I
	GAGE12G	G antigen 12G
	GAGE12F	G antigen 12F
	GAGE4	G antigen 4
	GAGE6	G antigen 6
	GAGE12D	G antigen 12D
	GAGE12E	G antigen 12E
	GAGE12B	G antigen 12B
	GAGE12C	G antigen 12C
	GAGE12H	G antigen 12H
	GAGE12J	G antigen 12J
8167508	GAGE5	G antigen 5	chrX	+	1.99	0.00251	0.13	1.85	0.01	0.47	-0.06	0.23	0.51	0.92	0.000292	0.02	4.2	2.82e-14	2.11e-10
	GAGE7	G antigen 7
	GAGE12I	G antigen 12I
	GAGE12G	G antigen 12G
	GAGE12F	G antigen 12F
	GAGE4	G antigen 4
	GAGE6	G antigen 6
	GAGE12D	G antigen 12D
	GAGE12E	G antigen 12E
	GAGE12B	G antigen 12B
	GAGE12C	G antigen 12C
	GAGE12H	G antigen 12H
	GAGE12J	G antigen 12J
	GAGE2D	G antigen 2D
8167728	SSX2	synovial sarcoma, X breakpoint 2	chrX	+	0.52	0.00964	0.26	0.72	0.01	0.43	-0.28	0.18	0.46	3.99	8.54e-12	1.42e-08	3.6	1.76e-09	1.19e-06
	SSX2B	synovial sarcoma, X breakpoint 2B
8172787	SSX2	synovial sarcoma, X breakpoint 2	chrX	-	0.59	0.00547	0.19	0.82	0.00495	0.32	-0.21	0.29	0.58	4.19	1.72e-12	3.38e-09	3.92	1.34e-10	1.35e-07
	SSX2B	synovial sarcoma, X breakpoint 2B
8167261	SSX4	synovial sarcoma, X breakpoint 4	chrX	+	1.54	0.000653	0.07	1.7	0.00247	0.24	0.63	0.86	0.94	1.98	2.5e-07	7.07e-05	2.89	1.6e-10	1.48e-07
	SSX4B	synovial sarcoma, X breakpoint 4B
8172415	SSX9	synovial sarcoma, X breakpoint 9	chrX	-	1.5	0.000724	0.07	1.66	0.00286	0.25	0.58	0.91	0.97	1.92	1.3e-07	4.08e-05	2.85	8.08e-09	4.41e-06
8175562	MAGEC2	melanoma antigen family C, 2	chrX	-	2.11	0.00259	0.13	1.39	0.06	0.7	1.36	0.55	0.79	2.08	2.54e-06	0.00048	1	0.00148	0.16
8170076	SAGE1	sarcoma antigen 1	chrX	+	1.08	0.00304	0.14	1.11	0.03	0.55	0.72	0.38	0.66	-0.01	0.76	0.98	1.33	3.5e-05	0.00808
8167866	PAGE2	P antigen family, member 2 (prostate associated)	chrX	+	0.66	0.00296	0.14	0.48	0.05	0.67	0.26	0.69	0.86	0.8	0.00226	0.11	0.38	0.16	0.99
8086660	PRSS50	protease, serine, 50	chr3	-	0.41	0.00386	0.16	0.44	0.04	0.6	0.34	0.14	0.4	0.05	0.81	0.99	0.12	0.64	0.99
8068570	DSCR8	Down syndrome critical region gene 8	chr21	+	1.44	0.000315	0.04	1.09	0.01	0.42	0.91	0.44	0.71	1.99	3.82e-08	1.49e-05	0.17	0.39	0.99
8067208	CTCFL	CCCTC-binding factor (zinc finger protein)-like	chr20	-	3.11	1.67e-10	5.57e-06	3.55	8.63e-07	0.0016	2.91	0.05	0.23	0.6	0.00704	0.23	2.24	7.84e-09	4.35e-06
7982757	CASC5	cancer susceptibility candidate 5	chr15	+	0.57	0.00131	0.09	0.8	0.000294	0.1	1.77	2.35e-05	0.00105	0.54	0.1	0.85	0.29	0.43	0.99
7938788	LDHC	lactate dehydrogenase C	chr11	+	0.37	0.00232	0.12	0.08	0.43	0.99	-0.4	0.1	0.34	0.15	0.54	0.97	-0.28	0.37	0.99
8170052	CT45A1	cancer/testis antigen family 45, member A1	chrX	+	3.57	2.57e-06	0.00299	3.93	0.000195	0.08	2.36	0.52	0.76	2.94	1.22e-11	1.83e-08	5.12	4.43e-12	1.28e-08
	CT45A3	cancer/testis antigen family 45, member A3
	CT45A2	cancer/testis antigen family 45, member A2
	CT45A6	cancer/testis antigen family 45, member A6
	CT45A4	cancer/testis antigen family 45, member A4
	CT45A5	cancer/testis antigen family 45, member A5
8170060	CT45A2	cancer/testis antigen family 45, member A2	chrX	+	3.48	2.44e-06	0.00299	3.77	0.00028	0.1	2.26	0.5	0.75	2.57	8.15e-10	5.54e-07	4.7	6.14e-12	1.28e-08
	CT45A4	cancer/testis antigen family 45, member A4
	CT45A3	cancer/testis antigen family 45, member A3
	CT45A1	cancer/testis antigen family 45, member A1
	CT45A6	cancer/testis antigen family 45, member A6
	CT45A5	cancer/testis antigen family 45, member A5
8170068	CT45A2	cancer/testis antigen family 45, member A2	chrX	+	3.1	3.6e-06	0.00375	3.47	0.000222	0.09	1.95	0.51	0.76	2.46	1.6e-09	9.84e-07	4.51	3.19e-11	4.08e-08
	CT45A3	cancer/testis antigen family 45, member A3
	CT45A4	cancer/testis antigen family 45, member A4
	CT45A1	cancer/testis antigen family 45, member A1
	CT45A6	cancer/testis antigen family 45, member A6
	CT45A5	cancer/testis antigen family 45, member A5
8175336	CT45A2	cancer/testis antigen family 45, member A2	chrX	-	3.5	2.6e-06	0.00299	3.85	0.000255	0.09	2.27	0.5	0.75	2.69	1.2e-10	1.29e-07	4.77	4.9e-12	1.28e-08
	CT45A3	cancer/testis antigen family 45, member A3
	CT45A4	cancer/testis antigen family 45, member A4
	CT45A1	cancer/testis antigen family 45, member A1
	CT45A6	cancer/testis antigen family 45, member A6
	CT45A5	cancer/testis antigen family 45, member A5
8175344	CT45A2	cancer/testis antigen family 45, member A2	chrX	-	3.17	2.83e-06	0.00315	3.46	0.000262	0.09	1.97	0.52	0.76	2.38	3.22e-10	2.55e-07	4.28	1.58e-11	2.63e-08
	CT45A4	cancer/testis antigen family 45, member A4
	CT45A5	cancer/testis antigen family 45, member A5
	CT45A3	cancer/testis antigen family 45, member A3
	CT45A6	cancer/testis antigen family 45, member A6
8175353	CT45A2	cancer/testis antigen family 45, member A2	chrX	-	3.81	1.98e-06	0.00264	4.31	0.000144	0.07	2.55	0.5	0.76	3.11	3.89e-12	6.82e-09	5.17	2.86e-12	1.11e-08
	CT45A4	cancer/testis antigen family 45, member A4
	CT45A6	cancer/testis antigen family 45, member A6
	CT45A1	cancer/testis antigen family 45, member A1
	CT45A3	cancer/testis antigen family 45, member A3
	CT45A5	cancer/testis antigen family 45, member A5
8113385	SLCO6A1	solute carrier organic anion transporter family, member 6A1	chr5	-	0.42	0.00459	0.18	0.32	0.11	0.83	0.46	0.15	0.41	-0.17	0.53	0.97	-0.00123	0.94	0.99
8149955	PBK	PDZ binding kinase	chr8	-	0.84	0.00238	0.13	0.75	0.11	0.83	2.42	9.85e-05	0.00293	0.16	0.46	0.96	-0.07	0.86	0.99
7987636	OIP5	Opa interacting protein 5	chr15	-	0.55	3.43e-05	0.01	0.72	4.28e-05	0.03	0.08	0.93	0.97	0.05	0.86	0.99	0.01	0.95	0.99
8020653	CABYR	calcium binding tyrosine-(Y)-phosphorylation regulated	chr18	+	0.42	0.00897	0.25	0.16	0.35	0.99	0.39	0.21	0.49	0.68	0.01	0.39	0.96	0.00441	0.36
7929078	KIF20B	kinesin family member 20B	chr10	+	0.58	0.000749	0.07	0.62	0.01	0.42	0.59	0.18	0.46	0.31	0.27	0.95	0.18	0.49	0.99
8120838	TTK	TTK protein kinase	chr6	+	0.94	1.84e-05	0.01	0.94	0.00153	0.19	2.47	0.000219	0.00542	0.26	0.35	0.96	0.15	0.57	0.99
8067844	POTEB	POTE ankyrin domain family, member B	chr21	+	1.61	3.51e-09	1.55e-05	1.38	5.28e-07	0.0011	1.43	0.12	0.36	1.49	1.64e-06	0.000336	-0.06	0.91	0.99
	POTEC	POTE ankyrin domain family, member C
	POTED	POTE ankyrin domain family, member D
7986605	POTEB	POTE ankyrin domain family, member B	chr15	-	1.55	1.14e-09	1.26e-05	1.31	4e-07	0.000889	1.21	0.17	0.44	1.24	2.06e-05	0.00288	-0.00121	0.91	0.99
	POTEC	POTE ankyrin domain family, member C
	POTED	POTE ankyrin domain family, member D
8022428	POTEB	POTE ankyrin domain family, member B	chr18	-	1.47	9.67e-10	1.26e-05	1.33	1.82e-07	0.000607	1.32	0.1	0.32	1.07	1.84e-05	0.00261	-0.16	0.76	0.99
	POTEC	POTE ankyrin domain family, member C
	POTED	POTE ankyrin domain family, member D
8045257	POTEE	POTE ankyrin domain family, member E	chr2	+	1.71	5.65e-09	1.88e-05	1.98	1.2e-08	9.69e-05	2.14	0.05	0.22	0.52	0.02	0.46	0.24	0.44	0.99
	POTEF	POTE ankyrin domain family, member F
8055153	POTEE	POTE ankyrin domain family, member	chr2	-	1.72	3.46e-09	1.55e-05	2.03	9.78e-09	9.69e-05	2.34	0.04	0.2	0.65	0.00903	0.28	0.23	0.47	0.99
	POTEF	POTE ankyrin domain family, member F
	POTEI	POTE ankyrin domain family, member I
	POTEJ	POTE ankyrin domain family, member J
8055222	POTEF	POTE ankyrin domain family, member F	chr2	-	1.66	4.35e-09	1.61e-05	1.88	1.61e-08	9.69e-05	2.01	0.05	0.21	0.67	0.00476	0.18	0.28	0.42	0.99
8074170	POTEG	POTE ankyrin domain family, member G	chr22	-	1.42	9.03e-09	2.73e-05	1.43	3.92e-07	0.000889	1.19	0.12	0.36	0.29	0.12	0.87	0.19	0.49	0.99
	POTEH	POTE ankyrin domain family, member H
	POTEM	POTE ankyrin domain family, member M
8074170	POTEG	POTE ankyrin domain family, member G	chr22	-	1.42	9.03e-09	2.73e-05	1.43	3.92e-07	0.000889	1.19	0.12	0.36	0.29	0.12	0.87	0.19	0.49	0.99
	POTEH	POTE ankyrin domain family, member H
	POTEM	POTE ankyrin domain family, member M
7977456	POTEG	POTE ankyrin domain family, member G	chr14	-	1.62	2.79e-09	1.55e-05	1.69	5.16e-08	0.000245	1.44	0.13	0.38	0.49	0.01	0.44	0.3	0.36	0.99
	POTEH	POTE ankyrin domain family, member H
	POTEM	POTE ankyrin domain family, member M
7972983	POTEG	POTE ankyrin domain family, member G	chr14	+	1.31	1.44e-08	4.01e-05	1.37	3.39e-07	0.000889	1.13	0.1	0.33	0.3	0.13	0.88	0.32	0.3	0.99
	POTEM	POTE ankyrin domain family, member M
7906930	NUF2	NUF2, NDC80 kinetochore complex component, homolog (S. cerevisiae)	chr1	+	0.72	0.000242	0.04	0.9	0.00517	0.32	2.65	3.83e-05	0.00149	0.47	0.16	0.91	0.00924	0.81	0.99
7929334	CEP55	centrosomal protein 55kDa	chr10	+	0.91	4.11e-06	0.0041	1.13	0.0001	0.06	2.19	8.09e-05	0.00256	0.46	0.15	0.91	0.16	0.64	0.99
8156905	TMEFF1	transmembrane protein with EGF-like and two follistatin-like domains 1	chr9	+	0.75	0.000776	0.07	0.73	0.00836	0.38	0.71	0.34	0.63	-0.03	0.93	0.99	-0.28	0.32	0.99
	MSANTD3-TMEFF1	MSANTD3-TMEFF1 readthrough
8074856	PRAME	preferentially expressed antigen in melanoma	chr22	-	0.61	0.000223	0.03	0.94	4.53e-05	0.03	3.11	0.01	0.12	2.11	2.33e-08	9.56e-06	0.29	0.48	0.99
8152668	ATAD2	ATPase family, AAA domain containing 2	chr8	-	0.57	0.00043	0.05	0.36	0.03	0.59	0.68	0.11	0.35	0.24	0.38	0.96	-0.29	0.71	0.99
7901010	KIF2C	kinesin family member 2C	chr1	+	0.93	2.87e-07	0.000478	0.73	0.00068	0.13	1.93	4.59e-05	0.0017	0.17	0.63	0.97	0.03	0.79	0.99
