# Supplementary material for: Global DNA Hypomethylation in Epithelial Ovarian Cancer: Passive Demethylation and Association with Genomic Instability
Source: Cancers (Basel). 2020 Mar 24;12(3):764. doi: 10.3390/cancers12030764 (PMC7140107; doi:10.3390/cancers12030764)
Supplement: Supplementary file 1 [file cancers-12-00764-s001.zip › Wa_ Supplementary Table 5 Epigenetic DEG Summary.xlsx]

## Sheet: Epi-DEGs of all EOCs
Zhang et al. Supplementary Table 5. Differentially expressed epigenetic related genes of all GDHO(+) EOC vs. GDHO(‒) EOC (P≤0.05)
Affymetrix HG 1.0ST Arrays
				All Samples
Probe_ID	Gene Symbol	Gene Title	chr	GDHO(+) vs. GDHO(−)
				Log2	p-value
8034772	ASF1B	ASF1 anti-silencing function 1 homolog B (S. cerevisiae)	chr19	0.92	1.54e-05
8171561	SCML2	sex comb on midleg-like 2 (Drosophila)	chrX	0.61	0.0024
8152668	ATAD2	ATPase family, AAA domain containing 2	chr8	0.57	0.00043
7901192	RAD54L	RAD54-like (S. cerevisiae)	chr1	0.52	0.000107
8083709	SMC4	structural maintenance of chromosomes 4	chr3	0.52	0.00417
8156982	SMC2	structural maintenance of chromosomes 2	chr9	0.51	0.01
8173506	ERCC6L	excision repair cross-complementing rodent repair deficiency, complementation group 6-like	chrX	0.49	0.00201
7898833	KDM1A	lysine (K)-specific demethylase 1A	chr1	0.47	0.00313
8091354	HLTF	helicase-like transcription factor	chr3	0.46	0.02
8084067	ACTL6A	actin-like 6A	chr3	0.45	0.00843
7900833	KDM4A	lysine (K)-specific demethylase 4A	chr1	0.44	0.00194
7904314	TTF2	transcription termination factor, RNA polymerase II	chr1	0.42	0.00537
8146579	CHD7	chromodomain helicase DNA binding protein 7	chr8	0.39	0.04
8125172	EHMT2	euchromatic histone-lysine N-methyltransferase 2	chr6	0.35	0.00579
8179884	EHMT2	euchromatic histone-lysine N-methyltransferase 2	chr6	0.35	0.00579
8062705	L3MBTL1	l(3)mbt-like 1 (Drosophila)	chr20	0.34	0.03
7899220	ARID1A	AT rich interactive domain 1A (SWI-like)	chr1	0.33	0.02
8167347	SUV39H1	suppressor of variegation 3-9 homolog 1 (Drosophila)	chrX	0.32	0.01
7955331	SMARCD1	SWI/SNF related, matrix associated, actin dependent regulator of chromatin, subfamily d, member 1	chr12	0.31	0.00765
7899774	HDAC1	histone deacetylase 1	chr1	0.31	0.04
8088065	SFMBT1	Scm-like with four mbt domains 1	chr3	0.28	0.04
8163525	POLE3	polymerase (DNA directed), epsilon 3, accessory subunit	chr9	0.27	0.04
7994889	SRCAP	Snf2-related CREBBP activator protein	chr16	0.27	0.05
7948192	SSRP1	structure specific recognition protein 1	chr11	0.27	0.05
7926319	SUV39H2	suppressor of variegation 3-9 homolog 2 (Drosophila)	chr10	0.26	0.03
7956470	MBD6	methyl-CpG binding domain protein 6	chr12	0.26	0.05
8034983	BRD4	bromodomain containing 4	chr19	0.25	0.02
8041888	MSH6	mutS homolog 6 (E. coli)	chr2	0.25	0.03
7995055	KAT8	K(lysine) acetyltransferase 8	chr16	0.25	0.05
7899187	HMGN2	high mobility group nucleosomal binding domain 2	chr1	0.25	0.05
8061746	DNMT3B	DNA (cytosine-5-)-methyltransferase 3 beta	chr20	0.23	0.03
7943282	KDM4D	lysine (K)-specific demethylase 4D	chr11	0.21	0.04
7933877	JMJD1C	jumonji domain containing 1C	chr10	-0.24	0.04
8176276	ATRX	alpha thalassemia/mental retardation syndrome X-linked	chrX	-0.25	0.02
8176276	ATRX	alpha thalassemia/mental retardation syndrome X-linked	chrX	-0.25	0.02
8023382	MBD2	methyl-CpG binding domain protein 2	chr18	-0.26	0.05
8076836	BRD1	bromodomain containing 1	chr22	-0.27	0.03
7943620	ATM	ataxia telangiectasia mutated	chr11	-0.27	0.04
8156604	ERCC6L2	excision repair cross-complementing rodent repair deficiency, complementation group 6-like 2	chr9	-0.31	0.02
8154059	SMARCA2	SWI/SNF related, matrix associated, actin dependent regulator of chromatin, subfamily a, member 2	chr9	-0.31	0.05
8166956	KDM6A	lysine (K)-specific demethylase 6A	chrX	-0.37	0.05
8173673	ATRX	alpha thalassemia/mental retardation syndrome X-linked	chrX	-0.39	0.00164
8173673	ATRX	alpha thalassemia/mental retardation syndrome X-linked	chrX	-0.39	0.00164
8122013	L3MBTL3	l(3)mbt-like 3 (Drosophila)	chr6	-0.49	0.05
8102848	SETD7	SET domain containing (lysine methyltransferase) 7	chr4	-0.67	0.00868

## Sheet: Epi-DEGs of disease matched EOC
Zhang et al. Supplementary Table 5. Differentially expressed epigenetic related genes of disease-matched GDHO(+) EOC vs. GDHO(‒) EOC (P≤0.05)
Affymetrix HG 1.0ST Arrays
				Disease-Matched
Probe_ID	Gene Symbol	Gene Title	chr	GDHO(+) vs. GDHO(−)
				Log2	p-value
8034772	ASF1B	ASF1 anti-silencing function 1 homolog B (S. cerevisiae)	chr19	0.81	0.000278933
8173506	ERCC6L	excision repair cross-complementing rodent repair deficiency, complementation group 6-like	chrX	0.6	0.01
8146579	CHD7	chromodomain helicase DNA binding protein 7	chr8	0.56	0.02
7956867	HMGA2	high mobility group AT-hook 2	chr12	0.51	0.04
8151824	RAD54B	fibrinogen silencer binding protein /// RAD54 homolog B (S. cerevisiae)	chr8	0.51	0.04
7898833	KDM1A	lysine (K)-specific demethylase 1A	chr1	0.49	0.01
7900833	KDM4A	lysine (K)-specific demethylase 4A	chr1	0.44	0.04
8125172	EHMT2	euchromatic histone-lysine N-methyltransferase 2	chr6	0.42	0.01
8179884	EHMT2	euchromatic histone-lysine N-methyltransferase 2	chr6	0.42	0.01
7899220	ARID1A	AT rich interactive domain 1A (SWI-like)	chr1	0.42	0.01
8171561	SCML2	sex comb on midleg-like 2 (Drosophila)	chrX	0.41	0.04
8034983	BRD4	bromodomain containing 4	chr19	0.38	0.02
7901192	RAD54L	RAD54-like (S. cerevisiae)	chr1	0.37	0.01
7955331	SMARCD1	SWI/SNF related, matrix associated, actin dependent regulator of chromatin, subfamily d, member 1	chr12	0.36	0.02
8152668	ATAD2	ATPase family, AAA domain containing 2	chr8	0.36	0.03
8042811	TET3	tet methylcytosine dioxygenase 3	chr2	0.34	0.02
7956470	MBD6	methyl-CpG binding domain protein 6	chr12	0.33	0.05
8083092	ZBTB38	zinc finger and BTB domain containing 38	chr3	-0.4	0.05
8078227	KAT2B	K(lysine) acetyltransferase 2B	chr3	-0.41	0.02
7943620	ATM	ataxia telangiectasia mutated	chr11	-0.43	0.02
8176276	ATRX	alpha thalassemia/mental retardation syndrome X-linked	chrX	-0.44	0.01
8176276	ATRX	alpha thalassemia/mental retardation syndrome X-linked	chrX	-0.44	0.01
8131631	HDAC9	histone deacetylase 9	chr7	-0.47	0.02
8150287	WHSC1L1	Wolf-Hirschhorn syndrome candidate 1-like 1	chr8	-0.49	0.00844048
8173673	ATRX	alpha thalassemia/mental retardation syndrome X-linked	chrX	-0.51	0.00201747
8173673	ATRX	alpha thalassemia/mental retardation syndrome X-linked	chrX	-0.51	0.00201747
8154178	JAK2	Janus kinase 2	chr9	-0.53	0.01
8154059	SMARCA2	SWI/SNF related, matrix associated, actin dependent regulator of chromatin, subfamily a, member 2	chr9	-0.54	0.00699143
8166278	SCML1	sex comb on midleg-like 1 (Drosophila)	chrX	-0.55	0.00116387
8102848	SETD7	SET domain containing (lysine methyltransferase) 7	chr4	-0.76	0.03
