# Supplementary material for: Global DNA Hypomethylation in Epithelial Ovarian Cancer: Passive Demethylation and Association with Genomic Instability
Source: Cancers (Basel). 2020 Mar 24;12(3):764. doi: 10.3390/cancers12030764 (PMC7140107; doi:10.3390/cancers12030764)
Supplement: Supplementary file 1 [file cancers-12-00764-s001.zip › Wa_ Supplementary Table 6 Histone DEG Summary.xlsx]

## Sheet: histone-DEGs of all EOCs
Zhang et al. Supplementary Table 6. Differentially expressed histone genes of all GDHO(+) EOC vs. GDHO(‒) EOC (P≤0.05)
Affymetrix HG 1.0ST Arrays
				All Samples
Probe_ID	Gene Symbol	Gene Title	chr	GDHO(+) vs. GDHO(−)
				Log2	p-value
8124380	HIST1H1A	histone cluster 1, H1a	chr6	1.21	7.94e-06
8124531	HIST1H3I /// HIST1H3F /// HIST1H3B /// HIST1H3H /// HIST1H3J /// HIST1H3G /// HIST1H3E /// HIST1H3C /// HIST1H3D /// HIST1H3A	histone cluster 1, H3i /// histone cluster 1, H3f /// histone cluster 1, H3b /// histone cluster 1, H3h /// histone cluster 1, H3j /// histone cluster 1, H3g /// histone cluster 1, H3e /// histone cluster 1, H3c /// histone cluster 1, H3d /// histone cluster 1, H3a	chr6	1.12	3.6e-07
8124388	HIST1H3B /// HIST1H3F /// HIST1H3H /// HIST1H3J /// HIST1H3G /// HIST1H3I /// HIST1H3E /// HIST1H3C /// HIST1H3D /// HIST1H3A	histone cluster 1, H3b /// histone cluster 1, H3f /// histone cluster 1, H3h /// histone cluster 1, H3j /// histone cluster 1, H3g /// histone cluster 1, H3i /// histone cluster 1, H3e /// histone cluster 1, H3c /// histone cluster 1, H3d /// histone cluster 1, H3a	chr6	1.01	2.18e-05
8117594	HIST1H2BM	histone cluster 1, H2bm	chr6	1	0.0023
8124527	HIST1H1B	histone cluster 1, H1b	chr6	0.81	0.00102
8124534	HIST1H4L /// HIST2H4B /// HIST4H4 /// HIST2H4A /// HIST1H4E /// HIST1H4B /// HIST1H4H /// HIST1H4C /// HIST1H4J /// HIST1H4K /// HIST1H4F /// HIST1H4D /// HIST1H4A /// HIST1H4I	histone cluster 1, H4l /// histone cluster 2, H4b /// histone cluster 4, H4 /// histone cluster 2, H4a /// histone cluster 1, H4e /// histone cluster 1, H4b /// histone cluster 1, H4h /// histone cluster 1, H4c /// histone cluster 1, H4j /// histone cluster 1, H4k /// histone cluster 1, H4f /// histone cluster 1, H4d /// histone cluster 1, H4a /// histone cluster 1, H4i	chr6	0.71	9.87e-05
8124437	HIST1H3F /// HIST1H3B /// HIST1H3H /// HIST1H3J /// HIST1H3G /// HIST1H3I /// HIST1H3E /// HIST1H3C /// HIST1H3D /// HIST1H3A	histone cluster 1, H3f /// histone cluster 1, H3b /// histone cluster 1, H3h /// histone cluster 1, H3j /// histone cluster 1, H3g /// histone cluster 1, H3i /// histone cluster 1, H3e /// histone cluster 1, H3c /// histone cluster 1, H3d /// histone cluster 1, H3a	chr6	0.7	2.48e-05
8117395	HIST1H2BF /// HIST1H2BC /// HIST1H2BI /// HIST1H2BE /// HIST1H2BG	histone cluster 1, H2bf /// histone cluster 1, H2bc /// histone cluster 1, H2bi /// histone cluster 1, H2be /// histone cluster 1, H2bg	chr6	0.66	0.000796
8124416	HIST1H3D /// HIST1H2AD /// HIST1H3F /// HIST1H3B /// HIST1H3H /// HIST1H3J /// HIST1H3G /// HIST1H3I /// HIST1H3E /// HIST1H3C /// HIST1H3A	histone cluster 1, H3d /// histone cluster 1, H2ad /// histone cluster 1, H3f /// histone cluster 1, H3b /// histone cluster 1, H3h /// histone cluster 1, H3j /// histone cluster 1, H3g /// histone cluster 1, H3i /// histone cluster 1, H3e /// histone cluster 1, H3c /// histone cluster 1, H3a	chr6	0.64	7.42e-05
8124391	HIST1H2AB /// HIST1H2AE	histone cluster 1, H2ab /// histone cluster 1, H2ae	chr6	0.63	3.17e-05
7919642	HIST2H2AB	histone cluster 2, H2ab	chr1	0.63	0.00193
8117368	HIST1H4C /// HIST2H4B /// HIST4H4 /// HIST2H4A /// HIST1H4L /// HIST1H4E /// HIST1H4B /// HIST1H4H /// HIST1H4J /// HIST1H4K /// HIST1H4F /// HIST1H4D /// HIST1H4A /// HIST1H4I	histone cluster 1, H4c /// histone cluster 2, H4b /// histone cluster 4, H4 /// histone cluster 2, H4a /// histone cluster 1, H4l /// histone cluster 1, H4e /// histone cluster 1, H4b /// histone cluster 1, H4h /// histone cluster 1, H4j /// histone cluster 1, H4k /// histone cluster 1, H4f /// histone cluster 1, H4d /// histone cluster 1, H4a /// histone cluster 1, H4i	chr6	0.59	0.000386
8117426	HIST1H2BH	histone cluster 1, H2bh	chr6	0.57	0.00149
8124413	HIST1H4D /// HIST2H4B /// HIST4H4 /// HIST2H4A /// HIST1H4L /// HIST1H4E /// HIST1H4B /// HIST1H4H /// HIST1H4C /// HIST1H4J /// HIST1H4K /// HIST1H4F /// HIST1H4A /// HIST1H4I	histone cluster 1, H4d /// histone cluster 2, H4b /// histone cluster 4, H4 /// histone cluster 2, H4a /// histone cluster 1, H4l /// histone cluster 1, H4e /// histone cluster 1, H4b /// histone cluster 1, H4h /// histone cluster 1, H4c /// histone cluster 1, H4j /// histone cluster 1, H4k /// histone cluster 1, H4f /// histone cluster 1, H4a /// histone cluster 1, H4i	chr6	0.57	0.00191
8124448	HIST2H4B /// HIST4H4 /// HIST2H4A /// HIST1H4L /// HIST1H4E /// HIST1H4B /// HIST1H4H /// HIST1H4C /// HIST1H4J /// HIST1H4K /// HIST1H4F /// HIST1H4D /// HIST1H4A /// HIST1H4I	histone cluster 2, H4b /// histone cluster 4, H4 /// histone cluster 2, H4a /// histone cluster 1, H4l /// histone cluster 1, H4e /// histone cluster 1, H4b /// histone cluster 1, H4h /// histone cluster 1, H4c /// histone cluster 1, H4j /// histone cluster 1, H4k /// histone cluster 1, H4f /// histone cluster 1, H4d /// histone cluster 1, H4a /// histone cluster 1, H4i	chr6	0.55	0.03
7919612	HIST2H3C /// HIST2H3A /// HIST2H3D	histone cluster 2, H3c /// histone cluster 2, H3a /// histone cluster 2, H3d	chr1	0.54	0.000274
8117408	HIST1H2AB /// HIST1H2AE	histone cluster 1, H2ab /// histone cluster 1, H2ae	chr6	0.54	0.000738
8124518	HIST1H2AJ	histone cluster 1, H2aj	chr6	0.53	0.000917
8124537	HIST1H3F /// HIST1H3B /// HIST1H3H /// HIST1H3J /// HIST1H3G /// HIST1H3I /// HIST1H3E /// HIST1H3C /// HIST1H3D /// HIST1H3A	histone cluster 1, H3f /// histone cluster 1, H3b /// histone cluster 1, H3h /// histone cluster 1, H3j /// histone cluster 1, H3g /// histone cluster 1, H3i /// histone cluster 1, H3e /// histone cluster 1, H3c /// histone cluster 1, H3d /// histone cluster 1, H3a	chr6	0.52	0.000109
8117422	HIST1H4F /// HIST2H4B /// HIST4H4 /// HIST2H4A /// HIST1H4L /// HIST1H4E /// HIST1H4B /// HIST1H4H /// HIST1H4C /// HIST1H4J /// HIST1H4K /// HIST1H4D /// HIST1H4A /// HIST1H4I	histone cluster 1, H4f /// histone cluster 2, H4b /// histone cluster 4, H4 /// histone cluster 2, H4a /// histone cluster 1, H4l /// histone cluster 1, H4e /// histone cluster 1, H4b /// histone cluster 1, H4h /// histone cluster 1, H4c /// histone cluster 1, H4j /// histone cluster 1, H4k /// histone cluster 1, H4d /// histone cluster 1, H4a /// histone cluster 1, H4i	chr6	0.51	0.00199
7919589	HIST2H3C /// HIST2H3A /// HIST2H3D	histone cluster 2, H3c /// histone cluster 2, H3a /// histone cluster 2, H3d	chr1	0.47	0.000672
8117377	HIST1H1E	histone cluster 1, H1e	chr6	0.47	0.00904
7905085	HIST2H3C /// HIST2H3A /// HIST2H3D	histone cluster 2, H3c /// histone cluster 2, H3a /// histone cluster 2, H3d	chr1	0.45	0.000927
7919614	HIST2H3C /// HIST2H3A /// HIST2H3D	histone cluster 2, H3c /// histone cluster 2, H3a /// histone cluster 2, H3d	chr1	0.45	0.000927
8101945	H2AFZ	H2A histone family, member Z	chr4	0.45	0.01
8124521	HIST1H4J /// HIST2H4B /// HIST4H4 /// HIST2H4A /// HIST1H4L /// HIST1H4E /// HIST1H4B /// HIST1H4H /// HIST1H4C /// HIST1H4K /// HIST1H4F /// HIST1H4D /// HIST1H4A /// HIST1H4I	histone cluster 1, H4j /// histone cluster 2, H4b /// histone cluster 4, H4 /// histone cluster 2, H4a /// histone cluster 1, H4l /// histone cluster 1, H4e /// histone cluster 1, H4b /// histone cluster 1, H4h /// histone cluster 1, H4c /// histone cluster 1, H4k /// histone cluster 1, H4f /// histone cluster 1, H4d /// histone cluster 1, H4a /// histone cluster 1, H4i	chr6	0.43	0.00408
8068898	HIST1H2BK /// H2BFS	histone cluster 1, H2bk /// H2B histone family, member S (pseudogene)	chr21	0.43	0.00761
7905079	HIST2H2AA3 /// HIST2H2AA4	histone cluster 2, H2aa3 /// histone cluster 2, H2aa4	chr1	0.42	0.01
7919619	HIST2H2AA3 /// HIST2H2AA4	histone cluster 2, H2aa3 /// histone cluster 2, H2aa4	chr1	0.42	0.01
8124406	HIST1H2BC /// HIST1H2BI /// HIST1H2BE /// HIST1H2BF /// HIST1H2BG	histone cluster 1, H2bc /// histone cluster 1, H2bi /// histone cluster 1, H2be /// histone cluster 1, H2bf /// histone cluster 1, H2bg	chr6	0.41	0.03
7905088	HIST2H2AC	histone cluster 2, H2ac	chr1	0.39	0.01
8124397	HIST1H1C	histone cluster 1, H1c	chr6	0.39	0.02
8124385	HIST1H4B /// HIST2H4B /// HIST4H4 /// HIST2H4A /// HIST1H4L /// HIST1H4E /// HIST1H4H /// HIST1H4C /// HIST1H4J /// HIST1H4K /// HIST1H4F /// HIST1H4D /// HIST1H4A /// HIST1H4I	histone cluster 1, H4b /// histone cluster 2, H4b /// histone cluster 4, H4 /// histone cluster 2, H4a /// histone cluster 1, H4l /// histone cluster 1, H4e /// histone cluster 1, H4h /// histone cluster 1, H4c /// histone cluster 1, H4j /// histone cluster 1, H4k /// histone cluster 1, H4f /// histone cluster 1, H4d /// histone cluster 1, H4a /// histone cluster 1, H4i	chr6	0.39	0.02
8124423	HIST1H2BC /// HIST1H2BI /// HIST1H2BE /// HIST1H2BF /// HIST1H2BG	histone cluster 1, H2bc /// histone cluster 1, H2bi /// histone cluster 1, H2be /// histone cluster 1, H2bf /// histone cluster 1, H2bg	chr6	0.39	0.03
8117598	HIST2H4B /// HIST4H4 /// HIST2H4A /// HIST1H4L /// HIST1H4E /// HIST1H4B /// HIST1H4H /// HIST1H4C /// HIST1H4J /// HIST1H4K /// HIST1H4F /// HIST1H4D /// HIST1H4A /// HIST1H4I	histone cluster 2, H4b /// histone cluster 4, H4 /// histone cluster 2, H4a /// histone cluster 1, H4l /// histone cluster 1, H4e /// histone cluster 1, H4b /// histone cluster 1, H4h /// histone cluster 1, H4c /// histone cluster 1, H4j /// histone cluster 1, H4k /// histone cluster 1, H4f /// histone cluster 1, H4d /// histone cluster 1, H4a /// histone cluster 1, H4i	chr6	0.38	0.00352
8117429	HIST1H2BI /// HIST1H2BC /// HIST1H2BE /// HIST1H2BF /// HIST1H2BG	histone cluster 1, H2bi /// histone cluster 1, H2bc /// histone cluster 1, H2be /// histone cluster 1, H2bf /// histone cluster 1, H2bg	chr6	0.38	0.00527
8124430	HIST1H1D	histone cluster 1, H1d	chr6	0.37	0.00425
8117402	HIST2H4B /// HIST4H4 /// HIST2H4A /// HIST1H4L /// HIST1H4E /// HIST1H4B /// HIST1H4H /// HIST1H4C /// HIST1H4J /// HIST1H4K /// HIST1H4F /// HIST1H4D /// HIST1H4A /// HIST1H4I	histone cluster 2, H4b /// histone cluster 4, H4 /// histone cluster 2, H4a /// histone cluster 1, H4l /// histone cluster 1, H4e /// histone cluster 1, H4b /// histone cluster 1, H4h /// histone cluster 1, H4c /// histone cluster 1, H4j /// histone cluster 1, H4k /// histone cluster 1, H4f /// histone cluster 1, H4d /// histone cluster 1, H4a /// histone cluster 1, H4i	chr6	0.35	0.03
8117330	HIST1H3A /// HIST1H3F /// HIST1H3B /// HIST1H3H /// HIST1H3J /// HIST1H3G /// HIST1H3I /// HIST1H3E /// HIST1H3C /// HIST1H3D	histone cluster 1, H3a /// histone cluster 1, H3f /// histone cluster 1, H3b /// histone cluster 1, H3h /// histone cluster 1, H3j /// histone cluster 1, H3g /// histone cluster 1, H3i /// histone cluster 1, H3e /// histone cluster 1, H3c /// histone cluster 1, H3d	chr6	0.34	0.01
7952179	H2AFX	H2A histone family, member X	chr11	0.31	0.00411
8117535	HIST1H2AG /// HIST1H2AH /// HIST1H2AM /// HIST1H2AL /// HIST1H2AK /// HIST1H2AI	histone cluster 1, H2ag /// histone cluster 1, H2ah /// histone cluster 1, H2am /// histone cluster 1, H2al /// histone cluster 1, H2ak /// histone cluster 1, H2ai	chr6	0.31	0.03
8117543	HIST1H2AH	histone cluster 1, H2ah	chr6	0.3	0.00919
8124524	HIST1H2AK /// HIST1H2AH /// HIST1H2AG /// HIST1H2AM /// HIST1H2AL /// HIST1H2AI	histone cluster 1, H2ak /// histone cluster 1, H2ah /// histone cluster 1, H2ag /// histone cluster 1, H2am /// histone cluster 1, H2al /// histone cluster 1, H2ai	chr6	0.3	0.03
8117580	HIST1H2AI /// HIST1H2AH /// HIST1H2AG /// HIST1H2AM /// HIST1H2AL /// HIST1H2AK	histone cluster 1, H2ai /// histone cluster 1, H2ah /// histone cluster 1, H2ag /// histone cluster 1, H2am /// histone cluster 1, H2al /// histone cluster 1, H2ak	chr6	0.29	0.00686
8117608	HIST1H2AL /// HIST1H2AH /// HIST1H2AG /// HIST1H2AM /// HIST1H2AK /// HIST1H2AI	histone cluster 1, H2al /// histone cluster 1, H2ah /// histone cluster 1, H2ag /// histone cluster 1, H2am /// histone cluster 1, H2ak /// histone cluster 1, H2ai	chr6	0.28	0.01
7919625	HIST2H2BC	histone cluster 2, H2bc (pseudogene)	chr1	0.28	0.03
8117600	HIST1H2BN	histone cluster 1, H2bn	chr6	0.27	0.02
8117389	HIST1H2BE /// HIST1H2BC /// HIST1H2BI /// HIST1H2BF /// HIST1H2BG	histone cluster 1, H2be /// histone cluster 1, H2bc /// histone cluster 1, H2bi /// histone cluster 1, H2bf /// histone cluster 1, H2bg	chr6	0.26	0.01
8090555	H1FX	H1 histone family, member X	chr3	0.23	0.04
8124446	HIST1H2APS4	histone cluster 1, H2a, pseudogene 4	chr6	0.22	0.04
8117537	HIST2H4B /// HIST4H4 /// HIST2H4A /// HIST1H4L /// HIST1H4E /// HIST1H4B /// HIST1H4H /// HIST1H4C /// HIST1H4J /// HIST1H4K /// HIST1H4F /// HIST1H4D /// HIST1H4A /// HIST1H4I	histone cluster 2, H4b /// histone cluster 4, H4 /// histone cluster 2, H4a /// histone cluster 1, H4l /// histone cluster 1, H4e /// histone cluster 1, H4b /// histone cluster 1, H4h /// histone cluster 1, H4c /// histone cluster 1, H4j /// histone cluster 1, H4k /// histone cluster 1, H4f /// histone cluster 1, H4d /// histone cluster 1, H4a /// histone cluster 1, H4i	chr6	0.22	0.04

## Sheet: histone-DEGs of matched EOCs
Zhang et al. Supplementary Table 6. Differentially expressed histone genes of disease-matched GDHO(+) EOC vs. GDHO(‒) EOC (P≤0.05)
Affymetrix HG 1.0ST Arrays
				Disease-Matched
Probe_ID	Gene Symbol	Gene Title	chr	GDHO(+) vs. GDHO(−)
				Log2	p-value
8124380	HIST1H1A	histone cluster 1, H1a	chr6	1.3	0.000348417
8124388	HIST1H3B /// HIST1H3F /// HIST1H3H /// HIST1H3J /// HIST1H3G /// HIST1H3I /// HIST1H3E /// HIST1H3C /// HIST1H3D /// HIST1H3A	histone cluster 1, H3b /// histone cluster 1, H3f /// histone cluster 1, H3h /// histone cluster 1, H3j /// histone cluster 1, H3g /// histone cluster 1, H3i /// histone cluster 1, H3e /// histone cluster 1, H3c /// histone cluster 1, H3d /// histone cluster 1, H3a	chr6	1.18	0.000573317
8117594	HIST1H2BM	histone cluster 1, H2bm	chr6	1.07	0.03
8124531	HIST1H3I /// HIST1H3F /// HIST1H3B /// HIST1H3H /// HIST1H3J /// HIST1H3G /// HIST1H3E /// HIST1H3C /// HIST1H3D /// HIST1H3A	histone cluster 1, H3i /// histone cluster 1, H3f /// histone cluster 1, H3b /// histone cluster 1, H3h /// histone cluster 1, H3j /// histone cluster 1, H3g /// histone cluster 1, H3e /// histone cluster 1, H3c /// histone cluster 1, H3d /// histone cluster 1, H3a	chr6	1.02	0.000567624
8124527	HIST1H1B	histone cluster 1, H1b	chr6	1.01	0.000536906
8124448	HIST2H4B /// HIST4H4 /// HIST2H4A /// HIST1H4L /// HIST1H4E /// HIST1H4B /// HIST1H4H /// HIST1H4C /// HIST1H4J /// HIST1H4K /// HIST1H4F /// HIST1H4D /// HIST1H4A /// HIST1H4I	histone cluster 2, H4b /// histone cluster 4, H4 /// histone cluster 2, H4a /// histone cluster 1, H4l /// histone cluster 1, H4e /// histone cluster 1, H4b /// histone cluster 1, H4h /// histone cluster 1, H4c /// histone cluster 1, H4j /// histone cluster 1, H4k /// histone cluster 1, H4f /// histone cluster 1, H4d /// histone cluster 1, H4a /// histone cluster 1, H4i	chr6	0.92	0.02
8117368	HIST1H4C /// HIST2H4B /// HIST4H4 /// HIST2H4A /// HIST1H4L /// HIST1H4E /// HIST1H4B /// HIST1H4H /// HIST1H4J /// HIST1H4K /// HIST1H4F /// HIST1H4D /// HIST1H4A /// HIST1H4I	histone cluster 1, H4c /// histone cluster 2, H4b /// histone cluster 4, H4 /// histone cluster 2, H4a /// histone cluster 1, H4l /// histone cluster 1, H4e /// histone cluster 1, H4b /// histone cluster 1, H4h /// histone cluster 1, H4j /// histone cluster 1, H4k /// histone cluster 1, H4f /// histone cluster 1, H4d /// histone cluster 1, H4a /// histone cluster 1, H4i	chr6	0.85	0.00129732
8124534	HIST1H4L /// HIST2H4B /// HIST4H4 /// HIST2H4A /// HIST1H4E /// HIST1H4B /// HIST1H4H /// HIST1H4C /// HIST1H4J /// HIST1H4K /// HIST1H4F /// HIST1H4D /// HIST1H4A /// HIST1H4I	histone cluster 1, H4l /// histone cluster 2, H4b /// histone cluster 4, H4 /// histone cluster 2, H4a /// histone cluster 1, H4e /// histone cluster 1, H4b /// histone cluster 1, H4h /// histone cluster 1, H4c /// histone cluster 1, H4j /// histone cluster 1, H4k /// histone cluster 1, H4f /// histone cluster 1, H4d /// histone cluster 1, H4a /// histone cluster 1, H4i	chr6	0.79	0.00094498
8124437	HIST1H3F /// HIST1H3B /// HIST1H3H /// HIST1H3J /// HIST1H3G /// HIST1H3I /// HIST1H3E /// HIST1H3C /// HIST1H3D /// HIST1H3A	histone cluster 1, H3f /// histone cluster 1, H3b /// histone cluster 1, H3h /// histone cluster 1, H3j /// histone cluster 1, H3g /// histone cluster 1, H3i /// histone cluster 1, H3e /// histone cluster 1, H3c /// histone cluster 1, H3d /// histone cluster 1, H3a	chr6	0.78	0.000712952
8124413	HIST1H4D /// HIST2H4B /// HIST4H4 /// HIST2H4A /// HIST1H4L /// HIST1H4E /// HIST1H4B /// HIST1H4H /// HIST1H4C /// HIST1H4J /// HIST1H4K /// HIST1H4F /// HIST1H4A /// HIST1H4I	histone cluster 1, H4d /// histone cluster 2, H4b /// histone cluster 4, H4 /// histone cluster 2, H4a /// histone cluster 1, H4l /// histone cluster 1, H4e /// histone cluster 1, H4b /// histone cluster 1, H4h /// histone cluster 1, H4c /// histone cluster 1, H4j /// histone cluster 1, H4k /// histone cluster 1, H4f /// histone cluster 1, H4a /// histone cluster 1, H4i	chr6	0.78	0.00616197
8124391	HIST1H2AB /// HIST1H2AE	histone cluster 1, H2ab /// histone cluster 1, H2ae	chr6	0.77	0.000508543
8117395	HIST1H2BF /// HIST1H2BC /// HIST1H2BI /// HIST1H2BE /// HIST1H2BG	histone cluster 1, H2bf /// histone cluster 1, H2bc /// histone cluster 1, H2bi /// histone cluster 1, H2be /// histone cluster 1, H2bg	chr6	0.76	0.01
8124518	HIST1H2AJ	histone cluster 1, H2aj	chr6	0.72	0.00299045
8124406	HIST1H2BC /// HIST1H2BI /// HIST1H2BE /// HIST1H2BF /// HIST1H2BG	histone cluster 1, H2bc /// histone cluster 1, H2bi /// histone cluster 1, H2be /// histone cluster 1, H2bf /// histone cluster 1, H2bg	chr6	0.71	0.03
8124416	HIST1H3D /// HIST1H2AD /// HIST1H3F /// HIST1H3B /// HIST1H3H /// HIST1H3J /// HIST1H3G /// HIST1H3I /// HIST1H3E /// HIST1H3C /// HIST1H3A	histone cluster 1, H3d /// histone cluster 1, H2ad /// histone cluster 1, H3f /// histone cluster 1, H3b /// histone cluster 1, H3h /// histone cluster 1, H3j /// histone cluster 1, H3g /// histone cluster 1, H3i /// histone cluster 1, H3e /// histone cluster 1, H3c /// histone cluster 1, H3a	chr6	0.68	0.00379727
8117408	HIST1H2AB /// HIST1H2AE	histone cluster 1, H2ab /// histone cluster 1, H2ae	chr6	0.66	0.00484317
8117402	HIST2H4B /// HIST4H4 /// HIST2H4A /// HIST1H4L /// HIST1H4E /// HIST1H4B /// HIST1H4H /// HIST1H4C /// HIST1H4J /// HIST1H4K /// HIST1H4F /// HIST1H4D /// HIST1H4A /// HIST1H4I	histone cluster 2, H4b /// histone cluster 4, H4 /// histone cluster 2, H4a /// histone cluster 1, H4l /// histone cluster 1, H4e /// histone cluster 1, H4b /// histone cluster 1, H4h /// histone cluster 1, H4c /// histone cluster 1, H4j /// histone cluster 1, H4k /// histone cluster 1, H4f /// histone cluster 1, H4d /// histone cluster 1, H4a /// histone cluster 1, H4i	chr6	0.65	0.00302242
8117330	HIST1H3A /// HIST1H3F /// HIST1H3B /// HIST1H3H /// HIST1H3J /// HIST1H3G /// HIST1H3I /// HIST1H3E /// HIST1H3C /// HIST1H3D	histone cluster 1, H3a /// histone cluster 1, H3f /// histone cluster 1, H3b /// histone cluster 1, H3h /// histone cluster 1, H3j /// histone cluster 1, H3g /// histone cluster 1, H3i /// histone cluster 1, H3e /// histone cluster 1, H3c /// histone cluster 1, H3d	chr6	0.63	0.00162751
7919612	HIST2H3C /// HIST2H3A /// HIST2H3D	histone cluster 2, H3c /// histone cluster 2, H3a /// histone cluster 2, H3d	chr1	0.62	0.00290246
8124537	HIST1H3F /// HIST1H3B /// HIST1H3H /// HIST1H3J /// HIST1H3G /// HIST1H3I /// HIST1H3E /// HIST1H3C /// HIST1H3D /// HIST1H3A	histone cluster 1, H3f /// histone cluster 1, H3b /// histone cluster 1, H3h /// histone cluster 1, H3j /// histone cluster 1, H3g /// histone cluster 1, H3i /// histone cluster 1, H3e /// histone cluster 1, H3c /// histone cluster 1, H3d /// histone cluster 1, H3a	chr6	0.61	0.000784843
8124385	HIST1H4B /// HIST2H4B /// HIST4H4 /// HIST2H4A /// HIST1H4L /// HIST1H4E /// HIST1H4H /// HIST1H4C /// HIST1H4J /// HIST1H4K /// HIST1H4F /// HIST1H4D /// HIST1H4A /// HIST1H4I	histone cluster 1, H4b /// histone cluster 2, H4b /// histone cluster 4, H4 /// histone cluster 2, H4a /// histone cluster 1, H4l /// histone cluster 1, H4e /// histone cluster 1, H4h /// histone cluster 1, H4c /// histone cluster 1, H4j /// histone cluster 1, H4k /// histone cluster 1, H4f /// histone cluster 1, H4d /// histone cluster 1, H4a /// histone cluster 1, H4i	chr6	0.6	0.00686211
8124521	HIST1H4J /// HIST2H4B /// HIST4H4 /// HIST2H4A /// HIST1H4L /// HIST1H4E /// HIST1H4B /// HIST1H4H /// HIST1H4C /// HIST1H4K /// HIST1H4F /// HIST1H4D /// HIST1H4A /// HIST1H4I	histone cluster 1, H4j /// histone cluster 2, H4b /// histone cluster 4, H4 /// histone cluster 2, H4a /// histone cluster 1, H4l /// histone cluster 1, H4e /// histone cluster 1, H4b /// histone cluster 1, H4h /// histone cluster 1, H4c /// histone cluster 1, H4k /// histone cluster 1, H4f /// histone cluster 1, H4d /// histone cluster 1, H4a /// histone cluster 1, H4i	chr6	0.58	0.01
8117426	HIST1H2BH	histone cluster 1, H2bh	chr6	0.57	0.02
7905085	HIST2H3C /// HIST2H3A /// HIST2H3D	histone cluster 2, H3c /// histone cluster 2, H3a /// histone cluster 2, H3d	chr1	0.54	0.00576142
7919614	HIST2H3C /// HIST2H3A /// HIST2H3D	histone cluster 2, H3c /// histone cluster 2, H3a /// histone cluster 2, H3d	chr1	0.54	0.00576142
7919642	HIST2H2AB	histone cluster 2, H2ab	chr1	0.52	0.04
8117598	HIST2H4B /// HIST4H4 /// HIST2H4A /// HIST1H4L /// HIST1H4E /// HIST1H4B /// HIST1H4H /// HIST1H4C /// HIST1H4J /// HIST1H4K /// HIST1H4F /// HIST1H4D /// HIST1H4A /// HIST1H4I	histone cluster 2, H4b /// histone cluster 4, H4 /// histone cluster 2, H4a /// histone cluster 1, H4l /// histone cluster 1, H4e /// histone cluster 1, H4b /// histone cluster 1, H4h /// histone cluster 1, H4c /// histone cluster 1, H4j /// histone cluster 1, H4k /// histone cluster 1, H4f /// histone cluster 1, H4d /// histone cluster 1, H4a /// histone cluster 1, H4i	chr6	0.51	0.00520327
7919589	HIST2H3C /// HIST2H3A /// HIST2H3D	histone cluster 2, H3c /// histone cluster 2, H3a /// histone cluster 2, H3d	chr1	0.51	0.00667312
8124524	HIST1H2AK /// HIST1H2AH /// HIST1H2AG /// HIST1H2AM /// HIST1H2AL /// HIST1H2AI	histone cluster 1, H2ak /// histone cluster 1, H2ah /// histone cluster 1, H2ag /// histone cluster 1, H2am /// histone cluster 1, H2al /// histone cluster 1, H2ai	chr6	0.48	0.04
8117429	HIST1H2BI /// HIST1H2BC /// HIST1H2BE /// HIST1H2BF /// HIST1H2BG	histone cluster 1, H2bi /// histone cluster 1, H2bc /// histone cluster 1, H2be /// histone cluster 1, H2bf /// histone cluster 1, H2bg	chr6	0.47	0.00814389
8117535	HIST1H2AG /// HIST1H2AH /// HIST1H2AM /// HIST1H2AL /// HIST1H2AK /// HIST1H2AI	histone cluster 1, H2ag /// histone cluster 1, H2ah /// histone cluster 1, H2am /// histone cluster 1, H2al /// histone cluster 1, H2ak /// histone cluster 1, H2ai	chr6	0.45	0.03
8117580	HIST1H2AI /// HIST1H2AH /// HIST1H2AG /// HIST1H2AM /// HIST1H2AL /// HIST1H2AK	histone cluster 1, H2ai /// histone cluster 1, H2ah /// histone cluster 1, H2ag /// histone cluster 1, H2am /// histone cluster 1, H2al /// histone cluster 1, H2ak	chr6	0.43	0.01
8117543	HIST1H2AH	histone cluster 1, H2ah	chr6	0.4	0.01
8117389	HIST1H2BE /// HIST1H2BC /// HIST1H2BI /// HIST1H2BF /// HIST1H2BG	histone cluster 1, H2be /// histone cluster 1, H2bc /// histone cluster 1, H2bi /// histone cluster 1, H2bf /// histone cluster 1, H2bg	chr6	0.39	0.01
8117608	HIST1H2AL /// HIST1H2AH /// HIST1H2AG /// HIST1H2AM /// HIST1H2AK /// HIST1H2AI	histone cluster 1, H2al /// histone cluster 1, H2ah /// histone cluster 1, H2ag /// histone cluster 1, H2am /// histone cluster 1, H2ak /// histone cluster 1, H2ai	chr6	0.37	0.05
8124402	HIST1H1T	histone cluster 1, H1t	chr6	0.34	0.03
7952179	H2AFX	H2A histone family, member X	chr11	0.3	0.04
