# Supplementary material for: Global DNA Hypomethylation in Epithelial Ovarian Cancer: Passive Demethylation and Association with Genomic Instability
Source: Cancers (Basel). 2020 Mar 24;12(3):764. doi: 10.3390/cancers12030764 (PMC7140107; doi:10.3390/cancers12030764)
Supplement: Supplementary file 1 [file cancers-12-00764-s001.zip › Wa_ Supplementary Table 7 Hypo block comparison GDHO(+) vs. GDHO(-) EOC.xlsx]

## Sheet:  Hypo blocks GDHO+ vs. - 
Zhang et al. Supplementary Table 7. Hypomethylated blocks in GDHO(+) EOC vs. GDHO(−) EOC
Methylation analysis method	Sample Comparison	# of Hypo Blocks	Bases in Hypo Blocks	Average Hypo Block Size	% Genome in Hypo Blocks
Methyl-seq	GDHO(−) EOC vs. NE	1263	141698737	112192	2.33341
Methyl-seq	GDHO(+) EOC vs. NE	2208	880537792	398794	14.5002
