# Supplementary material for: Global DNA Hypomethylation in Epithelial Ovarian Cancer: Passive Demethylation and Association with Genomic Instability
Source: Cancers (Basel). 2020 Mar 24;12(3):764. doi: 10.3390/cancers12030764 (PMC7140107; doi:10.3390/cancers12030764)
Supplement: Supplementary file 1 [file cancers-12-00764-s001.zip › Wa_ Supplementary Table 8 MethylSeq Coverage Data.xlsx]

## Sheet: Methyl-seq coverage
Zhang et al. Supplementary Table 8. Agilent SureSelect Methyl-Seq Genomic Coverage
CpGs with at least 10x sequencing and present in all 6 Methyl-Seq samples
Genomic Region	Number of CpG's	% of Total
Total	2668336	100
Gene Body 1	2016462	75.57
Promoters 2	867245	32.5013
Genes + Promoters	2293727	86
Non-Gene, Non-Promoter	374609	14.039
CpG Islands	956464	35.845
CpG Island Shores 3	879971	32.9783
CpG Island Shelves 4	522447	19.5795
1 Gene Body = transcription start site to transcription end site
2 Promoters = 1.5 kb upstream and 0.5 kb downstream of transcription start sites
3 CpG Island Shores = +/- 2000 bases from CpG Islands
4 CpG Island Shelves = +/- 2000 bases from CpG Island shores
