# Supplementary material for: Global DNA Hypomethylation in Epithelial Ovarian Cancer: Passive Demethylation and Association with Genomic Instability
Source: Cancers (Basel). 2020 Mar 24;12(3):764. doi: 10.3390/cancers12030764 (PMC7140107; doi:10.3390/cancers12030764)
Supplement: Supplementary file 1 [file cancers-12-00764-s001.zip › Wa_ Supplementary Table 9 TF binding sites vs. hypo blocks.xlsx]

## Sheet: TF sites vs. hypoblocks
Zhang et al. SupplementaryTable 9.Transcription factor binding sites vs. EOC hypomethylated blocks.
Transcription Factor	Total Transcription Factors	Transcription Factors inside Hypo Blocks	Enrichment or Change in Numbers of Transcription Factor from Expected	CHI-Square Test pvalue
SUZ12	5772	2497	823.102	5.44536e-126
EZH2	14818	6103	1805.73	2.09204e-234
POU5F1	3997	1448	288.857	7.57391e-24
NANOG	5473	1907	319.813	1.61995e-21
CTBP2	6537	2240	344.249	6.39596e-21
RAD21	119039	38525	4003.31	3.2202e-144
CTCF	162209	52216	5174.87	2.1929e-176
REST	58014	18647	1822.76	1.90879e-62
GATA2	73974	23299	1846.3	1.3385e-50
ZZZ3	852	266	18.9173	0.153215
STAT3	67977	21207	1493.45	1.56624e-36
MAFK	84087	26092	1706.5	1.82958e-38
BCL3	22617	7015	455.998	2.35473e-11
ZNF143	44997	13941	891.727	1.9645e-20
POLR3G	230	71	4.29927	0.53214
GATA3	55528	17078	974.703	7.82143e-20
ESR1	25776	7927	451.878	5.54878e-10
FOS	131528	40402	2258.46	7.31462e-43
USF1	58534	17906	930.953	2.25253e-17
BCL11A	20286	6181	297.995	4.01012e-06
MAFF	47076	14274	621.81	2.68769e-10
IKZF1	7726	2327	86.4354	0.0302251
EP300	138836	41603	1340.12	2.26046e-15
SMC3	56772	17009	544.939	4.64947e-07
ZNF263	27758	8256	206.092	0.0064094
TCF7L2	45100	13366	286.856	0.00291295
TCF12	43585	12917	277.211	0.00343067
MAX	85949	25415	489.516	0.000233473
MYC	96959	28625	506.581	0.000336694
SETDB1	22192	6540	104.249	0.123021
EBF1	48897	14406	225.714	0.02448
NFATC1	10183	2997	43.8975	0.337721
CEBPB	146873	43216	622.362	0.000345121
NR3C1	35176	10342	140.848	0.0979249
SP2	5441	1598	20.0927	0.548306
BACH1	13283	3900	47.8877	0.359832
POLR2A	134990	39585	437.47	0.00868979
ZNF217	9204	2697	27.8107	0.522926
BRF1	291	85	0.609073	0.937283
JUND	97411	28410	160.5	0.257094
JUN	58594	17086	93.5533	0.394363
BATF	32419	9428	26.3867	0.746722
FOXP2	27652	8036	16.8319	0.823482
FOSL2	43464	12516	-88.6985	0.348445
USF2	23709	6813	-62.6856	0.369621
FAM48A	4087	1172	-13.243	0.648019
KAP1	26393	7560	-94.0541	0.202004
BRF2	1367	391	-5.43436	0.746001
SPI1	67572	19316	-280.095	0.0175673
NFE2	3169	904	-15.0201	0.556528
BHLHE40	38801	11040	-212.414	0.0174794
PRDM1	4574	1300	-26.4746	0.388312
STAT1	19147	5437	-115.691	0.0653945
TEAD4	58029	16446	-382.595	0.00046499
IRF4	17722	5021	-118.436	0.0499202
HSF1	1434	405	-10.8646	0.527205
YY1	64138	18087	-513.224	7.96907e-06
TCF3	15917	4487	-128.981	0.024258
PBX3	9927	2794	-84.8616	0.060513
FOXA1	89906	25234	-839.027	6.97364e-10
SMARCC1	7650	2139	-79.5244	0.0450986
RXRA	19229	5375	-201.471	0.00136533
TFAP2C	22481	6255	-264.562	0.000100838
MEF2C	9210	2562	-108.929	0.0123699
GABPA	26985	7481	-344.736	3.74904e-06
SP1	49005	13585	-626.606	4.4322e-10
JUNB	12142	3360	-161.219	0.00126264
TFAP2A	16808	4646	-228.374	0.000103591
HDAC2	31954	8832	-434.762	8.32537e-08
CTCFL	11533	3182	-162.607	0.000847309
ATF2	26026	7180	-367.623	5.1159e-07
ATF3	23095	6368	-329.624	1.75278e-06
EGR1	44985	12366	-679.793	1.62483e-12
RCOR1	49688	13600	-809.678	1.19541e-15
NFIC	38851	10621	-645.914	5.13137e-13
NFYB	17509	4774	-303.666	4.24795e-07
RELA	36928	10040	-669.238	1.65543e-14
PAX5	33070	8986	-604.405	2.39681e-13
ZBTB33	12769	3463	-240.051	2.84635e-06
RUNX3	66222	17934	-1270.59	1.41753e-27
HNF4A	22374	6058	-430.531	2.25149e-10
FOSL1	11937	3226	-235.768	1.97832e-06
MAZ	43914	11863	-872.2	4.62423e-20
FOXM1	21667	5846	-437.499	5.74973e-11
STAT5A	16120	4343	-331.851	8.40543e-09
SMARCC2	2543	683	-54.4781	0.017276
CHD2	33645	9024	-733.157	1.2671e-18
POU2F2	26413	7082	-577.854	4.66104e-15
HNF4G	20339	5450	-448.375	4.24961e-12
MTA3	11136	2981	-248.475	2.11349e-07
ZNF274	1858	496	-42.8259	0.0285571
ESRRA	1174	312	-28.4637	0.0671383
MEF2A	21875	5813	-530.82	2.58637e-15
MBD4	5549	1474	-135.228	6.31734e-05
ELF1	44120	11716	-1078.94	1.04355e-29
FOXA2	40866	10848	-1003.27	7.6503e-28
SMARCA4	3431	908	-87.0009	0.00106305
SIN3AK20	37414	9836	-1014.18	6.96883e-31
RFX5	24892	6532	-686.759	8.57319e-22
CBX3	20197	5299	-558.194	4.8902e-18
E2F6	25551	6696	-713.871	7.41686e-23
TAF1	40355	10564	-1139.08	7.83775e-36
TBP	45699	11962	-1290.86	2.0952e-40
TBL1XR1	22156	5791	-634.311	5.9252e-21
NR2C2	4601	1202	-132.305	1.71939e-05
ZBTB7A	25063	6531	-737.35	1.02104e-24
SIN3A	23062	5999	-689.053	1.5329e-23
SRF	16014	4140	-504.111	1.64885e-18
BDP1	791	203	-26.3925	0.0386344
TAL1	26211	6721	-880.274	4.39057e-33
PPARGC1A	1291	331	-43.3941	0.00777768
ARID3A	24307	6218	-831.107	7.23568e-32
MXI1	36263	9253	-1263.39	2.06614e-48
RBBP5	19205	4880	-689.511	5.63642e-28
STAT2	3936	993	-148.453	1.84101e-07
HDAC8	1607	405	-61.0351	0.000792548
ATF1	14850	3742	-564.547	1.79655e-24
SMARCB1	8485	2138	-322.677	1.16407e-14
ZEB1	4807	1208	-186.045	3.34706e-09
ZKSCAN1	4066	1021	-158.153	4.60487e-08
TRIM28	11915	2991	-464.388	6.87091e-21
MYBL2	16138	4051	-629.071	9.98662e-28
BRCA1	9245	2315	-366.079	4.83722e-17
RPC155	2806	702	-111.749	3.33367e-06
NFYA	7335	1826	-301.173	9.20835e-15
SIRT6	2291	569	-95.3973	1.12148e-05
WRNIP1	13542	3354	-573.223	1.87627e-27
NR2F2	16296	4021	-704.892	4.54999e-34
E2F1	17997	4432	-787.187	2.9898e-38
GTF2F1	14768	3632	-650.767	3.83672e-32
GTF3C2	3812	935	-170.492	1.16107e-09
PML	23278	5691	-1059.69	6.91044e-53
E2F4	18683	4548	-870.13	1.03399e-44
CREB1	15809	3834	-750.66	1.54823e-39
HDAC6	1110	267	-54.9035	0.000281567
CCNT2	18076	4347	-895.098	9.74145e-49
CEBPD	11399	2725	-580.746	4.13892e-33
SIX5	7911	1887	-407.215	6.135e-24
HMGN3	13061	3115	-672.732	1.75196e-38
IRF1	20215	4795	-1067.41	1.73983e-61
GATA1	20310	4807	-1082.96	5.98355e-63
CHD1	16981	3947	-977.544	2.15894e-61
BCLAF1	8943	2076	-517.499	1.72329e-33
UBTF	13613	3155	-792.813	1.07099e-50
ETS1	13737	3170	-813.774	7.49515e-53
NRF1	7864	1766	-514.585	1.91102e-37
TAF7	11580	2599	-759.237	1.62426e-54
SP4	5352	1198	-354.097	1.45533e-26
HDAC1	10390	2305	-708.133	6.54804e-53
ELK1	8455	1873	-578.977	8.81326e-44
SREBP1	2546	550	-188.348	1.93148e-16
THAP1	3469	735	-271.021	3.64185e-24
PHF8	17247	3624	-1377.68	3.00244e-118
ELK4	5860	1230	-469.419	1.29407e-41
KDM5B	12943	2709	-1044.51	4.98834e-91
SAP30	8399	1718	-717.737	9.53478e-67
GTF2B	2844	576	-248.769	8.65387e-25
RDBP	440	89	-38.6014	5.00217e-05
IRF3	1722	338	-161.385	1.02822e-17
GRp20	590	108	-63.1019	1.03344e-08
KDM5A	1580	268	-190.205	5.3334e-26
