# Supplementary material for: Global DNA Hypomethylation in Epithelial Ovarian Cancer: Passive Demethylation and Association with Genomic Instability
Source: Cancers (Basel). 2020 Mar 24;12(3):764. doi: 10.3390/cancers12030764 (PMC7140107; doi:10.3390/cancers12030764)
Supplement: Supplementary file 1 [file cancers-12-00764-s001.zip › Wa_ Supplementary Table 10 Histone Marks vs. hypo blocks.xlsx]

## Sheet: histone markers vs. hypoblock
Zhang et al. Supplementary Table 10. Histone marks vs. hypo blocks.
Histone Modification	Total Peaks	Peaks Inside Hypo Blocks	Enrichment or Change in Numbers of Peaks from Expected	CHI-Square Test pvalue
H3K4Me3 1	33116	8655	-948.64	3.66066e-22
H3K9Me3	49328	18264	3958.88	2.98245e-240
H3K27Me3	40126	15428	3791.46	1.26889e-270
H3K36Me3	33342	6303	-3366.18	7.86168e-257
H3K27Ac	67989	17935	-1781.81	6.76525e-37
1 Histone modifications determined from ENCODE ChIP-seq data of human mammary epithelial cells (HMEC)
