# Supplementary material for: Global DNA Hypomethylation in Epithelial Ovarian Cancer: Passive Demethylation and Association with Genomic Instability
Source: Cancers (Basel). 2020 Mar 24;12(3):764. doi: 10.3390/cancers12030764 (PMC7140107; doi:10.3390/cancers12030764)
Supplement: Supplementary file 1 [file cancers-12-00764-s001.zip › Wa_ Supplementary Table 11 RE expression vs. methylation.xlsx]

## Sheet: RE expression and methylation
Zhang et al. Supplementary Table 11. RE expression and methylation in EOC.
Repeat Family	Average Repeat Percent Methylation Change from EOC83 (GDHO-) to EOC91 (GDHO+)	Average Repeat Expression (Log2 ratio)Change from EOC83 (GDHO-) to EOC91 (GDHO+)	Increased Expression and Decreased Methylation	Decreased Expression and Decreased Methylation	Increased Expression and Increased Methylation	Increased Expression and Decreased Methylation
Simple_repeat/(TTAG)n	0	0.98	X
LTR/ERVK/LTR5	0	1.04	X
LTR/ERVL/MER74A	-7.2	0.00229188	X
SINE/Alu/AluSz	-6.49	0.00404792	X
DNA?/DNA?/UCON23	-19.59	0.00836388	X
LINE/L1/L1MB5	-12.01	0.01	X
LTR/ERV1/LTR6B	-25.21	0.01	X
LTR/ERV1/MER34D	-20.5	0.01	X
LTR/Gypsy/MamGypLTR1d	-5.35	0.01	X
SINE/Alu/AluSg4	-4.84	0.01	X
SINE/Alu/AluYk4	-9.17	0.01	X
DNA/hAT-Tip100/Zaphod2	-6.18	0.02	X
LTR/ERVL/LTR82A	-17.36	0.02	X
LTR/ERVL/MER77	-9.44	0.02	X
SINE/Alu/AluSq2	-5.91	0.02	X
SINE/Alu/AluSx1	-7.48	0.02	X
DNA/DNA/MER105	-7.29	0.03	X
LINE/L1/L1M1	-6.16	0.03	X
LINE/L1/L1PB	-0.32	0.03	X
LTR/ERV1/MER4E1	-16.79	0.03	X
LTR/ERV1/MER51A	-7.65	0.03	X
LTR/ERV1/MER90a	-9.92	0.03	X
LTR/ERVL/LTR18B	-8.82	0.03	X
LTR/ERVL/LTR50	-4.95	0.03	X
SINE/Alu/AluSc5	-7.4	0.03	X
SINE/Alu/AluSg	-6.98	0.03	X
SINE/Alu/AluSp	-5.08	0.03	X
SINE/Alu/AluSz6	-5.69	0.03	X
LTR/ERV1/LTR39	-18.66	0.04	X
LTR/ERV1/LTR51	-16.05	0.04	X
LTR/ERV1/LTR64	-15.42	0.04	X
LTR/ERV1/MER4D1	-14.11	0.04	X
LTR/ERV1/MER57D	-16.07	0.04	X
LTR/ERVL-MaLR/MSTD-int	-12.95	0.04	X
SINE/Alu/AluSq	-7.16	0.04	X
DNA/TcMar-Tc2/Kanga1a	-10.18	0.05	X
LINE/L1/L1P2	-7.73	0.05	X
LINE/L1/L1PB3	-1.12	0.05	X
LTR/ERV1/LTR12	-2.76	0.05	X
LTR/ERV1/MER50-int	-17.46	0.05	X
LTR/ERV1/MER57-int	-21.53	0.05	X
LTR/ERVL/MER76-int	-3.94	0.05	X
LTR/Gypsy?/LTR88c	-7.33	0.05	X
SINE/Alu/FLAM_C	-5.44	0.05	X
DNA/DNA/MER135	-20.07	0.06	X
DNA/TcMar-Tc2/Kanga1b	-9.32	0.06	X
LINE/L1/L1MB4	-13.56	0.06	X
LINE/L1/L1MD1	-8.63	0.06	X
LINE/L1/L1PA8A	-14.25	0.06	X
LTR/ERV1/LTR10C	-2.15	0.06	X
LTR/ERV1/MER31B	-14.17	0.06	X
LTR/ERVL/LTR16A2	-0.43	0.06	X
LTR/ERVL-MaLR/MLT1F1-int	-12.8	0.06	X
Simple_repeat/(CA)n	-7.82	0.06	X
SINE/Alu/AluSx3	-5.64	0.06	X
SINE/Alu/AluSx4	-8.01	0.06	X
DNA/hAT-Charlie/MER113B	-7.74	0.07	X
LINE/L1/L1M3c	-4.7	0.07	X
LINE/L1/L1MCa	-18.11	0.07	X
LINE/L1/L1PA15-16	-12.82	0.07	X
LTR/ERV1/HERVIP10F-int	-3.4	0.07	X
LTR/ERV1/LTR24C	-7.43	0.07	X
LTR/ERV1/LTR43	-6.94	0.07	X
LTR/ERV1/LTR68	-27.3	0.07	X
LTR/ERV1/MER41B	-3.78	0.07	X
LTR/ERVL/LTR86B2	-0.15	0.07	X
LTR/ERVL-MaLR/MLT1F2-int	-5.51	0.07	X
SINE/Alu/AluYc3	-9.42	0.07	X
Unknown/Unknown/UCON28a	-25.18	0.07	X
DNA/TcMar-Tigger/MER44C	-7.01	0.08	X
LINE/L1/L1M4c	-3.68	0.08	X
LTR/ERV1/LTR8	-8.77	0.08	X
LTR/ERVK/LTR13	-9.64	0.08	X
LTR/ERVL-MaLR/MSTC	-3.95	0.08	X
DNA/hAT-Charlie/Cheshire	-5.42	0.09	X
DNA/TcMar-Tc2/Kanga1	-18.17	0.09	X
LINE/L1/L1MB3	-14.09	0.09	X
LINE/L1/L1MEg	-7.27	0.09	X
LINE/L1/L1PBa	-2.3	0.09	X
LTR/ERV1/LTR12C	-5.2	0.09	X
LTR/ERV1/LTR28	-12.03	0.09	X
LTR/ERV1/MER34A1	-18.75	0.09	X
LTR/ERVL/LTR86B1	-2.18	0.09	X
LTR/Gypsy/MamGypLTR1c	-9.78	0.09	X
Unknown/Unknown/UCON31	-0.59	0.09	X
LTR/ERV1/LTR56	-18.31	0.1	X
LTR/ERV1/MER50	-21.49	0.1	X
LTR/ERVL/LTR33A_	-7.02	0.1	X
LTR/ERVL-MaLR/MLT1G1	-7.65	0.1	X
SINE/Alu/AluSc	-7.43	0.1	X
SINE/Alu/AluY	-8.86	0.1	X
DNA/TcMar-Tigger/MER82	-14.16	0.11	X
DNA/TcMar-Tigger/Tigger1a_Art	-3.77	0.11	X
LINE/L1/L1MA4A	-12.14	0.11	X
LTR/ERV1/LTR1	-13.39	0.11	X
LTR/ERV1/LTR49	-4.06	0.11	X
LTR/ERV1/MER65A	-9.61	0.11	X
LTR/ERV1/MER72	-11.66	0.11	X
LTR/ERV1/MER84	-12.57	0.11	X
LTR/ERVL-MaLR/MLT1E1A	-5.98	0.11	X
Satellite/centr/SST1	-8.74	0.11	X
SINE/Alu/AluSg7	-6.85	0.11	X
DNA/hAT?/MER99	-1.27	0.12	X
DNA/hAT-Tip100/ORSL-2b	-11.08	0.12	X
DNA/TcMar-Tigger/Tigger2b_Pri	-10.91	0.12	X
LINE/L1/L1MC	-10.67	0.12	X
LINE/L1/L1MD	-8.07	0.12	X
LINE/L1/L1MEb	-3.92	0.12	X
LTR/ERV1/LTR15	-21.68	0.12	X
LTR/ERV1/LTR25-int	-4.37	0.12	X
LTR/ERV1/MER34C2	-19.29	0.12	X
LTR/ERVL/LTR16A1	-2.97	0.12	X
LTR/ERVL/LTR57-int	-13.12	0.12	X
LTR/ERVL/LTR84b	-7.8	0.12	X
LTR/ERVL-MaLR/MLT1F	-6.84	0.12	X
LTR/ERVL-MaLR/MLT1K	-8.39	0.12	X
DNA?/DNA?/MER134	-16.84	0.13	X
DNA?/DNA?/UCON7	-72	0.13	X
LINE/L1/L1MD3	-9.8	0.13	X
LTR/ERV1/HERV17-int	-24.9	0.13	X
LTR/ERV1/LTR9	-15.51	0.13	X
LTR/ERV1/MER4A1	-20	0.13	X
LTR/ERV1/MER52C	-8.23	0.13	X
LTR/ERV1/MER61F	-16.59	0.13	X
LTR/ERVK/LTR22B	-19.6	0.13	X
LTR/ERVL/LTR32	-12.47	0.13	X
LTR/ERVL/LTR33A	-10.93	0.13	X
LTR/ERVL-MaLR/MLT1C	-12.49	0.13	X
LTR/ERVL-MaLR/MLT1G	-5.02	0.13	X
LTR/Gypsy/LTR81C	-10.18	0.13	X
SINE/Alu/AluJb	-7.66	0.13	X
LTR/ERV1/MER65D	-11.01	0.14	X
LTR/ERVL/LTR75	-1.89	0.14	X
LTR/ERVL-MaLR/MLT1G3	-9.28	0.14	X
DNA/hAT-Blackjack/MER63D	-8.56	0.15	X
DNA/hAT-Tip100/MER45C	-3.27	0.15	X
DNA/TcMar-Tigger/MER47A	-8.99	0.15	X
LTR/ERV1/LTR19A	-6.5	0.15	X
LTR/ERV1/MER49	-17.55	0.15	X
LTR/ERV1/MER57B2	-11.5	0.15	X
LTR/ERV1/MER61E	-1.62	0.15	X
LTR/ERVK/MER11C	-8.73	0.15	X
LTR/ERVL-MaLR/MLT1E2	-8.2	0.15	X
Simple_repeat/(CCCA)n	-7.46	0.15	X
Simple_repeat/(CGAGG)n	-1.6	0.15	X
DNA/TcMar-Tigger/MER44D	-5.3	0.16	X
LINE/L1/L1MB7	-12.08	0.16	X
LINE/L1/L1MC1	-8.06	0.16	X
LTR/ERV1/LTR1D	-13.48	0.16	X
LTR/ERV1/LTR45B	-6.4	0.16	X
LTR/ERV1/MER4A1_	-3.94	0.16	X
LTR/ERVL/MER21C	-7.63	0.16	X
LTR/ERVL/MER77B	-14.77	0.16	X
SINE/Alu/AluSc8	-4.97	0.16	X
DNA/hAT-Charlie/Charlie5	-8.94	0.17	X
LINE/L1/L1MB8	-11.01	0.17	X
LINE/L1/L1PA10	-15.38	0.17	X
LTR/ERV1/HUERS-P1-int	-3.41	0.17	X
LTR/ERV1/LTR8A	-16.67	0.17	X
LTR/ERV1/MER4B	-9.1	0.17	X
LTR/ERV1/MER57B1	-22.49	0.17	X
LTR/ERV1/MER57E2	-1.87	0.17	X
LTR/ERVL/ERVL-E-int	-7.34	0.17	X
LTR/ERVL/LTR41	-2.46	0.17	X
LTR/ERVL/MER70-int	-18.23	0.17	X
LINE/L1/L1M3	-5.09	0.18	X
LINE/L1/L1MB2	-10.16	0.18	X
LINE/L1/L1MEc	-10.78	0.18	X
LINE/L1/L1PA4	-17.23	0.18	X
LTR/ERV1/MER31A	-7.19	0.18	X
LTR/ERVL-MaLR/MLT1E1	-7.33	0.18	X
LTR/ERVL-MaLR/MLT1H1	-11.75	0.18	X
LTR/ERVL-MaLR/THE1A-int	-3.72	0.18	X
SINE/Alu/AluJr	-7.83	0.18	X
SINE/Alu/AluJr4	-8.71	0.18	X
SINE/Alu/FAM	-2.22	0.18	X
DNA/hAT-Charlie/MER102b	-6.79	0.19	X
DNA/hAT-Charlie/MER106A	-10.17	0.19	X
DNA/hAT-Charlie/MER106B	-9.24	0.19	X
DNA/hAT-Tip100/Arthur1B	-12.18	0.19	X
DNA/TcMar-Mariner/HSMAR2	-14.78	0.19	X
LINE/L1/L1M2b	-21.89	0.19	X
LINE/L1/L1MC4	-12.02	0.19	X
LINE/L1/L1MEg2	-5.18	0.19	X
LINE/L1/L1PA5	-12.51	0.19	X
LINE/L1/L1PA7	-13.87	0.19	X
LTR/ERVK/MER11B	-0.49	0.19	X
LTR/ERVL/ERVL-B4-int	-6.61	0.19	X
LTR/ERVL/LTR16C	-11.14	0.19	X
LTR/ERVL/MER21B	-6.66	0.19	X
LTR/ERVL-MaLR/MLT1D	-10.74	0.19	X
DNA/hAT-Blackjack/BLACKJACK	-24.32	0.2	X
DNA/TcMar-Tigger/Tigger2	-1.96	0.2	X
LINE/L1/L1MD2	-9.83	0.2	X
LINE/L1/L1MEa	-19.53	0.2	X
LTR/ERV1/LTR30	-16.86	0.2	X
LTR/ERV1/LTR48	-12.23	0.2	X
LTR/ERV1/LTR70	-7.32	0.2	X
LTR/ERV1/MER57A-int	-11.46	0.2	X
LTR/ERV1/PABL_B	-7	0.2	X
LTR/ERVL/LTR52	-6.35	0.2	X
LTR/ERVL/MER68B	-6.24	0.2	X
LTR/ERVL-MaLR/MLT1A	-8.6	0.2	X
LTR/ERVL-MaLR/MLT1A1	-0.75	0.2	X
Unknown?/Unknown?/MER130	-11.57	0.2	X
DNA/hAT-Charlie/Charlie25	-13.12	0.21	X
DNA/hAT-Charlie/Charlie7a	-6.21	0.21	X
DNA/MuDR/Ricksha_c	-14.66	0.21	X
LINE/L1/L1MA4	-7.69	0.21	X
LINE/L1/L1ME2	-9.23	0.21	X
LINE/L1/L1ME3	-14.24	0.21	X
LINE/L1/L1P4a	-15.2	0.21	X
LTR/ERVK/LTR22C	-13.28	0.21	X
LTR/ERVL-MaLR/MSTB	-13.28	0.21	X
LTR/ERVL-MaLR/MSTB2	-4.6	0.21	X
LTR/LTR/MamRep1527	-18.06	0.21	X
SINE/Alu/AluJo	-6.11	0.21	X
SINE/Alu/AluYb8	-10.87	0.21	X
DNA/TcMar-Tigger/MER6A	-12.68	0.22	X
DNA/TcMar-Tigger/Tigger7	-7.44	0.22	X
LINE/L1/HAL1	-9.49	0.22	X
LINE/L1/L1ME3A	-8.77	0.22	X
LINE/L1/L1ME5	-9.48	0.22	X
LTR/ERV1/LTR37A	-7.74	0.22	X
LTR/ERVL/LTR16A	-8.28	0.22	X
LTR/ERVL-MaLR/MLT1H	-8.96	0.22	X
Simple_repeat/(TGGA)n	-5.3	0.22	X
SINE/Alu/AluSq4	-7.45	0.22	X
DNA/hAT-Charlie/MER119	-9.4	0.23	X
DNA/TcMar-Tigger/MER127	-1.02	0.23	X
LINE/L1/L1M4	-8.04	0.23	X
LINE/L1/L1MC3	-11.93	0.23	X
LINE/L1/L1MDb	-2.45	0.23	X
LINE/L1/L1PA15	-6.85	0.23	X
LTR/ERV1/LTR10D	-9.87	0.23	X
LTR/ERVK/HERVK14-int	-35.61	0.23	X
LTR/ERVL/MLT2F	-8.4	0.23	X
LTR/ERVL-MaLR/MLT1F2	-8.96	0.23	X
DNA/hAT-Charlie/Charlie3	-12.07	0.24	X
DNA/TcMar-Tigger/MER6	-3.94	0.24	X
DNA/TcMar-Tigger/Tigger12c	-10.43	0.24	X
DNA/TcMar-Tigger/Tigger2a	-3.56	0.24	X
LTR/ERV1/LTR37B	-12.08	0.24	X
LTR/ERV1/LTR48B	-7.96	0.24	X
LTR/ERV1/MER90	-5.06	0.24	X
LTR/ERV1/PRIMA4_LTR	-17.47	0.24	X
LTR/ERVK/HERVK22-int	-15.38	0.24	X
LTR/ERVL/LTR16B2	-14.38	0.24	X
LTR/ERVL/MER76	-12.71	0.24	X
DNA/hAT-Charlie/MER1B	-8.78	0.25	X
DNA/TcMar/MamRep1161	-9.65	0.25	X
LINE/L1/L1M4b	-4.75	0.25	X
LINE/L1/L1MDa	-13.53	0.25	X
LTR/ERV1/MER34B	-16.65	0.25	X
LTR/ERV1/MER34C_	-14.57	0.25	X
LTR/ERV1/MER48	-1.02	0.25	X
LTR/ERV1/MER4-int	-5.15	0.25	X
LTR/ERVL/LTR33	-11.22	0.25	X
LTR/ERVL/LTR47B	-9.74	0.25	X
LTR/ERVL/LTR79	-7.83	0.25	X
LTR/ERVL/MLT2B1	-11.15	0.25	X
LTR/ERVL-MaLR/MLT1B	-10.76	0.25	X
LTR/ERVL-MaLR/MLT1J	-6.97	0.25	X
LTR/Gypsy?/LTR88a	-3.99	0.25	X
DNA/hAT-Charlie/MER102c	-5.62	0.26	X
DNA/hAT-Charlie/MER112	-4.43	0.26	X
DNA/hAT-Charlie/MER113	-6.9	0.26	X
DNA/TcMar-Tigger/Tigger6a	-6.64	0.26	X
LINE/L1/L1ME1	-10.43	0.26	X
LINE/L1/L1ME3F	-7.78	0.26	X
LINE/L1/L1PA13	-5.42	0.26	X
LTR/ERV1/LTR12F	-15.36	0.26	X
LTR/ERV1/MER67C	-14.93	0.26	X
LTR/ERVL/LTR16B1	-11.79	0.26	X
LTR/ERVL/MER68	-7.51	0.26	X
LTR/ERVL-MaLR/MLT1A0-int	-12.31	0.26	X
DNA/hAT-Charlie/Charlie2a	-7.22	0.27	X
DNA/hAT-Charlie/Charlie4a	-5.66	0.27	X
DNA/hAT-Charlie/MER1A	-9.54	0.27	X
DNA/TcMar-Tigger/MER47B	-16.3	0.27	X
DNA/TcMar-Tigger/Tigger1	-11.46	0.27	X
DNA/TcMar-Tigger/Tigger3b	-6.89	0.27	X
LINE/L1/L1MC2	-18.74	0.27	X
LINE/L1/L1MEf	-13.17	0.27	X
LTR/ERV1/LTR54B	-6	0.27	X
LTR/ERVL/LTR67B	-8.56	0.27	X
DNA/hAT-Charlie/Charlie10a	-17.09	0.28	X
DNA/MuDR/Ricksha_0	-16.46	0.28	X
DNA/TcMar-Tigger/MER44A	-3.2	0.28	X
DNA/TcMar-Tigger/MER46C	-11.29	0.28	X
LINE/L1/L1M6	-11.64	0.28	X
LINE/L1/L1PA3	-3.9	0.28	X
LTR/ERV1/LTR38B	-8.49	0.28	X
LTR/ERV1/LTR71B	-14.38	0.28	X
LTR/ERV1/MER101-int	-5.72	0.28	X
LTR/ERVK/HERVK11-int	-2.05	0.28	X
LTR/ERVL/LTR86A2	-18.55	0.28	X
LTR/ERVL-MaLR/MLT1F1	-9.9	0.28	X
LTR/ERVL-MaLR/MSTA	-2.26	0.28	X
LTR/ERVL-MaLR/MSTB1-int	-7.29	0.28	X
LTR/ERVL-MaLR/THE1B-int	-13.59	0.28	X
LINE/L1/L1MA2	-8.13	0.29	X
LINE/L1/L1ME3B	-10.13	0.29	X
LINE/L2/L2b	-5.98	0.29	X
LTR/ERV1/MER34A	-17.68	0.29	X
LTR/ERVK/MER11D	-11.16	0.29	X
LTR/ERVL/LTR40b	-4.04	0.29	X
LTR/ERVL/MLT2B2	-7.93	0.29	X
Satellite/centr/GSATII	-7.48	0.29	X
DNA/hAT-Charlie/Charlie1a	-7	0.3	X
LINE/L1/L1MC4a	-8.77	0.3	X
LINE/L1/L1MEd	-9.1	0.3	X
LINE/L1/L1PA16	-3.02	0.3	X
LINE/L1/L1PREC2	-11.45	0.3	X
LTR/ERV1/LTR9B	-5.27	0.3	X
LTR/ERVL-MaLR/MLT1I	-9.86	0.3	X
LTR/ERVL-MaLR/MSTB1	-12.31	0.3	X
DNA/hAT-Charlie/MER20	-6.24	0.31	X
DNA/TcMar-Tigger/Tigger3a	-7.26	0.31	X
DNA/TcMar-Tigger/Tigger9a	-1.67	0.31	X
LINE/L1/L1M3f	-4.25	0.31	X
LINE/L1/L1M7	-11.14	0.31	X
LINE/L1/L1P4	-24.24	0.31	X
LTR/ERV1/LTR21A	-10.28	0.31	X
LTR/ERV1/LTR78	-8.99	0.31	X
LTR/ERV1/MER4D0	-7.08	0.31	X
LTR/ERVK/LTR3	-19.92	0.31	X
LTR/ERVL/LTR16E1	-11.22	0.31	X
LTR/ERVL-MaLR/MLT1A0	-8.47	0.31	X
LTR/ERVL-MaLR/MLT1E2-int	-8.73	0.31	X
LTR/ERVL-MaLR/MLT1L	-8.15	0.31	X
LTR/ERVL-MaLR/THE1C-int	-18.63	0.31	X
Other/Other/SVA_E	-15.38	0.31	X
DNA/hAT-Charlie/Charlie13a	-7.89	0.32	X
LINE/L1/L1MA5A	-15.69	0.32	X
LINE/L1/L1ME3C	-8.88	0.32	X
LINE/L1/L1PA8	-13.33	0.32	X
LTR/ERV1/HUERS-P2-int	-11.87	0.32	X
LTR/ERV1/LTR10G	-7.92	0.32	X
LTR/ERV1/LTR17	-1.21	0.32	X
LTR/ERV1/LTR26E	-9.72	0.32	X
LTR/ERV1/MER41E	-12.59	0.32	X
LTR/ERV1/MER61A	-0.87	0.32	X
LTR/ERV1/MER65-int	-26.94	0.32	X
LTR/ERV1/PABL_A-int	-4.39	0.32	X
LTR/ERVL/LTR41B	-4.81	0.32	X
LTR/ERVL/LTR53	-13.61	0.32	X
LTR/ERVL/MER68-int	-8.46	0.32	X
SINE/Alu/AluYk11	-11.12	0.32	X
DNA/hAT-Tip100/MER115	-7.48	0.33	X
LTR/ERV1/LTR12B	-10.74	0.33	X
LTR/ERV1/MER66B	-11.25	0.33	X
LTR/Gypsy/MamGypLTR2b	-5.74	0.33	X
Other/Other/SVA_C	-3.31	0.33	X
DNA/hAT-Charlie/Charlie17a	-5.86	0.34	X
DNA/hAT-Charlie/MER20B	-8.29	0.34	X
LINE/L1/L1ME4a	-9.51	0.34	X
LINE/L2/L2	-7.14	0.34	X
LTR/ERVL/MLT2D	-11.33	0.34	X
Simple_repeat/(TCCA)n	-5.84	0.34	X
Simple_repeat/(TCTG)n	-1.58	0.34	X
DNA/hAT-Charlie/MER58B	-9.1	0.35	X
DNA/TcMar-Tigger/Tigger4b	-2.58	0.35	X
LINE/L1/L1M5	-8.89	0.35	X
LINE/L1/L1ME3D	-8.98	0.35	X
LINE/L1/L1PB1	-10.31	0.35	X
LINE/L1/L1PB4	-13.46	0.35	X
LTR/ERV1/HERVIP10FH-int	-7.79	0.35	X
LTR/ERVL/LTR80A	-16.11	0.35	X
DNA/TcMar-Mariner/HSMAR1	-15.02	0.36	X
DNA/TcMar-Tigger/Tigger3c	-8.43	0.36	X
LINE/L1/L1MC5	-5.81	0.36	X
LINE/L1/L1P1	-8.81	0.36	X
LTR/ERV1/MER41A	-10.1	0.36	X
LTR/ERV1/MER61C	-8.55	0.36	X
LTR/ERVL/MLT2A1	-7.1	0.36	X
LTR/ERVL-MaLR/MLT1G1-int	-14.48	0.36	X
LTR/ERVL-MaLR/MLT1J2	-5.84	0.36	X
DNA/hAT-Charlie/MER58A	-8.69	0.37	X
DNA/TcMar-Tigger/Tigger10	-4.33	0.37	X
LINE/L1/L1ME2z	-8.78	0.37	X
LTR/ERV1/HERV1_LTRe	-20.26	0.37	X
LTR/ERV1/LTR45C	-12.22	0.37	X
LTR/ERV1/MER52D	-10.76	0.37	X
LTR/ERV1/MER65B	-28.77	0.37	X
LTR/ERV1/MER89	-7.55	0.37	X
DNA/hAT-Charlie/MER113A	-5.44	0.38	X
DNA/TcMar?/MamRep137	-9.13	0.38	X
DNA/TcMar-Tc2/Kanga1d	-8.09	0.38	X
LINE/L1/L1P3	-16.79	0.38	X
LTR/ERV1/MER57C1	-35.66	0.38	X
DNA/TcMar-Tigger/MER6B	-2.02	0.39	X
LINE/L1/L1MA5	-4.98	0.39	X
LINE/L1/L1MEe	-11.76	0.39	X
LTR/ERV1/HERV9-int	-1.34	0.39	X
LINE/L2/L2a	-7.64	0.4	X
LTR/ERV1/MER4C	-13.63	0.4	X
LTR/ERVL/HERVL18-int	-9.07	0.4	X
DNA/hAT-Charlie/Charlie8	-12.8	0.41	X
DNA/TcMar-Tc2/Kanga11a	-15.2	0.41	X
LINE/L2/L2c	-6.72	0.41	X
LTR/ERV1/LOR1a	-5.66	0.41	X
LTR/ERV1/MER39	-8.75	0.41	X
LTR/ERVK/LTR22A	-11.45	0.41	X
LTR/ERVL/MER70A	-13.41	0.41	X
LTR/ERVL/MER74B	-9.32	0.41	X
Other/Other/SVA_B	-1.9	0.41	X
LINE/CR1/L3	-8.14	0.42	X
LINE/L1/L1MA8	-12.84	0.42	X
LINE/L1/L1MCc	-10.06	0.42	X
LINE/L1/L1PBa1	-5.67	0.42	X
LTR/ERV1/HERV1_LTRb	-35.45	0.42	X
LTR/ERVL/LTR84a	-14.91	0.42	X
LTR/ERVL-MaLR/MSTD	-14.6	0.42	X
Unknown/Unknown/UCON28c	-14	0.42	X
DNA/hAT-Charlie/Charlie26a	-15.52	0.43	X
DNA/hAT-Charlie/MER102a	-10.36	0.43	X
LINE/L1/L1MA3	-2.3	0.43	X
LINE/L1/L1MA9	-8.61	0.43	X
LINE/L1/L1MB1	-14.18	0.43	X
LINE/L1/L1PA11	-4.72	0.43	X
LTR/ERV1/MER87B	-3.37	0.43	X
LTR/ERVL/ERV3-16A3_I-int	-8.82	0.43	X
SINE/MIR/MIR	-7.76	0.43	X
DNA/hAT-Charlie/MER33	-8.66	0.44	X
DNA/hAT-Tip100/Arthur1	-12.02	0.44	X
DNA/TcMar-Tigger/Tigger8	-3.22	0.44	X
LTR/ERV1/LTR76	-6.07	0.44	X
LTR/ERV1/MER83B	-14.31	0.44	X
LTR/ERVL/LTR82B	-15.21	0.44	X
LTR/ERVL-MaLR/THE1A	-9.92	0.44	X
LTR/ERVL-MaLR/THE1B	-7.71	0.44	X
LTR/ERVL-MaLR/THE1D	-3.5	0.44	X
DNA/hAT/MamRep488	-3.57	0.45	X
LTR/ERV1/LTR43B	-8.06	0.45	X
LTR/ERV1/MER51C	-15.47	0.45	X
LTR/ERVL/LTR40a	-13.14	0.45	X
LTR/ERVL-MaLR/MLT1H2	-4.2	0.45	X
LTR/ERVL-MaLR/MLT1J-int	-6.92	0.45	X
LTR/Gypsy/LTR81B	-17.73	0.45	X
RC/Helitron/Helitron1Nb_Mam	-12.72	0.45	X
SINE/MIR/MIRb	-7.1	0.45	X
Unknown/Unknown/MamRep605	-8.43	0.45	X
DNA/TcMar-Tigger/Tigger12A	-13.3	0.46	X
LINE/L1/L1P4e	-11.79	0.46	X
LTR/ERVL/HERVL74-int	-0.25	0.46	X
LTR/ERVL/LTR40c	-5.59	0.46	X
LTR/ERVL-MaLR/MLT1A1-int	-1.73	0.46	X
DNA/hAT-Tip100/Zaphod	-21.88	0.47	X
LTR/ERVL-MaLR/MLT1E3	-10.53	0.47	X
DNA/hAT-Blackjack/MER63C	-23.41	0.48	X
DNA/TcMar-Tc2/Kanga2_a	-7.05	0.48	X
DNA/TcMar-Tigger/MER8	-7.25	0.48	X
LTR/ERV1/MER61-int	-1.81	0.48	X
LTR/ERVL/LTR16B	-17.33	0.48	X
LTR/ERVL-MaLR/MLT1L-int	-7.89	0.48	X
LTR/Gypsy/MamGypLTR1b	-5.11	0.48	X
DNA/hAT/MamRep38	-9.23	0.49	X
DNA/hAT?/MamRep1879	-4.8	0.49	X
DNA/hAT-Charlie/Charlie13b	-3.63	0.49	X
DNA/hAT-Charlie/Charlie6	-0.43	0.49	X
DNA/hAT-Charlie/MER5A1	-7.49	0.49	X
DNA/TcMar-Mariner/MARNA	-13.73	0.49	X
DNA/TcMar-Tigger/MamRep434	-11.26	0.49	X
DNA/TcMar-Tigger/Tigger9b	-15.05	0.49	X
LTR/ERV1/LOR1b	-6.4	0.49	X
LTR/ERV1/LTR49-int	-0.73	0.49	X
LTR/ERV1/LTR77	-0.48	0.49	X
LTR/ERV1/MER110	-15.19	0.49	X
LTR/ERVK/MER9a2	-33.47	0.49	X
Simple_repeat/(CACAA)n	-16.73	0.49	X
DNA/hAT-Charlie/Charlie1	-6.34	0.5	X
DNA/hAT-Charlie/Charlie1b	-7.92	0.5	X
DNA/hAT-Charlie/Charlie23a	-10.84	0.5	X
DNA/hAT-Tip100/MER45B	-10.84	0.5	X
DNA/TcMar-Tigger/Tigger13a	-10.45	0.5	X
DNA/TcMar-Tigger/Tigger15a	-5.93	0.5	X
DNA/TcMar-Tigger/Tigger4	-6.09	0.5	X
LINE/L1/L1MCb	-6.44	0.5	X
LTR/ERV1/LTR65	-6.41	0.5	X
LTR/ERV1/MER34	-9.67	0.5	X
LTR/ERVL/HERVL-int	-3.43	0.5	X
Other/Other/SVA_D	-28.31	0.5	X
DNA/hAT-Charlie/Charlie19a	-11.73	0.51	X
DNA/TcMar-Tigger/MER2	-4.72	0.51	X
LINE/L1/L1PA2	-26.39	0.51	X
LTR/ERV1/LTR38C	-21.55	0.51	X
LTR/ERVK/HERVK14C-int	-14.97	0.51	X
LTR/ERVL-MaLR/MLT1D-int	-3.11	0.51	X
LINE/L1/L1ME3E	-11.52	0.52	X
LTR/ERV1/LTR35	-17.94	0.52	X
LTR/ERVK/LTR14B	-25.59	0.52	X
LTR/ERVL-MaLR/MLT1F-int	-13.06	0.52	X
Simple_repeat/(TATG)n	-9.16	0.52	X
DNA/hAT-Charlie/Charlie11	-3.77	0.53	X
LINE/L1/L1MA7	-18.09	0.53	X
LTR/ERV1/MER31-int	-11.63	0.53	X
LTR/ERVL/LTR33B	-8.7	0.53	X
DNA/hAT-Charlie/MER5C	-10.03	0.54	X
LTR/ERV1/LTR78B	-8.67	0.54	X
LTR/ERVL-MaLR/THE1C	-4.83	0.54	X
SINE/MIR/MIRc	-6.52	0.54	X
DNA/hAT-Charlie/MER5A	-9.56	0.55	X
DNA/TcMar-Tigger/MER2B	-9.41	0.55	X
LINE/RTE/L4	-10.59	0.55	X
LTR/ERV1/HERVP71A-int	-13.18	0.55	X
LTR/ERV1/MER52-int	-0.34	0.55	X
LTR/ERVL-MaLR/MLT1J1	-14.65	0.55	X
LTR/ERVL-MaLR/MSTB-int	-10.15	0.55	X
RC/Helitron/Helitron3Na_Mam	-11.72	0.55	X
Simple_repeat/(TTGTG)n	-3.86	0.55	X
DNA/hAT-Blackjack/MER63A	-11.42	0.56	X
DNA/hAT-Charlie/MER58C	-12.35	0.56	X
LINE/L1/L1MA6	-8.07	0.56	X
LTR/ERV1/LTR24B	-4.45	0.56	X
LTR/ERV1/MER110-int	-5.24	0.56	X
LTR/ERVL/LTR16D	-2.55	0.56	X
LTR/Gypsy/MamGypLTR1a	-12.92	0.56	X
DNA/hAT-Charlie/Charlie2b	-10.76	0.57	X
DNA/TcMar-Tigger/MER44B	-6.11	0.57	X
DNA/TcMar-Tigger/Tigger5	-8.08	0.57	X
LTR/ERV1/LTR19B	-2.64	0.57	X
LTR/ERVL/LTR47A	-18.65	0.57	X
LTR/ERVL-MaLR/MLT1B-int	-4.75	0.57	X
LTR/ERVL-MaLR/MLT1E	-17.82	0.57	X
Other/Other/SVA_A	-4.7	0.57	X
Simple_repeat/(CACCAT)n	-1.08	0.57	X
LTR/ERVL/MER54B	-5.92	0.58	X
LTR/Gypsy/MamGypLTR3	-5.38	0.58	X
LTR/Gypsy?/LTR85b	-14.54	0.58	X
SINE/Alu/AluYa8	-10.7	0.58	X
DNA/hAT-Charlie/MER3	-6.57	0.59	X
LTR/ERV1/MER67D	-7.74	0.59	X
LTR/ERVL/MLT2C1	-4.34	0.59	X
Simple_repeat/(CAA)n	-2.18	0.59	X
DNA/hAT/MamRep1894	-17.01	0.6	X
DNA/TcMar-Tc2/MER104	-6.29	0.6	X
LINE/L1/L1M3a	-16.06	0.6	X
LINE/L1/L1P5	-5.27	0.6	X
LTR/ERV1/MER57E1	-3.31	0.6	X
LTR/ERVL/LTR40A1	-3.55	0.6	X
DNA/hAT-Charlie/Charlie4z	-6.51	0.61	X
DNA/TcMar-Tigger/Tigger12	-5.77	0.61	X
LTR/ERV1/MER92B	-13.71	0.61	X
Other/Other/SVA_F	-14.06	0.61	X
DNA/hAT-Charlie/Charlie15a	-6.76	0.62	X
DNA/hAT-Charlie/MER30	-8.26	0.62	X
LTR/ERV1/MER67A	-3.45	0.62	X
LTR/ERVL/ERVL-int	-13.03	0.62	X
LTR/ERVL?/LTR89	-6.58	0.62	X
LTR/ERVL-MaLR/MLT1G-int	-14.92	0.62	X
LTR/ERVL-MaLR/MLT1H-int	-5.43	0.62	X
SINE/Alu/AluYc	-11.99	0.62	X
DNA/hAT-Charlie/MER103C	-11.34	0.63	X
LTR/ERV1/LTR34	-11.37	0.63	X
LTR/ERVL/LTR16E2	-9.3	0.63	X
LINE/L1/L1MA10	-5.75	0.64	X
LTR/ERV1/MER41-int	-3.17	0.64	X
LTR/ERVL/ERV3-16A3_LTR	-7.81	0.64	X
LTR/ERVL-MaLR/MLT1I-int	-8.99	0.64	X
Unknown/Unknown/UCON26	-29.38	0.64	X
DNA/hAT-Charlie/MER5B	-6.68	0.65	X
LTR/Gypsy?/LTR88b	-10.77	0.66	X
DNA/hAT-Charlie/MER117	-8.85	0.67	X
DNA/TcMar-Tigger/MERX	-4.25	0.67	X
LTR/ERV1/LTR26	-11.03	0.67	X
LTR/ERV1/LTR38-int	-4.68	0.67	X
LTR/ERVL/MER73	-0.94	0.67	X
DNA/hAT?/MamRep4096	-10.47	0.68	X
LTR/ERVK/MER9B	-8.8	0.68	X
LTR/ERVL/LTR86A1	-10.37	0.68	X
Satellite/telo/REP522	-13.86	0.68	X
Simple_repeat/(CAGA)n	-4.73	0.68	X
DNA/hAT-Charlie/Charlie7	-10.18	0.69	X
DNA/hAT-Tip100/MER91A	-6.83	0.69	X
LTR/ERV1/LTR38	-6.88	0.69	X
LTR/ERVL/MLT2E	-5.87	0.69	X
LTR/ERVK/LTR13_	-73.47	0.7	X
LTR/ERVL/LTR42	-18.12	0.7	X
DNA/hAT-Charlie/Charlie22a	-7.55	0.71	X
LINE/L1/L1M3e	-16.34	0.71	X
LTR/ERV1/MER66D	-18.03	0.71	X
LTR/ERVL-MaLR/MLT1J2-int	-10.93	0.71	X
LTR/Gypsy?/LTR85a	-6.2	0.71	X
DNA/hAT-Tip100/Arthur1C	-6.51	0.72	X
DNA/hAT-Tip100/MER45A	-9.52	0.72	X
DNA/TcMar-Tigger/Tigger11a	-0.46	0.72	X
LINE/CR1/Plat_L3	-8.8	0.72	X
LTR/ERV1/PrimLTR79	-5.07	0.72	X
LTR/ERVK/LTR3B_	-7.56	0.72	X
LTR/ERVL-MaLR/MLT1A-int	-2.21	0.72	X
LTR/Gypsy?/LTR85c	-11.72	0.72	X
DNA/hAT-Charlie/Charlie18a	-8.63	0.73	X
LTR/ERVL/LTR83	-4.49	0.73	X
DNA/hAT-Blackjack/MER63B	-12.08	0.74	X
LTR/ERVL-MaLR/MLT1-int	-16.61	0.74	X
LTR/ERVL-MaLR/MLT1N2	-9.18	0.74	X
SINE/Alu/FLAM_A	-7.96	0.74	X
DNA/hAT-Charlie/Charlie10	-1.87	0.75	X
DNA/PiggyBac/MER75	-1.56	0.76	X
LTR/ERV1/MER66A	-17.47	0.76	X
DNA/DNA/MER107	-17.84	0.77	X
Simple_repeat/(TATATG)n	-20.33	0.78	X
DNA/hAT-Charlie/Charlie20a	-15.1	0.79	X
DNA/hAT-Tip100/FordPrefect_a	-3.91	0.79	X
RC/Helitron/Helitron1Na_Mam	-3.35	0.79	X
LINE/RTE/ALINE	-21.38	0.8	X
Simple_repeat/(CGG)n	-4.4	0.8	X
DNA/hAT/MER53	-8.5	0.81	X
DNA/hAT-Tip100/ORSL-2a	-4.2	0.81	X
LTR/ERV1/LTR26B	-4.54	0.81	X
LTR/ERV1/MER41D	-12.23	0.81	X
Satellite/Satellite/MSR1	-7.21	0.81	X
LTR/ERVK/MER9a1	-6.95	0.82	X
LTR/ERV1/LTR19C	-8.25	0.83	X
LTR/ERV1/MER110A	-8.13	0.83	X
LTR/ERVL/MER70B	-14.73	0.83	X
LTR/ERVL-MaLR/MLT-int	-6.5	0.83	X
LTR/ERVL/HERVL40-int	-3.41	0.85	X
SINE/MIR/MIR3	-5.75	0.85	X
LTR/ERVL/MER70C	-29.03	0.87	X
LINE/CR1/CR1_Mam	-7.04	0.88	X
Simple_repeat/(CCG)n	-3.66	0.88	X
LINE/L1/HAL1b	-12.33	0.89	X
LTR/ERV1/MER72B	-9.59	0.9	X
LTR/ERVL/LTR69	-10.87	0.9	X
DNA/hAT-Charlie/MER5C1	-11.23	0.91	X
LINE/CR1/L3b	-9.51	0.91	X
LTR/ERV1/MER57C2	-0.02	0.91	X
LTR/ERV1/MER67B	-5.99	0.91	X
LTR/ERV1/MER92C	-9.57	0.91	X
RNA/RNA/7SK	-6.65	0.91	X
LINE/CR1/X6A_LINE	-18.2	0.92	X
Simple_repeat/(TAG)n	-5.47	0.92	X
LTR/ERV1/HERV35I-int	-8.1	0.94	X
LINE/Dong-R4/Mam_R4	-27.58	0.95	X
DNA/TcMar-Tigger/Tigger16a	-12.78	0.96	X
Simple_repeat/(TTAGGG)n	-11.26	0.97	X
DNA/TcMar-Tigger/Tigger14a	-10.85	0.98	X
DNA/hAT-Charlie/Charlie16a	-9.08	1	X
LINE/RTE/L5	-12.4	1	X
LTR/ERVL-MaLR/MLT1H2-int	-50.38	1	X
Simple_repeat/(TCG)n	-8.44	1.01	X
DNA/hAT-Tip100/MER45R	-9.25	1.02	X
LTR/ERV1/LTR72B	-9.73	1.04	X
LTR/ERVL/LTR80B	-6.8	1.05	X
DNA/hAT-Charlie/Charlie9	-0.9	1.06	X
DNA/TcMar-Tigger/Tigger16b	-0.41	1.06	X
LTR/ERV1/LOR1-int	-0.33	1.06	X
Simple_repeat/(CTCA)n	-7.55	1.07	X
SINE?/SINE?/MER131	-5.12	1.07	X
LINE/L1/L1P4d	-13.61	1.09	X
Simple_repeat/(GTGTG)n	-0.96	1.09	X
DNA/DNA/Eulor9A	-19.09	1.11	X
DNA/DNA/MER126	-17.29	1.11	X
DNA/hAT-Charlie/MER58D	-4.52	1.11	X
SINE/Deu/AmnSINE1	-14.59	1.11	X
Low_complexity/CT-rich	-7.59	1.12	X
SINE/tRNA/MamSINE1	-9.68	1.13	X
Simple_repeat/(TCTCTG)n	-2.43	1.14	X
Unknown/Unknown/UCON27	-14.71	1.14	X
DNA/TcMar-Tigger/MER6C	-2.11	1.15	X
Unknown/Unknown/UCON12	-36.47	1.17	X
DNA/hAT-Tip100/Arthur1A	-0.94	1.18	X
LTR/Gypsy/LTR81	-8.88	1.18	X
LTR/ERV1/LTR12E	-22.81	1.2	X
LTR/ERV1/MER51E	-20.82	1.2	X
DNA/PiggyBac?/UCON29	-27.59	1.22	X
DNA/hAT-Charlie/Charlie14a	-13.83	1.23	X
SINE/Alu/AluYg6	-1.9	1.25	X
DNA?/DNA?/MER124	-19.56	1.27	X
LINE/L1/L1P4c	-45.03	1.27	X
LTR/ERV1/MER34C	-2.11	1.27	X
SINE/Alu/AluYd8	-6.51	1.27	X
Unknown/Unknown/UCON9	-19.71	1.27	X
LTR/ERV1/MER83C	-7.87	1.28	X
Simple_repeat/(CTG)n	-8.3	1.29	X
DNA/hAT-Charlie/Charlie24	-6.06	1.32	X
DNA/TcMar-Tigger/Tigger3d	-5.72	1.34	X
LTR/LTR/LTR90A	-9.93	1.34	X
Simple_repeat/(TC)n	-19.39	1.35	X
DNA/TcMar?/Eulor8	-18.29	1.36	X
Simple_repeat/(CTCG)n	-1.44	1.36	X
SINE/SINE/LFSINE_Vert	-10.49	1.38	X
DNA/TcMar/DNA1_Mam	-4.09	1.41	X
LTR/ERV1/MER92A	-9.94	1.43	X
Simple_repeat/(CACCT)n	-9.35	1.46	X
Low_complexity/G-rich	-4.11	1.48	X
Low_complexity/T-rich	-2.87	1.49	X
Simple_repeat/(CCCCAG)n	-3.2	1.52	X
Low_complexity/GA-rich	-5.41	1.53	X
LTR/ERV1/LTR39-int	-18.98	1.53	X
Simple_repeat/(CAT)n	-9.68	1.54	X
DNA/hAT-Tip100/Zaphod3	-19.21	1.56	X
Unknown/Unknown/UCON6	-20.57	1.62	X
DNA/TcMar-Tigger/Tigger1a_Mars	-45.51	1.65	X
rRNA/rRNA/5S	-5.03	1.71	X
Unknown/Unknown/UCON8	-23.43	1.71	X
Simple_repeat/(CAGAGA)n	-2.34	1.72	X
Simple_repeat/(CTGGGG)n	-2.93	1.74	X
snRNA/snRNA/U2	-15.04	1.74	X
Simple_repeat/(ATG)n	-22.47	1.75	X
LTR/ERVL-MaLR/MLT1G3-int	-23.25	1.77	X
DNA/hAT-Tip100/ORSL	-6.55	1.81	X
Unknown/Unknown/UCON28b	-15.76	1.81	X
Unknown/Unknown/UCON20	-53.44	1.82	X
SINE/Deu/AmnSINE2	-1.44	1.88	X
Low_complexity/C-rich	-5.59	1.91	X
Simple_repeat/(CAGCC)n	-2.57	1.92	X
Simple_repeat/(CATATA)n	-1.35	1.93	X
Simple_repeat/(CAG)n	-8.8	1.95	X
DNA?/DNA?/Eulor5A	-4.68	1.96	X
DNA/TcMar-Tigger/MER47C	-1.23	2	X
LTR/ERVL/LTR52-int	-0.03	2.02	X
DNA/hAT-Blackjack/MER94	-8.83	2.06	X
DNA/hAT-Blackjack/MER81	-6.08	2.09	X
LINE/CR1/X7B_LINE	-4.74	2.16	X
Low_complexity/GC_rich	-2.96	2.17	X
LTR/ERV1/LTR58	-1.12	2.17	X
Simple_repeat/(CACG)n	-5.59	2.19	X
DNA/hAT-Tip100/MER91C	-4.02	2.24	X
Low_complexity/A-rich	-3.97	2.27	X
Simple_repeat/(TA)n	-7.5	2.35	X
Unknown/Unknown/UCON5	-16.84	2.43	X
Simple_repeat/(TGAG)n	-9.32	2.44	X
LINE/CR1/X2_LINE	-19.95	2.54	X
Simple_repeat/(CG)n	-4.48	2.66	X
Simple_repeat/(CACAC)n	-12.86	2.71	X
Simple_repeat/(ATGGTG)n	-3.37	2.84	X
Simple_repeat/(GGA)n	-7.86	2.84	X
SINE/Alu/AluYh9	-2.97	2.86	X
DNA/hAT-Tip100/MER97a	-0.08	2.9	X
Simple_repeat/(GCGTG)n	-5.15	2.91	X
DNA?/DNA?/Eulor2A	-7.98	2.97	X
Simple_repeat/(TGAA)n	-9	3.41	X
DNA?/DNA?/UCON14	-64	3.56	X
snRNA/snRNA/U6	-8.33	3.69	X
tRNA/tRNA/tRNA-Glu-GAA	-6.89	3.82	X
snRNA/snRNA/U8	-3.29	4.5	X
snRNA/snRNA/U13_	-3.7	4.56	X
tRNA/tRNA/tRNA-Leu-TTG	-6.62	5.61	X
DNA?/DNA?/Eulor12	-19.4	5.66	X
Simple_repeat/(TATAA)n	-60.23	7.79	X
Low_complexity/AT_rich	-10.78	8.47	X
LTR/ERV1/MER83A-int	-7.68	9.42	X
tRNA/tRNA/tRNA-Tyr-TAC	-6.17	10.42	X
Simple_repeat/(CGCGG)n	-10.33	-4.25		X
Simple_repeat/(ACGTG)n	-24.2	-4.22		X
Simple_repeat/(CCCCAA)n	-1.26	-3.98		X
Simple_repeat/(CCGCG)n	-7.25	-3.62		X
Satellite/telo/TAR1	-2.81	-2.96		X
LINE/L1?/X9_LINE	-19.81	-2.41		X
Simple_repeat/(CACGC)n	-1.92	-2.17		X
Simple_repeat/(CCCCG)n	-1.95	-2.16		X
Satellite/acro/ACRO1	-11.39	-2.04		X
Simple_repeat/(CAGG)n	-5.04	-2.04		X
SINE/Alu/AluYb9	-24.75	-1.94		X
Simple_repeat/(CCCTAA)n	-5.85	-1.93		X
Low_complexity/polypyrimidine	-9.46	-1.58		X
LINE/CR1/X8_LINE	-14.06	-1.51		X
Simple_repeat/(CAGGC)n	-1.11	-1.46		X
Simple_repeat/(GAGTG)n	-9	-1.36		X
Simple_repeat/(CGTG)n	-1.66	-1.31		X
DNA/hAT-Blackjack/MER94B	-5.83	-1.26		X
Simple_repeat/(TGG)n	-0.04	-1.24		X
DNA/hAT-Charlie/Charlie4	-4.85	-1.19		X
Simple_repeat/(TTCA)n	-6.67	-1.16		X
DNA/hAT/MER96B	-8.7	-1.06		X
Simple_repeat/(CATA)n	-3.69	-1.01		X
Simple_repeat/(CCA)n	-2.16	-0.99		X
LTR/ERVK/HERVK13-int	-10.13	-0.98		X
LINE/CR1/X5A_LINE	-24.01	-0.96		X
Simple_repeat/(TGGG)n	-8.59	-0.95		X
LTR/ERVK/LTR3B	-23.53	-0.93		X
Simple_repeat/(CAGGA)n	-42.67	-0.9		X
Simple_repeat/(CGGGG)n	-1.05	-0.85		X
Simple_repeat/(GAAA)n	-11.22	-0.81		X
Satellite/Satellite/SATR1	-20.38	-0.79		X
LINE/CR1/X1_LINE	-6.1	-0.76		X
LTR/ERV1/LTR60	-40.2	-0.73		X
LTR/ERV/MER95	-3.04	-0.72		X
LTR/ERV1/HERVS71-int	-4.89	-0.72		X
Simple_repeat/(CATTT)n	-1.34	-0.7		X
DNA/MuDR/Ricksha	-28.02	-0.68		X
LTR/ERV1/HERVH-int	-7.77	-0.67		X
LTR/ERV1/LTR24	-7.9	-0.66		X
LINE/L1/L1P3b	-26.1	-0.65		X
Satellite/Satellite/HSATII	-16.75	-0.65		X
Satellite/Satellite/SATR2	-38.28	-0.65		X
LTR/ERV1/MER51D	-6.9	-0.62		X
LTR/ERV1/MER51-int	-3.96	-0.62		X
LTR/ERVK/HERVK-int	-26.06	-0.62		X
DNA/hAT-Tip100/MER97b	-25.96	-0.6		X
LTR/ERVL/HERVL32-int	-0.34	-0.56		X
Simple_repeat/(CAGC)n	-20.05	-0.56		X
LINE/CR1/X6B_LINE	-13.9	-0.53		X
LTR/ERVL-MaLR/MLT1H1-int	-6.5	-0.53		X
LTR/ERV/LTR55	-8.08	-0.51		X
LTR/ERVL/LTR57	-12.51	-0.51		X
LTR/ERV1/MER89-int	-2.32	-0.5		X
Simple_repeat/(TTCC)n	-0.93	-0.48		X
LTR/ERVL/HERVL66-int	-21.25	-0.46		X
snRNA/snRNA/U13	-4.26	-0.46		X
LTR/ERV1/LTR10A	-6.99	-0.45		X
LTR/ERV1/LTR1C	-17.57	-0.45		X
LTR/ERV1/MER41C	-21.01	-0.45		X
LTR/ERV1/MER101	-12.02	-0.44		X
Simple_repeat/(CATG)n	-20.82	-0.42		X
DNA/PiggyBac/MER85	-3.64	-0.41		X
LTR/ERV1/LTR19-int	-9.1	-0.41		X
LTR/ERVL/LTR62	-9.36	-0.41		X
Satellite/Satellite/D20S16	-28.24	-0.41		X
DNA/hAT-Tip100/FordPrefect	-4.59	-0.39		X
LINE/L1/L1PBb	-15.18	-0.39		X
LTR/ERV1/Harlequin-int	-0.56	-0.36		X
LTR/ERVL/HERV16-int	-2.08	-0.36		X
LINE/L1/L1M	-7.99	-0.35		X
LTR/ERV1/LTR27B	-3.05	-0.34		X
LTR/ERVK/HERVKC4-int	-0.26	-0.34		X
LTR/ERV1/HERV4_I-int	-8.92	-0.33		X
LTR/ERV1/LTR75_1	-5.13	-0.33		X
LTR/ERV1/MER4A	-15.54	-0.33		X
rRNA/rRNA/LSU-rRNA_Hsa	-11.17	-0.32		X
Simple_repeat/(TG)n	-7.54	-0.32		X
LTR/ERV1/MER57F	-16.39	-0.31		X
LTR/ERV1/MER66-int	-8.12	-0.31		X
LTR/ERV1/MER83B-int	-1.15	-0.31		X
LTR/ERVK/HERVK9-int	-2.53	-0.3		X
Unknown/Unknown/UCON2	-64.5	-0.3		X
LTR/ERV1/LTR36	-9.67	-0.28		X
LTR/LTR/LTR90B	-21.86	-0.28		X
DNA/hAT-Tip100/MER97c	-35.34	-0.27		X
Simple_repeat/(CTATA)n	-83.72	-0.27		X
Simple_repeat/(TCCTG)n	-27.63	-0.27		X
DNA/TcMar-Tc2/Kanga1c	-13.01	-0.26		X
LTR/Gypsy/MamGypLTR2c	-2.6	-0.26		X
LTR/ERV1/LTR72	-30.38	-0.25		X
LTR/ERV1/MER4B-int	-12.76	-0.25		X
SINE/Alu/AluYa5	-18.44	-0.25		X
LTR/ERV1/LTR7	-5.13	-0.24		X
LTR/ERV1/MER39B	-5.92	-0.23		X
LTR/ERVL/LTR66	-5.42	-0.23		X
LTR/ERVL-MaLR/MST-int	-18.38	-0.23		X
LTR/ERV1/LTR71A	-9	-0.22		X
LTR/ERVK/LTR14A	-1.11	-0.22		X
LTR/ERVL-MaLR/MLT1C-int	-10.9	-0.22		X
LTR/ERV1/LTR23-int	-5.11	-0.21		X
LTR/ERV1/MER61D	-9.49	-0.21		X
LTR/ERV1/PRIMA4-int	-4.14	-0.21		X
DNA/hAT/MER96	-3.42	-0.19		X
LTR/ERV1/HERVE-int	-4.74	-0.19		X
LTR/ERV1/HERVI-int	-5.06	-0.19		X
LTR/ERV1/LTR7Y	-4	-0.19		X
LINE/L1/L1MEg1	-0.21	-0.18		X
DNA/hAT-Tip100/MER91B	-7.05	-0.17		X
LTR/ERVL/LTR86C	-5.9	-0.17		X
SINE/Alu/FRAM	-7.96	-0.17		X
LTR/ERV1/MER51B	-11.9	-0.16		X
LTR/ERV1/MER83	-12.55	-0.16		X
scRNA/scRNA/HY3	-4.44	-0.16		X
LTR/ERV1/LTR2C	-12.49	-0.15		X
LTR/ERV1/MER101B	-3.72	-0.15		X
SINE/Alu/AluSq10	-2.3	-0.15		X
DNA/TcMar-Tigger/Tigger3	-5.48	-0.14		X
LTR/ERVL/LTR33C	-7.24	-0.14		X
LTR/ERV1/PABL_B-int	-11.67	-0.13		X
LTR/ERV1/PRIMA41-int	-7.6	-0.13		X
Simple_repeat/(TCTA)n	-13.47	-0.13		X
SINE/Alu/AluYf5	-8.93	-0.12		X
DNA/TcMar-Tigger/Tigger6b	-17.53	-0.11		X
LTR/ERV1/LTR35A	-12.23	-0.11		X
LTR/ERV1/MER4D	-12.14	-0.11		X
LTR/ERV1/MER61B	-4.18	-0.11		X
LTR/ERVL/MER54A	-0.74	-0.11		X
LTR/ERV1/LTR6A	-12.4	-0.1		X
LTR/ERV1/LTR2	-27.59	-0.09		X
LTR/ERVK/LTR22	-7.71	-0.09		X
LTR/ERVL/LTR16D2	-34.99	-0.09		X
LTR/ERV1/HUERS-P3-int	-7.15	-0.08		X
LTR/ERV1/LTR44	-22.2	-0.08		X
LTR/ERVL-MaLR/MLT1K-int	-4.55	-0.08		X
DNA/hAT-Charlie/Charlie21a	-12.97	-0.07		X
LTR/ERV1/LTR54	-10.16	-0.07		X
LTR/ERV1/MER41G	-2.22	-0.07		X
LTR/ERV1/MER66C	-15.08	-0.07		X
LTR/ERVL/MER21A	-5.81	-0.07		X
LTR/ERVL?/LTR87	-6.36	-0.07		X
LTR/ERVL/LTR18A	-11.78	-0.06		X
LTR/Gypsy/LTR81A	-12.23	-0.06		X
LTR/ERV1/LTR10E	-4.95	-0.05		X
LTR/ERV1/MER65C	-13.67	-0.05		X
LTR/ERVK/LTR13A	-10.75	-0.05		X
LINE/L1/L1M2a1	-17.02	-0.04		X
LTR/ERV1/LTR12D	-12.98	-0.03		X
LTR/ERV1/LTR23	-11.19	-0.03		X
LTR/ERV1/MER34B-int	-18.24	-0.03		X
LTR/ERVK/LTR5B	-5.02	-0.03		X
LTR/ERVL/MER21-int	-11.38	-0.03		X
DNA/hAT-Charlie/Charlie10b	-12.5	-0.02		X
LTR/ERV1/LTR46	-14.08	-0.02		X
LTR/ERV1/MER57A1	-26.83	-0.02		X
LTR/ERVL/MLT2C2	-11.65	-0.02		X
LTR/ERVL-MaLR/MLT1J1-int	-13.14	-0.02		X
LTR/ERVL-MaLR/MLT1M	-3.56	-0.02		X
scRNA/scRNA/BC200	-15.25	-0.02		X
DNA/Merlin/Merlin1_HS	-44.26	-0.01		X
LTR/ERV1/LTR29	-15.33	-0.01		X
LTR/ERV1/LTR35B	-12.29	-0.01		X
LTR/ERV1/LTR61	-19.89	-0.01		X
LTR/ERV1/LTR73	-4.98	-0.01		X
LTR/ERVL/LTR75B	-14.51	-0.00939565		X
LTR/ERV1/LTR31	-6.75	-0.00637058		X
DNA/TcMar?/MER121	-20.72	-0.00514559		X
LTR/ERV1/LTR1B	-5.99	-0.00498878		X
LTR/ERVL/MLT2B4	-11.2	-0.00181096		X
SINE/Alu/AluSx	-7.04	-0.00113281		X
Unknown/Unknown/UCON4	9.8	0.00921626			X
LTR/ERV1/LTR2B	13.23	0.04			X
LTR/ERV1/LTR27	0.14	0.06			X
SINE/Alu/AluYc5	0.15	0.08			X
LTR/ERV1/LTR10B1	2.91	0.09			X
LTR/ERVL-MaLR/THE1D-int	4.77	0.09			X
LINE/L1/L1M2c	2.44	0.1			X
LINE/L1/L1PA6	2.24	0.13			X
LTR/ERV1/LTR45	2.19	0.13			X
LTR/ERVK/LTR5_Hs	3.74	0.13			X
LTR/ERVK/LTR3A	4.97	0.14			X
LTR/ERVK/MER11A	2.98	0.16			X
LINE/L1/L1PA17	4.13	0.18			X
LTR/ERV1/MER34-int	0.16	0.19			X
LTR/ERV1/LTR7B	0.5	0.2			X
LINE/L1/L1M2a	0.59	0.22			X
LTR/ERVL-MaLR/MSTA-int	9.6	0.25			X
LINE/L1/L1PA14	4.86	0.26			X
LTR/ERV1/LTR10F	11.69	0.27			X
LTR/ERVK/MER9a3	7.31	0.27			X
LTR/ERVL-MaLR/MLT1E3-int	45.38	0.27			X
LINE/L1/L1PB2	0.12	0.28			X
LTR/ERV1/HUERS-P3b-int	0.76	0.28			X
LTR/ERVL/MLT2B3	0.57	0.28			X
LTR?/LTR?/MER129	3.88	0.28			X
DNA/hAT-Tip100/MER97d	0.11	0.29			X
LINE/L1/L1M3b	2.94	0.34			X
DNA/PiggyBac/Looper	4.09	0.35			X
Simple_repeat/(CACAG)n	6.49	0.38			X
LINE/L1/L1M2	0.62	0.39			X
LTR/ERVL/MLT2A2	1.13	0.39			X
LINE/L1/HAL1-3A_ME	4.02	0.41			X
LTR/ERV1/MER4E	0.02	0.42			X
DNA/TcMar-Tigger/Tigger4a	0.08	0.43			X
LINE/L1/L1M3de	4.55	0.43			X
LTR/ERV1/MER50C	21.8	0.43			X
DNA/MuDR/Ricksha_b	0.29	0.45			X
LINE/RTE-BovB/X3_LINE	0.9	0.45			X
LTR/ERV1/HERV1_I-int	6.75	0.45			X
LINE/L1/L1MA1	1.97	0.48			X
LTR/ERV1/MER50B	3.52	0.49			X
Simple_repeat/(TTTC)n	17.02	0.5			X
LINE/L1/L1PA12	2.5	0.53			X
LTR/ERVK/LTR5A	89.66	0.54			X
LINE/CR1/X7A_LINE	0.12	0.59			X
LTR/ERVK/LTR14C	20.82	0.6			X
LINE/L1/L1M3d	4.81	0.7			X
LTR/ERVL/MLT2B5	1.25	0.71			X
LTR/ERVL-MaLR/MSTC-int	5.07	0.77			X
LTR/ERV1/LTR10B	9.44	0.79			X
LTR/ERV1/PRIMAX-int	6.26	0.79			X
LINE/CR1/X5B_LINE	6.37	0.8			X
LTR/ERV1/MER84-int	1.72	0.8			X
LINE/L1/HAL1-2a_MD	6.84	0.84			X
LTR/ERVL/MER74C	6.4	0.85			X
LTR/Gypsy/MamGyp-int	1.56	0.85			X
RC/Helitron?/Helitron2Na_Mam	3.32	0.9			X
LTR/ERVL-MaLR/MSTB2-int	4.16	0.91			X
LTR/ERV1/LTR25	4.22	0.93			X
LTR/ERV1/MER57E3	0.85	0.98			X
Satellite/centr/ALR/Alpha	5.74	1.07			X
DNA/DNA/Eulor11	0.55	1.12			X
Simple_repeat/(CAATA)n	6.96	1.49			X
snRNA/snRNA/U17	2.39	1.64			X
Simple_repeat/(GGAA)n	5.46	1.71			X
Simple_repeat/(TAGA)n	6.68	1.74			X
Simple_repeat/(CCCTAG)n	2.23	1.76			X
Satellite/Satellite/HSATI	0.5	1.79			X
snRNA/snRNA/U4	1.72	2.03			X
snRNA/snRNA/U3	0.65	2.13			X
DNA/hAT-Charlie/MER30B	6.43	2.48			X
snRNA/snRNA/U1	2.7	2.85			X
Simple_repeat/(GGCTG)n	2.8	3.15			X
LINE?/Penelope?/UCON13	26.03	3.3			X
Simple_repeat/(CCAA)n	8.69	3.86			X
scRNA/scRNA/HY1	1.01	4.28			X
Simple_repeat/(CCTA)n	3.75	4.56			X
scRNA/scRNA/HY4	5.85	6.08			X
Simple_repeat/(CTCTG)n	1.07	6.19			X
DNA?/DNA?/Eulor2C	7.24	-2.35				X
LTR/ERV1/HERV1_LTRd	0.78	-2.15				X
Simple_repeat/(AGGTG)n	12.13	-2.15				X
Simple_repeat/(CTGTG)n	12.56	-1.65				X
DNA?/DNA?/Eulor10	9.29	-0.85				X
Simple_repeat/(CCCGAA)n	3.84	-0.68				X
LTR/ERV1/LTR46-int	10.45	-0.65				X
Satellite/Satellite/HSAT5	2.12	-0.65				X
LTR/ERVL-MaLR/MLT1N2-int	4	-0.61				X
LTR/ERV1/MER87	3.57	-0.5				X
Simple_repeat/(CTAGGG)n	16.33	-0.49				X
LTR/ERVL-MaLR/MLT1E1A-int	14.53	-0.45				X
rRNA/rRNA/SSU-rRNA_Hsa	0.97	-0.42				X
LTR/ERV1/HERV3-int	0.83	-0.38				X
LTR/ERV1/HERVH48-int	0.14	-0.38				X
LTR/ERVL/MER88	17.87	-0.38				X
Satellite/Satellite/BSR/Beta	8.79	-0.37				X
LTR/ERV/LTR11	3.18	-0.31				X
LTR/ERV1/LTR7C	2.49	-0.22				X
LTR/Gypsy/LTR81AB	1.62	-0.17				X
LINE/CR1/X7C_LINE	2.36	-0.16				X
LTR/ERVK/LTR14	4.35	-0.16				X
LTR/ERVK/HERVK3-int	0.04	-0.15				X
LTR/ERV1/HERVE_a-int	0.54	-0.14				X
LTR/ERV1/PABL_A	12.16	-0.14				X
SINE/Alu/AluYf4	0.07	-0.13				X
LTR/ERV1/LTR12_	0.53	-0.12				X
LTR/ERV1/HERV15-int	5.81	-0.1				X
DNA/hAT-Charlie/Charlie12	1	-0.05				X
LTR/ERV1/MER52A	0.24	-0.05				X
LTR/ERV1/LTR4	6.58	-0.02				X
srpRNA/srpRNA/7SLRNA	6.42	-0.02				X
Unknown/Unknown/MamRep564	2.52	-0.01				X
