# Supplementary material for: Global DNA Hypomethylation in Epithelial Ovarian Cancer: Passive Demethylation and Association with Genomic Instability
Source: Cancers (Basel). 2020 Mar 24;12(3):764. doi: 10.3390/cancers12030764 (PMC7140107; doi:10.3390/cancers12030764)
Supplement: Supplementary file 1 [file cancers-12-00764-s001.zip › Wa_ Supplementary Table 12 REs vs. hypo blocks.xlsx]

## Sheet: ER vs. hypoblocks
Zhang et al. Supplementary Table 12. Repeat elements vs. hypo blocks in EOC.
Repeat	Total Repeats	Repeat inside Hypo Blocks	Enrichment or Change in Numbers of Repeats from Expected	CHI-Square Test pvalue
LINE/Penelope	51	21	12.1762	0.0553258
DNA/PiggyBac	241	98	11.6636	6.59762e-05
Unknown/Unknown	97	38	10.1749	0.0272127
DNA/Merlin	57	22	9.59617	0.110347
DNA/DNA	1881	694	7.89495	4.48987e-14
SINE/Deu	1265	466	7.83763	8.08353e-10
DNA/DNA	2744	1007	7.69793	6.29968e-19
SINE/SINE	962	344	6.75852	3.84382e-06
LTR/LTR	122	43	6.24558	0.128441
SINE/MIR	595094	206018	5.61909	0
LTR/LTR	2206	763	5.58717	7.33112e-09
LTR/Gypsy	7869	2714	5.48945	7.24364e-27
DNA/hAT-Blackjack	19755	6714	4.98601	8.26822e-54
DNA/hAT	12573	4261	4.88976	1.29764e-33
SINE/SINE	425	143	4.64674	0.0347619
DNA/TcMar	3424	1149	4.55692	4.19361e-09
LINE/L1	84	28	4.33301	0.381473
LTR/ERV	579	192	4.1603	0.0273736
DNA/hAT-Tip100	30669	10108	3.95804	1.11052e-52
LTR/Gypsy	10892	3584	3.90457	2.69719e-19
LINE/CR1	61303	20152	3.87246	4.22065e-99
DNA/hAT	3050	1002	3.85214	2.75382e-06
RNA/RNA	729	237	3.50997	0.0367515
LINE/L2	466438	151514	3.48288	0
Unknown/Unknown	7036	2270	3.26233	1.63341e-09
Simple_repeat	417913	133878	3.03458	0
LINE/Dong-R4	556	178	3.01407	0.11729
DNA/TcMar-Mariner	16348	5192	2.75892	7.60783e-15
LTR/ERVL-MaLR	347105	110178	2.74166	1.55321e-277
RC/Helitron	1800	569	2.61079	0.0146441
RC/Helitron	436	136	2.19234	0.313052
SINE/tRNA	1668	519	2.11479	0.0569853
DNA/hAT-Charlie	254646	79188	2.09697	2.77071e-120
LINE/RTE	17874	5495	1.74266	2.8297e-07
DNA/MuDR	1992	607	1.47157	0.147778
LTR/ERVL	160346	48297	1.12017	4.8281e-23
LTR/ERVL	1854	550	0.665269	0.527857
DNA/TcMar-Tc2	8156	2371	0.0703042	0.888721
Low_complexity	371543	107181	-0.152783	0.0401365
LINE/RTE-BovB	655	185	-0.756044	0.669801
LINE/L1	951780	264352	-1.22583	4.44788e-153
rRNA/rRNA	1769	491	-1.24452	0.248683
DNA/TcMar	1950	534	-1.6157	0.115869
DNA/TcMar-Tigger	104026	28310	-1.78597	6.34445e-37
LTR/ERV1	175937	47786	-1.83946	7.73071e-65
DNA/PiggyBac	2120	567	-2.25504	0.0221266
tRNA/tRNA	2002	535	-2.27704	0.0247492
SINE/Alu	1194734	292495	-4.5183	0
snRNA/snRNA	4386	1068	-4.65011	1.14608e-11
LTR/ERVK	10868	2615	-4.93885	7.69726e-30
Other/Other	3733	817	-7.11444	9.75774e-22
Satellite/telo	405	84	-8.25958	0.000249124
srpRNA/srpRNA	1481	293	-9.21639	5.43402e-15
scRNA/scRNA	1340	242	-10.9406	1.08472e-18
Satellite/Satellite	6775	1052	-13.4726	6.63846e-132
Satellite/centr	2325	347	-14.0756	1.3992e-50
Satellite/acro	61	0	-29.0003	5.98871e-07
