# Supplementary material for: Global DNA Hypomethylation in Epithelial Ovarian Cancer: Passive Demethylation and Association with Genomic Instability
Source: Cancers (Basel). 2020 Mar 24;12(3):764. doi: 10.3390/cancers12030764 (PMC7140107; doi:10.3390/cancers12030764)
Supplement: Supplementary file 1 [file cancers-12-00764-s001.zip › Wa_ Supplementary Table 13 EOC Clinicopathological Info.xlsx]

## Sheet: EOC clinico-pathology
Zhang et al. Supplementary Table 13. EOC sample clinicopathological information.
Sample ID	LINE-1 Methylation1 (%)	Stage	Grade	Histotype	Patient Age	Affymetrix GE Microarray2	Affymetrix disease-matched subgroup analysis	Total RNAseq3	Illumina 450K4	Methyl-seq5	Genomic copy number6
EOC 1	37	IIIC	3	serous	46	GDHO (+)	YES		GDHO (+)		GDHO (+)
EOC 2	50.5	IIIC	3	serous	80	GDHO (+)	YES
EOC 3	48	IIIC	3	serous	68
EOC 4	66.5	IIIC	3	serous	51						GDHO (‒)
EOC 5	76	IIIC	3	serous	77	GDHO (‒)	YES	GDHO (‒)	GDHO (‒)		GDHO (‒)
EOC 6	64.5	IIIC	3	serous	81						GDHO (‒)
EOC 7	34	IV	3	serous	73	GDHO (+)	YES		GDHO (+)		GDHO (+)
EOC 8	76	IIIC	3	carcinosarcoma	89	GDHO (‒)
EOC 9	60.5	IA	NA	serous, borderline	58
EOC 10	53.5	IIIC	3	serous	56
EOC 11	73.5	IIIB	3	serous	81	GDHO (‒)	YES		GDHO (‒)		GDHO (‒)
EOC 12	75	IIIC	3	serous	49	GDHO (‒)	YES		GDHO (‒)		GDHO (‒)
EOC 13	29.5	IV	3	mixed	54	GDHO (+)
EOC 14	63	IV	3	serous	73
EOC 15	70.5	Unstaged	3	serous	67
EOC 16	61.5	IIIC	3	serous	57
EOC 17	62.33	IV	3	serous	58
EOC 18	50	IIIC	3	serous	36
EOC 19	72.5	IB	2	serous	57
EOC 20	61.5	IIC	1	endometroid	77
EOC 21	63.5	IIB	3	mucinous	80
EOC 22	66.5	IIIC	NA	serous, borderline	30
EOC23	65.5	IIIC	2	serous	44
EOC 24	53.5	IIIC	3	carcinosarcoma	54
EOC 25	43	IIIC	3	mixed	79
EOC 26	66.5	IIIC	2	serous	67
EOC 27	70.5	IIIC	3	serous	71						GDHO (‒)
EOC 28	64.5	IV	3	serous	70						GDHO (‒)
EOC 29	52	IIIC	3	serous	70
EOC 30	45	IIIC	3	serous	70						GDHO (+)
EOC 31	54	IIIC	3	serous	53
EOC 32	76	IC	3	serous	46	GDHO (‒)
EOC 33	15.5	IIIC	3	serous	75						GDHO (+)
EOC 34	67	IIIC	2	serous	48
EOC 35	55.67	IIB	1	mucinous	38
EOC 36	53.5	IV	3	serous	77
EOC 37	61.5	IC	3	clear cell	51
EOC 38	51	IV	3	mixed	67	GDHO (+)
EOC 39	48	IV	3	serous	62	GDHO (+)	YES
EOC 40	51	IIIC	3	carcinosarcoma	67
EOC 41	74.5	IIIC	2	mucinous	66	GDHO (‒)
EOC 42	67	IIIC	3	serous	63						GDHO (‒)
EOC 43	39	IIIC	3	serous	78	GDHO (+)	YES		GDHO (+)		GDHO (+)
EOC 44	43	IIIC	3	serous	48	GDHO (+)	YES		GDHO (+)		GDHO (+)
EOC 45	72	IC	2	endometroid	52	GDHO (‒)
EOC 46	65.5	IIIC	3	serous	58						GDHO (‒)
EOC 47	53.5	IIIC	2	serous	46
EOC 48	73	IA	NA	granulosa cell	65	GDHO (‒)
EOC 49	62.5	IIIC	3	serous	50
EOC 50	49.5	IIIC	3	serous	75						GDHO (+)
EOC 51	73	IIB	3	clear cell	58	GDHO (‒)
EOC 52	50.5	IIIC	3	serous	70	GDHO (+)	YES
EOC 53	18.5	IV	3	serous	73	GDHO (+)					GDHO (+)
EOC 54	72.5	IIIC	3	serous	74	GDHO (‒)	YES		GDHO (‒)		GDHO (‒)
EOC 55	50	IIIC	3	serous	60
EOC 56	73.5	IIIC	3	PNET	78
EOC 57	32.5	IIIC	3	serous	51	GDHO (+)	YES		GDHO (+)		GDHO (+)
EOC 58	75	IA	2	immature teratoma	28	GDHO (‒)
EOC 59	73	IIIC	3	serous	71	GDHO (‒)	YES		GDHO (‒)	GDHO (‒)
EOC 60	18	IIIC	3	serous	82	GDHO (+)	YES		GDHO (+)		GDHO (+)
EOC 61	41.5	IIIC	3	serous	56						GDHO (+)
EOC 63	41.5	IIIC	3	clear cell	51	GDHO (+)
EOC 64	51	IIIC	3	serous	62
EOC 65	57.5	IIIC	3	serous	73
EOC 66	72.5	IIIC	3	serous	40	GDHO (‒)	YES		GDHO (‒)		GDHO (‒)
EOC 67	37.5	IIIC	3	serous	42	GDHO (+)	YES		GDHO (+)		GDHO (+)
EOC 68	71	IIIC	2	serous	68	GDHO (‒)
EOC 69	49.5	IIIC	3	mixed	59
EOC 70	72	IIB	3	clear cell	55
EOC 71	54	IIIC	3	serous	62
EOC 72	38.5	IIIC	2	mucinous	73	GDHO (+)
EOC 73	56.33	IIIC	3	serous	57
EOC 74	46	IIIC	3	serous	62						GDHO (+)
EOC 75	58	IIC	2	mucinous	83
EOC 76	56	IA	1	mucinous	56
EOC 77	50.5	IIIC	3	serous	71
EOC 78	44.5	IV	3	serous	78						GDHO (+)
EOC 79	30	IIIC	2	endometroid	65
EOC 80	69	IIIC	3	serous	64						GDHO (‒)
EOC 81	64.5	IA	2	clear cell	60
EOC 82	74.5	IV	3	serous	65	GDHO (‒)	YES		GDHO (‒)		GDHO (‒)
EOC 83	72.5	IIIC	3	mixed	75	GDHO (‒)		GDHO (‒)	GDHO (‒)	GDHO (‒)
EOC 84	46.25	IIC	3	serous	71
EOC 85	46.5	IIIC	3	serous	64						GDHO (+)
EOC 86	59	IIIC	2	serous	68
EOC 87	71.5	IIIC	2	serous	59	GDHO (‒)
EOC 88	68	IC	2	mixed	50
EOC 89	40.5	IIIC	3	serous	73	GDHO (+)	YES				GDHO (+)
EOC 90	54.33	IIC	3	clear cell	56
EOC 91	48.5	IIIC	3	serous	67	GDHO (+)	YES	GDHO (+)	GDHO (+)	GDHO (+)	GDHO (+)
EOC 93	50.5	IIIC	3	carcinosarcoma	69
EOC 94	48.67	IIIC	3	carcinosarcoma	54
EOC 95	60	IIIC	3	serous	62
EOC 96	43	IIIC	3	serous	75	GDHO (+)	YES	GDHO (+)	GDHO (+)		GDHO (+)
EOC 97	46	IIIC	3	carcinosarcoma	69	GDHO (+)
EOC 98	66.5	IIIC	3	serous	89						GDHO (‒)
EOC 99	74.5	IIIB	3	serous	26	GDHO (‒)	YES		GDHO (‒)		GDHO (‒)
EOC 100	26.5	IIIC	3	carcinosarcoma	84	GDHO (+)			GDHO (+)	GDHO (+)
EOC 101	55	IIIC	3	serous	22
EOC 103	62.67	IIIC	3	mixed	84
EOC 104	58.75	IIIC	3	serous	51
EOC 106	60	IIIC	3	carcinosarcoma	69
EOC 107	44	IIIC	3	serous	54						GDHO (+)
EOC 108	69.25	IIIC	3	mixed	49
EOC 109	52.5	IIIC	2	serous	63
EOC 111	63	IIIC	2	serous	68
EOC 112	63.6667	IIIC	3	serous	51
EOC 113	72	IV	3	serous	65
EOC 114	71	IIB	1	endometroid	73
EOC 115	21.3333	IIIC	3	mixed	71
EOC 116	69.5	IIIC	1	clear cell	52
EOC 117	75.6667	IV	2	clear cell	49
EOC 118	73	IIIC	2	serous	78
EOC 119	74	IIIC	3	mixed	49
EOC 120	68.6667	IIIC	3	mixed	74
EOC 121	49	IIIC	3	serous	87
EOC 122	72	IIIC	3	small cell	49
EOC 123	61	IIIC	3	serous	45
EOC 127	42.6667	IIIC	2	serous	62
EOC 128	75.3333	IIIC	2	mucinous	84
EOC 129	63	IIIC	3	serous	64
EOC 130	71.75	IA	NA	granulosa cell	82
EOC 131	69.3333	IB	1	serous, borderline	29
EOC 132	72.6667
EOC 133	74	IA	1	mucinous, borderline	21
EOC 134	63	IIIC	1	serous	62
EOC 135	66	IIIC	3	mixed	56
EOC 136	48	IIIC	3	serous	67
EOC 137	72.3333	IIIC	NA	serous, borderline with microinvasion	55
EOC 138	72.6667	IIIC	1	mucinous	66
EOC 139	72	IIIC	3	serous	62						GDHO (‒)
EOC 140	72.3333	IIIC	2	serous	48
EOC 142	70.3333	IV	3	serous	71						GDHO (‒)
EOC 143	42	IIIC	3	serous	82						GDHO (+)
EOC 144	51	IIIC	2	serous	74
EOC 145	61.25	IIIC	2	mixed	67
EOC 146	57	IIIC	3	serous	85
EOC 147	70	IIIC	3	serous	48						GDHO (‒)
EOC 148	46	IIIC	3	endometroid	65
EOC 149	70.5	IIIC	3	carcinosarcoma	53
EOC 150	76.5	IIIC	3	serous	85	GDHO (‒)	YES		GDHO (‒)		GDHO (‒)
EOC 151	71	IIIC	3	serous	64						GDHO (‒)
EOC 152	76	IIIC	1	mixed	55	GDHO (‒)
1 As determined by sodium bisulfite pyrosequencing
2 Human HG 1.0ST arrays. Performed at the UB Center of Excellence Genomics and Bioinformatics Core Facility.
3 Total RNA sequencing using Illumina TruSeq Stranded Total RNA kit. Performed at the UNMC sequencing core facility.
4 Ilumina 450K BeadArrays. Performed at the RPCI Genomics and the University of Utah Genomics core facilities.
5 Agilent SureSelect Methylome Sequencing. Performed at the UNMC Epigenomics Core Facility.
6 Affymetrix Cytoscan HD arrays. Performed at the UNMC sequencing core facility.
