# Supplementary material for: Global DNA Hypomethylation in Epithelial Ovarian Cancer: Passive Demethylation and Association with Genomic Instability
Source: Cancers (Basel). 2020 Mar 24;12(3):764. doi: 10.3390/cancers12030764 (PMC7140107; doi:10.3390/cancers12030764)
Supplement: Supplementary file 1 [file cancers-12-00764-s001.zip › Wa_ Supplementary Table 14 Genomic Analyses Sample List.xlsx]

## Sheet: Sample summary
Zhang et al. Supplementary Table 14. Sample groups and genomic/epigenomic analyses performed.
Sample Group	LINE-1 Methylation1 (%)	Genomic/Epigenomic Analyses
		(Number of samples analyzed)
		Affymetrix GE Microarray2	Total RNAseq3	Illumina 450K4	Methyl-seq5	Genomic copy number6
Bulk normal ovary (NO)	72.5	3	2	2	0	0
Ovarian surface epithelia (OSE)	73.3	0	0	8	1	0
Fallopian tube epithelia (FTE)	72.8	0	0	8	1	0
GDHO(+) EOC	39.6	20	2	10	2	20
GDHO(–) EOC	71.7	20	2	10	2	20
1 Group average, as determined by sodium bisulfite pyrosequencing.
2 Human HG 1.0ST arrays. Performed at the UB Center of Excellence Genomics and Bioinformatics Core Facility.
3 Total RNA sequencing using Illumina TruSeq Stranded Total RNA kit. Performed at the UNMC sequencing core facility.
4 Ilumina 450K BeadArrays. Performed at the RPCI Genomics and the University of Utah Genomics core facilities.
5 Agilent SureSelect Methylome Sequencing. Performed at the UNMC Epigenomics Core Facility.
6 Affymetrix Cytoscan HD arrays. Performed at the UNMC sequencing core facility.
