# Supplementary material for: Global DNA Hypomethylation in Epithelial Ovarian Cancer: Passive Demethylation and Association with Genomic Instability
Source: Cancers (Basel). 2020 Mar 24;12(3):764. doi: 10.3390/cancers12030764 (PMC7140107; doi:10.3390/cancers12030764)
Supplement: Supplementary file 1 [file cancers-12-00764-s001.zip › Wa_ Supplementary Table 15 Primer Sequences.xlsx]

## Sheet: Primers
Zhang et al. Supplementary Table 15. Primer sequences.
Targeted Gene		Primer sequence	Product Size (bp)	Annealing Temp (°C)	Reference (if applicable)
Reverse Transcriptase-Quantitative PCR primers
18S rRNA	F:	5'- CAGCCACCCGAGATTGAGCA -3'	253	59
	R:	5'- TAGTAGCGACGGGCGGTGTG -3'
MKI67	F:	5'- TCGACCCTACAGAGTGCTCA -3'	210	60
	R:	5'- GTGGGGAGCAGAGGTTCTTC -3'
FOXM1	F:	5'- AGCAGGCTGCACTATCAACAA -3'	260	60
	R:	5'- AAGTCATGCGCTTCCTCTCA -3'
DNMT1	F:	5'- GACAGCTTAACAGAAAAGGAATG -3'	141	59	Samaei NM, et al.
	R:	5'- AGCCAGGTAGCCCTCCTC -3'			J Biomed Sci. 2014 Aug 9; 21:73
DNMT3A	F:	5'- TCAGCAAAGTGAGGAC -3'	139	58	Sheng W, et al.
	R:	5'- TGGACTGGGAAACCAAATACC -3'			Int J Mol Med. 2013 Sep; 32(3): 694-702
DNMT3B	F:	5'- TCCCAGCTCTTACCTTACCATC -3'	151	61	Sheng W, et al.
	R:	5'- ATCTCCACTGTCTGCCTCCA -3'			Int J Mol Med. 2013 Sep; 32(3): 694-702
Bisulfite sequencing primers
CCNE1	F:	5'- GTAGGTTTTGTTATTTGGTTT -3'	576	58
	R:	5'- AACTACCTCAATATCCCCTCCAC -3'	(90 CpGs)
FOXM1	F:	5’- TTTTTTAGTGAGGAAATTAATTAAAGT -3'	659	54
	R:	5’- CAAACCAAACCTAAAACTCCATTAC -3'	(72 CpGs)
HIST1H3I	F:	5'- AGTAGATTAAATTGGGAGTTAATTT -3'	614	54
	R:	5'- AAAAACTCTAAAAAAAACCTTTTAA -3'	(47 CpGs)
HIST1H4L	F:	5'- AGAGGTGATAGGAAAAATAGGTTGTAA -3'	806	59
	R:	5'- CCACTAAATAATACTAAAAAAAACACC -3'	(43 CpGs)
HIST1H3B	F:	5'- GTGGTTTGATTTTATAAAAGAAGAGTAGTT -3'	621	52
	R:	5'- AAAAAATCCTTAAAAATTTATTCTATT -3'	(41 CpGs)
Pyrosequencing primers
LINE-1	F:	5'- TTGAGTTAGGTGTGGGATATAGTT -3'	147	60
	R:	5'- biotin-CAAAAAATCAAAAAATTCCCTTTC -3'
	S:	5'- ATTAGGGTGGGAGTGA -3'
	Analyzed sequence: TTYGATTTTT TAGGTGYGTT YGTTATTTTT TTTTTTGATT
